# Supplementary material
Source: ML conference proceedings conference paper supplement (https://openreview.net/forum?id=oRnOH9N3Bl)

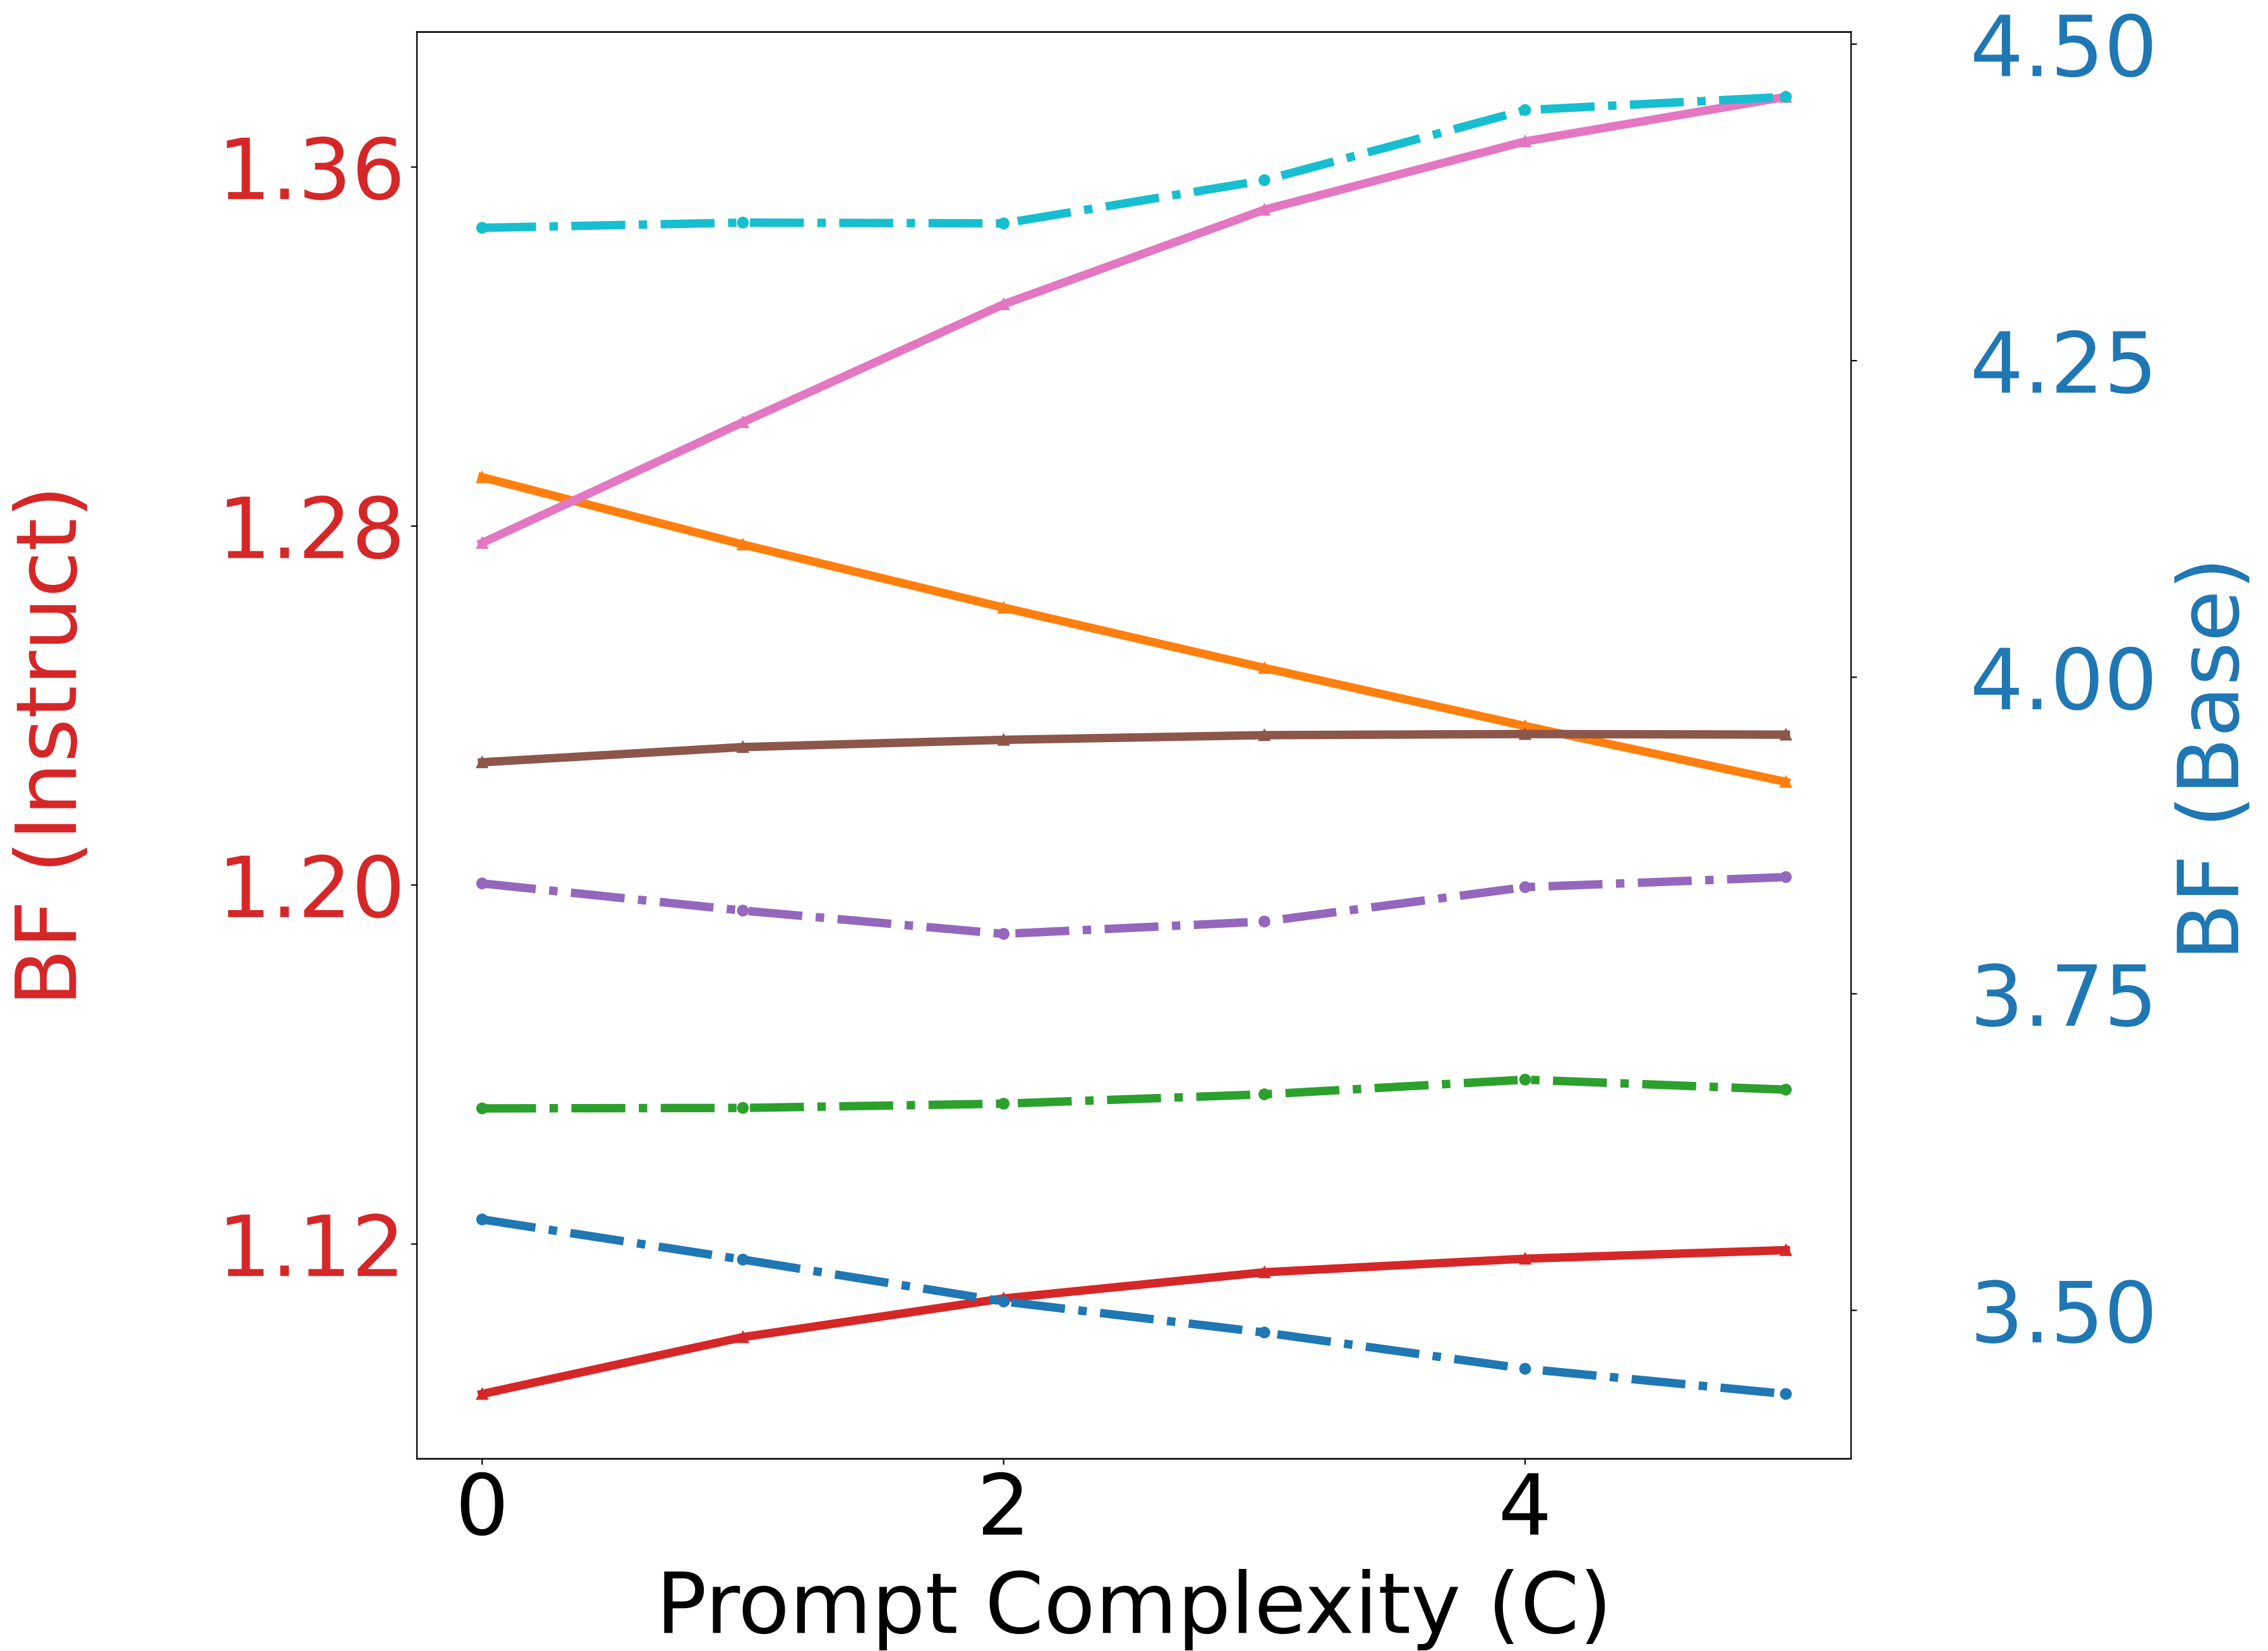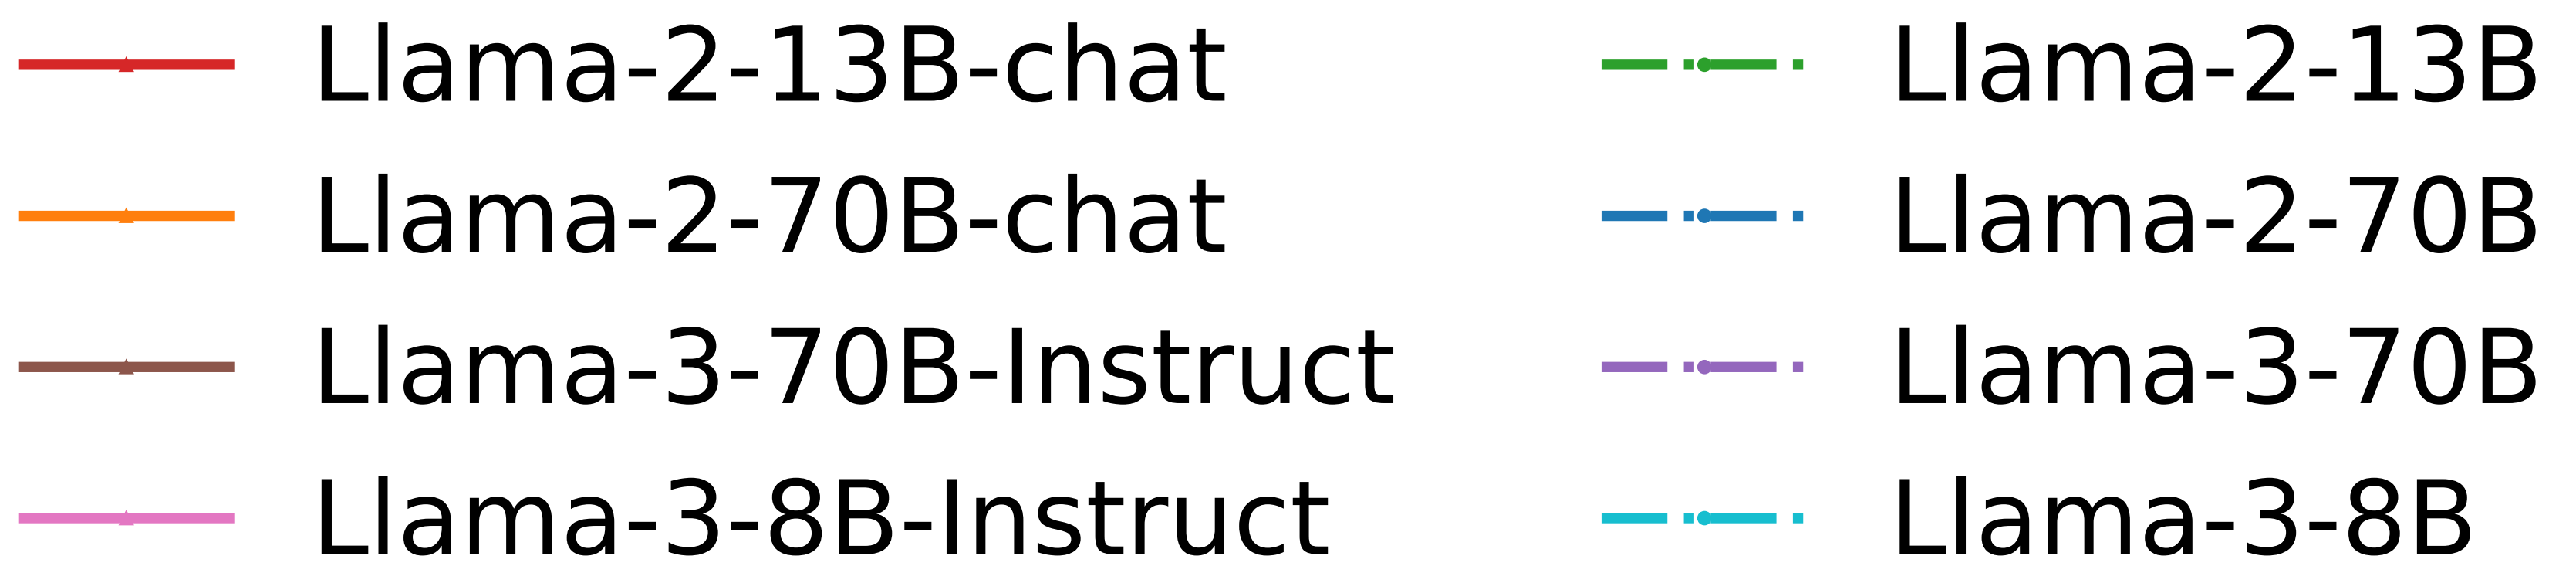

Supplement: supplementary_material [file model_wise_comparison_ebf_bf.pdf › supplementary_materials/bf_output_dynamic/bbcnews_latest/model_wise_comparison_ebf_bf.pdf]

# Llama-2-13B-chat

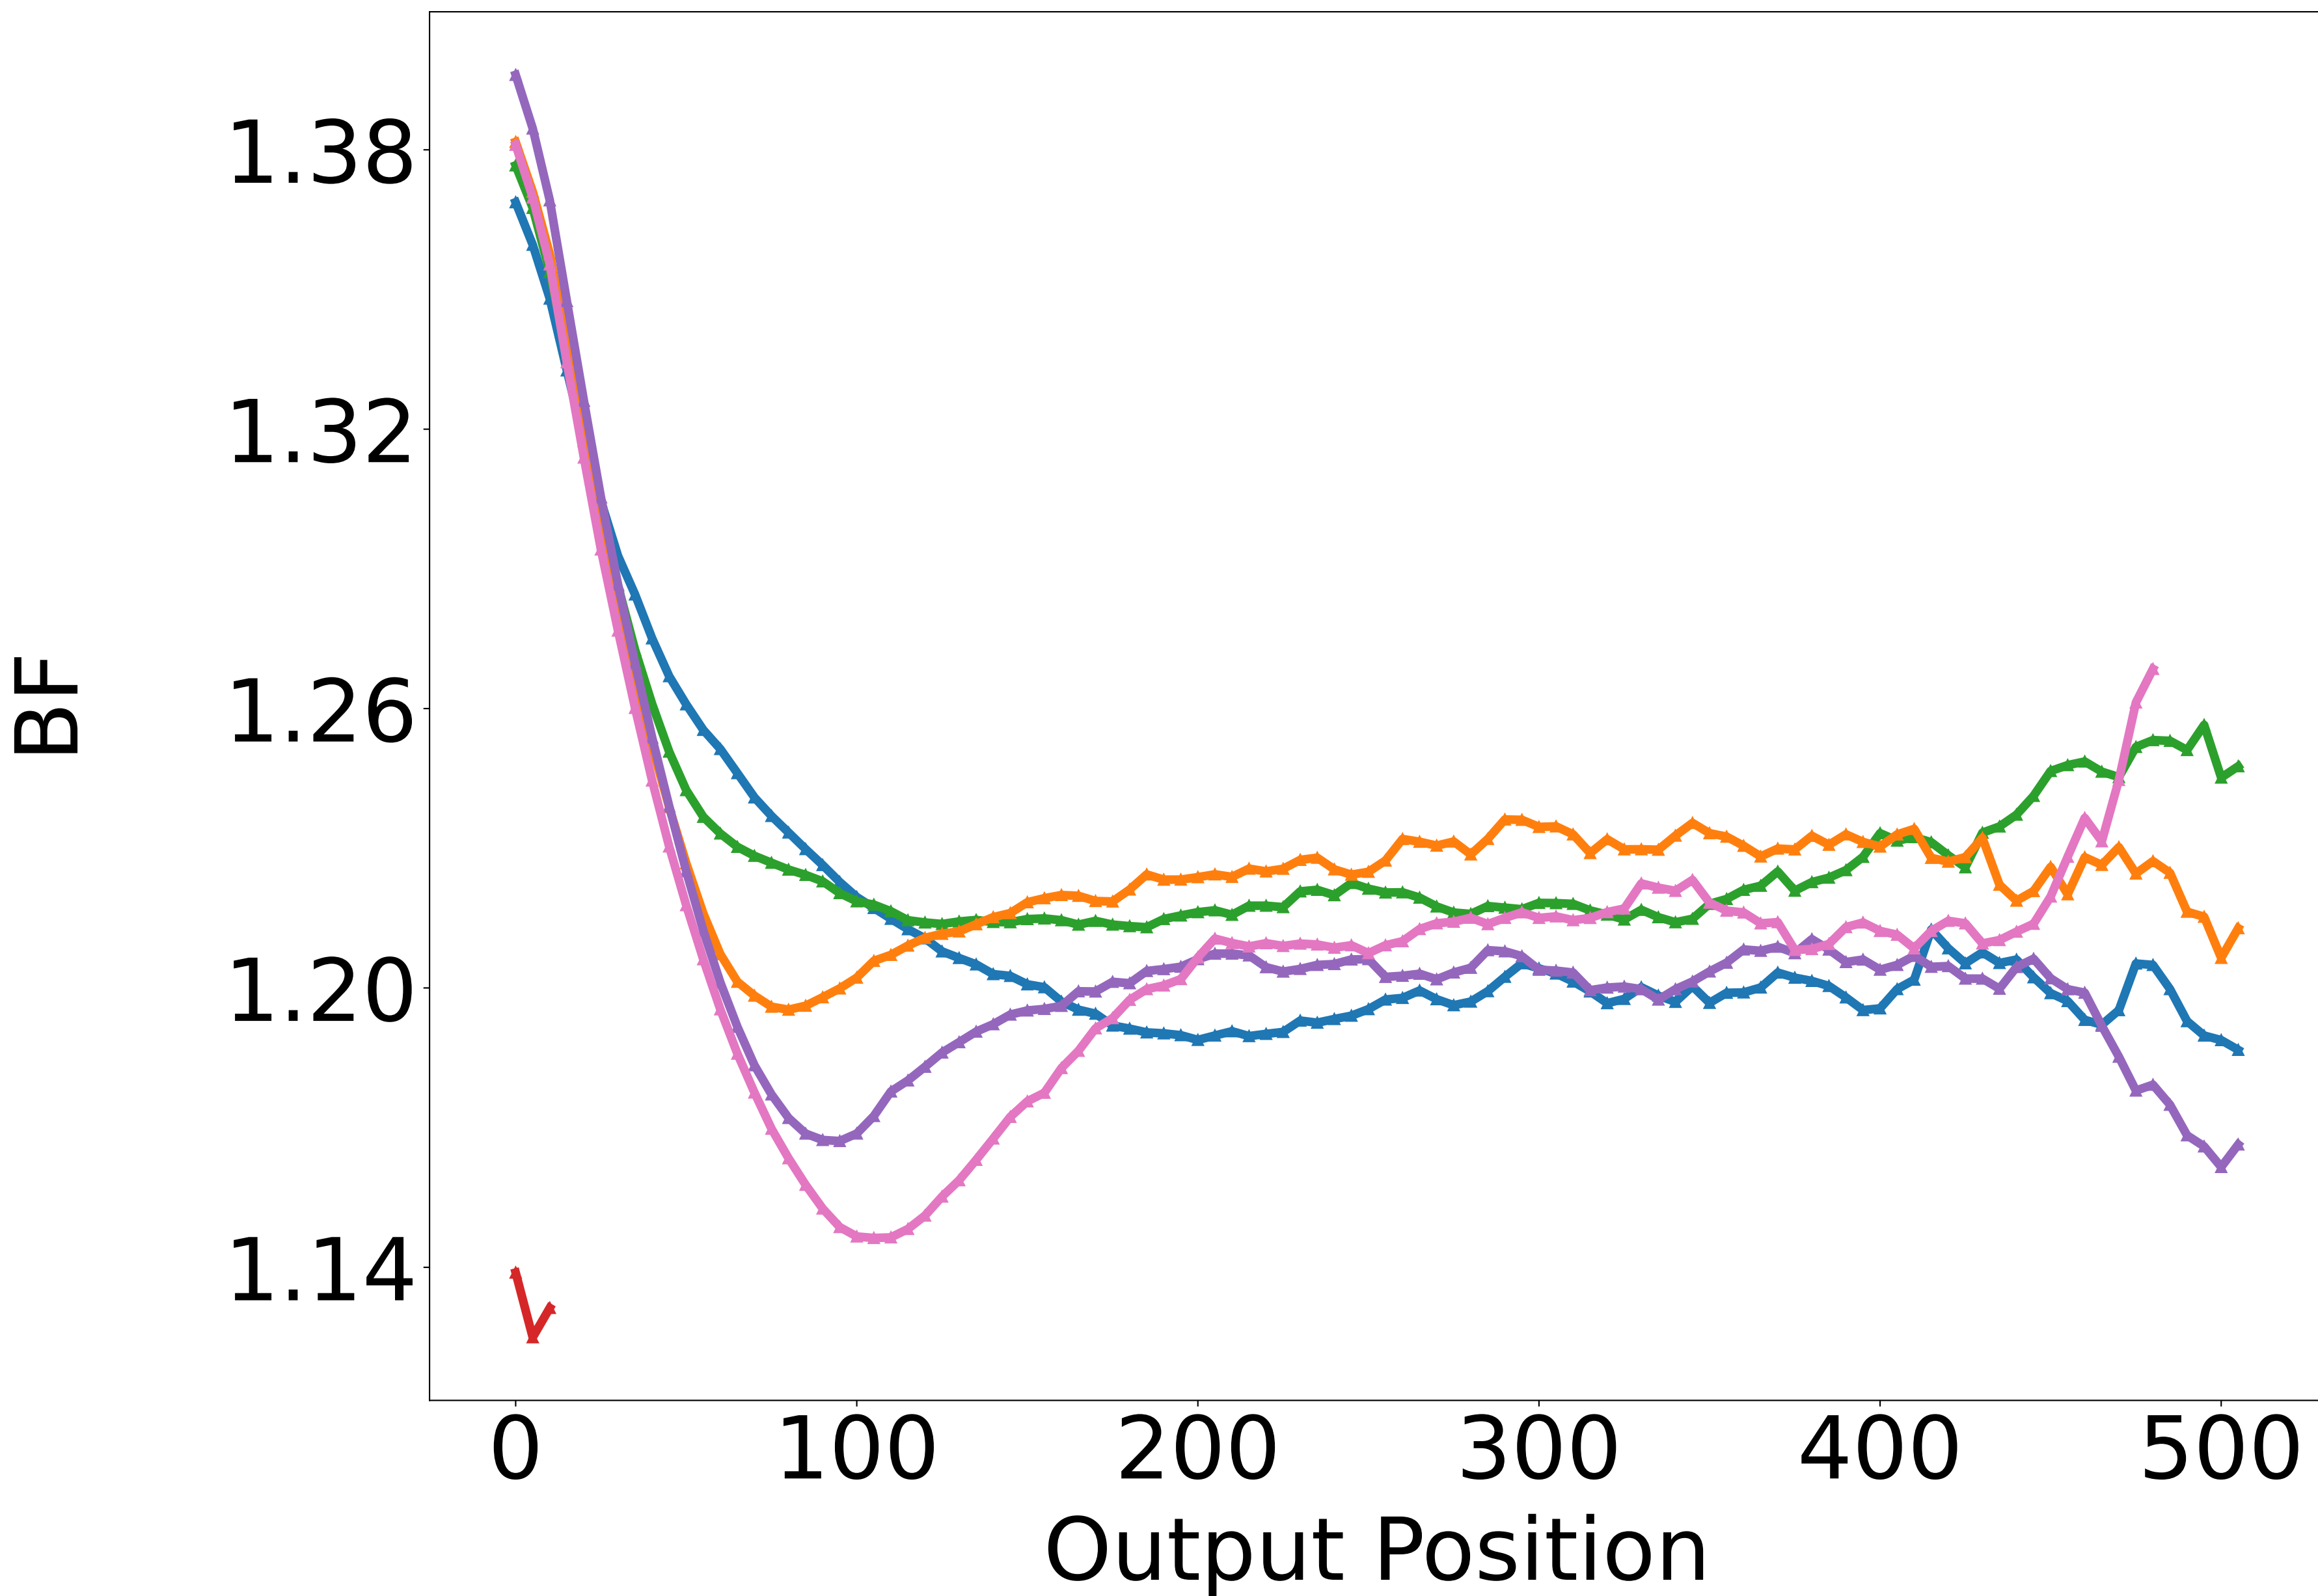

## Prompt Complexity (C)

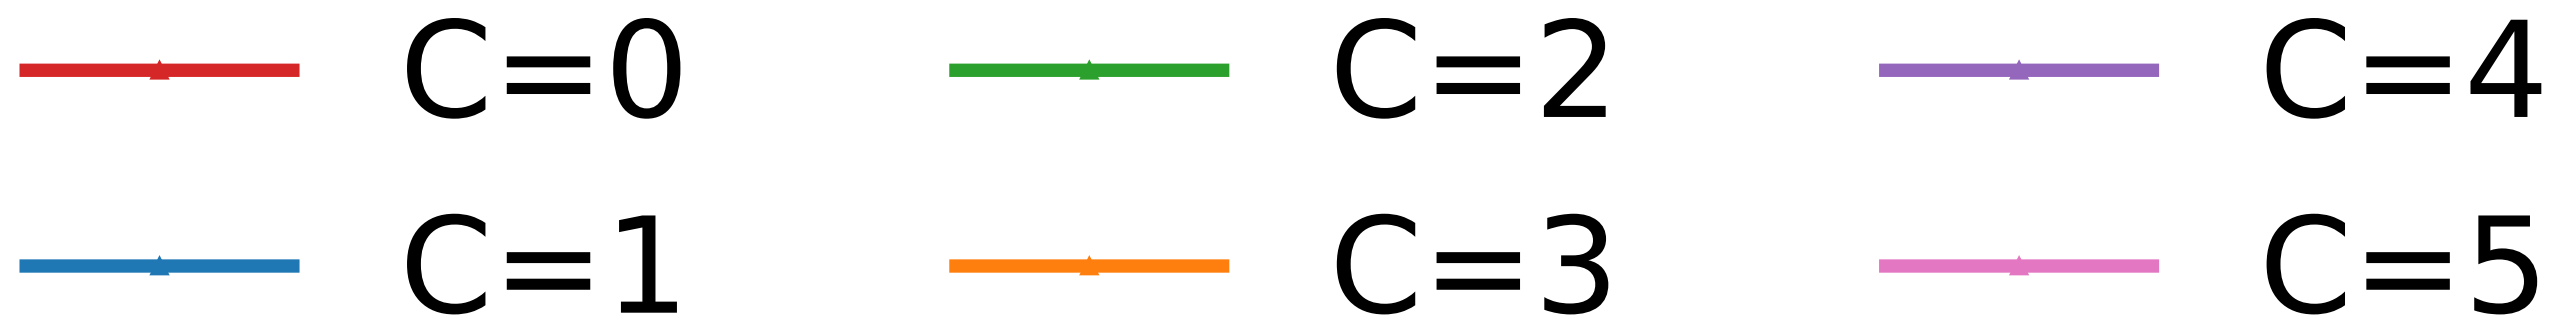

Supplement: supplementary_material [file piecewise_ebf_Llama-2-13B-chat_bf.pdf › supplementary_materials/bf_output_dynamic/bbcnews_latest/piecewise_ebf_Llama-2-13B-chat_bf.pdf]

# Llama-2-13B

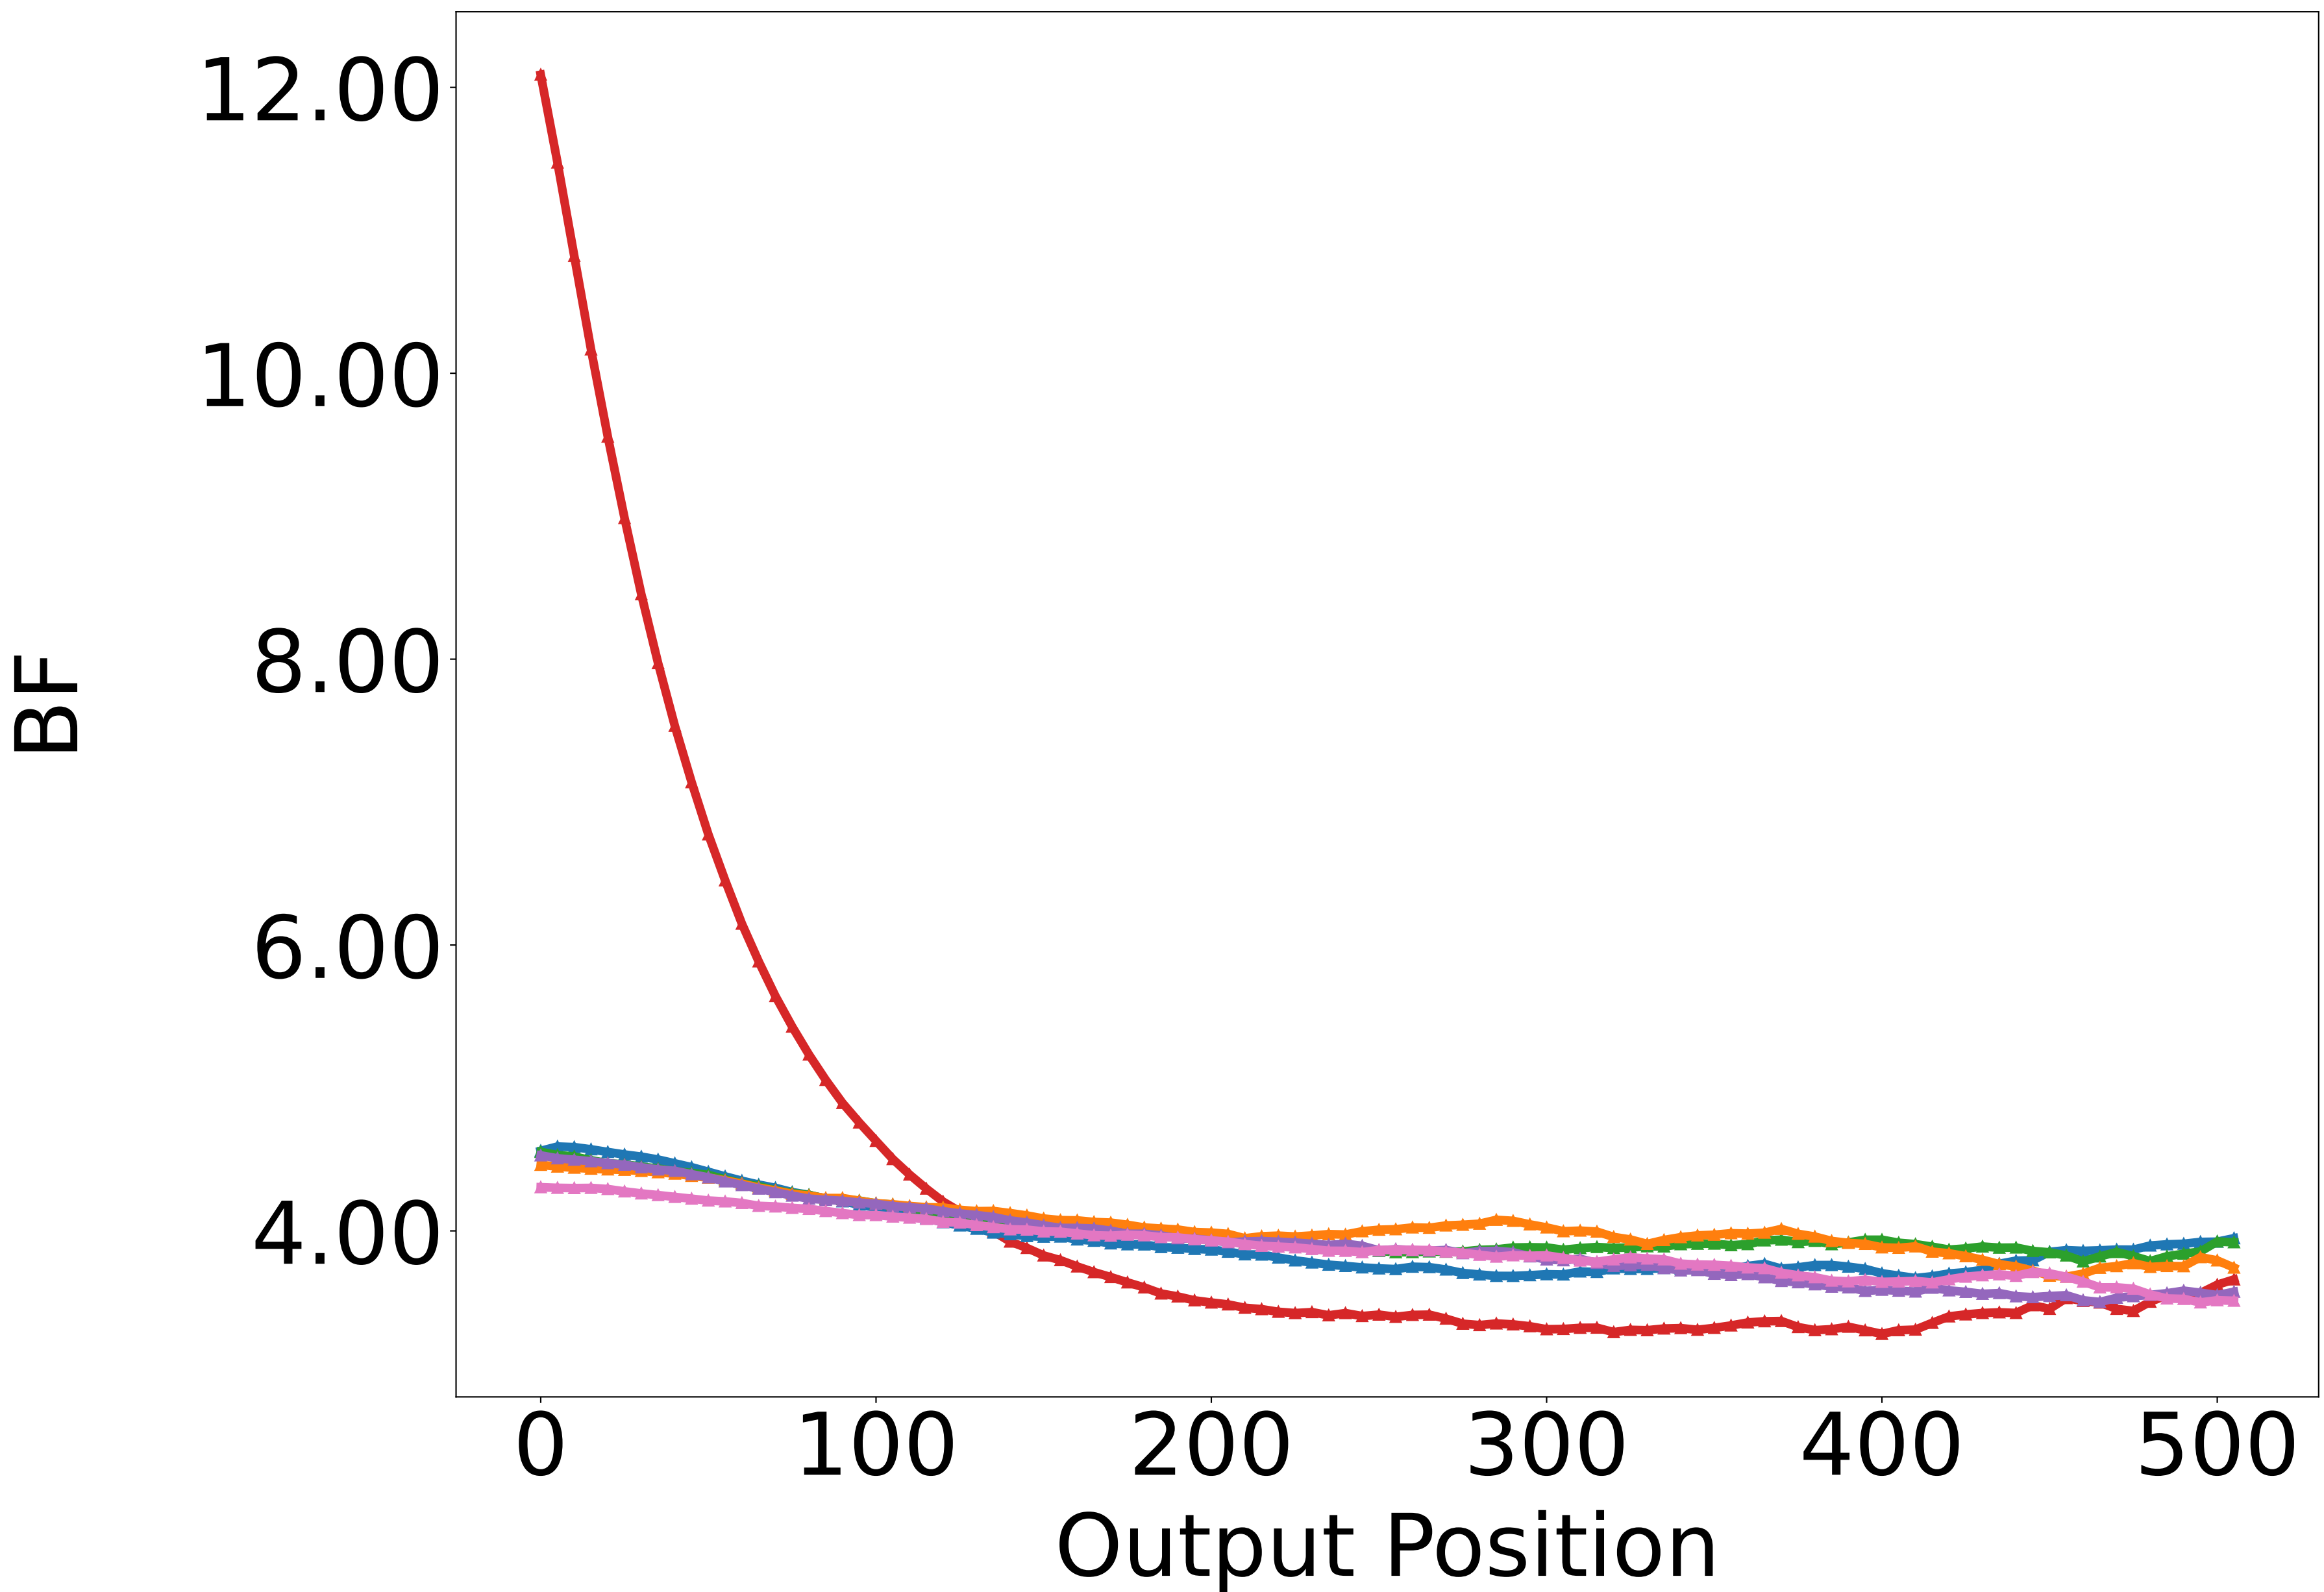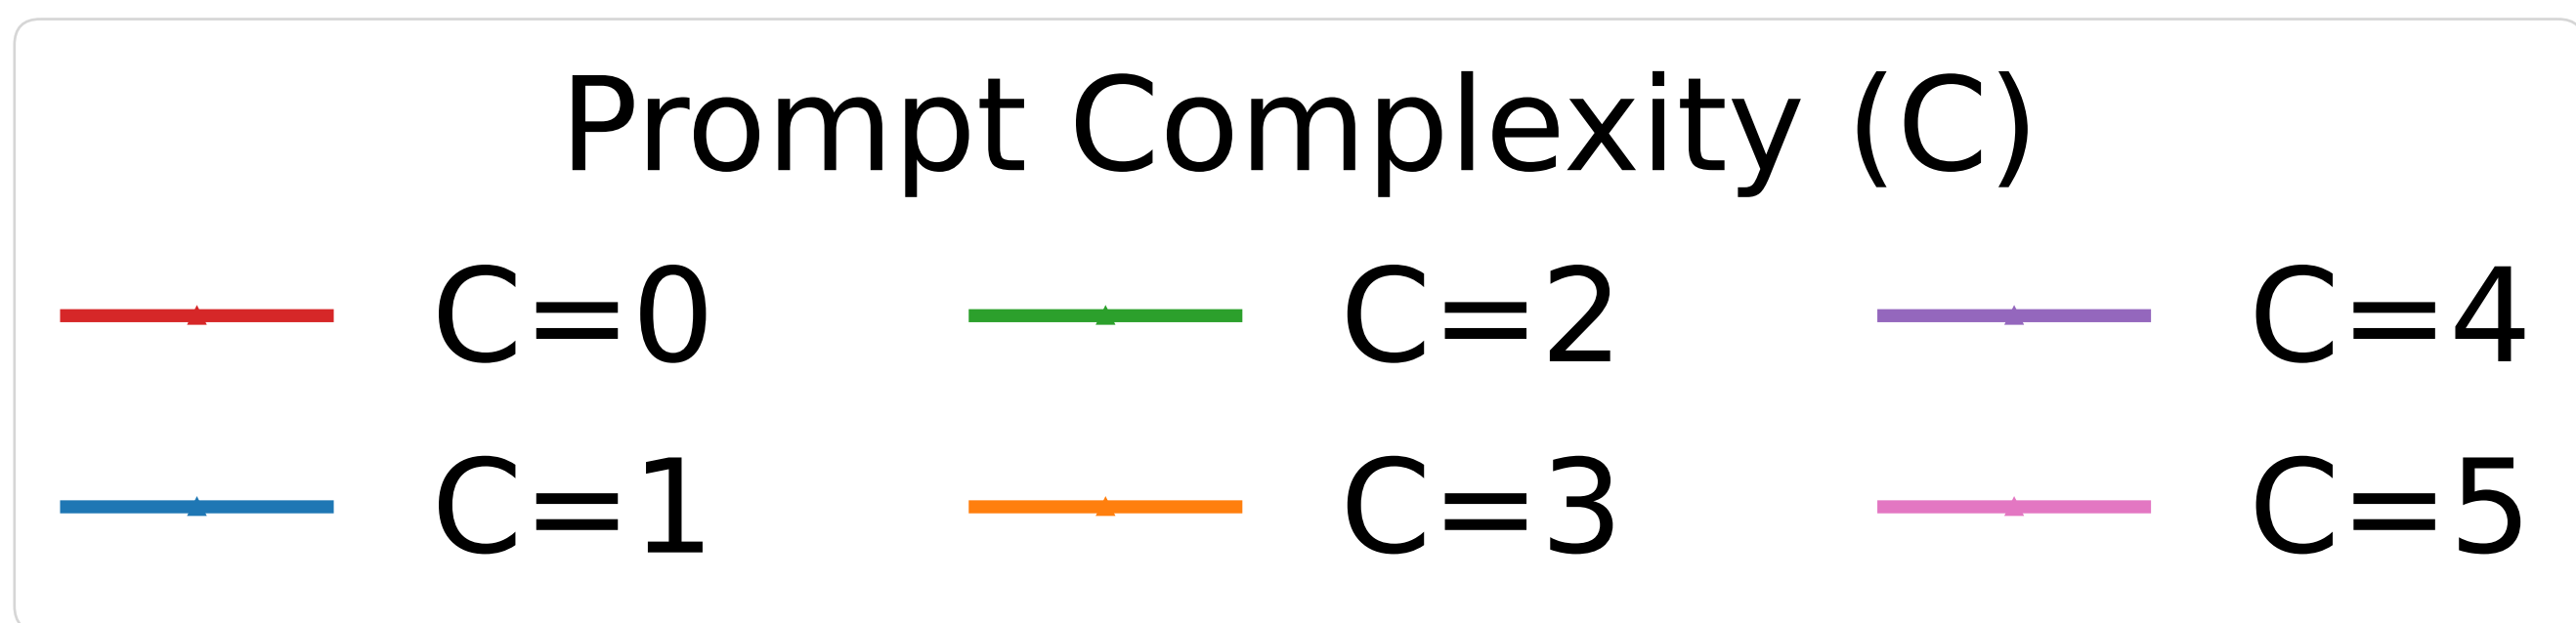

Supplement: supplementary_material [file piecewise_ebf_Llama-2-13B_bf.pdf › supplementary_materials/bf_output_dynamic/bbcnews_latest/piecewise_ebf_Llama-2-13B_bf.pdf]

# Llama-2-70B-chat

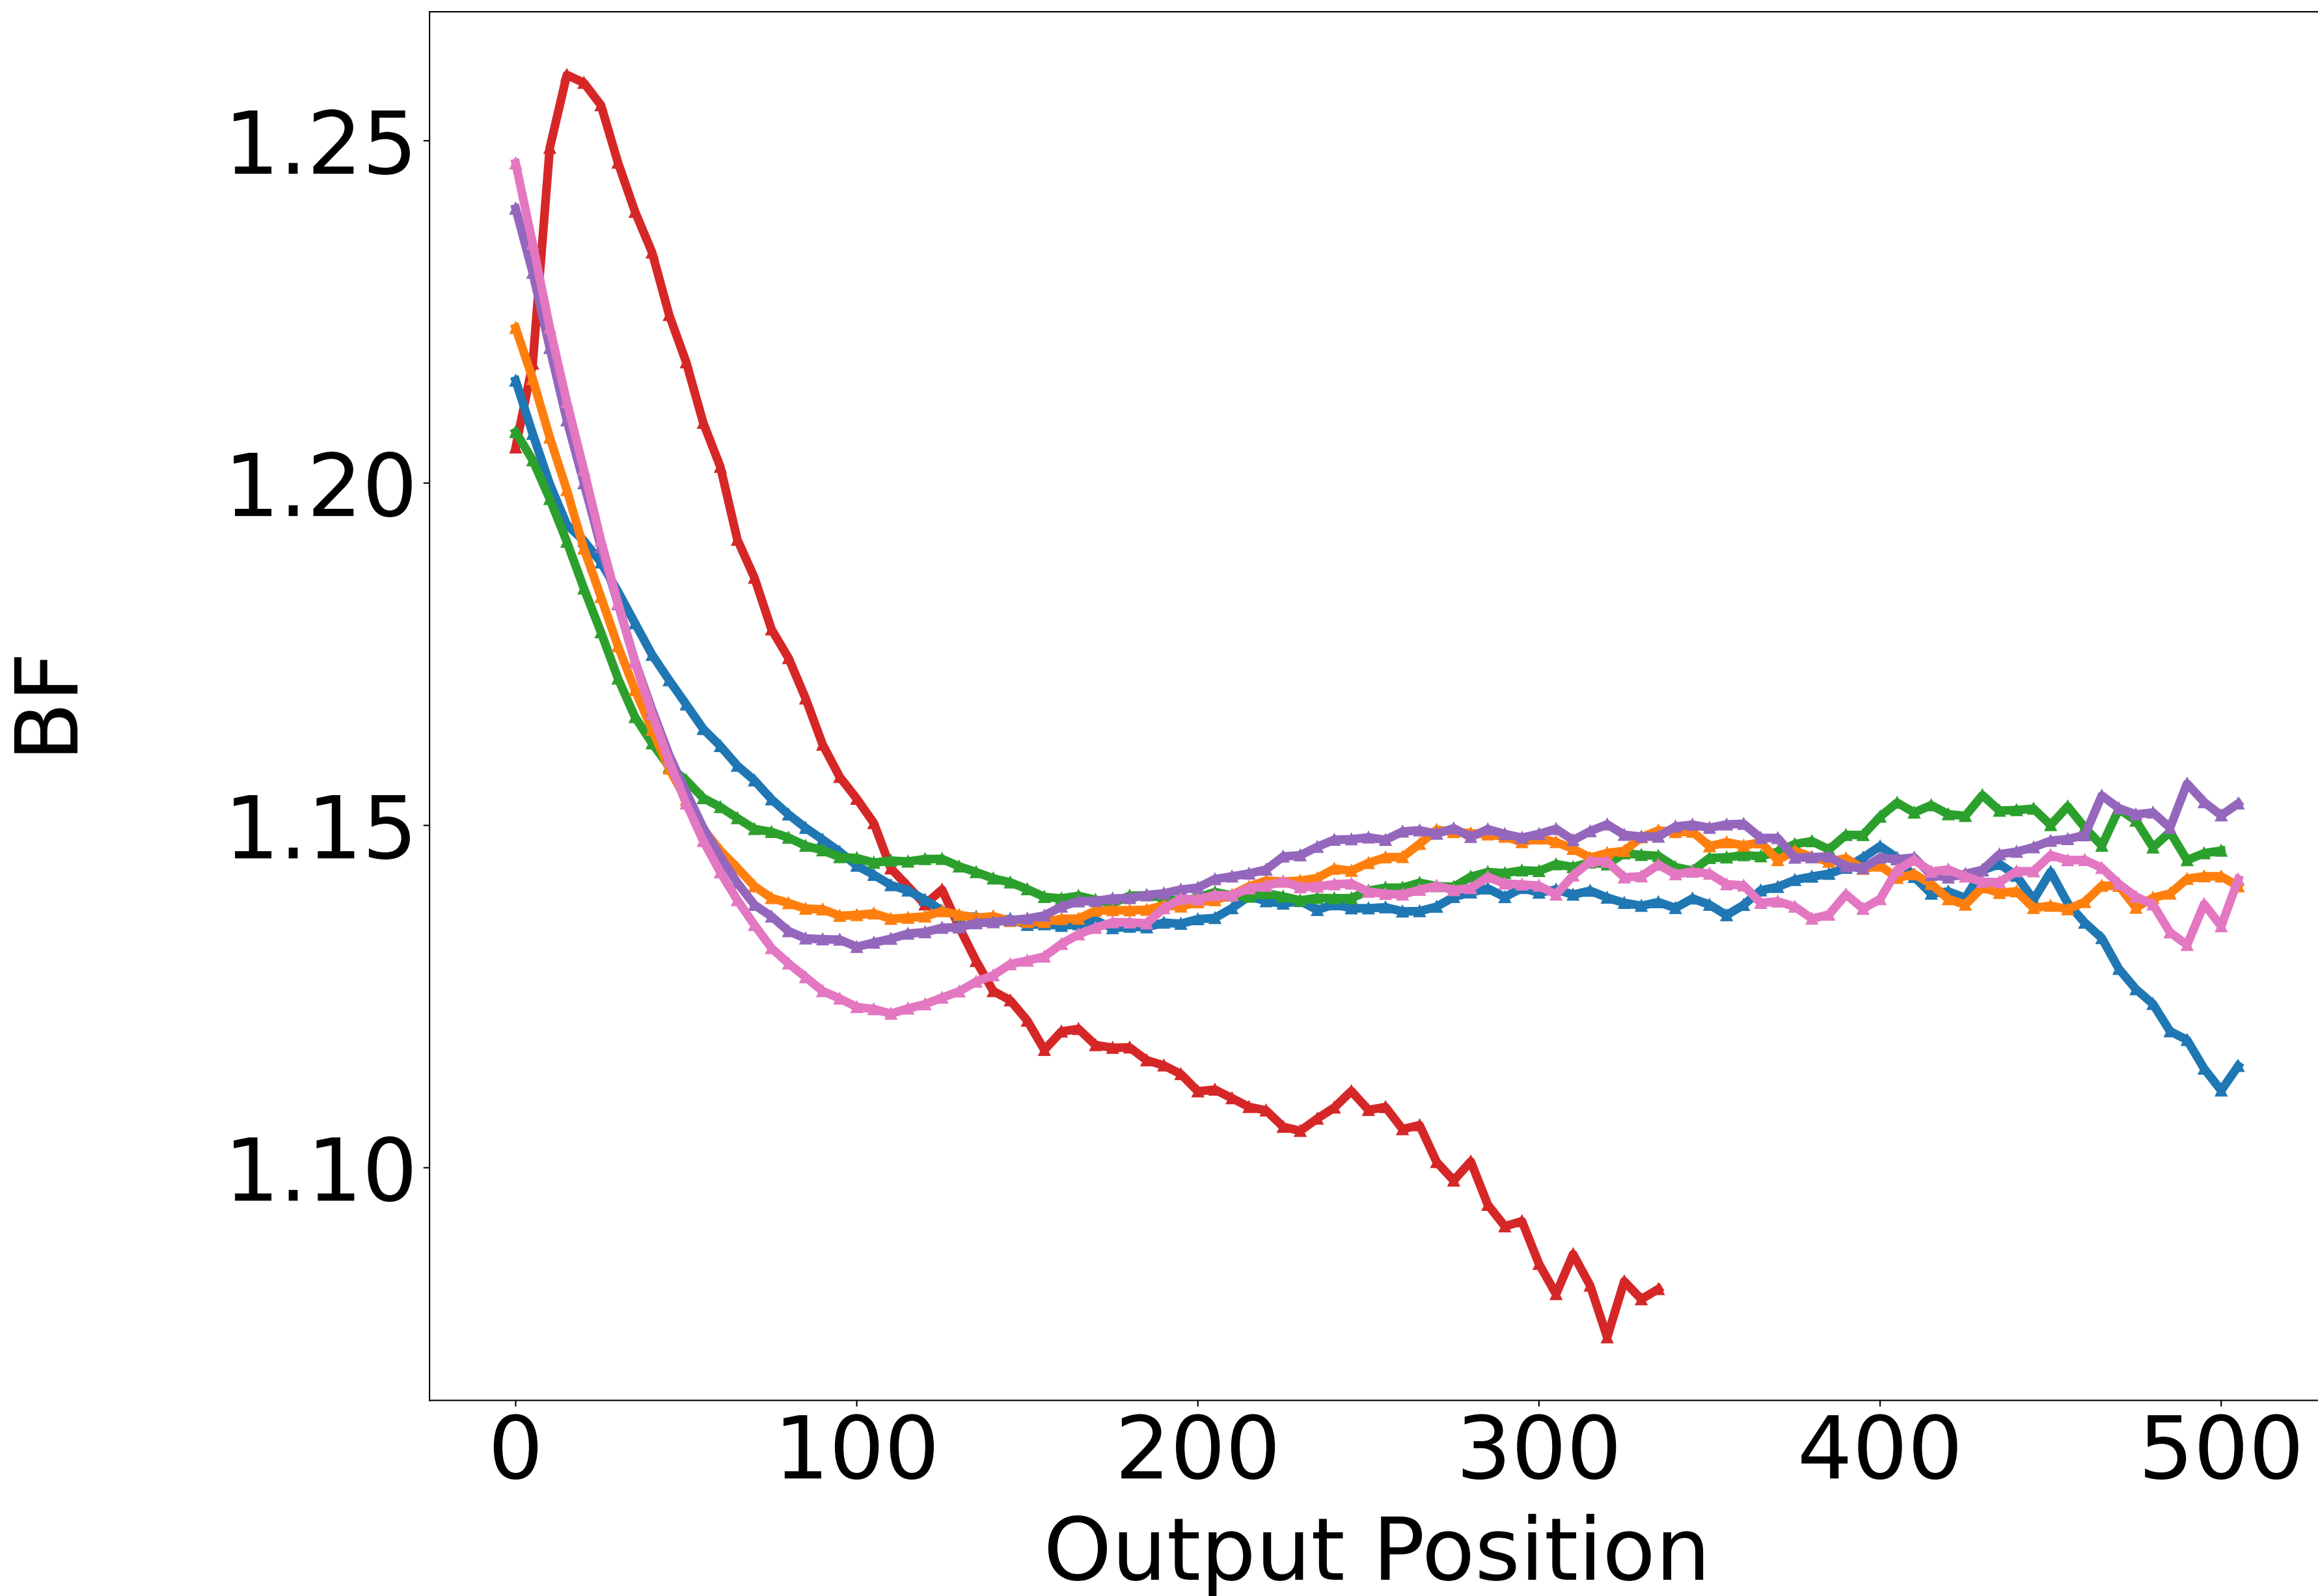

## Prompt Complexity (C)

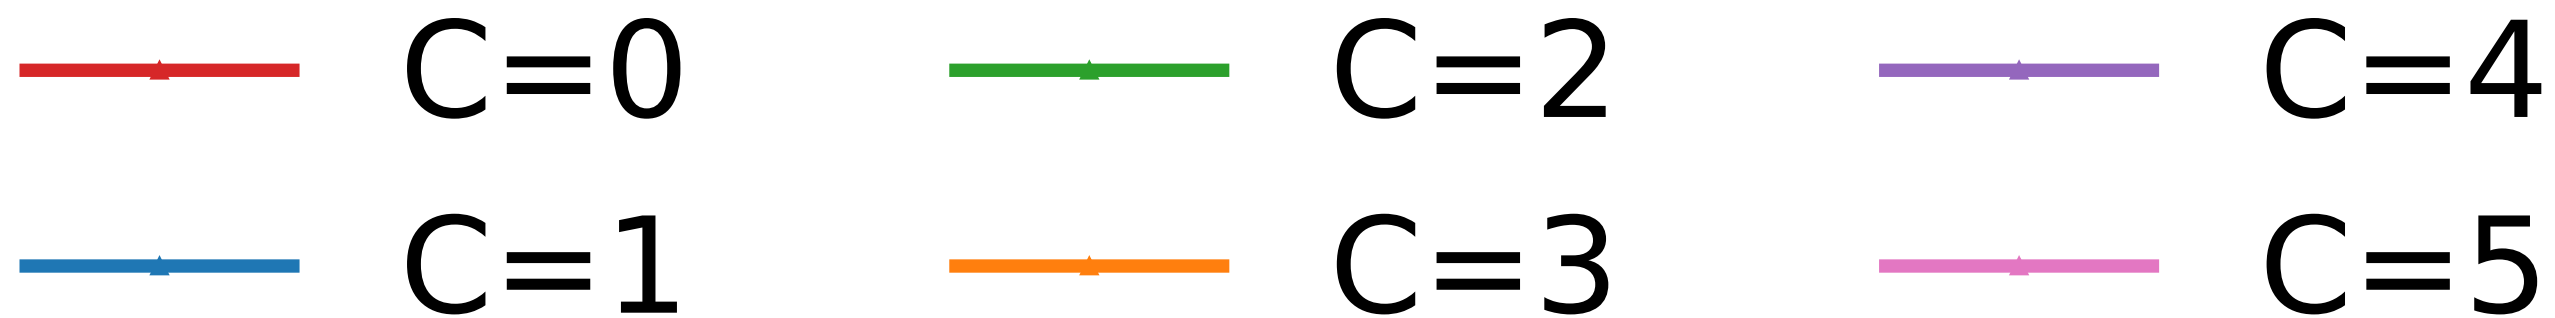

Supplement: supplementary_material [file piecewise_ebf_Llama-2-70B-chat_bf.pdf › supplementary_materials/bf_output_dynamic/bbcnews_latest/piecewise_ebf_Llama-2-70B-chat_bf.pdf]

# Llama-2-70B

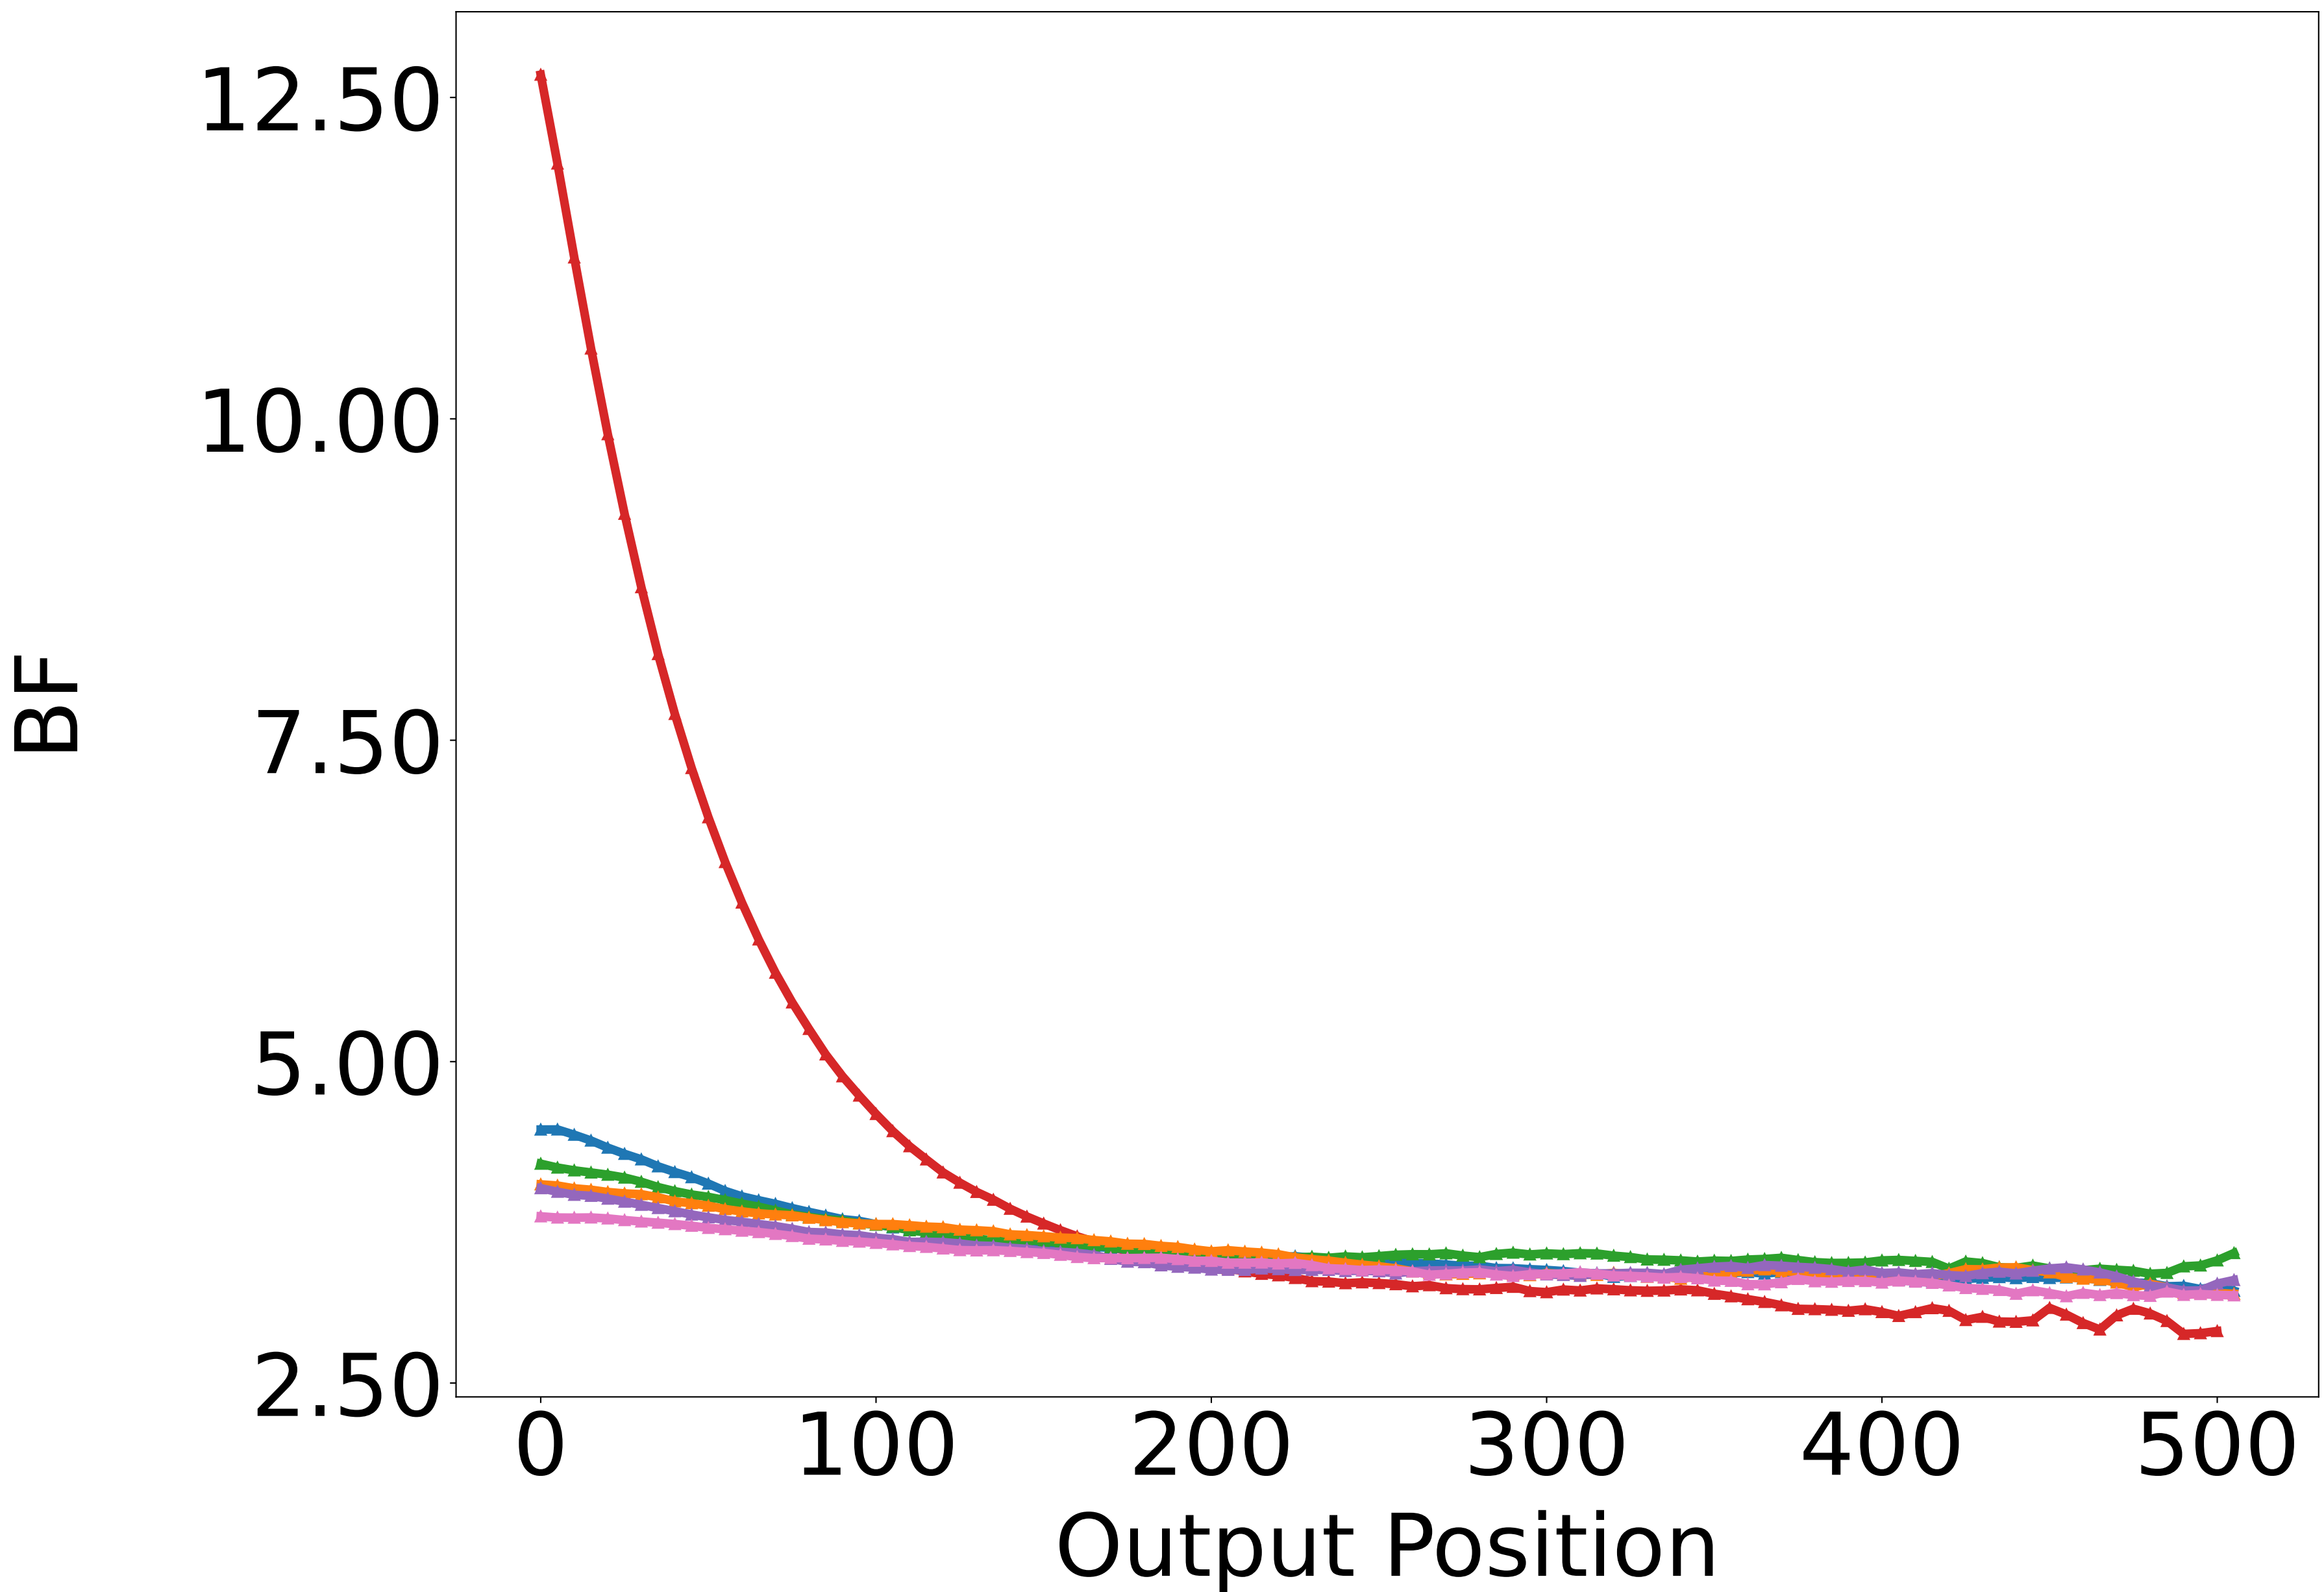

## Prompt Complexity (C)

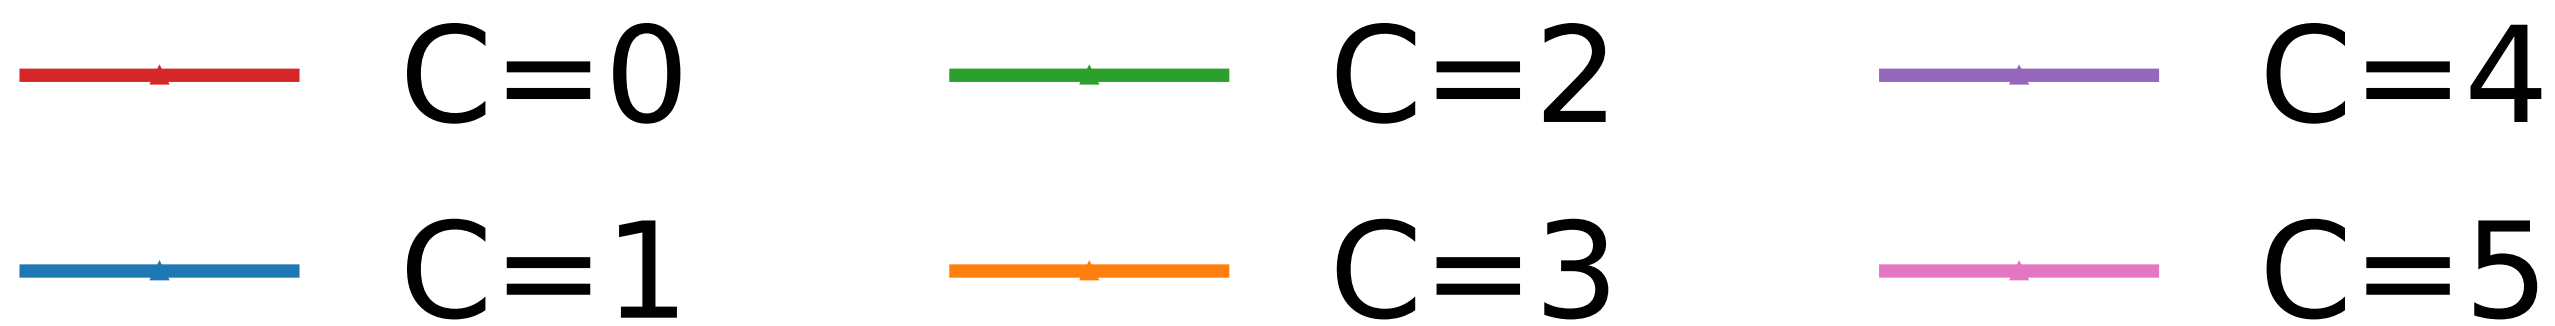

Supplement: supplementary_material [file piecewise_ebf_Llama-2-70B_bf.pdf › supplementary_materials/bf_output_dynamic/bbcnews_latest/piecewise_ebf_Llama-2-70B_bf.pdf]

# Llama-3-70B-Instruct

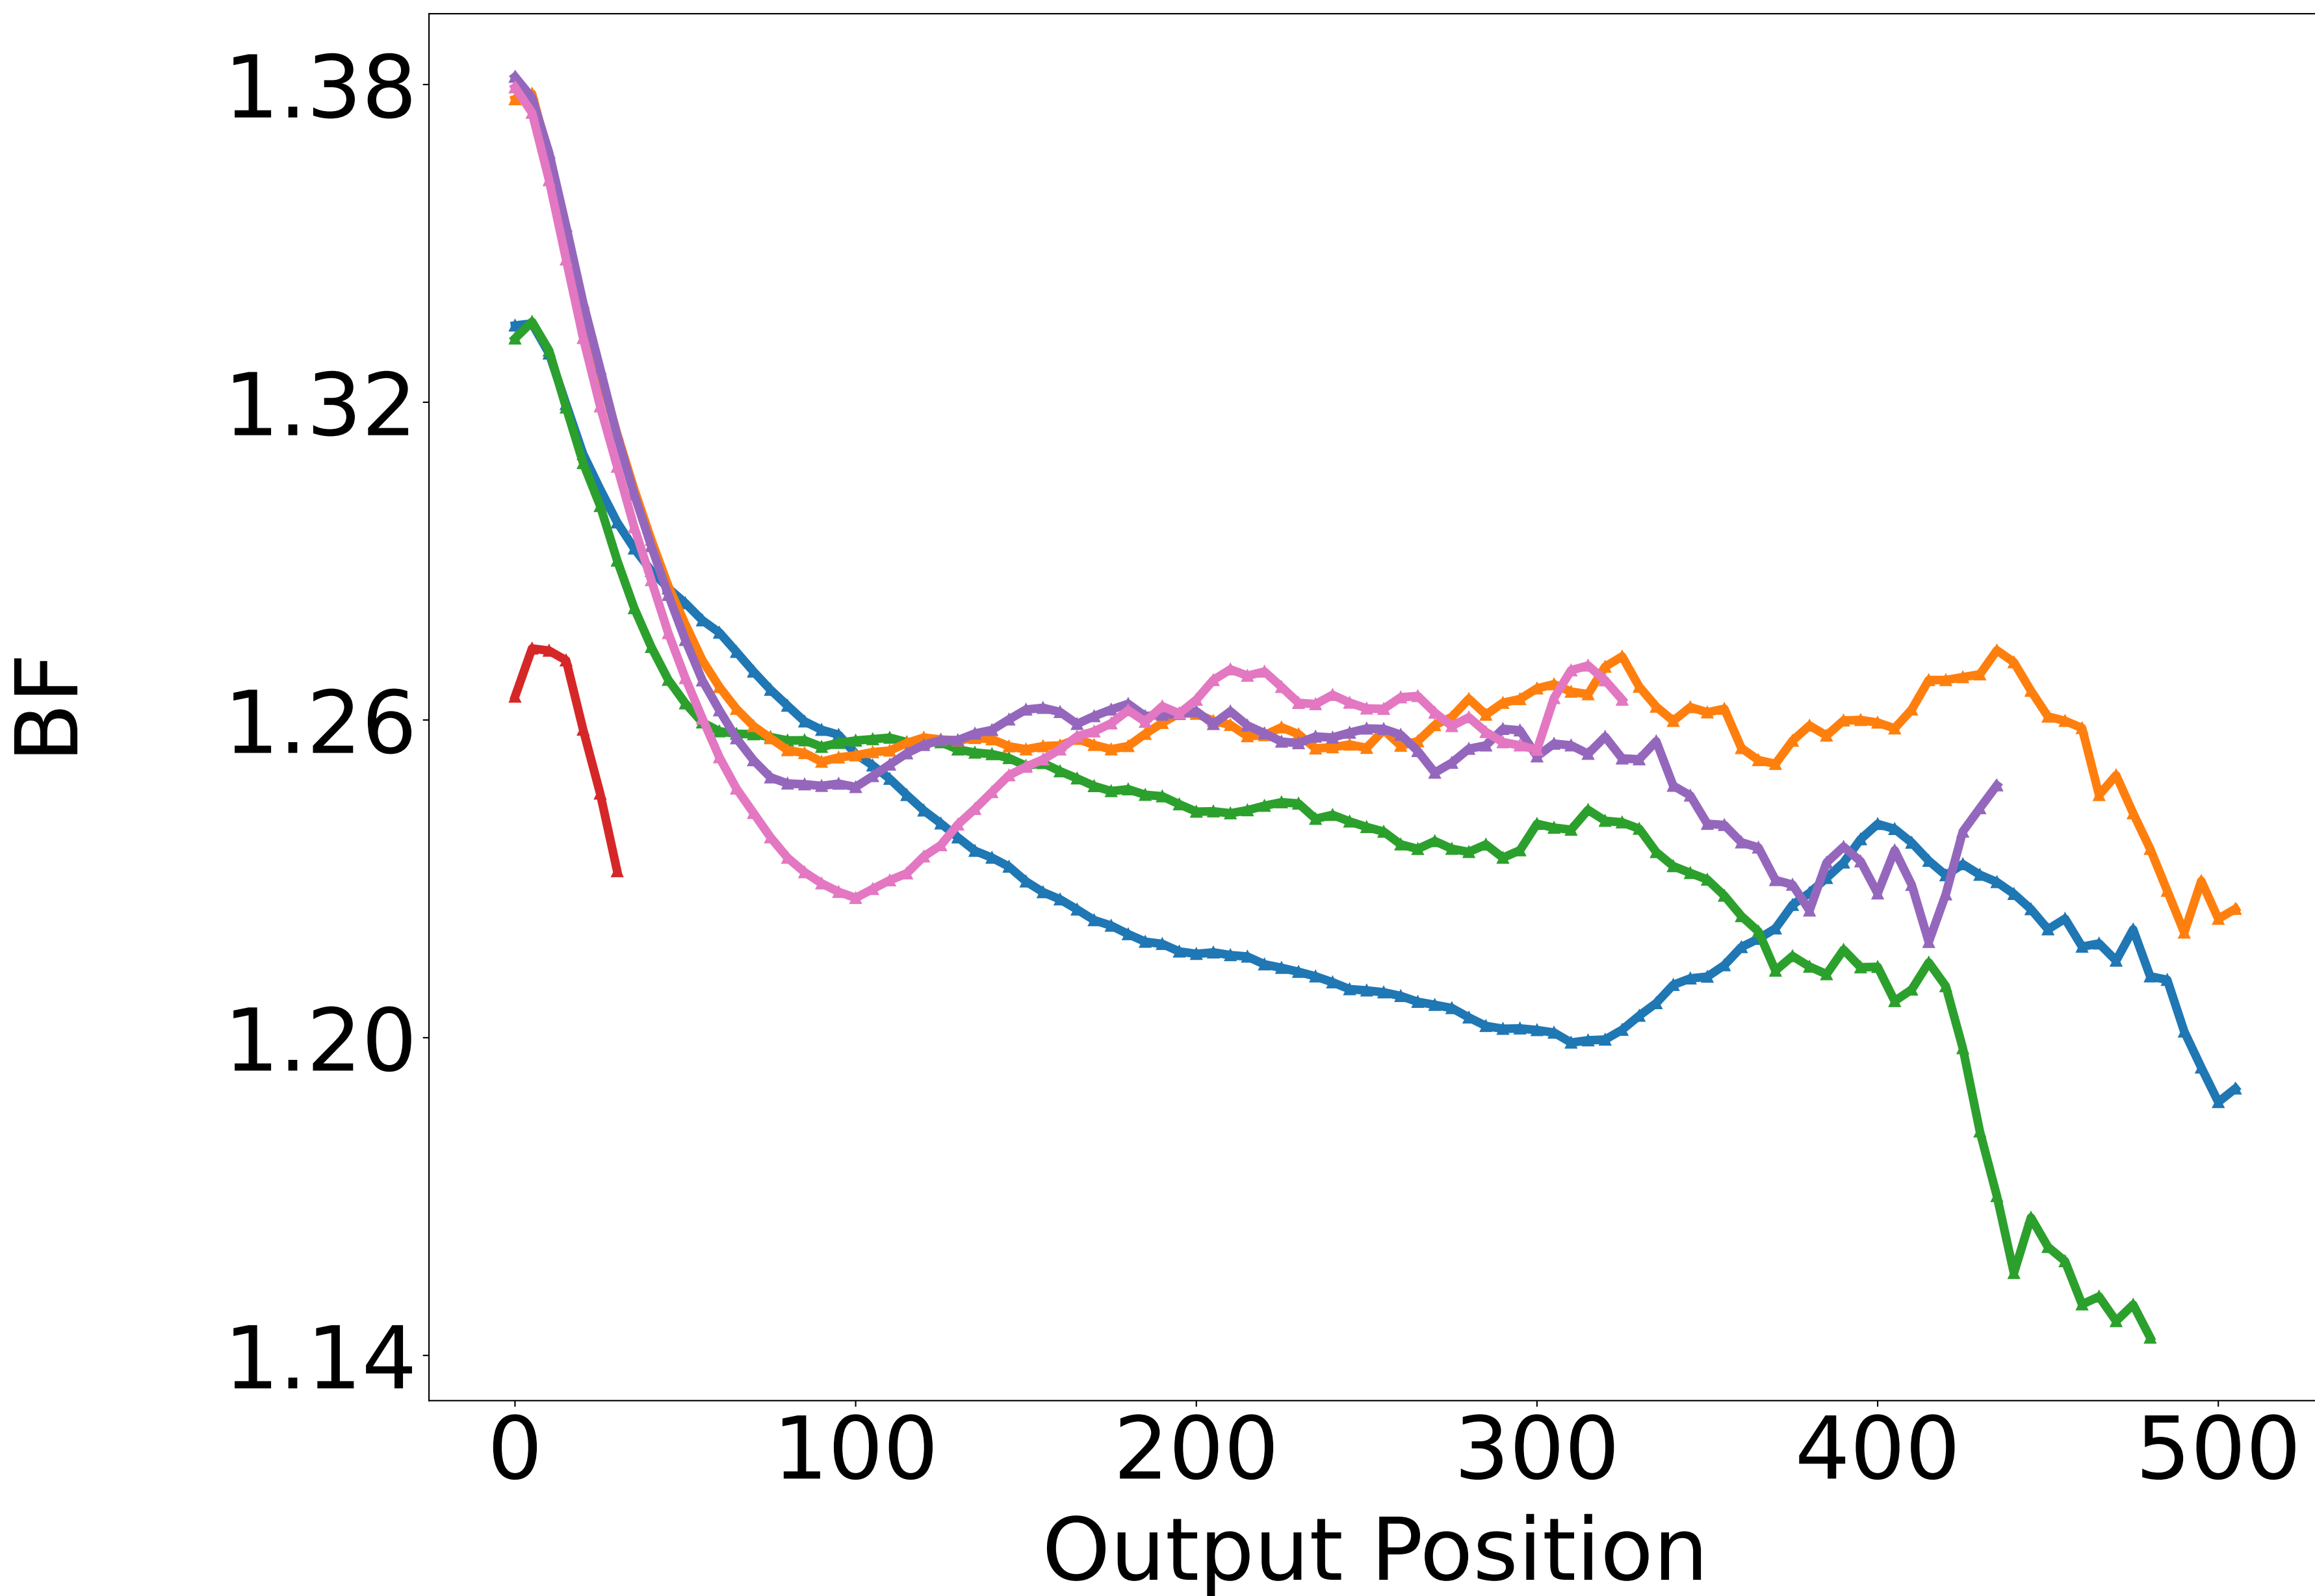

## Prompt Complexity (C)

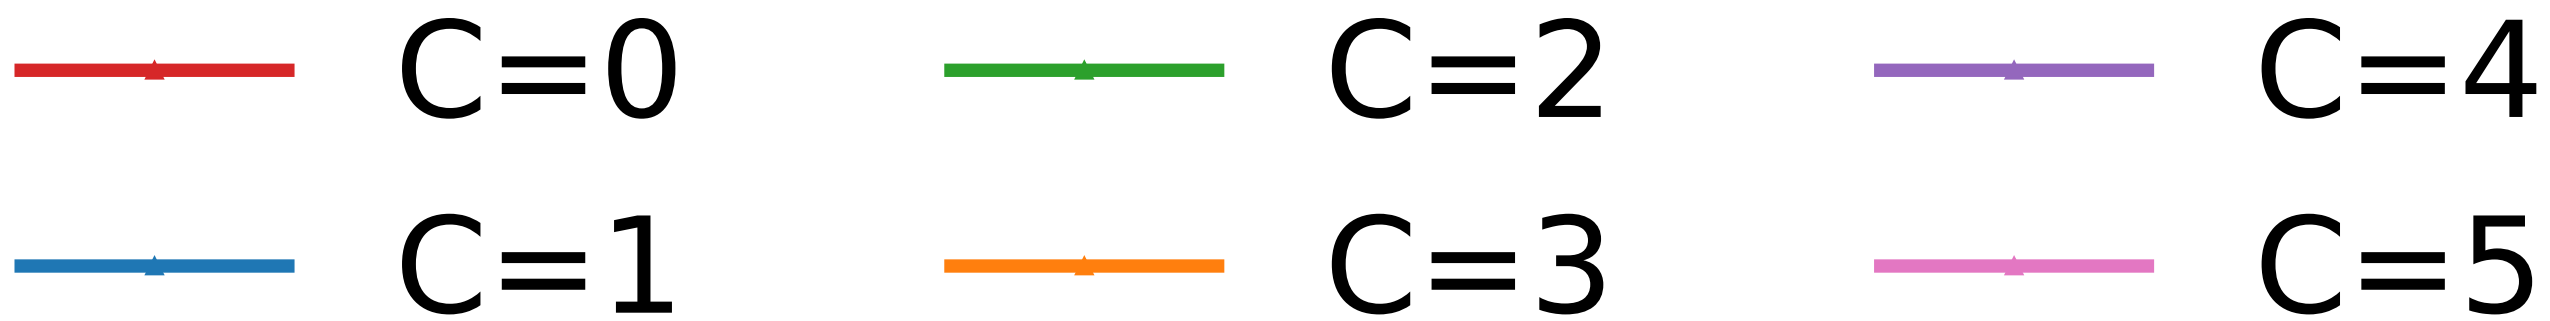

Supplement: supplementary_material [file piecewise_ebf_Llama-3-70B-Instruct_bf.pdf › supplementary_materials/bf_output_dynamic/bbcnews_latest/piecewise_ebf_Llama-3-70B-Instruct_bf.pdf]

# Llama-3-70B

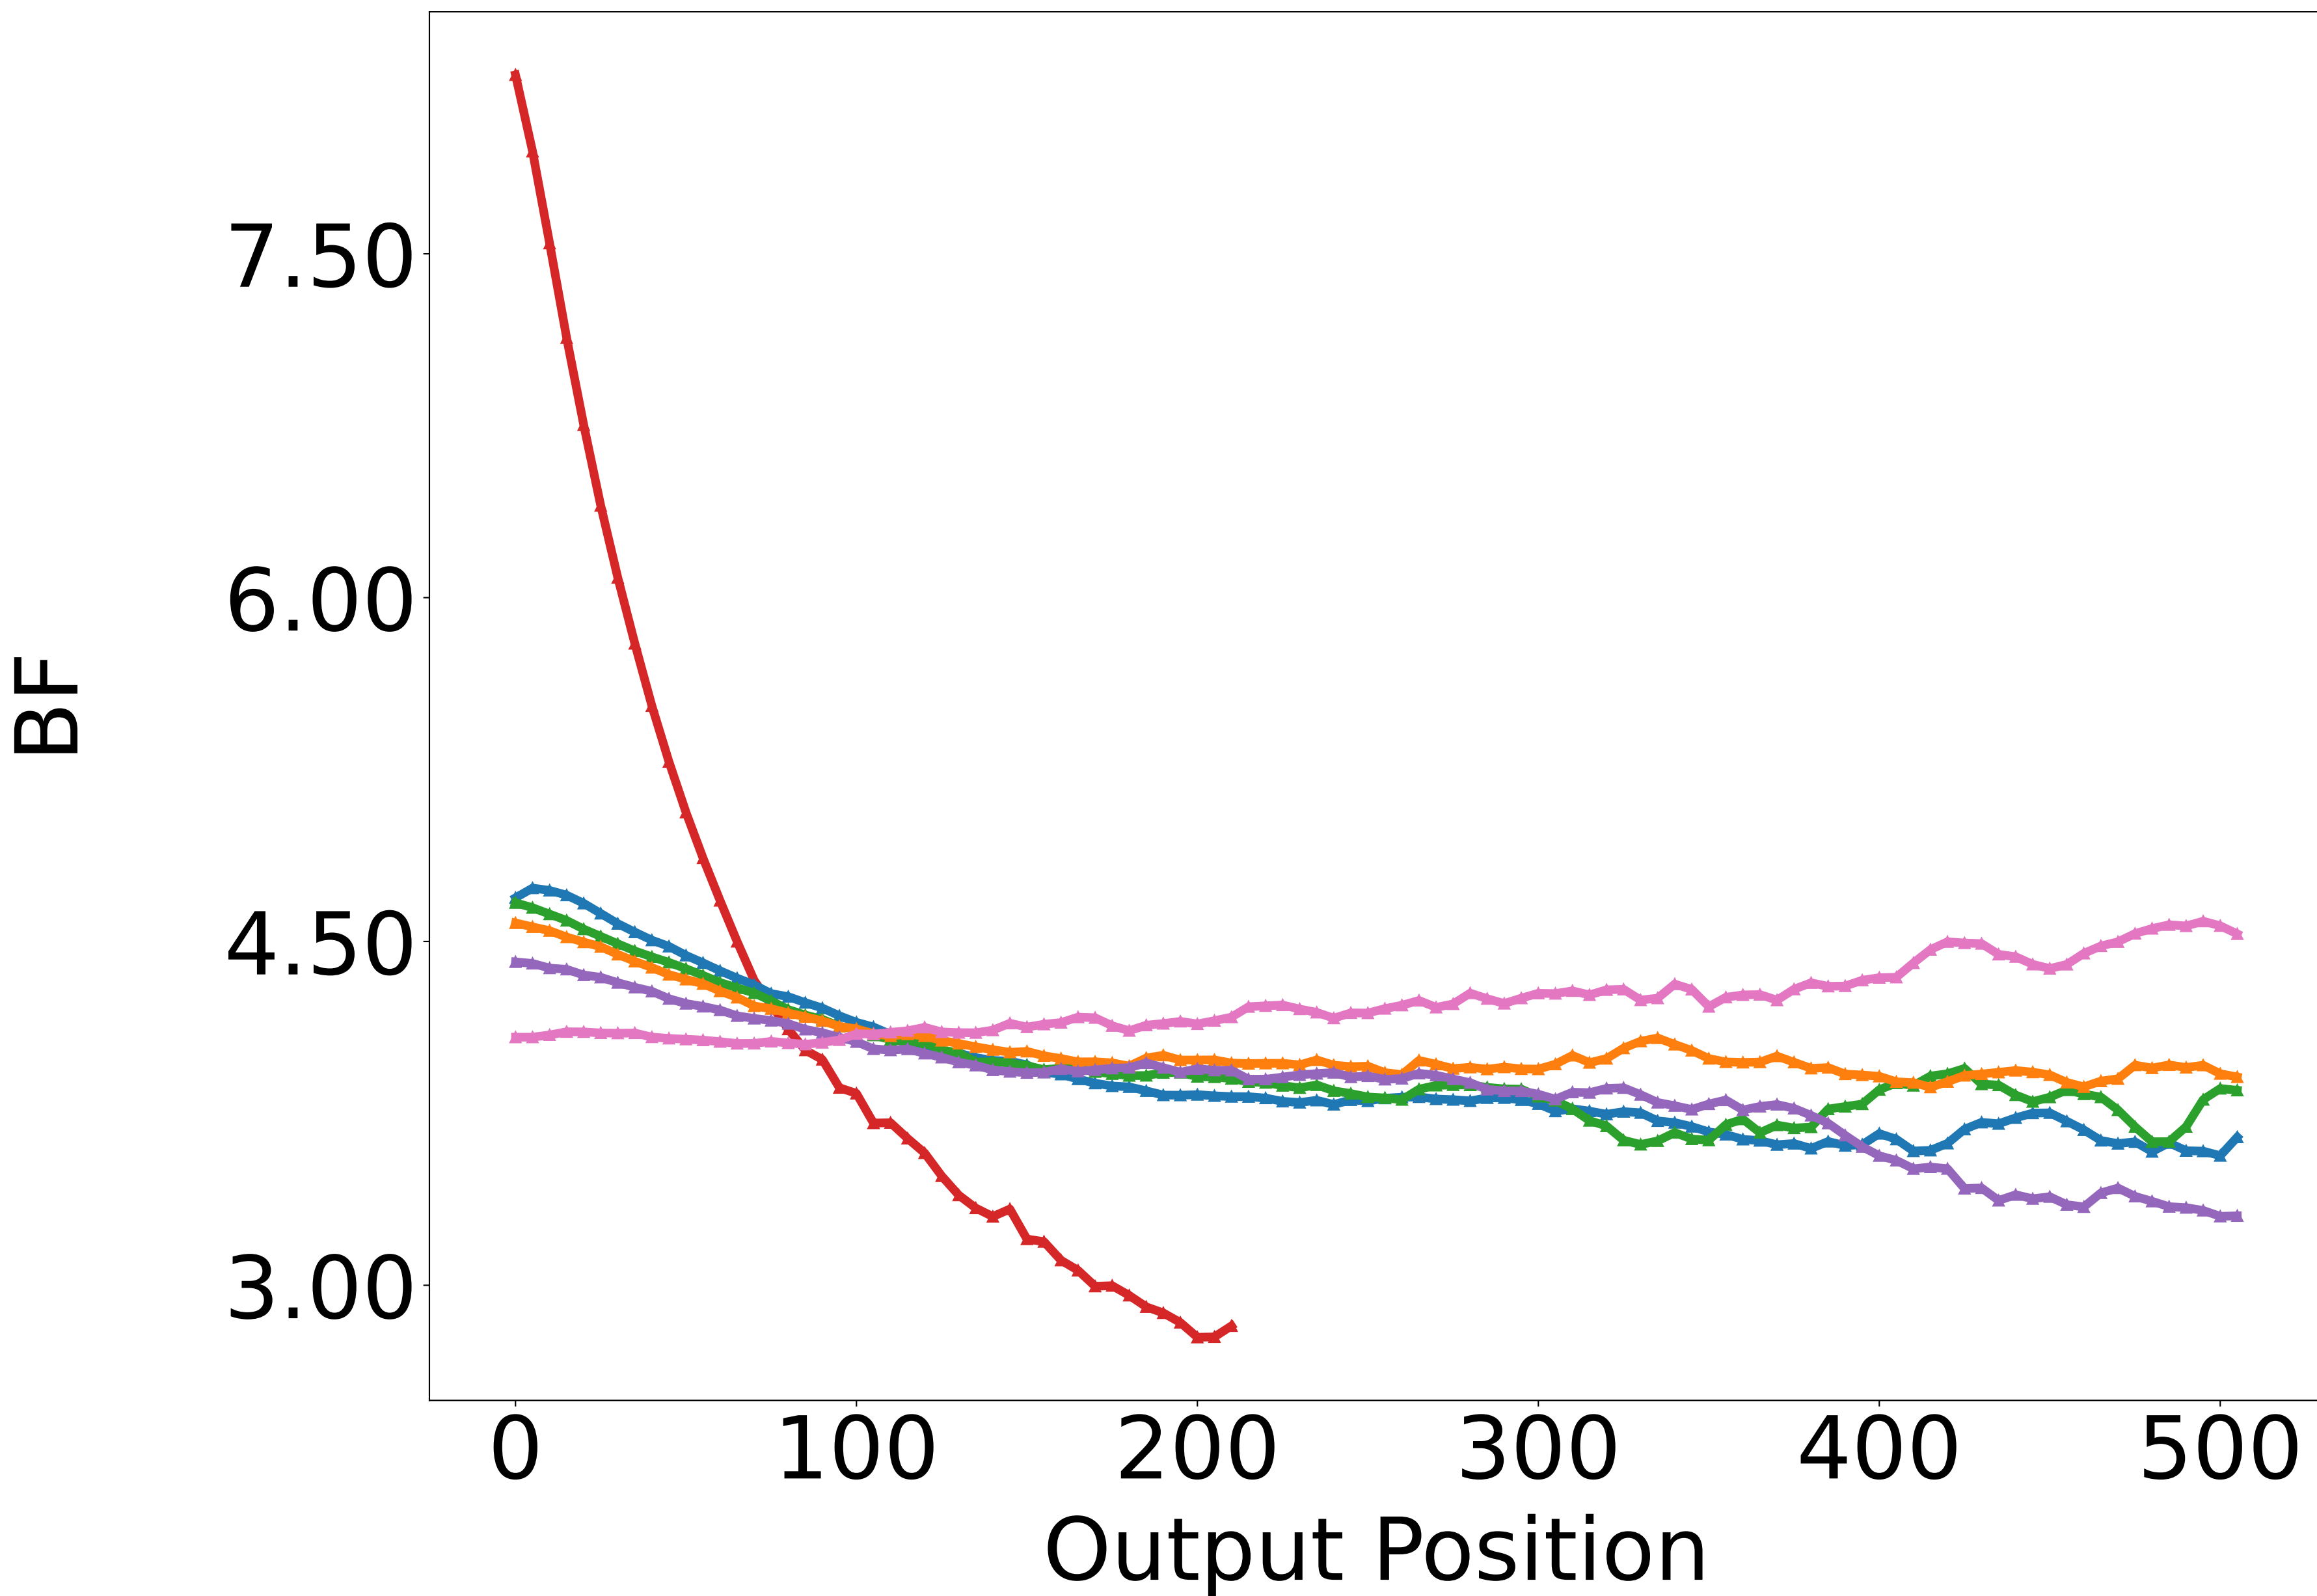

## Prompt Complexity (C)

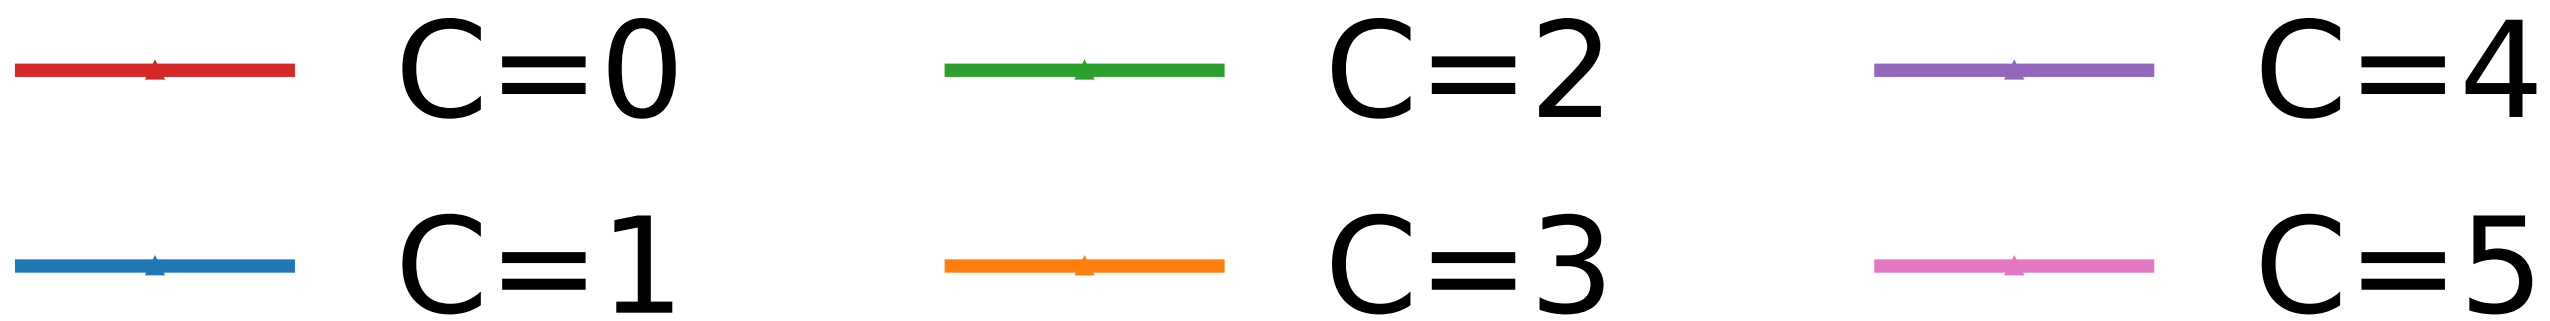

Supplement: supplementary_material [file piecewise_ebf_Llama-3-70B_bf.pdf › supplementary_materials/bf_output_dynamic/bbcnews_latest/piecewise_ebf_Llama-3-70B_bf.pdf]

# Llama-3-8B-Instruct

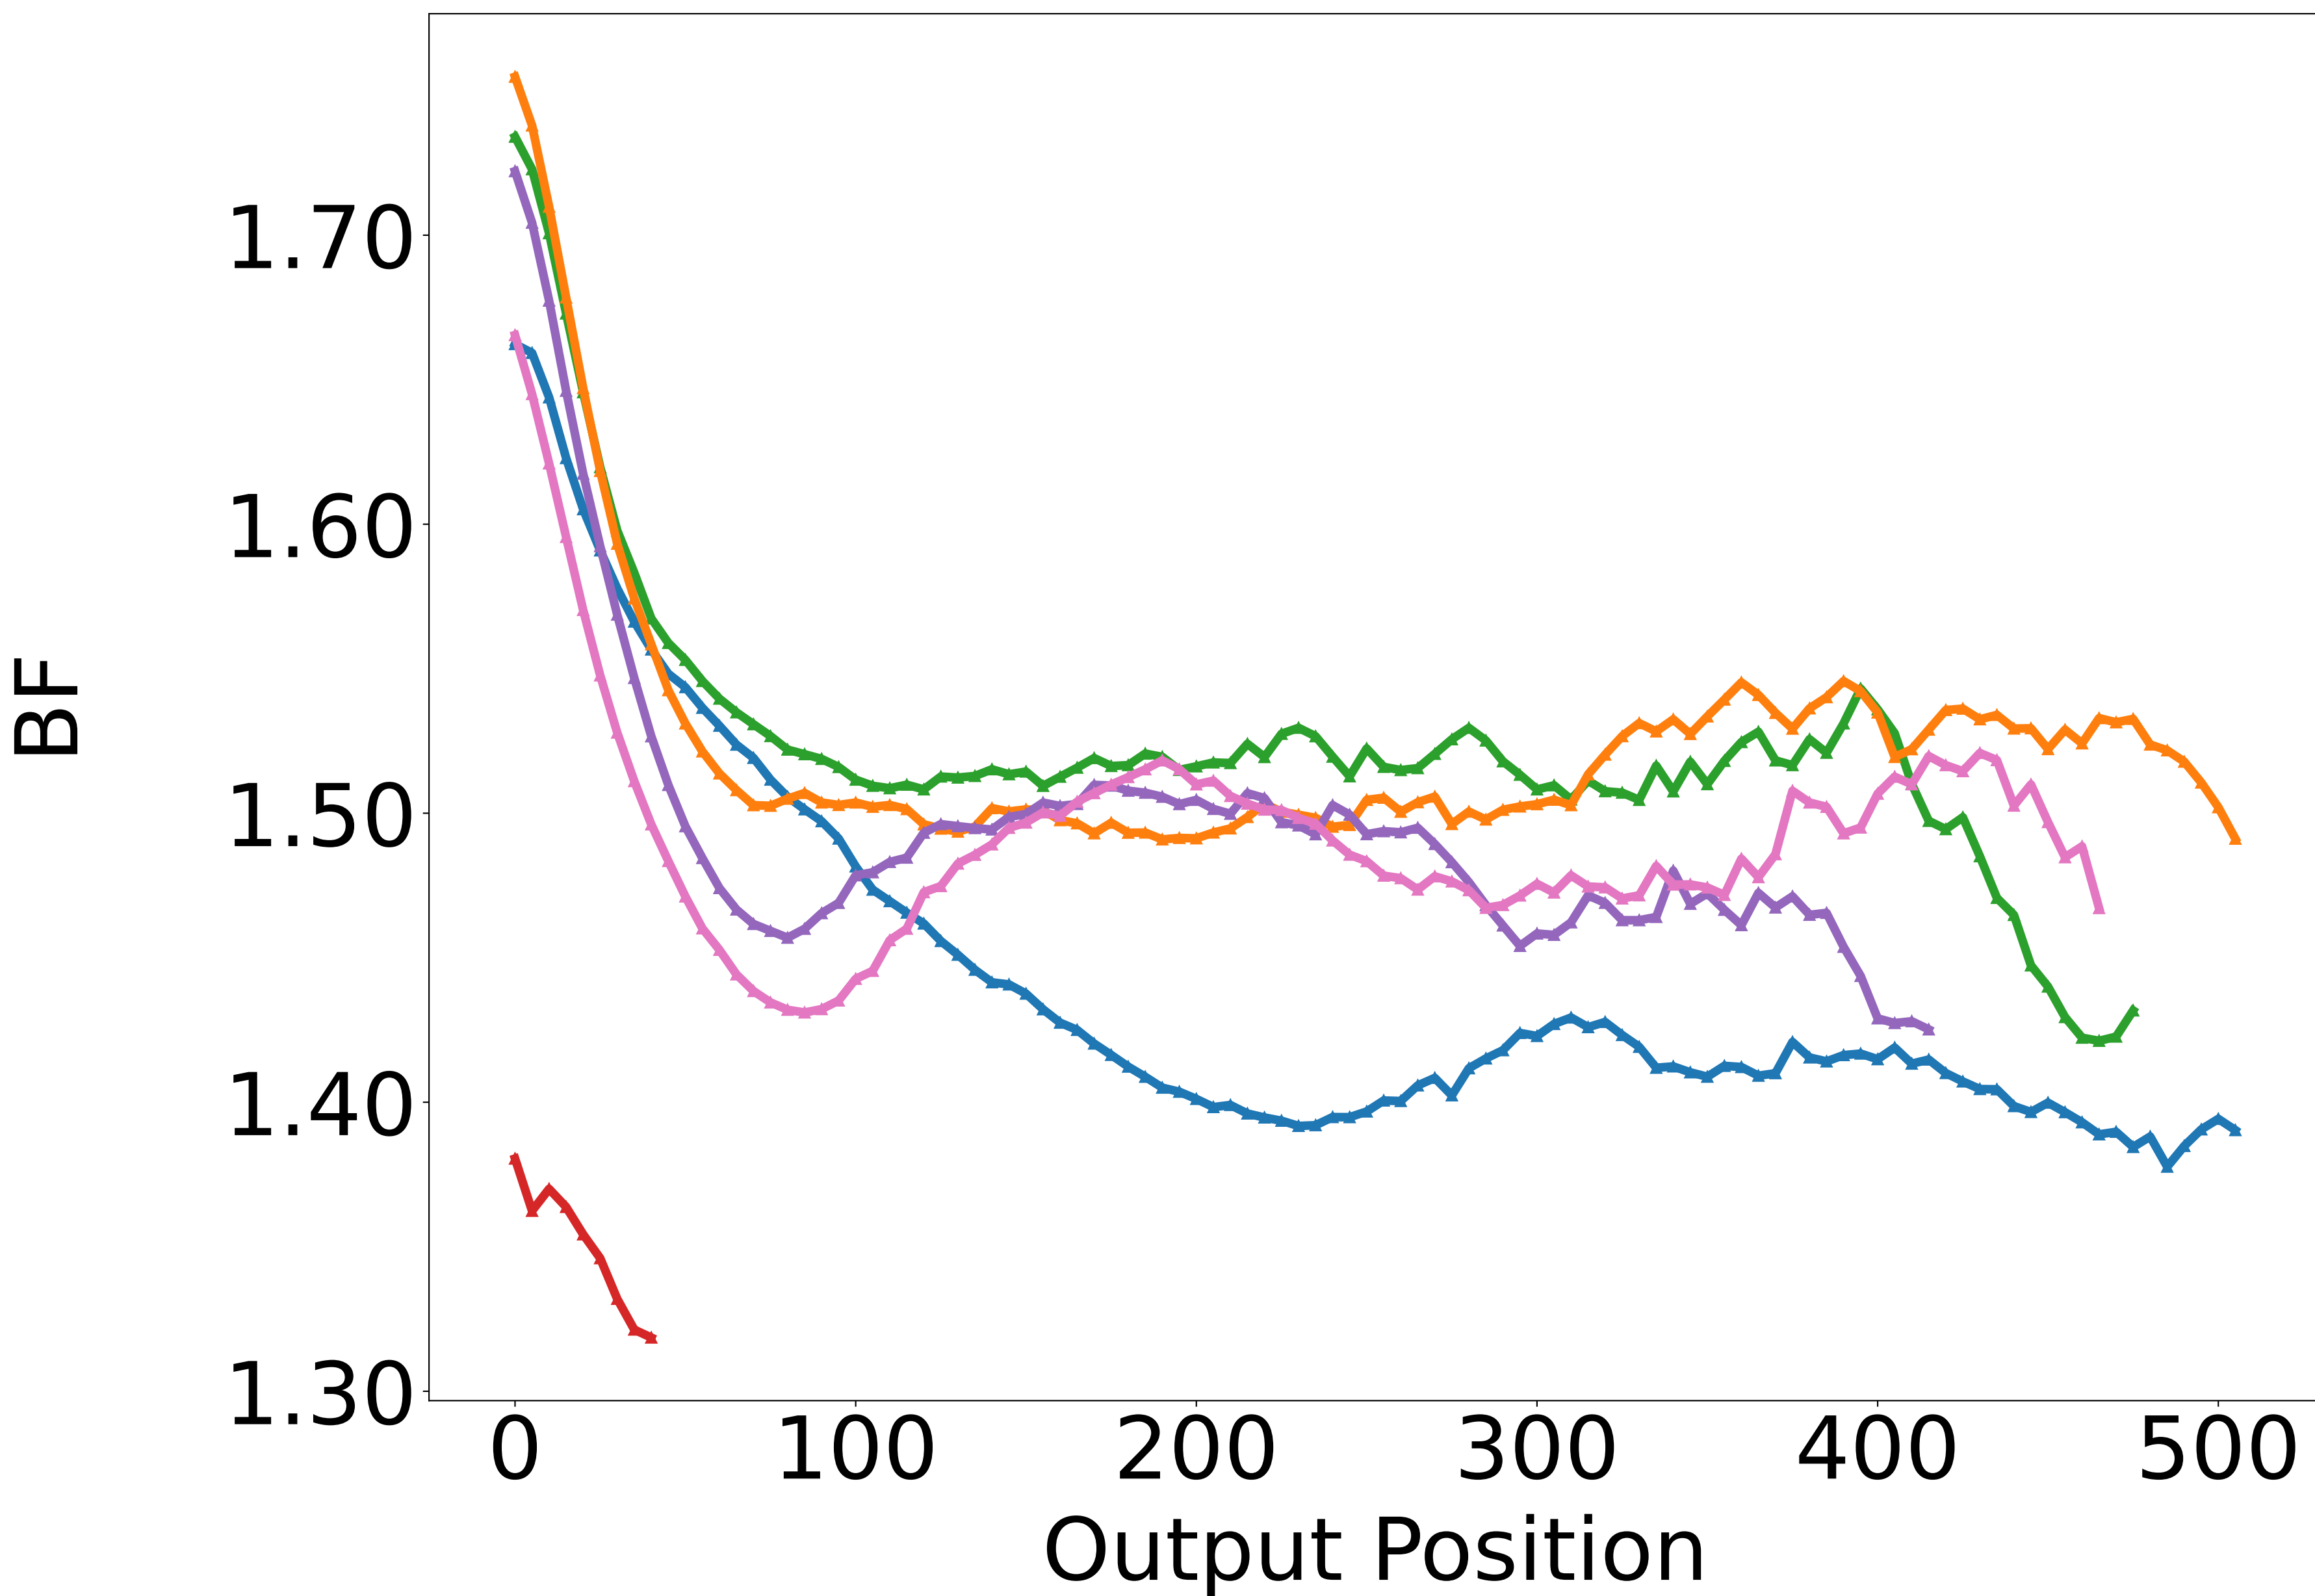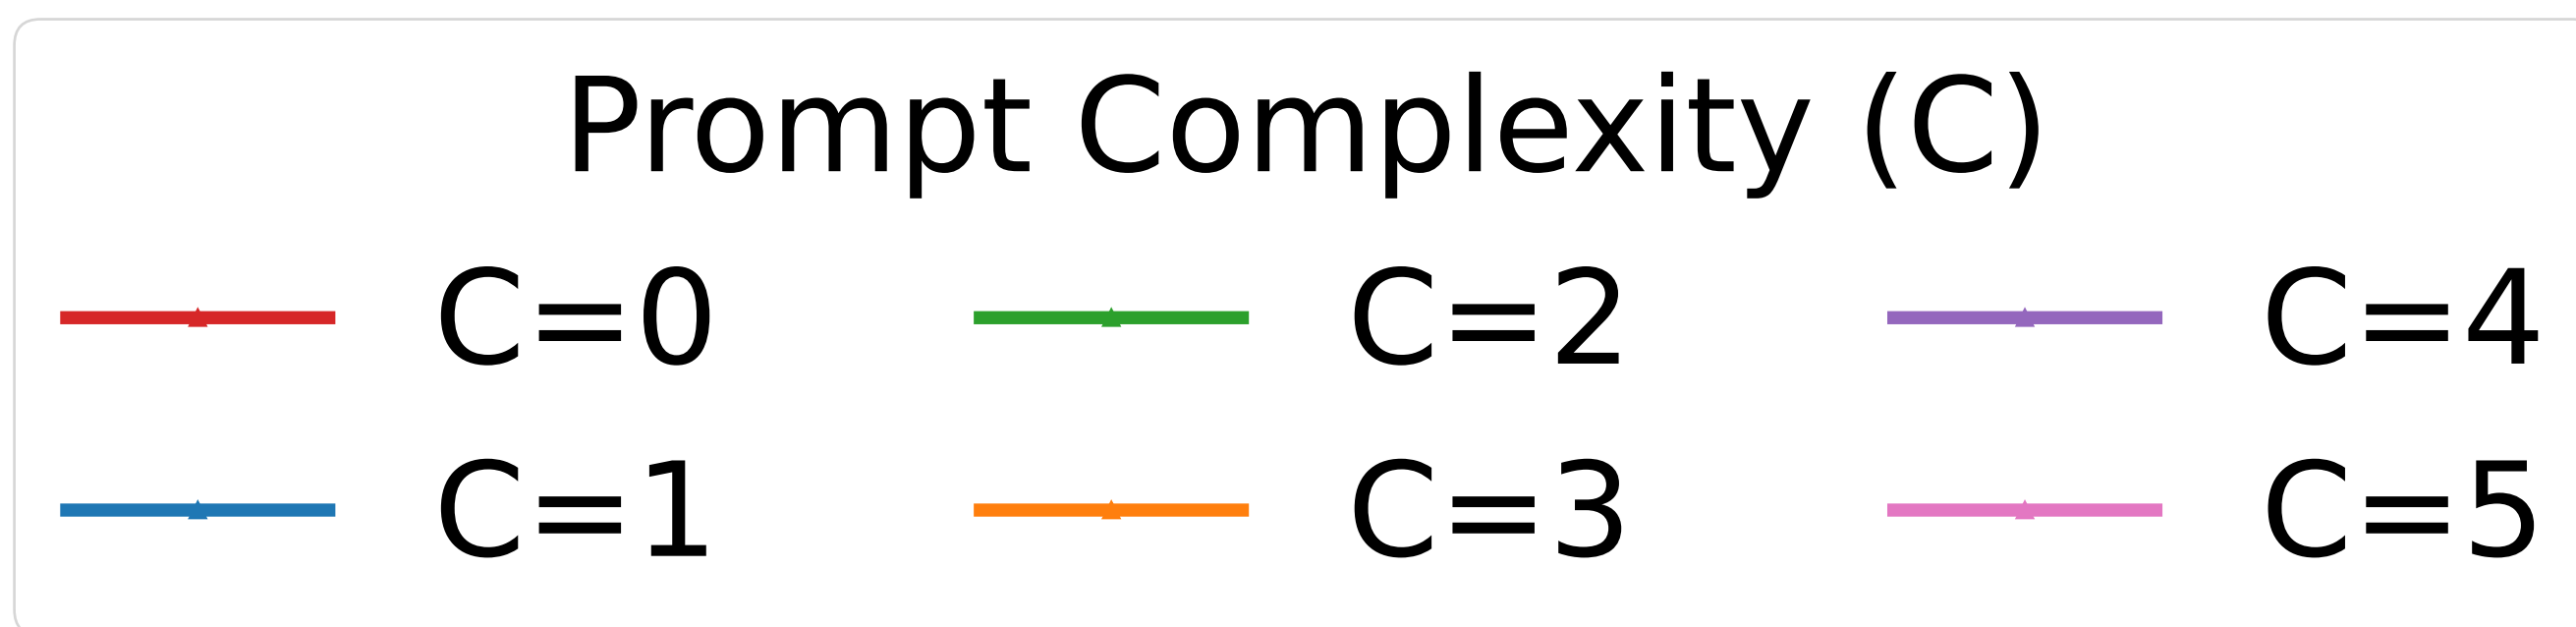

Supplement: supplementary_material [file piecewise_ebf_Llama-3-8B-Instruct_bf.pdf › supplementary_materials/bf_output_dynamic/bbcnews_latest/piecewise_ebf_Llama-3-8B-Instruct_bf.pdf]

# Llama-3-8B

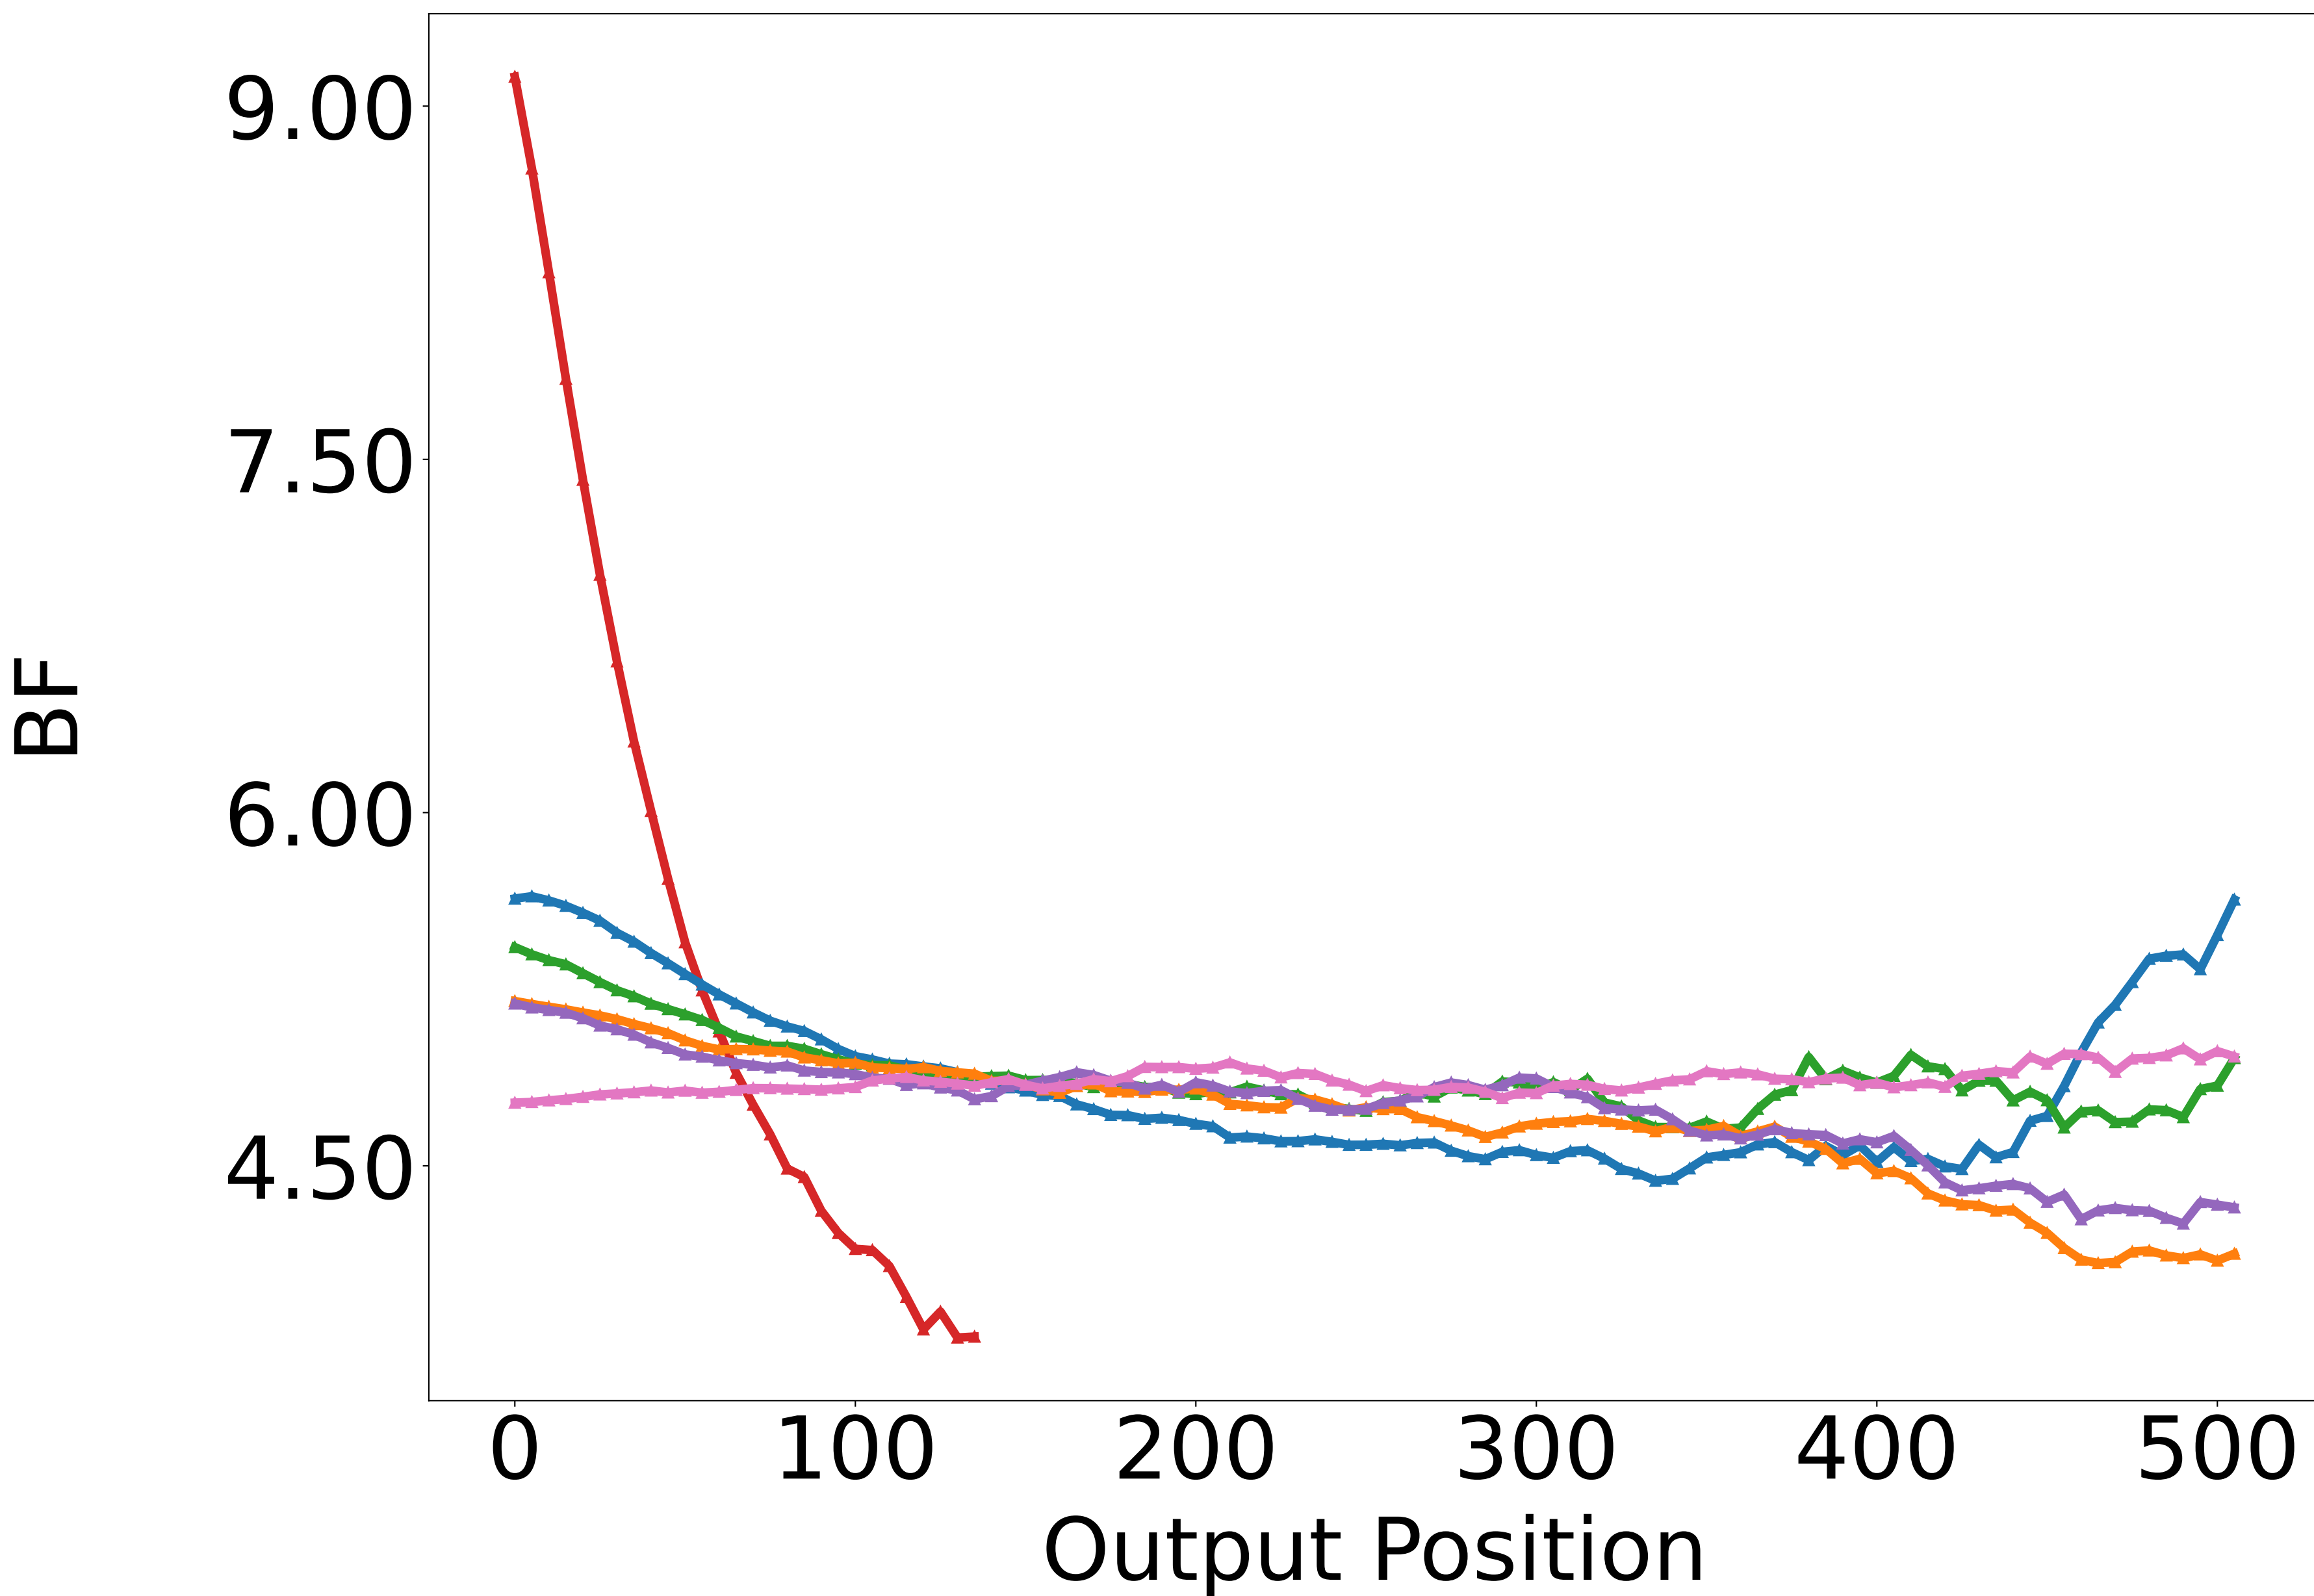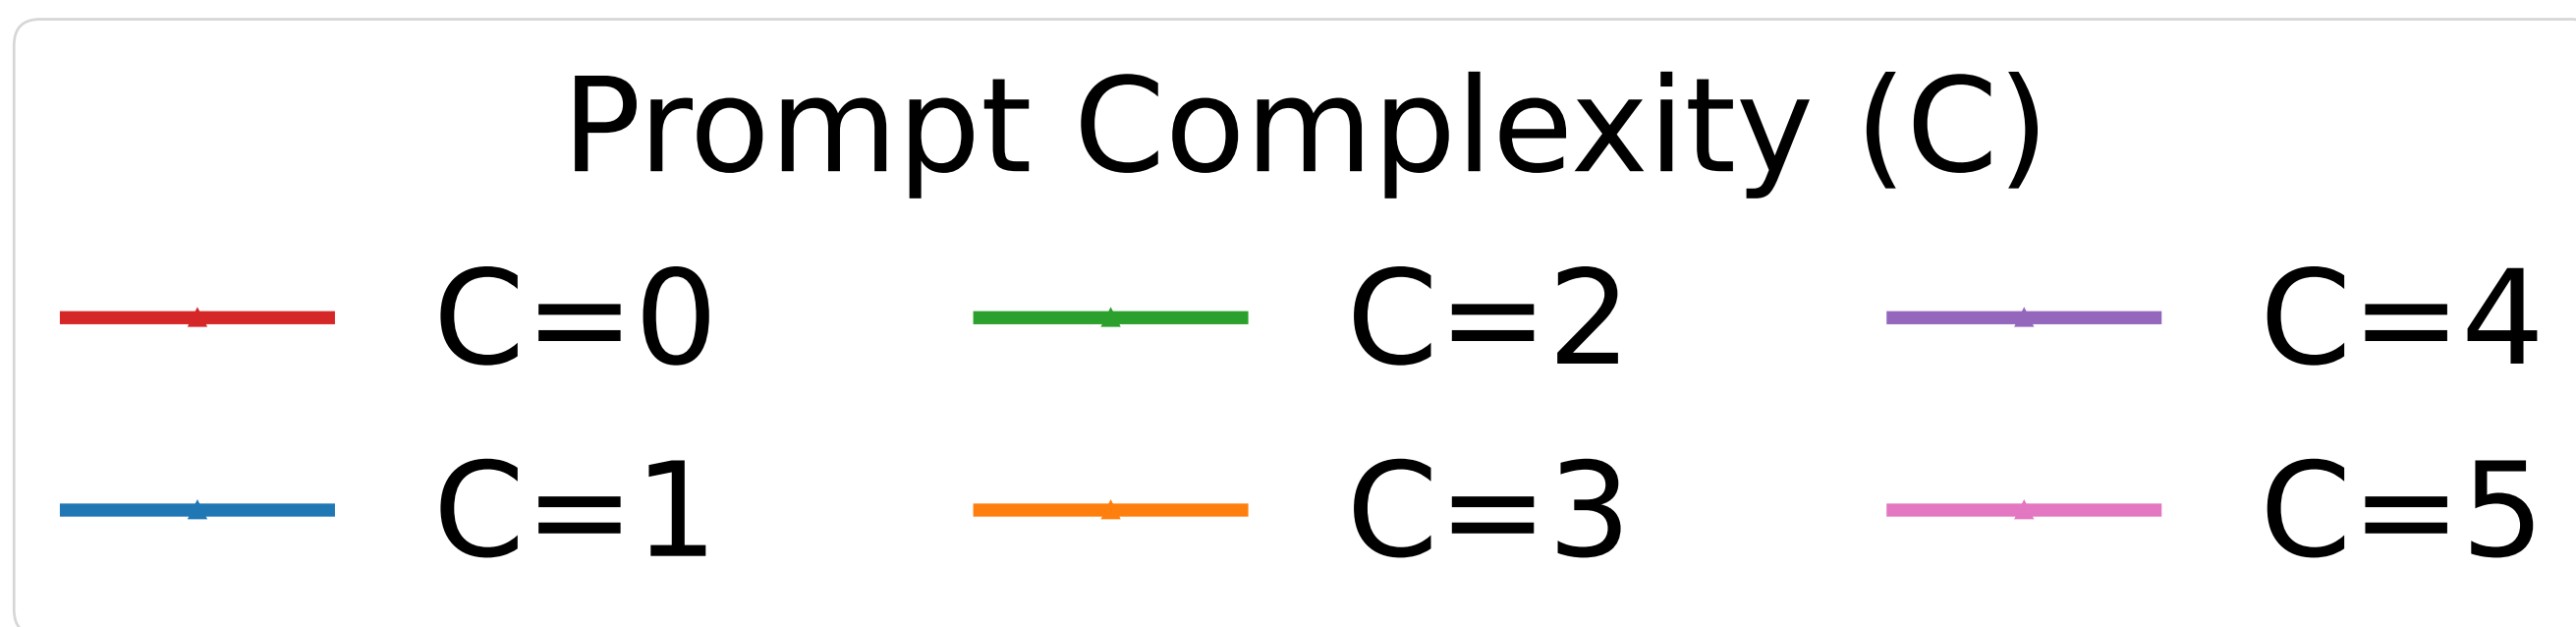

Supplement: supplementary_material [file piecewise_ebf_Llama-3-8B_bf.pdf › supplementary_materials/bf_output_dynamic/bbcnews_latest/piecewise_ebf_Llama-3-8B_bf.pdf]

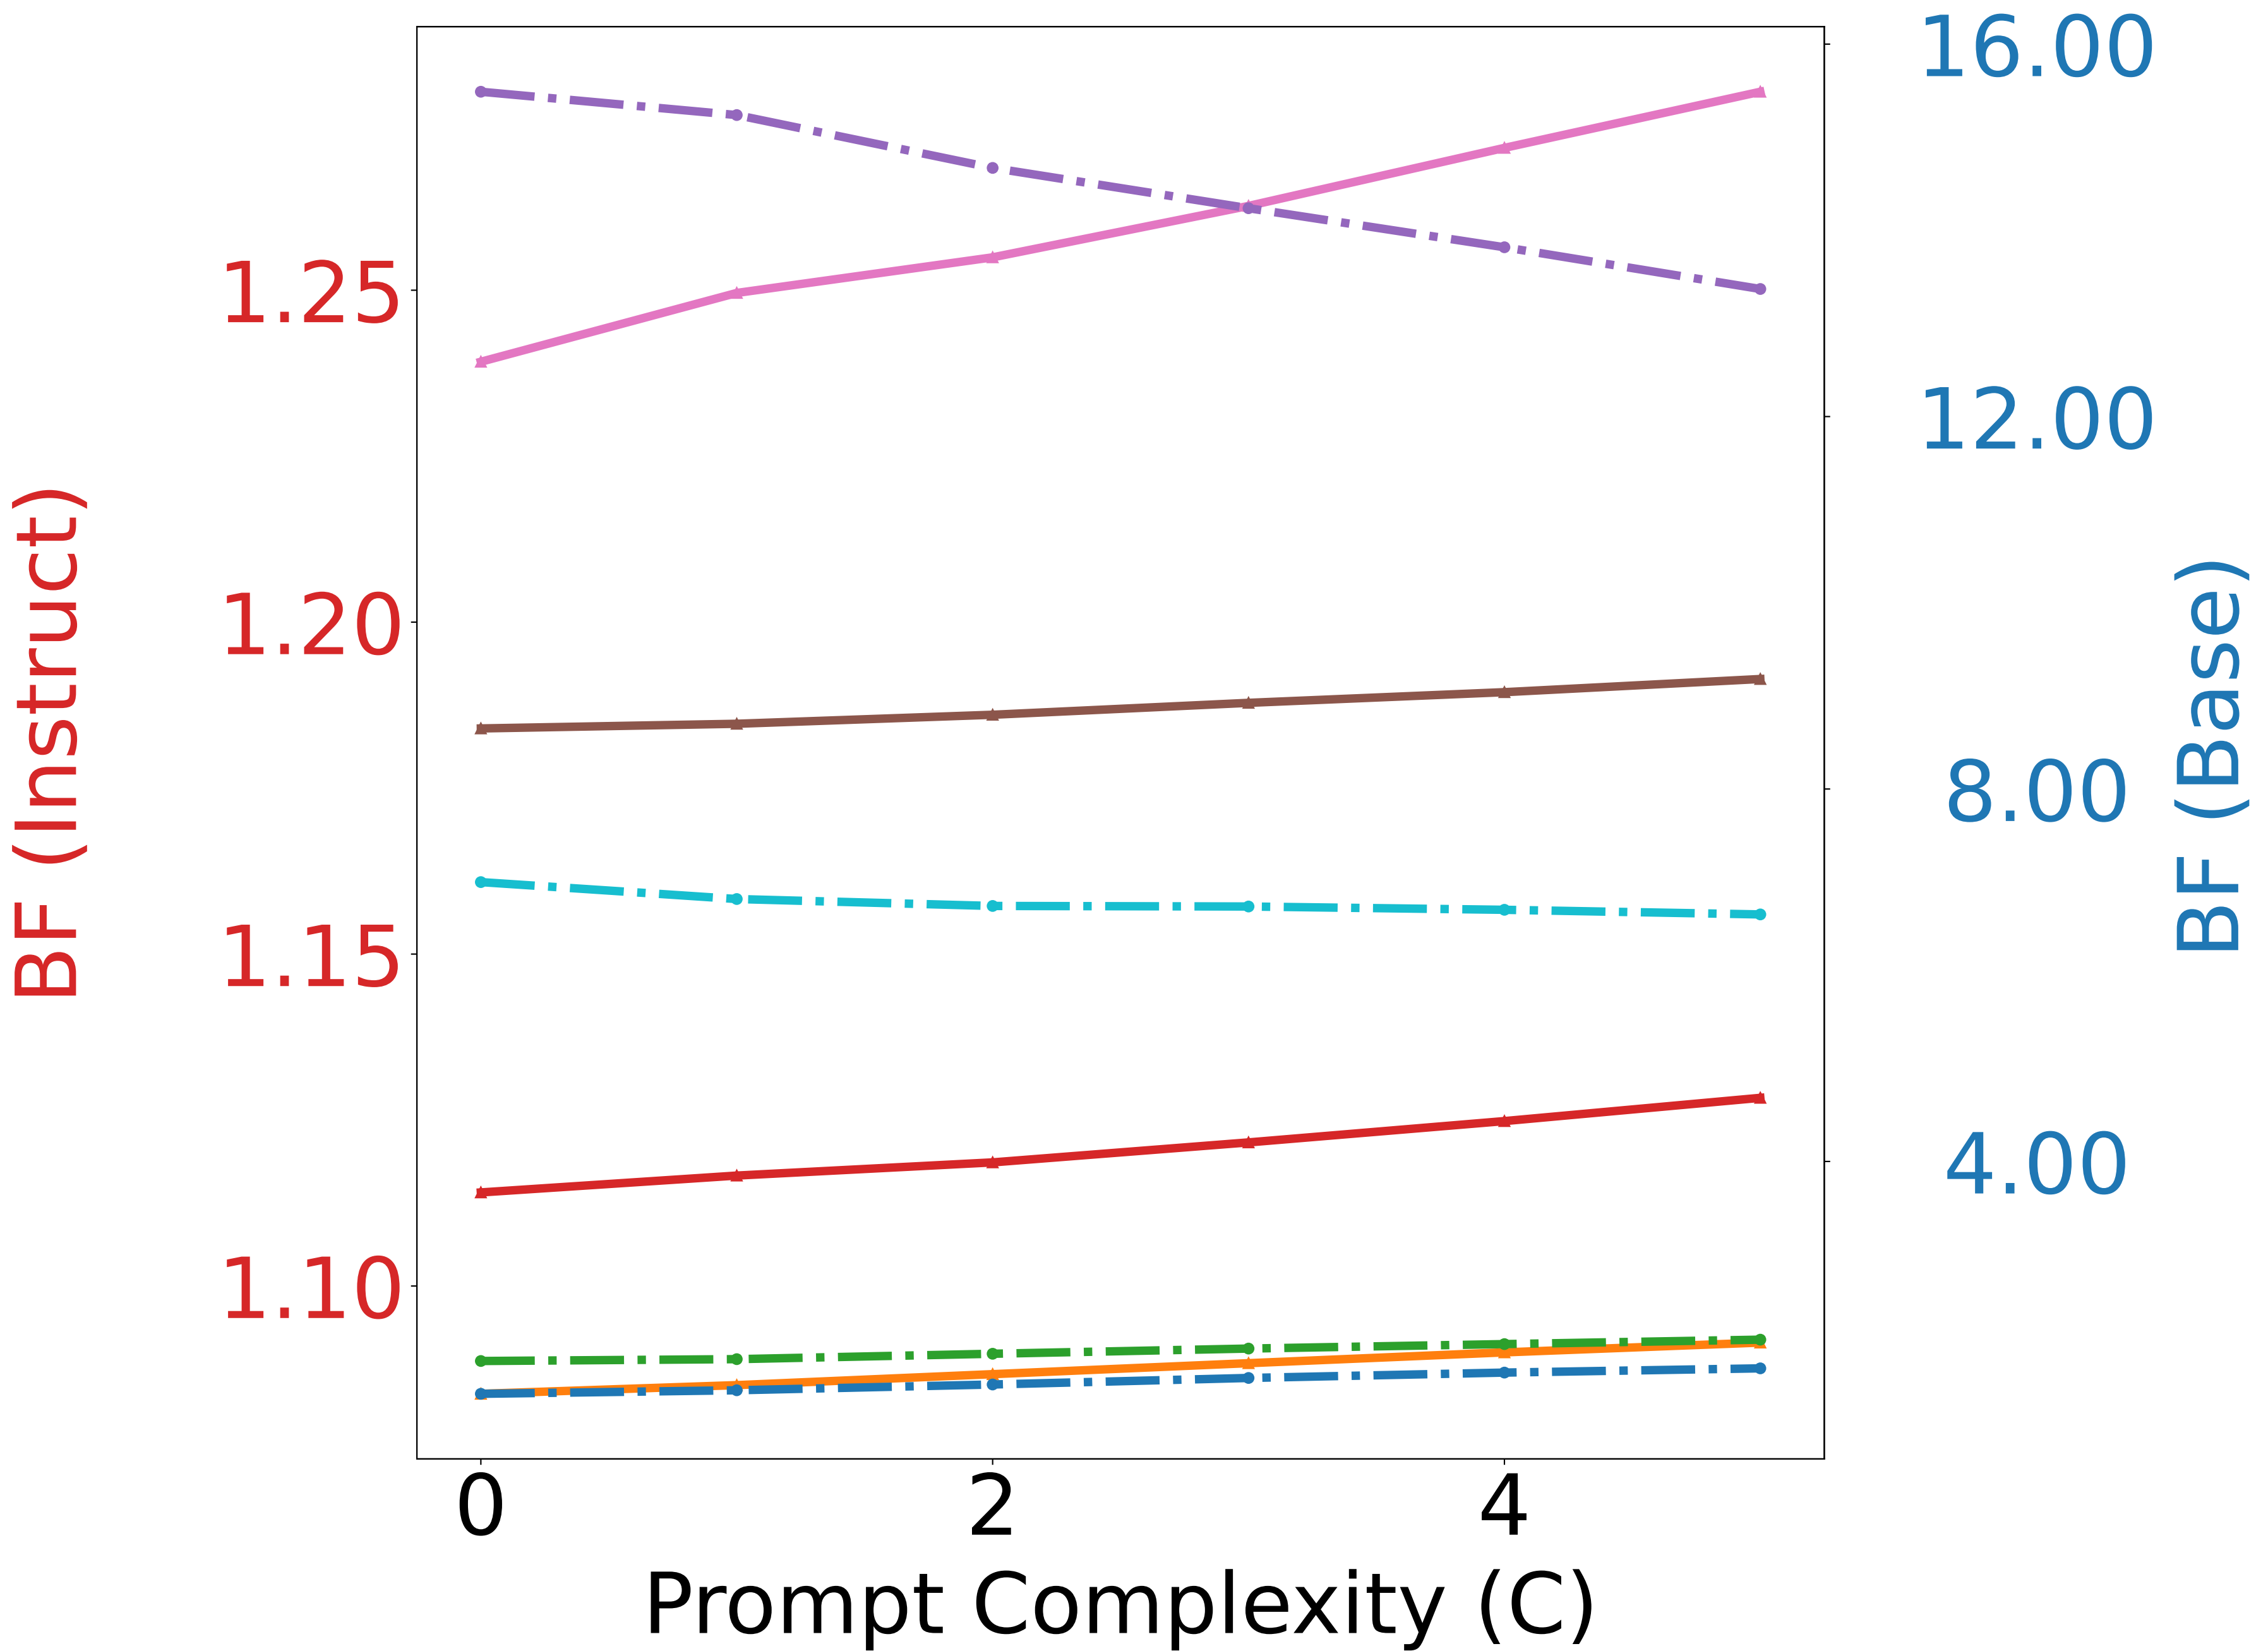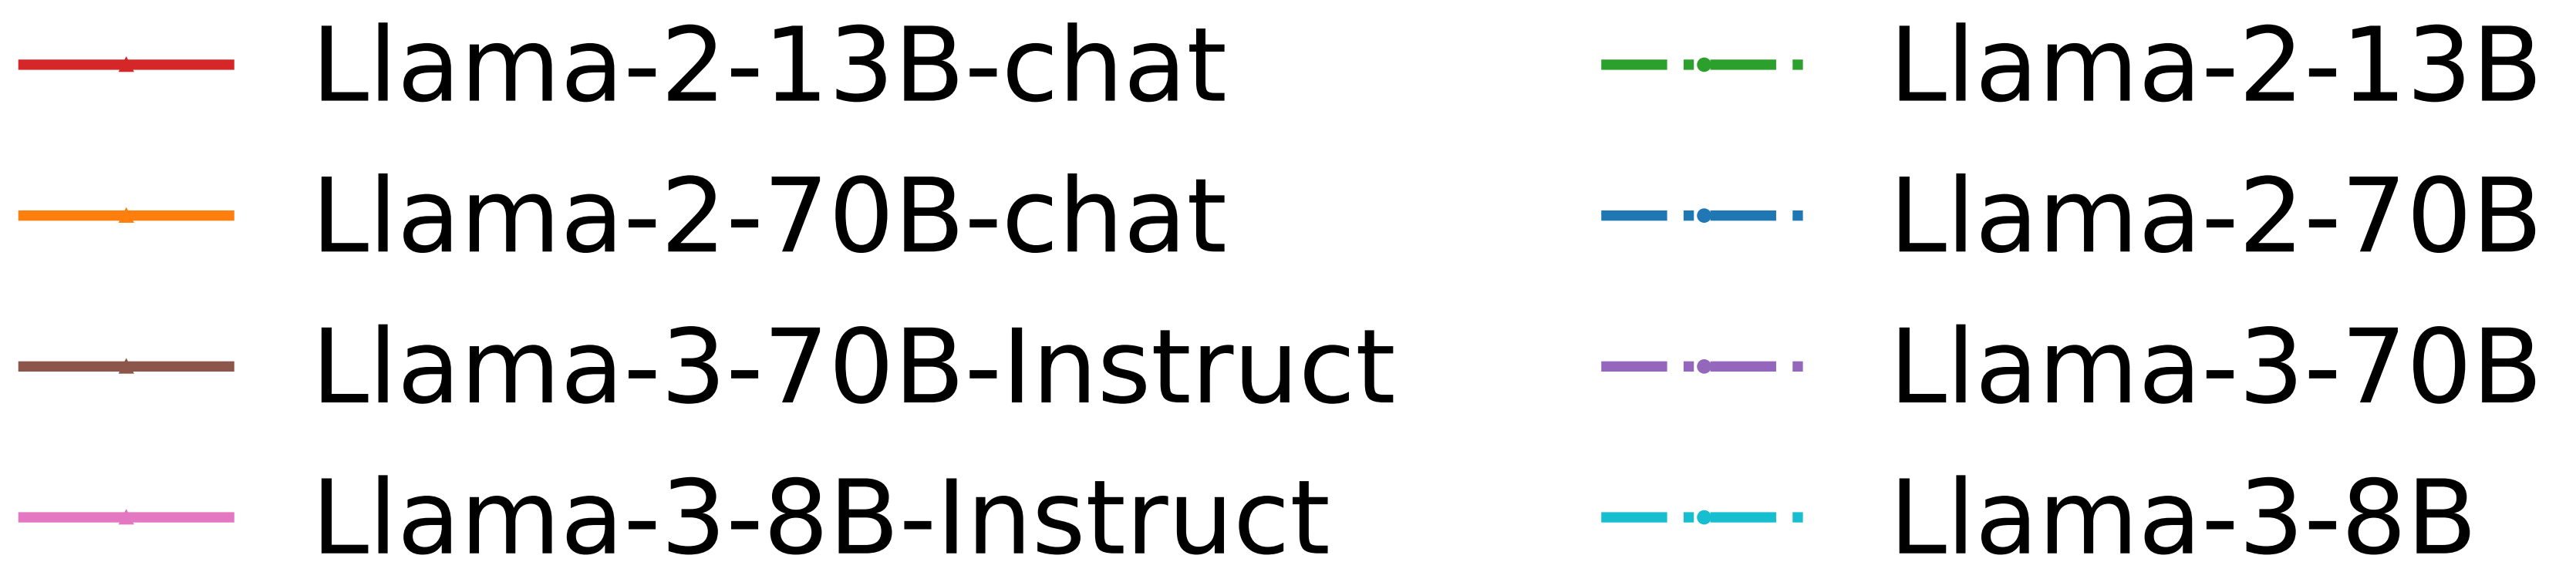

Supplement: supplementary_material [file model_wise_comparison_ebf_bf.pdf › supplementary_materials/bf_output_dynamic/cognac/model_wise_comparison_ebf_bf.pdf]

# Llama-2-13B-chat

BF

1.20  
1.18  
1.16  
1.14  
1.12

0

100

200

300

Output Position

Prompt Complexity (C)

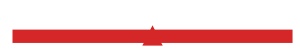

C=0

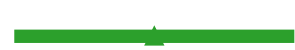

C=2

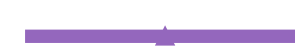

C=4

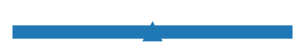

C=1

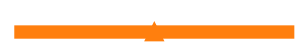

C=3

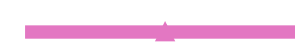

C=5

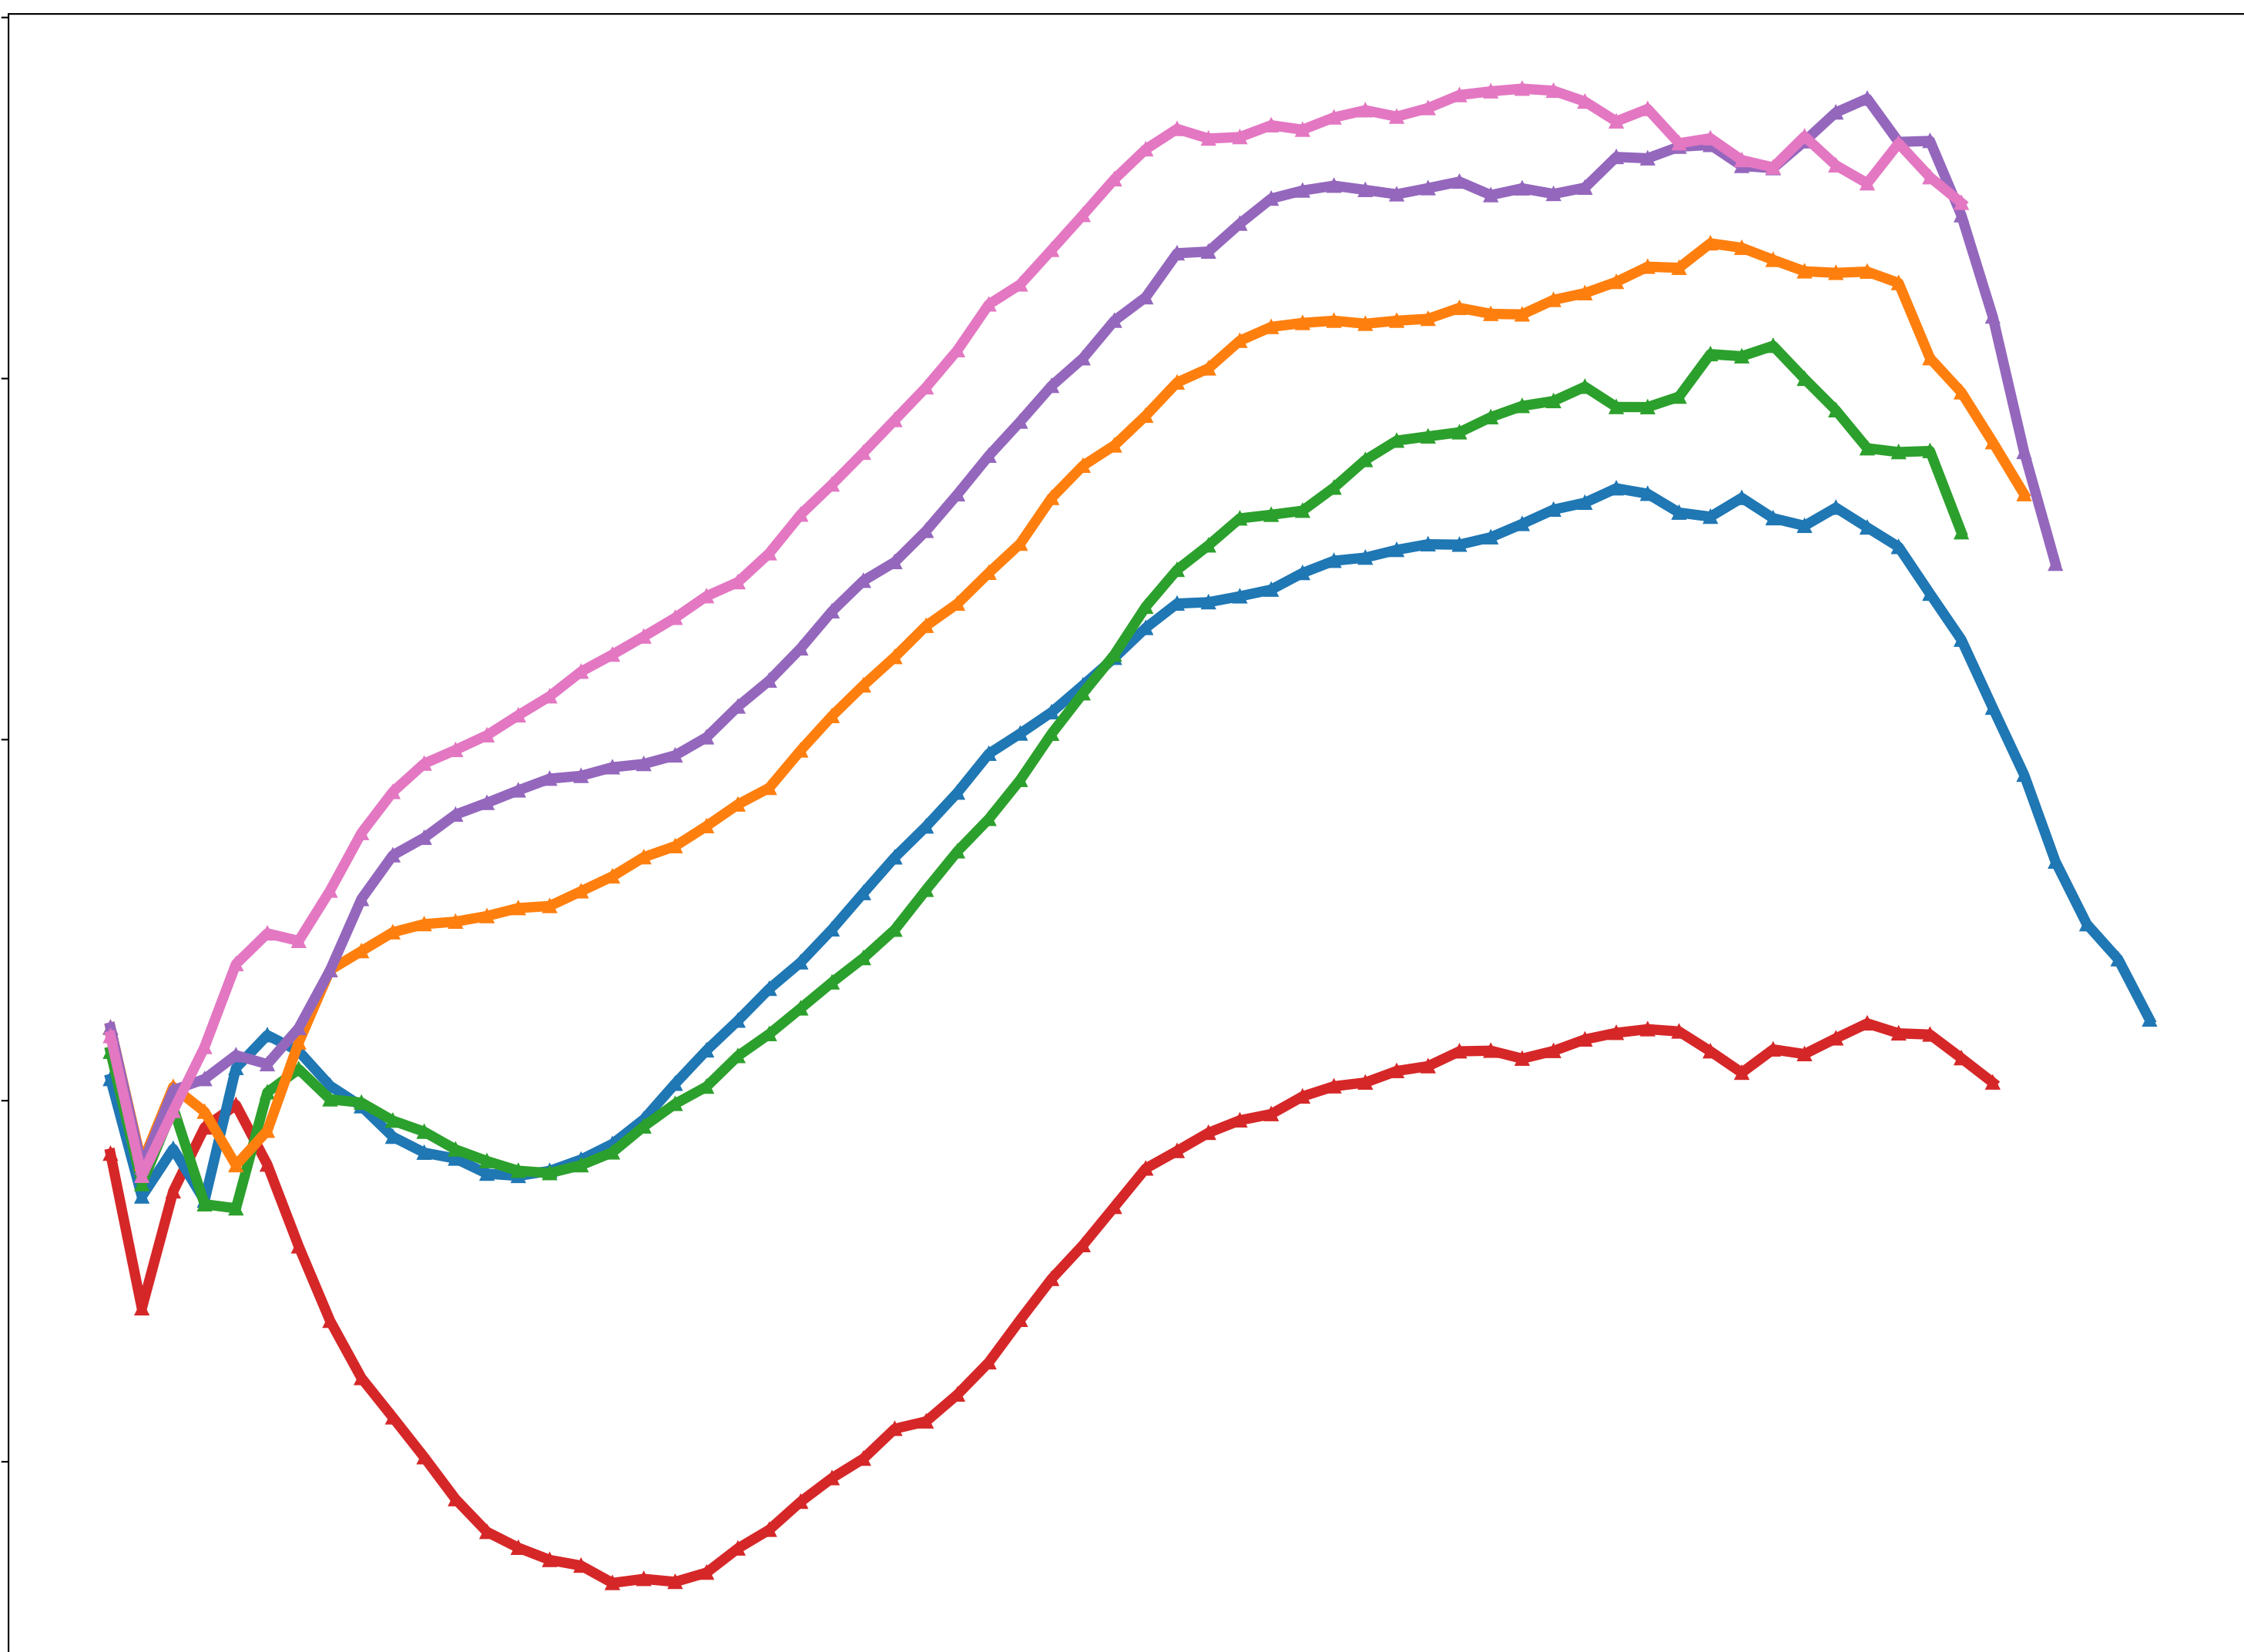

Supplement: supplementary_material [file piecewise_ebf_Llama-2-13B-chat_bf.pdf › supplementary_materials/bf_output_dynamic/cognac/piecewise_ebf_Llama-2-13B-chat_bf.pdf]

# Llama-2-13B-chat

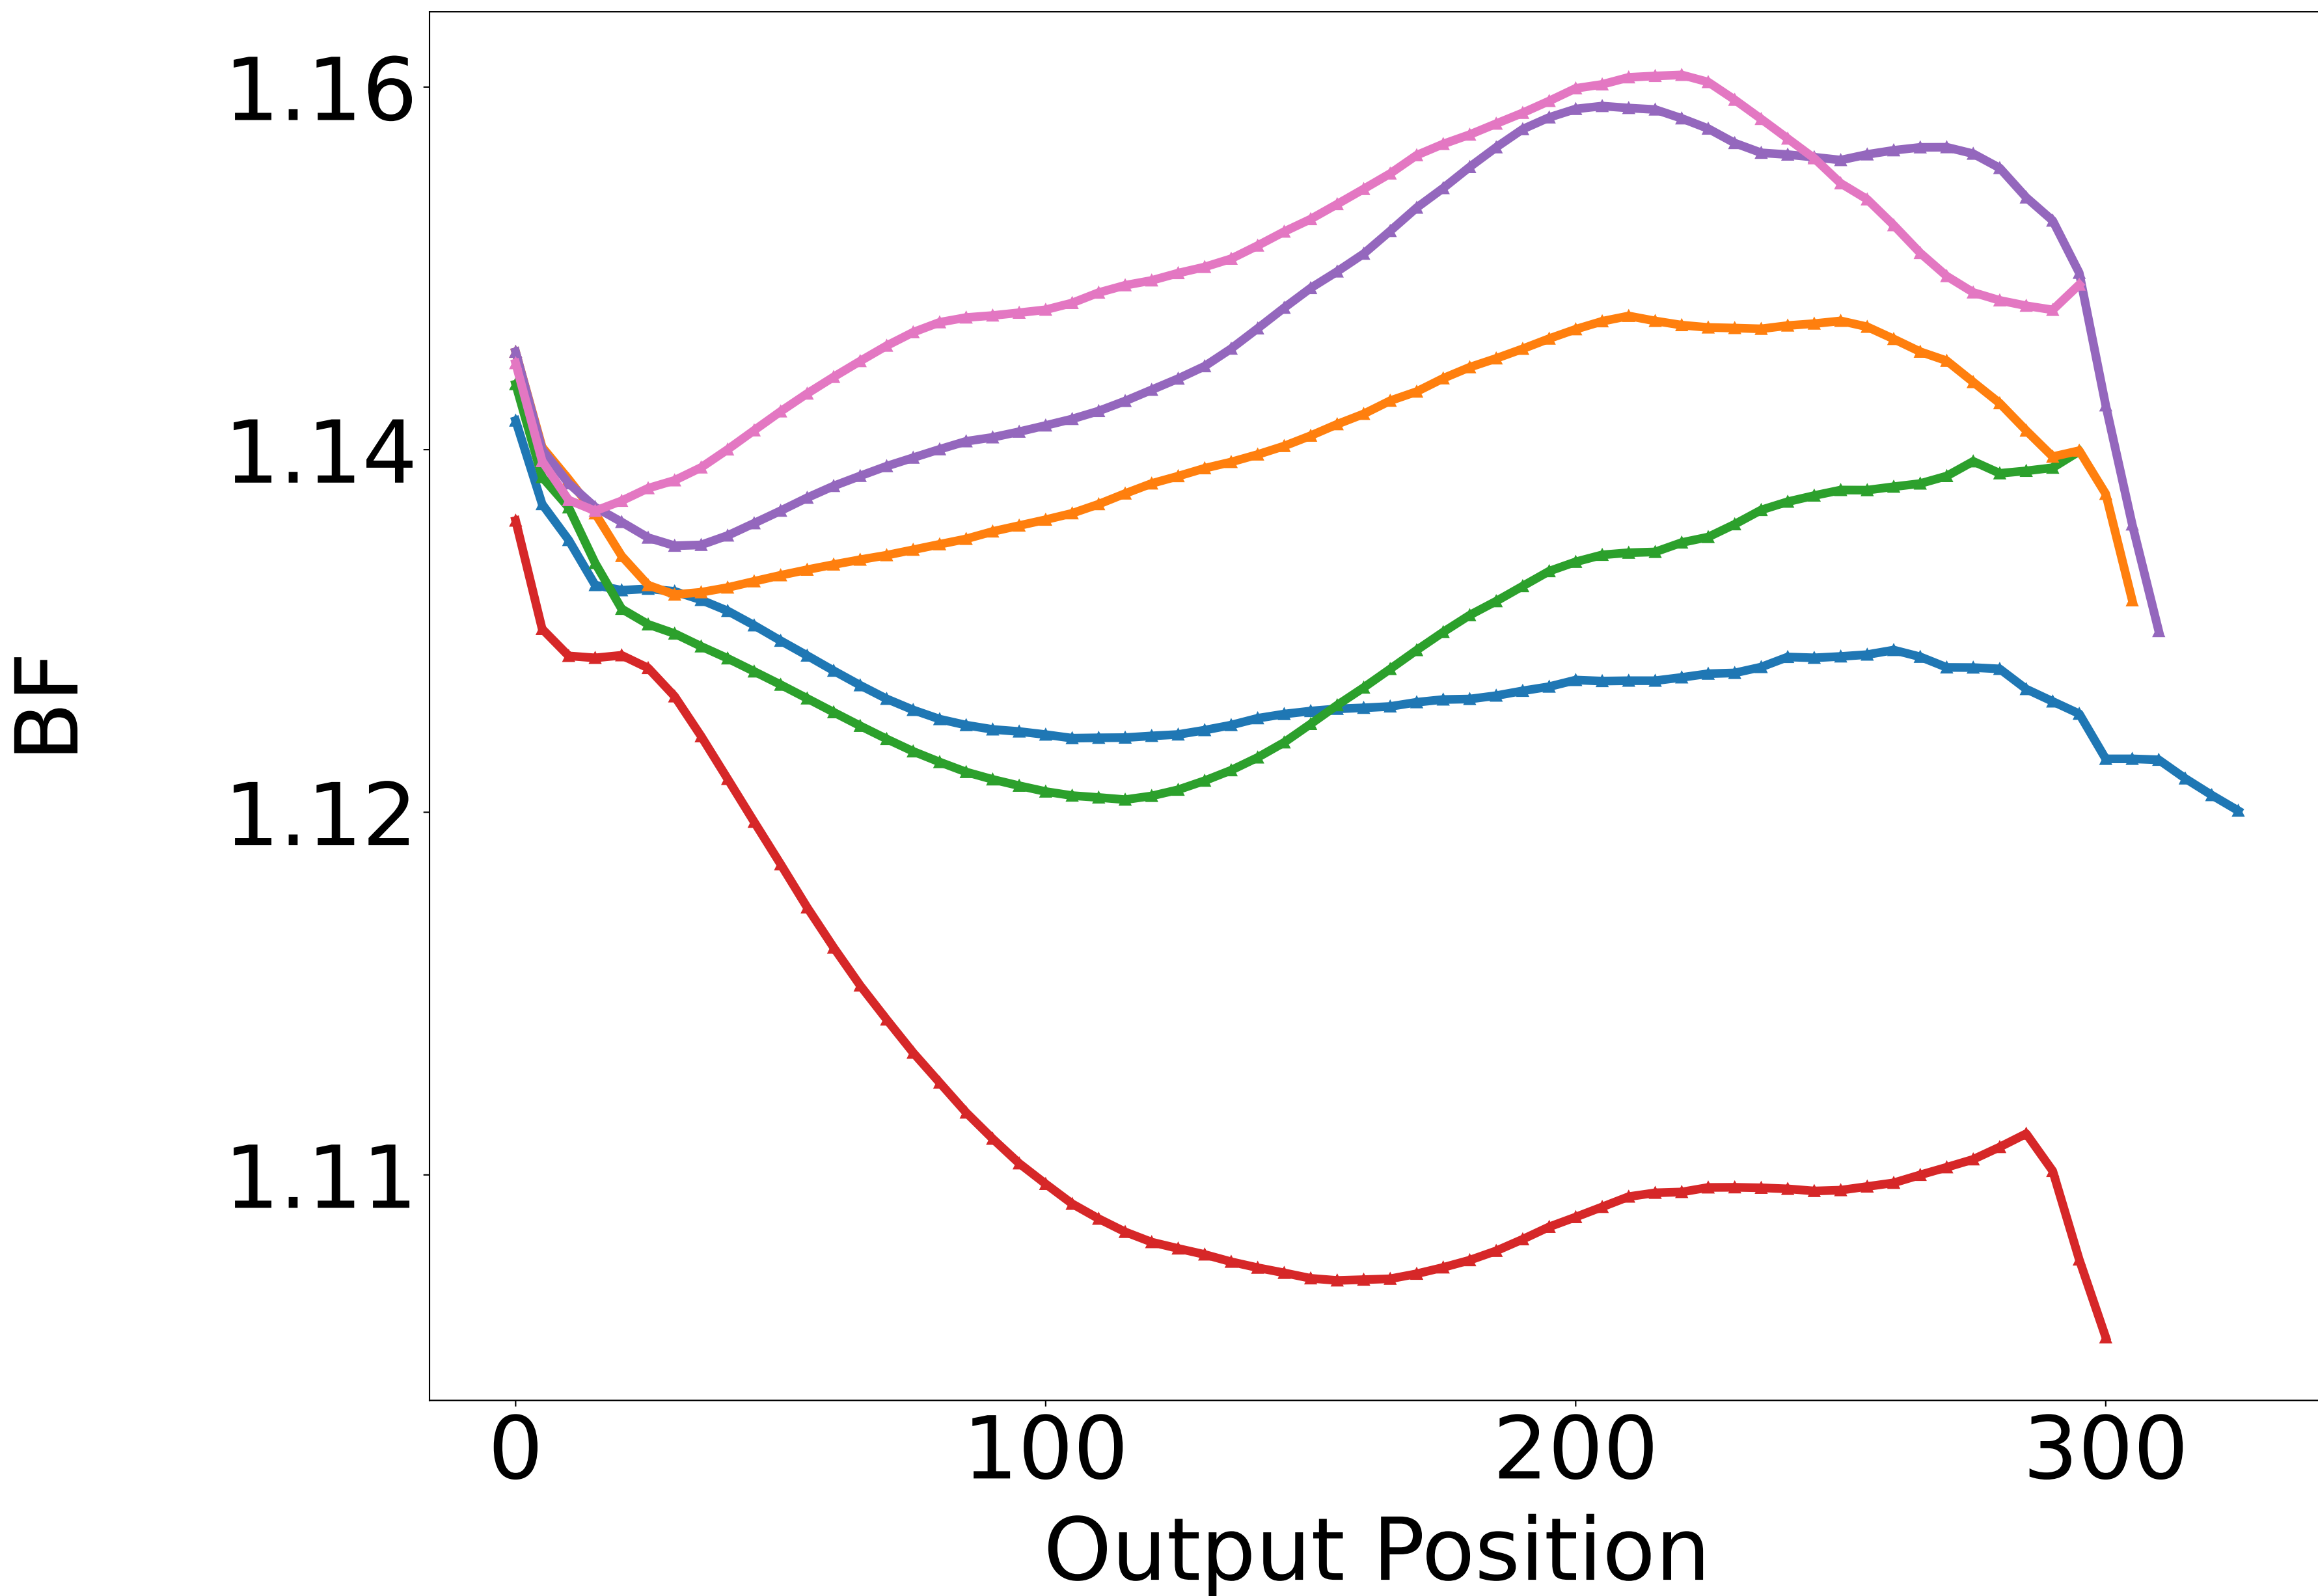

## Prompt Complexity (C)

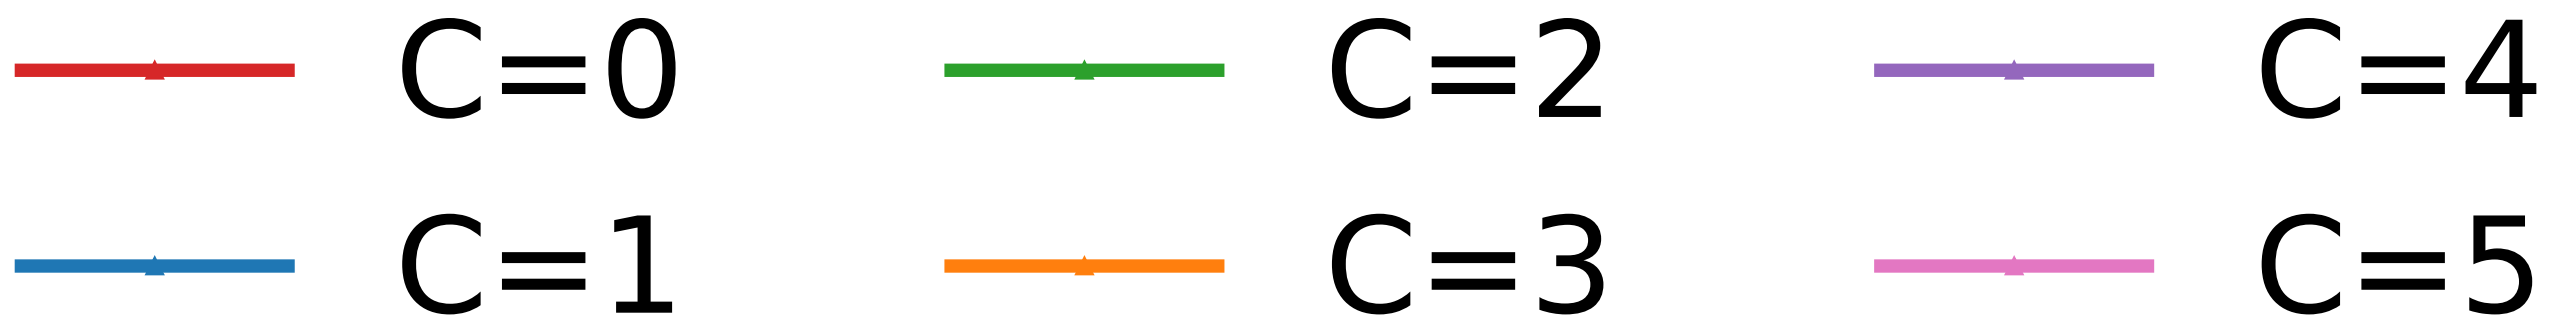

Supplement: supplementary_material [file piecewise_ebf_Llama-2-13B-chat_bf_fixed_start.pdf › supplementary_materials/bf_output_dynamic/cognac/piecewise_ebf_Llama-2-13B-chat_bf_fixed_start.pdf]

# Llama-2-13B

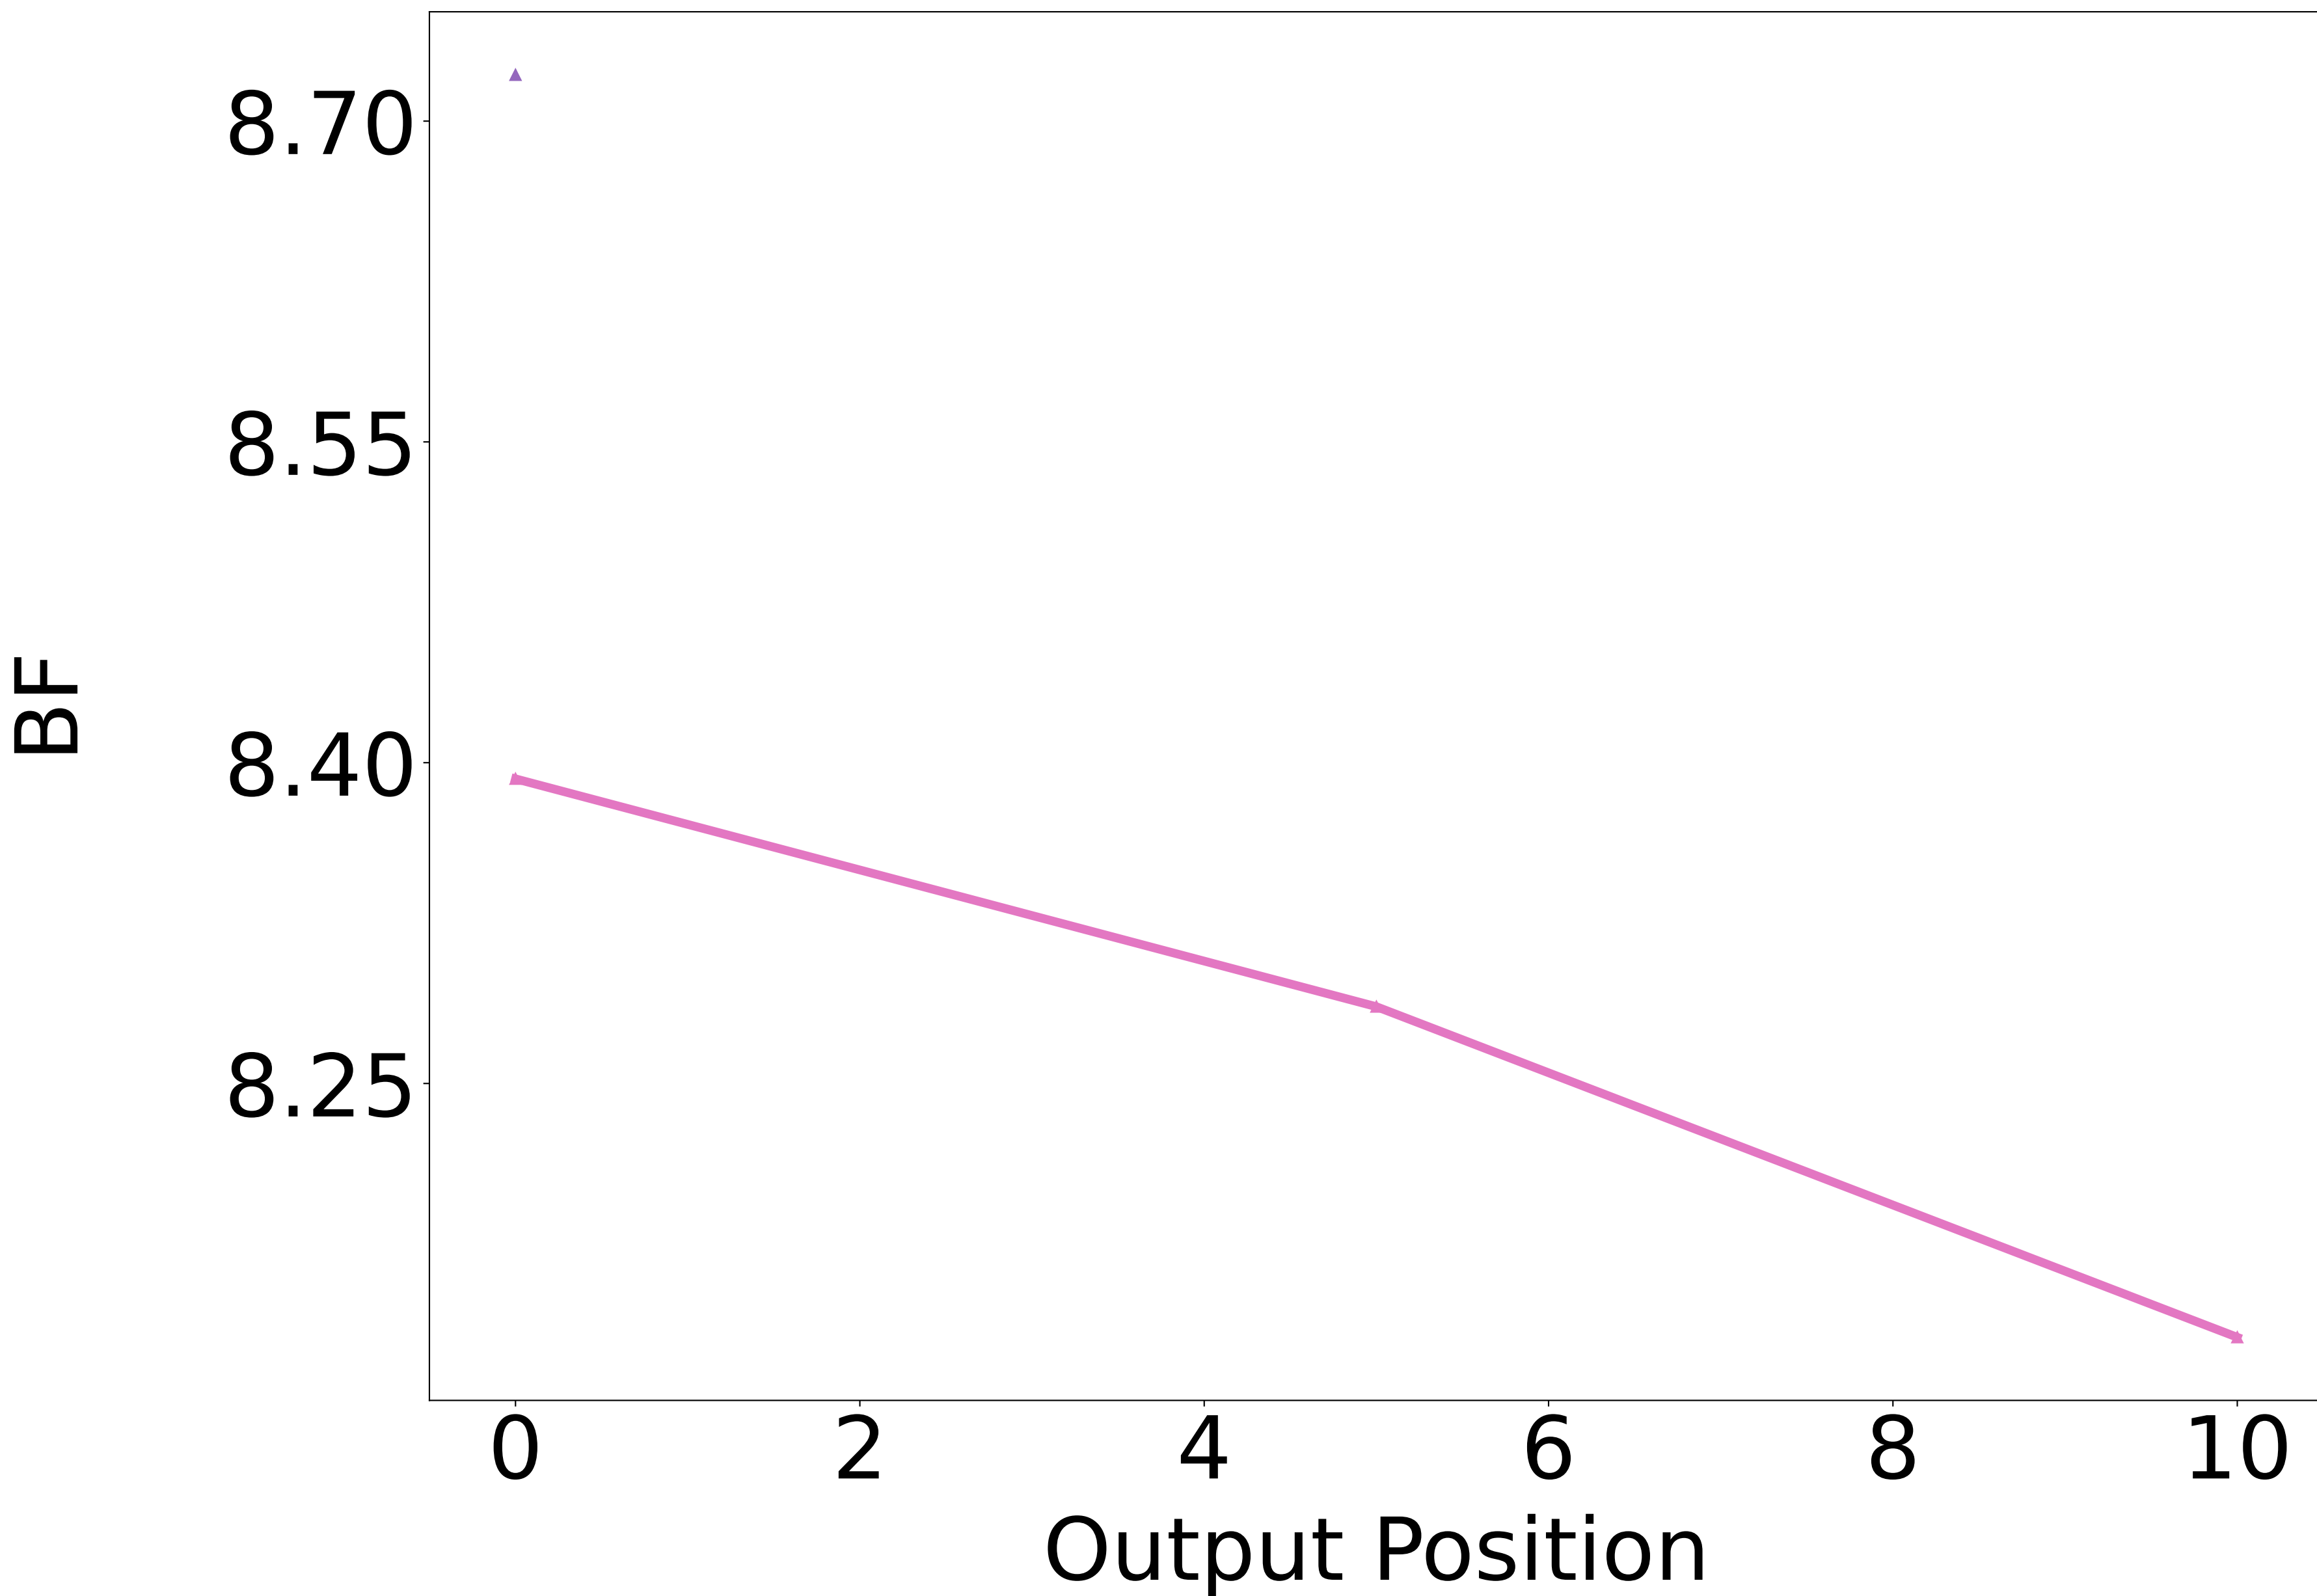

Supplement: supplementary_material [file piecewise_ebf_Llama-2-13B_bf.pdf › supplementary_materials/bf_output_dynamic/cognac/piecewise_ebf_Llama-2-13B_bf.pdf]

# Llama-2-13B

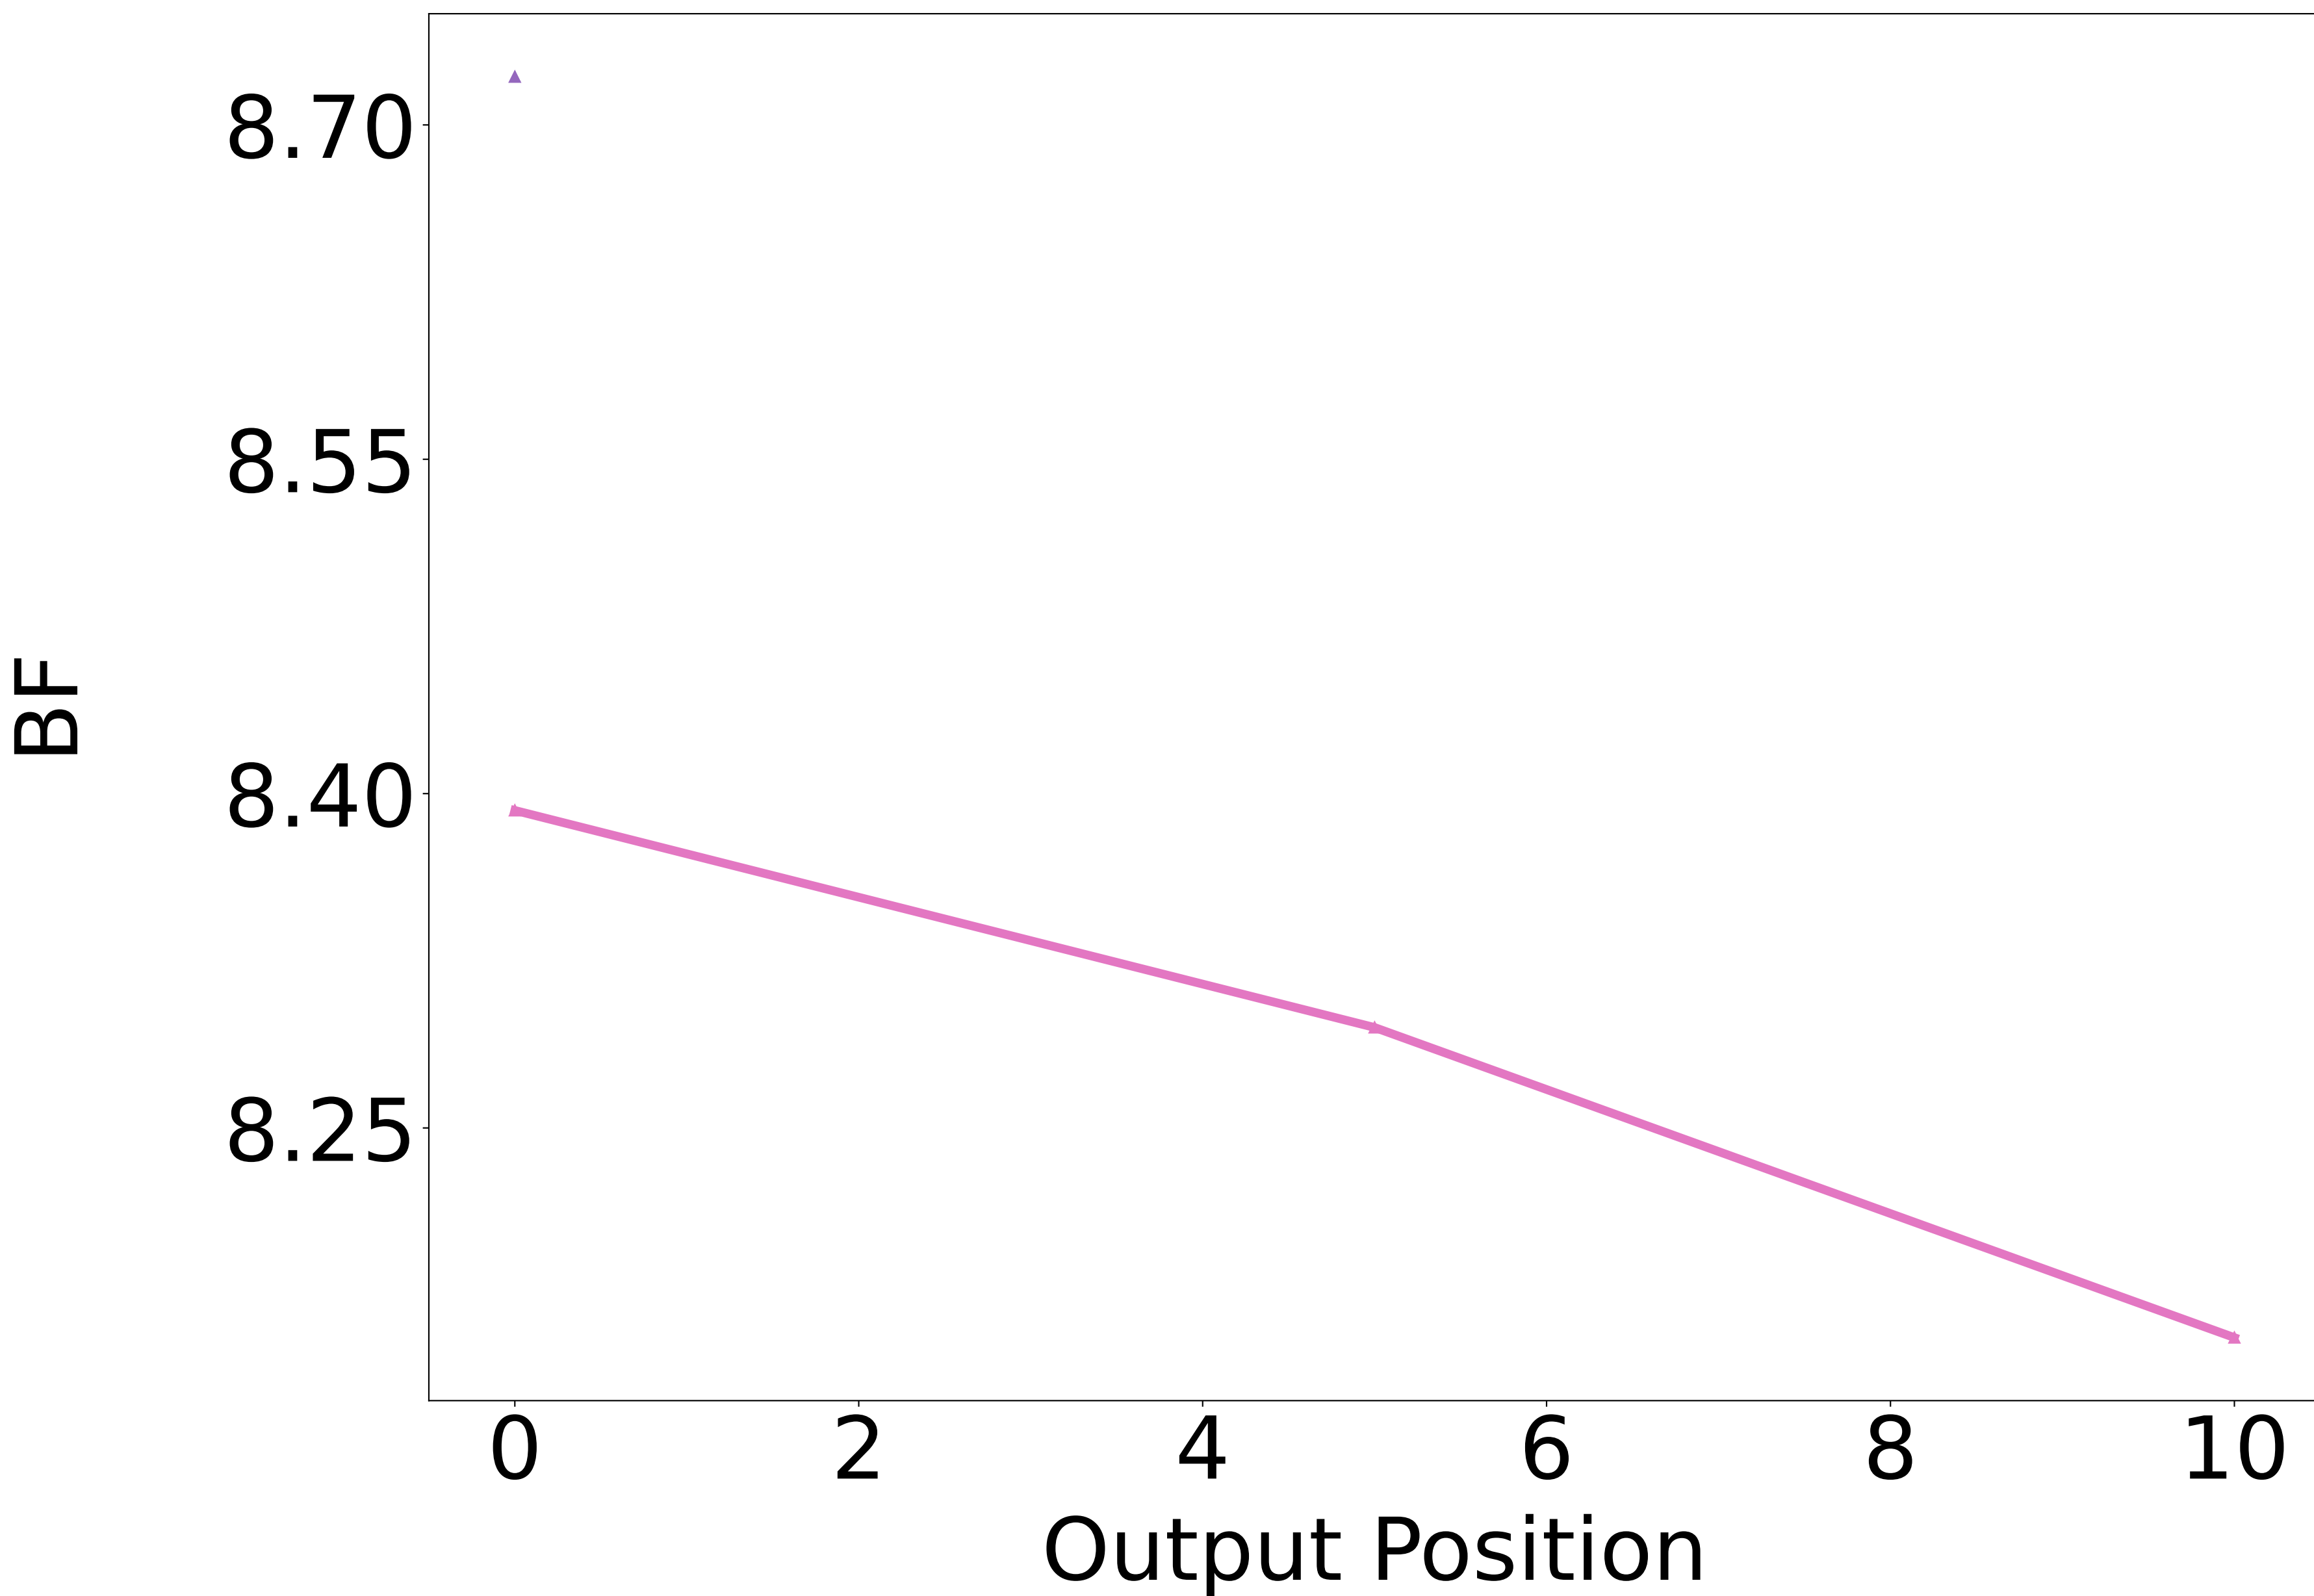

Supplement: supplementary_material [file piecewise_ebf_Llama-2-13B_bf_fixed_start.pdf › supplementary_materials/bf_output_dynamic/cognac/piecewise_ebf_Llama-2-13B_bf_fixed_start.pdf]

# Llama-2-70B-chat

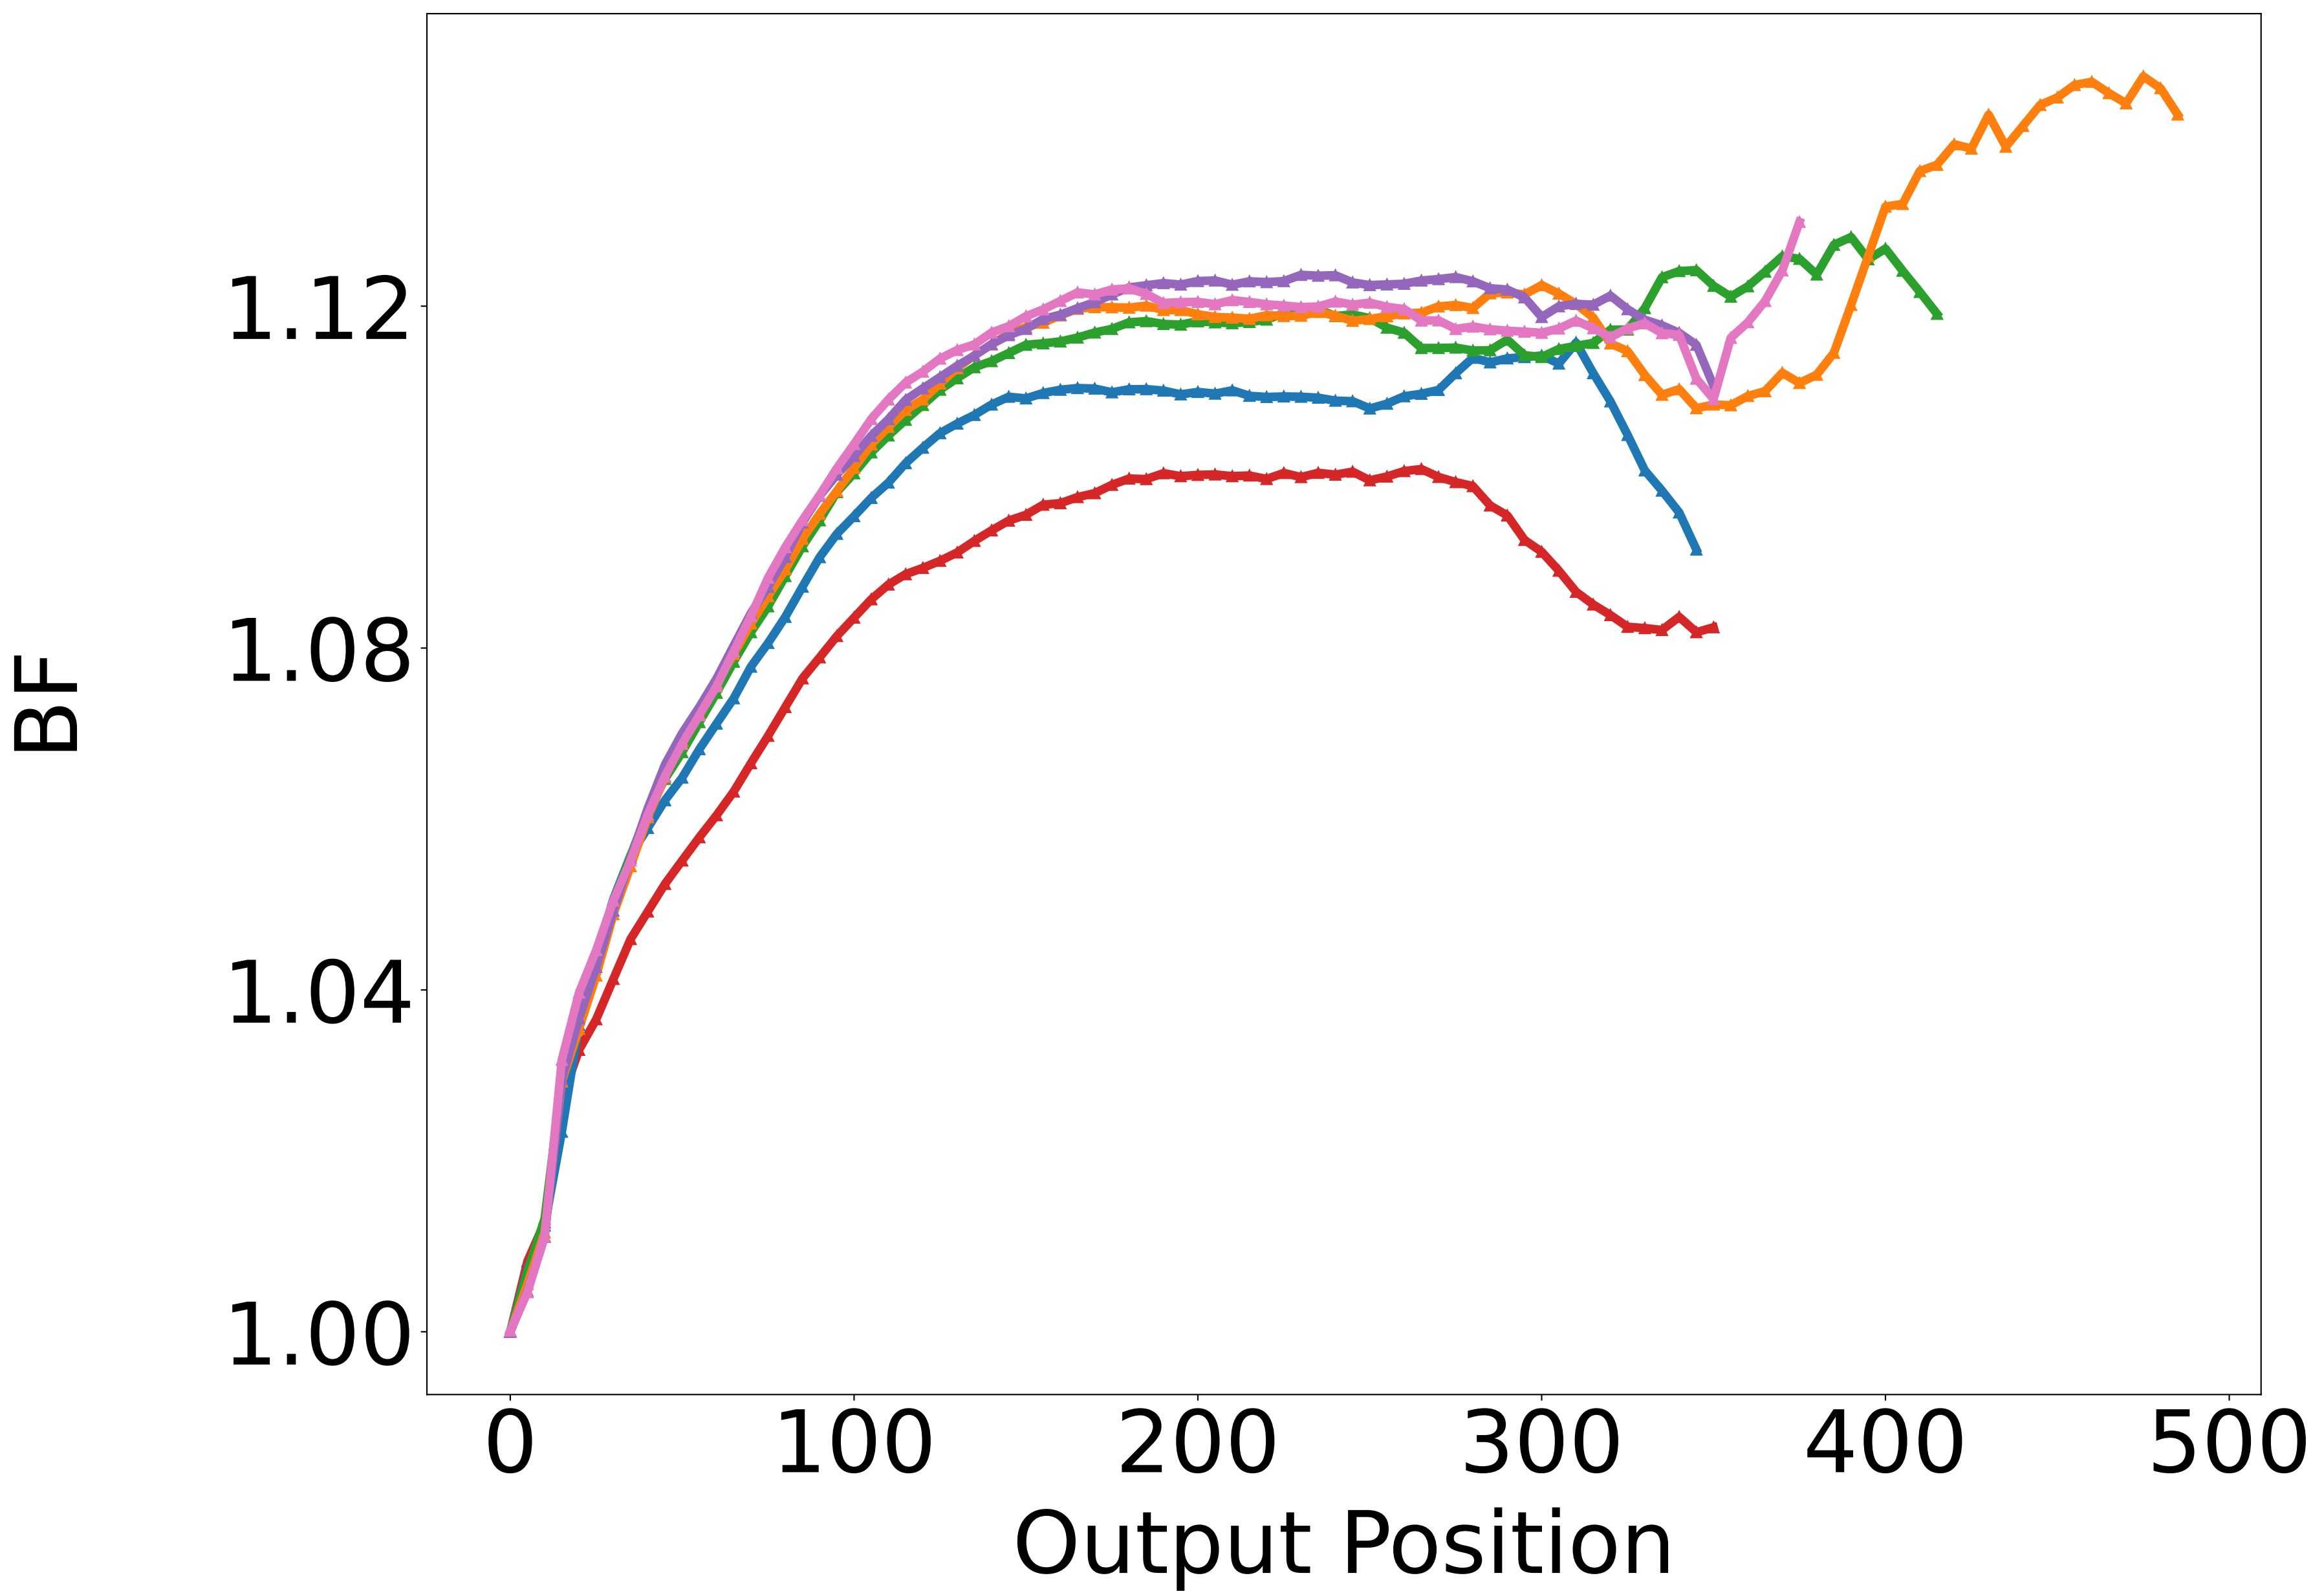

## Prompt Complexity (C)

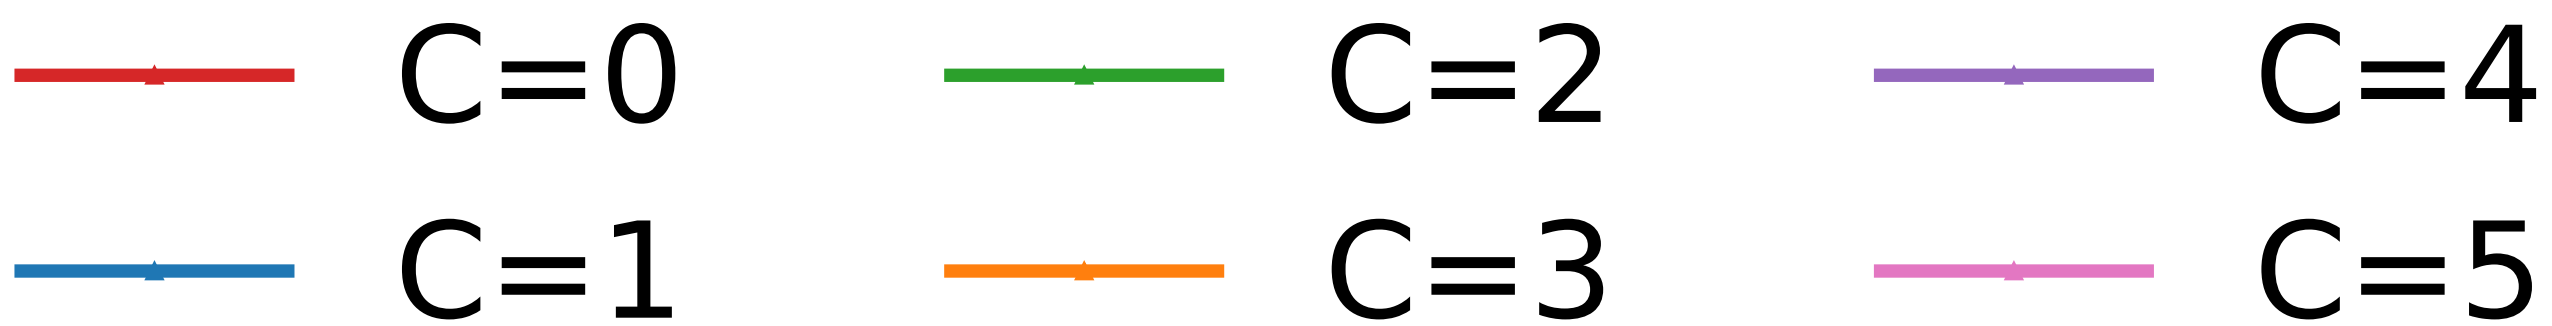

Supplement: supplementary_material [file piecewise_ebf_Llama-2-70B-chat_bf.pdf › supplementary_materials/bf_output_dynamic/cognac/piecewise_ebf_Llama-2-70B-chat_bf.pdf]

# Llama-2-70B-chat

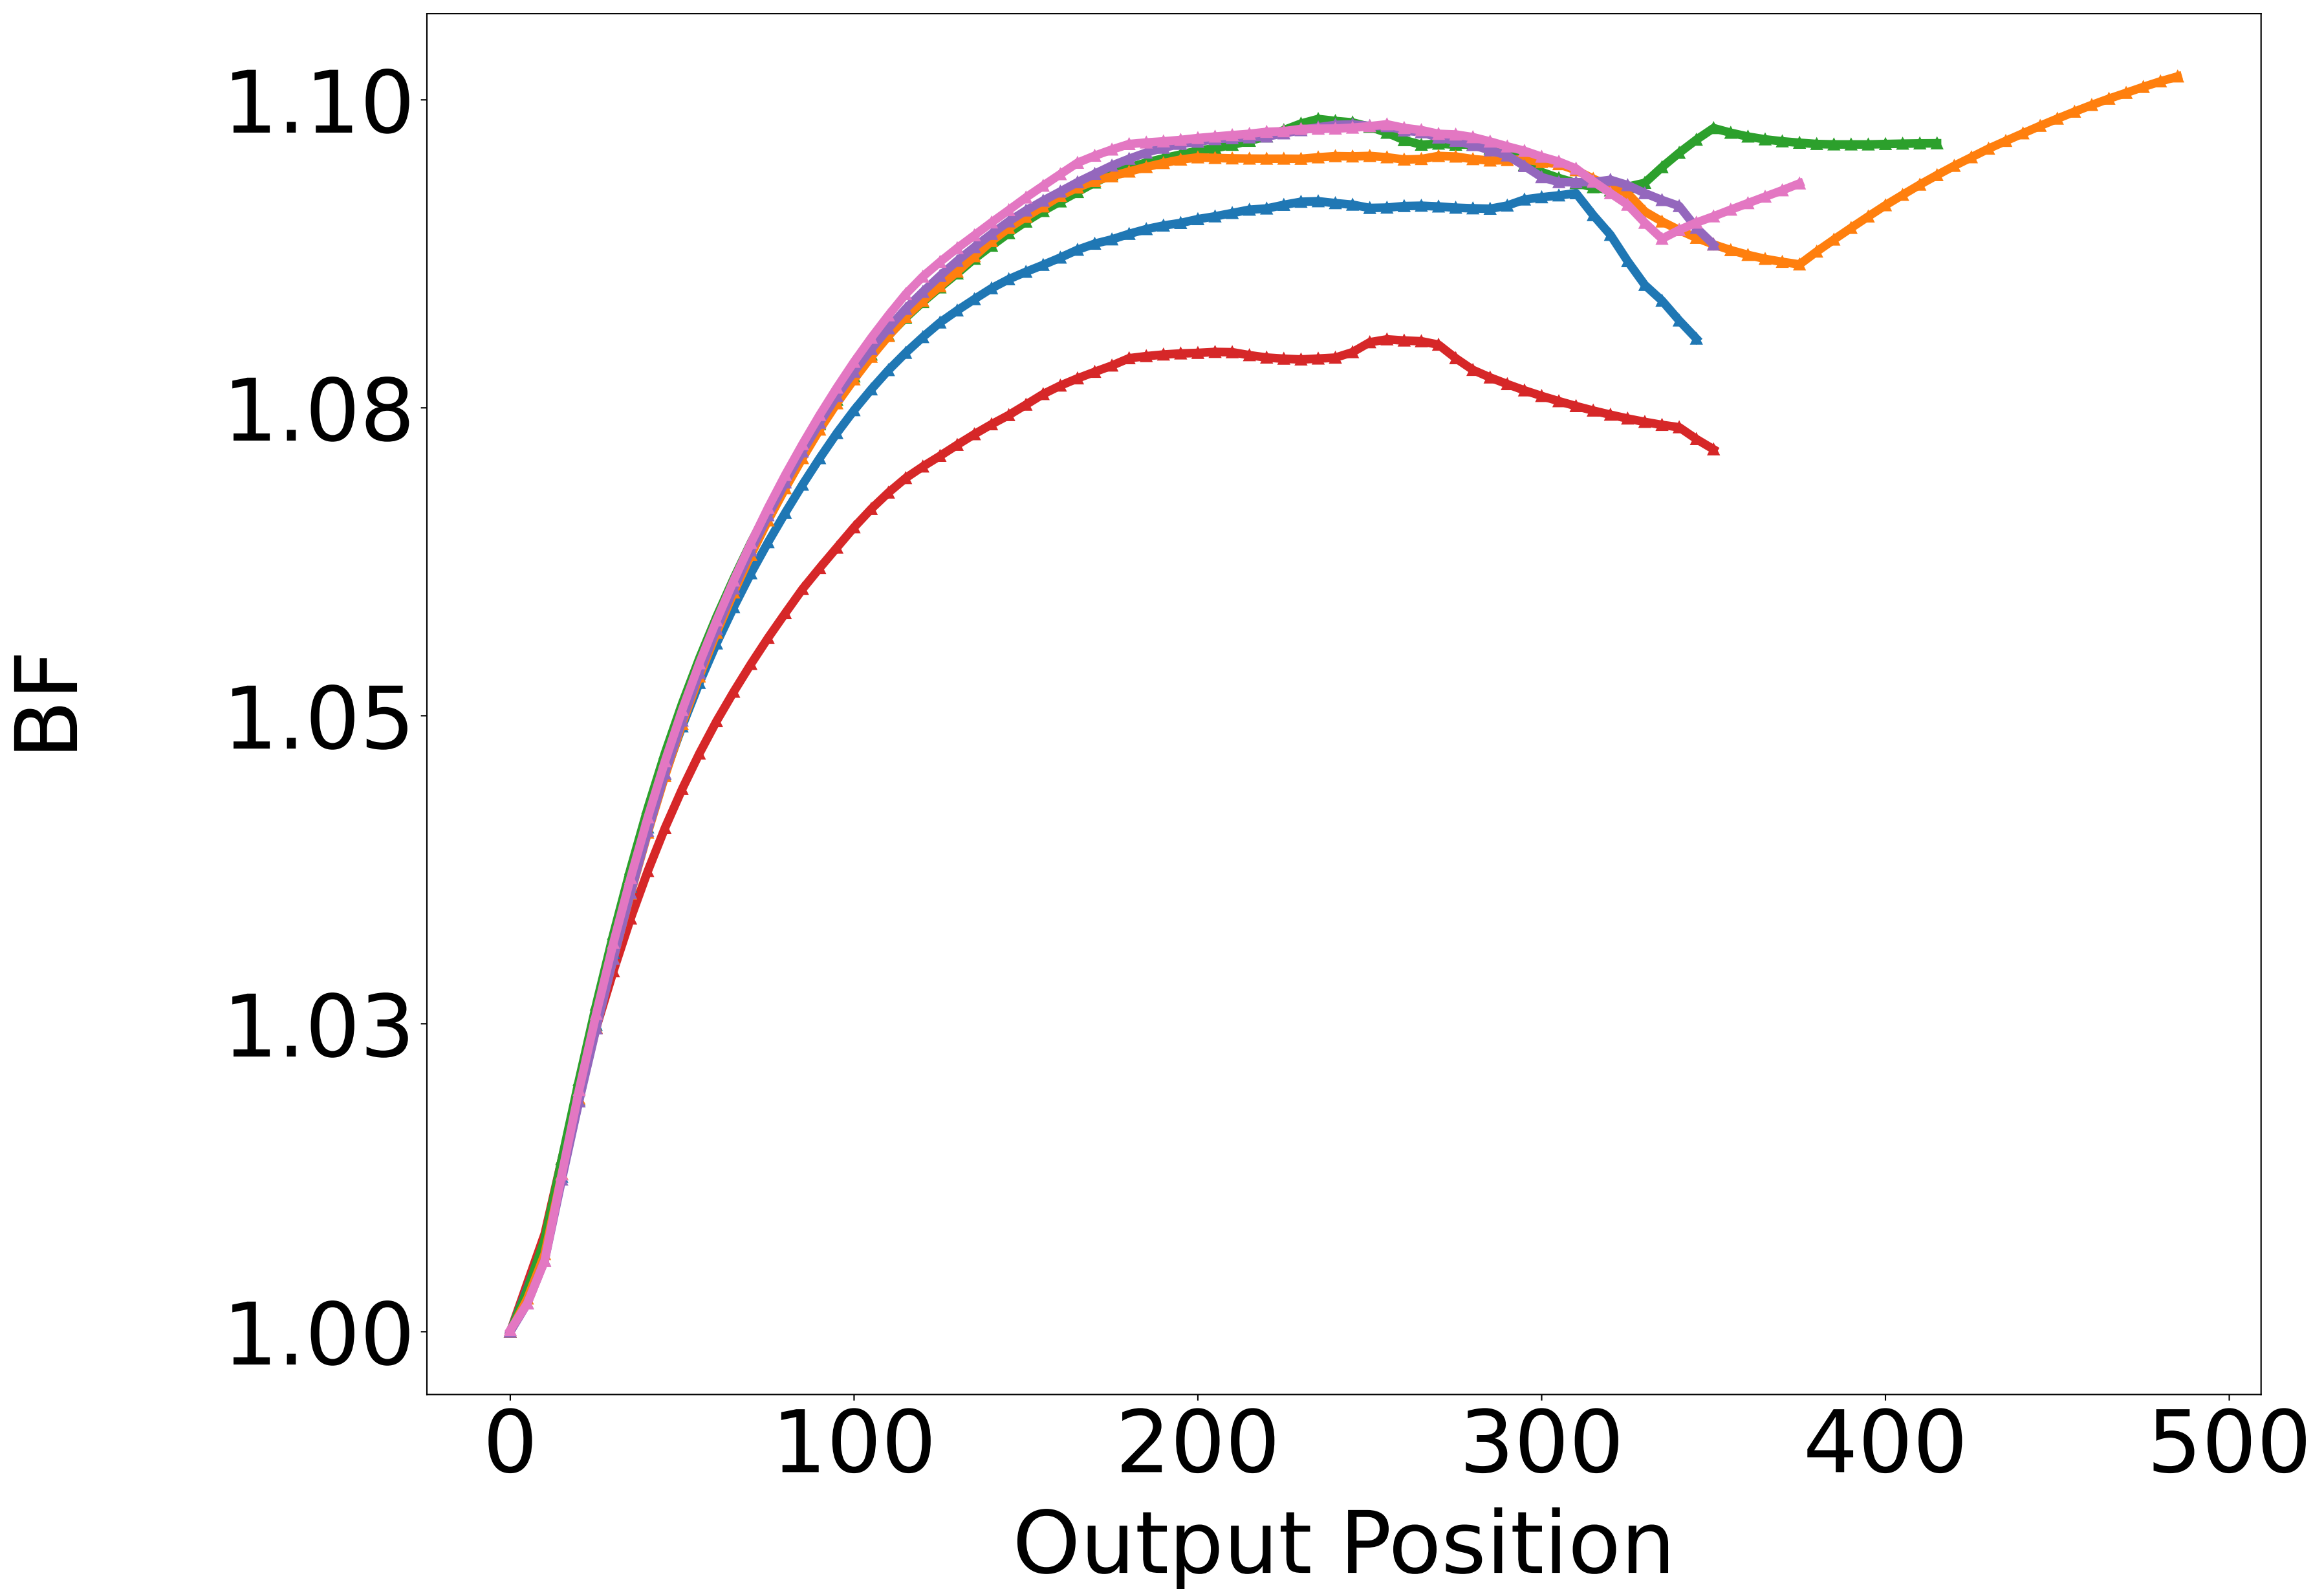

Prompt Complexity (C)

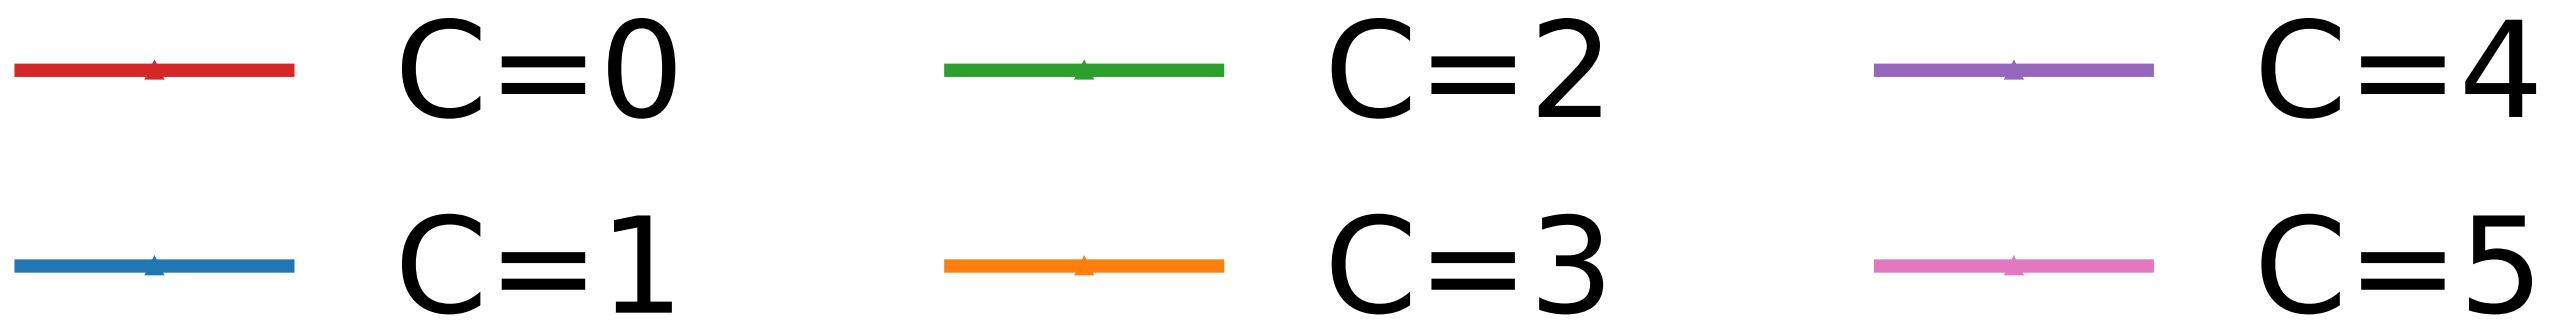

Supplement: supplementary_material [file piecewise_ebf_Llama-2-70B-chat_bf_fixed_start.pdf › supplementary_materials/bf_output_dynamic/cognac/piecewise_ebf_Llama-2-70B-chat_bf_fixed_start.pdf]

# Llama-2-70B

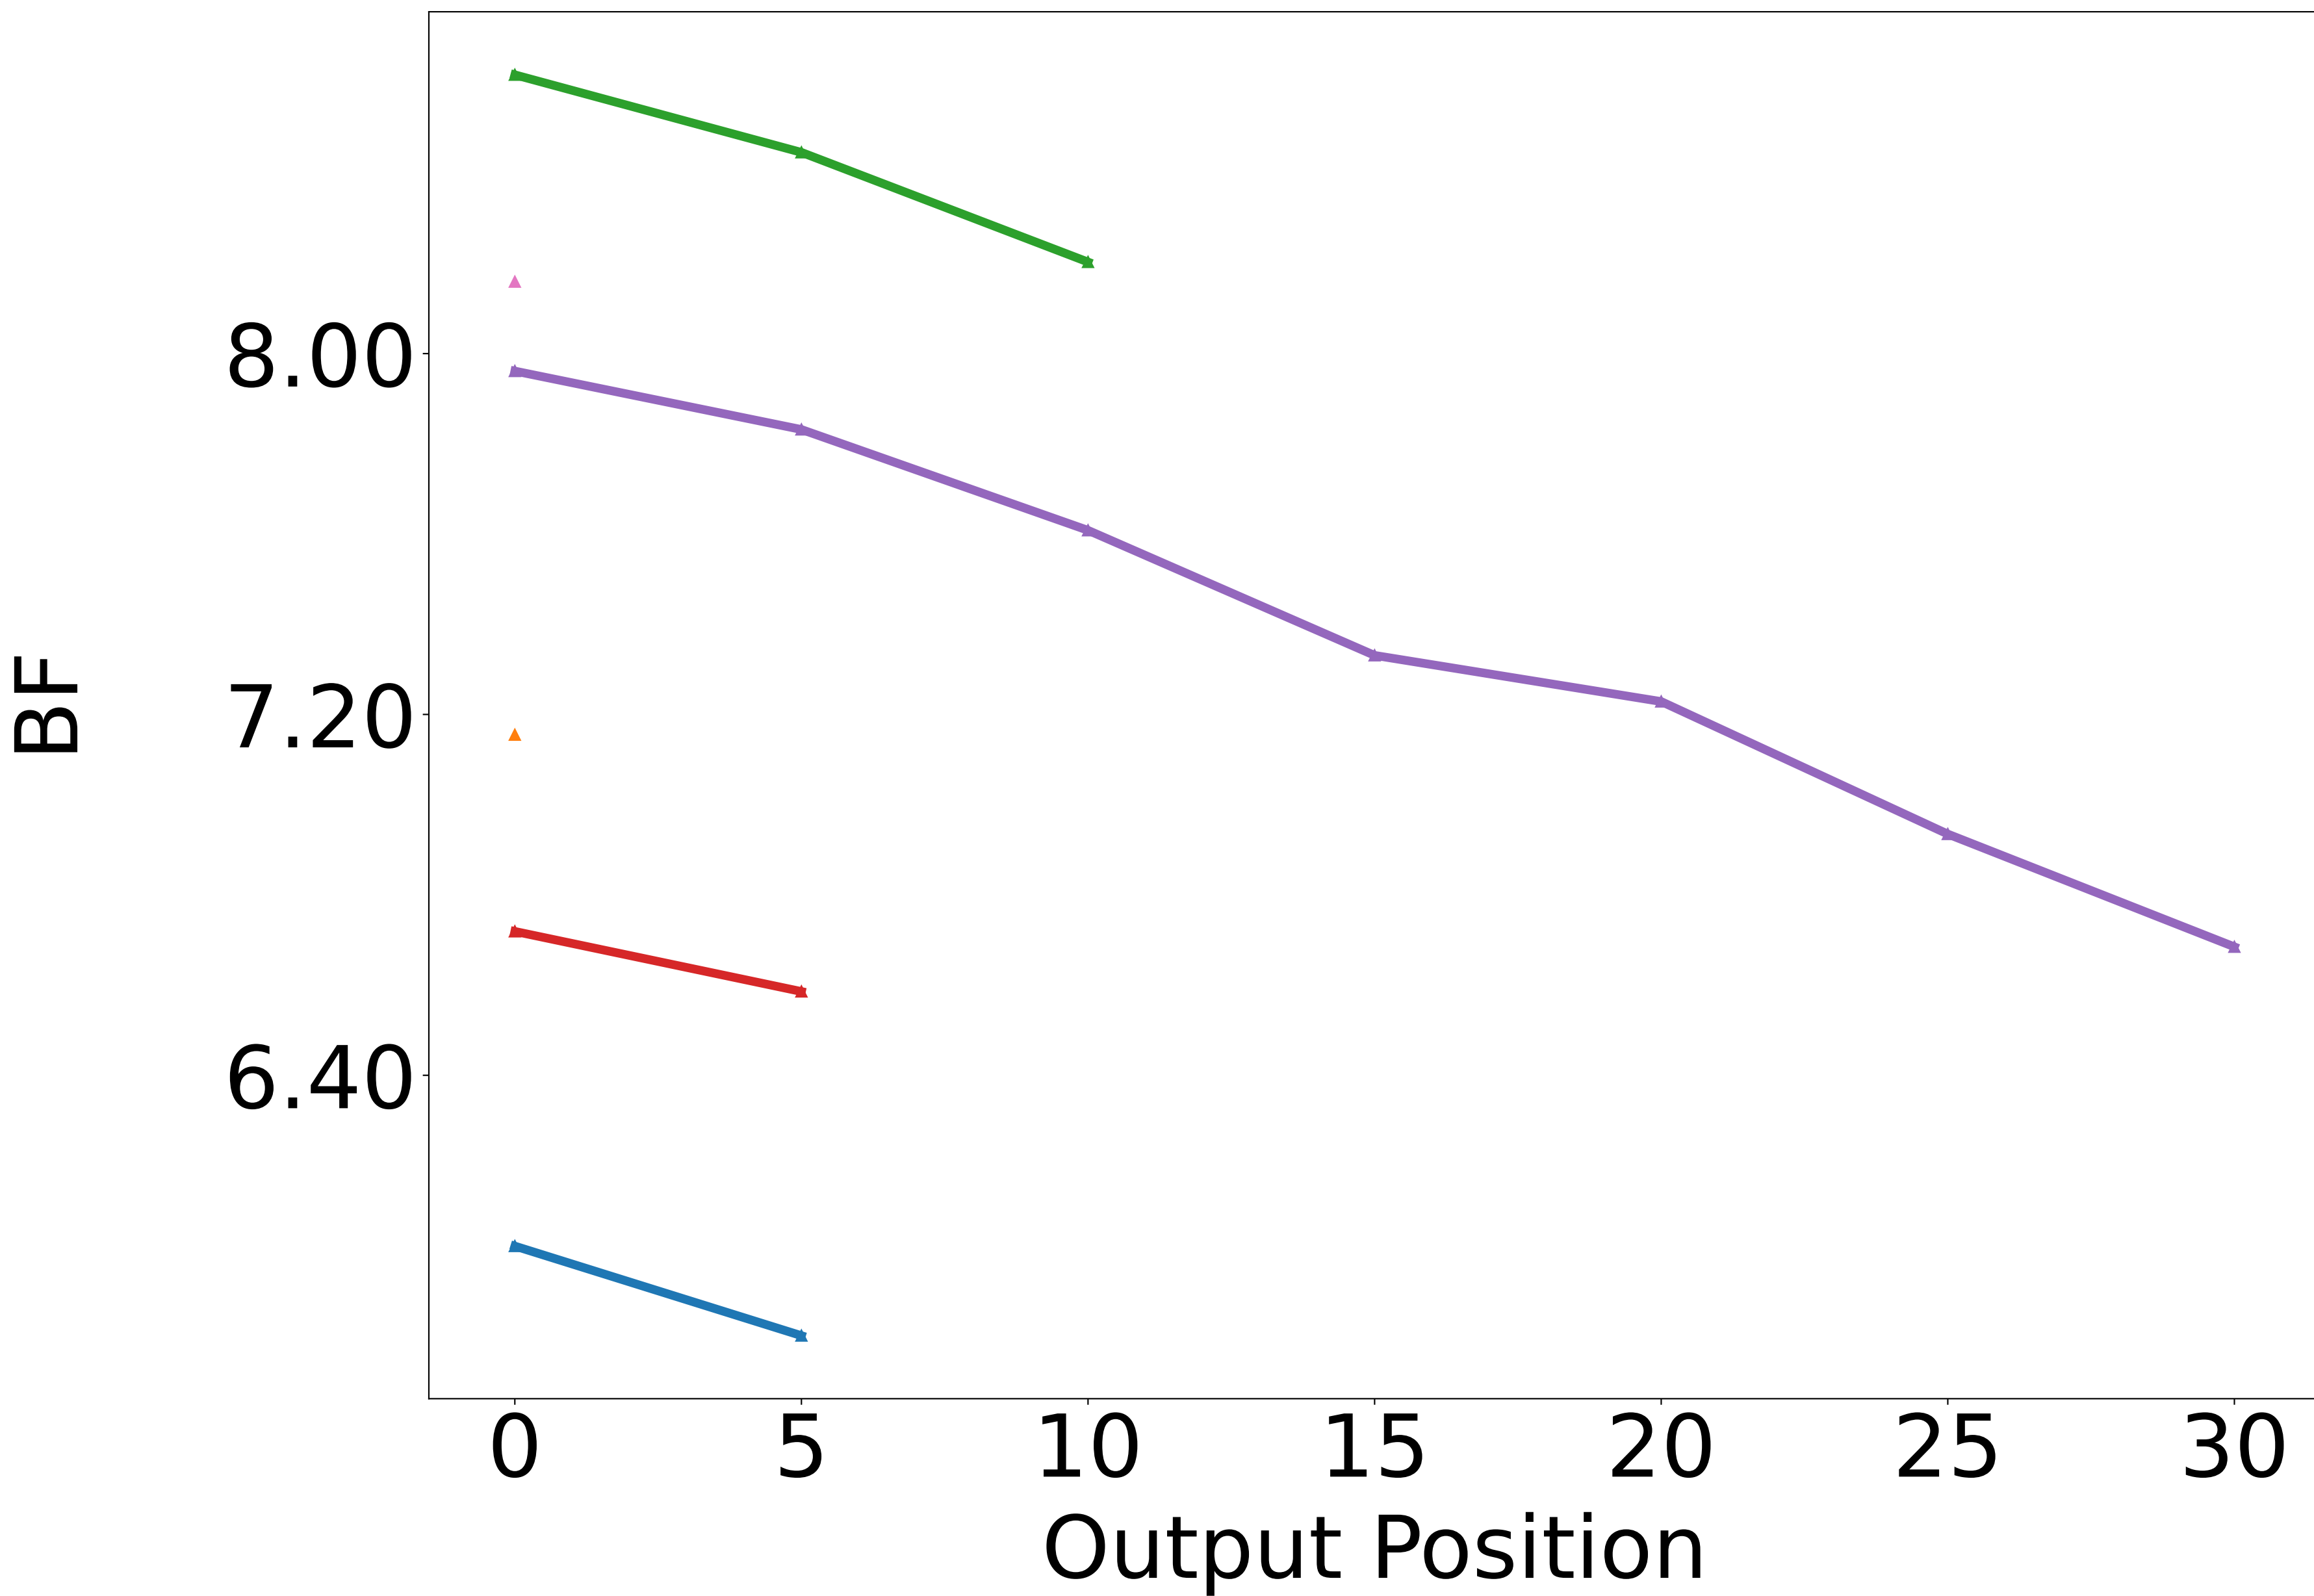

## Prompt Complexity (C)



Supplement: supplementary_material [file piecewise_ebf_Llama-2-70B_bf.pdf › supplementary_materials/bf_output_dynamic/cognac/piecewise_ebf_Llama-2-70B_bf.pdf]

# Llama-2-70B

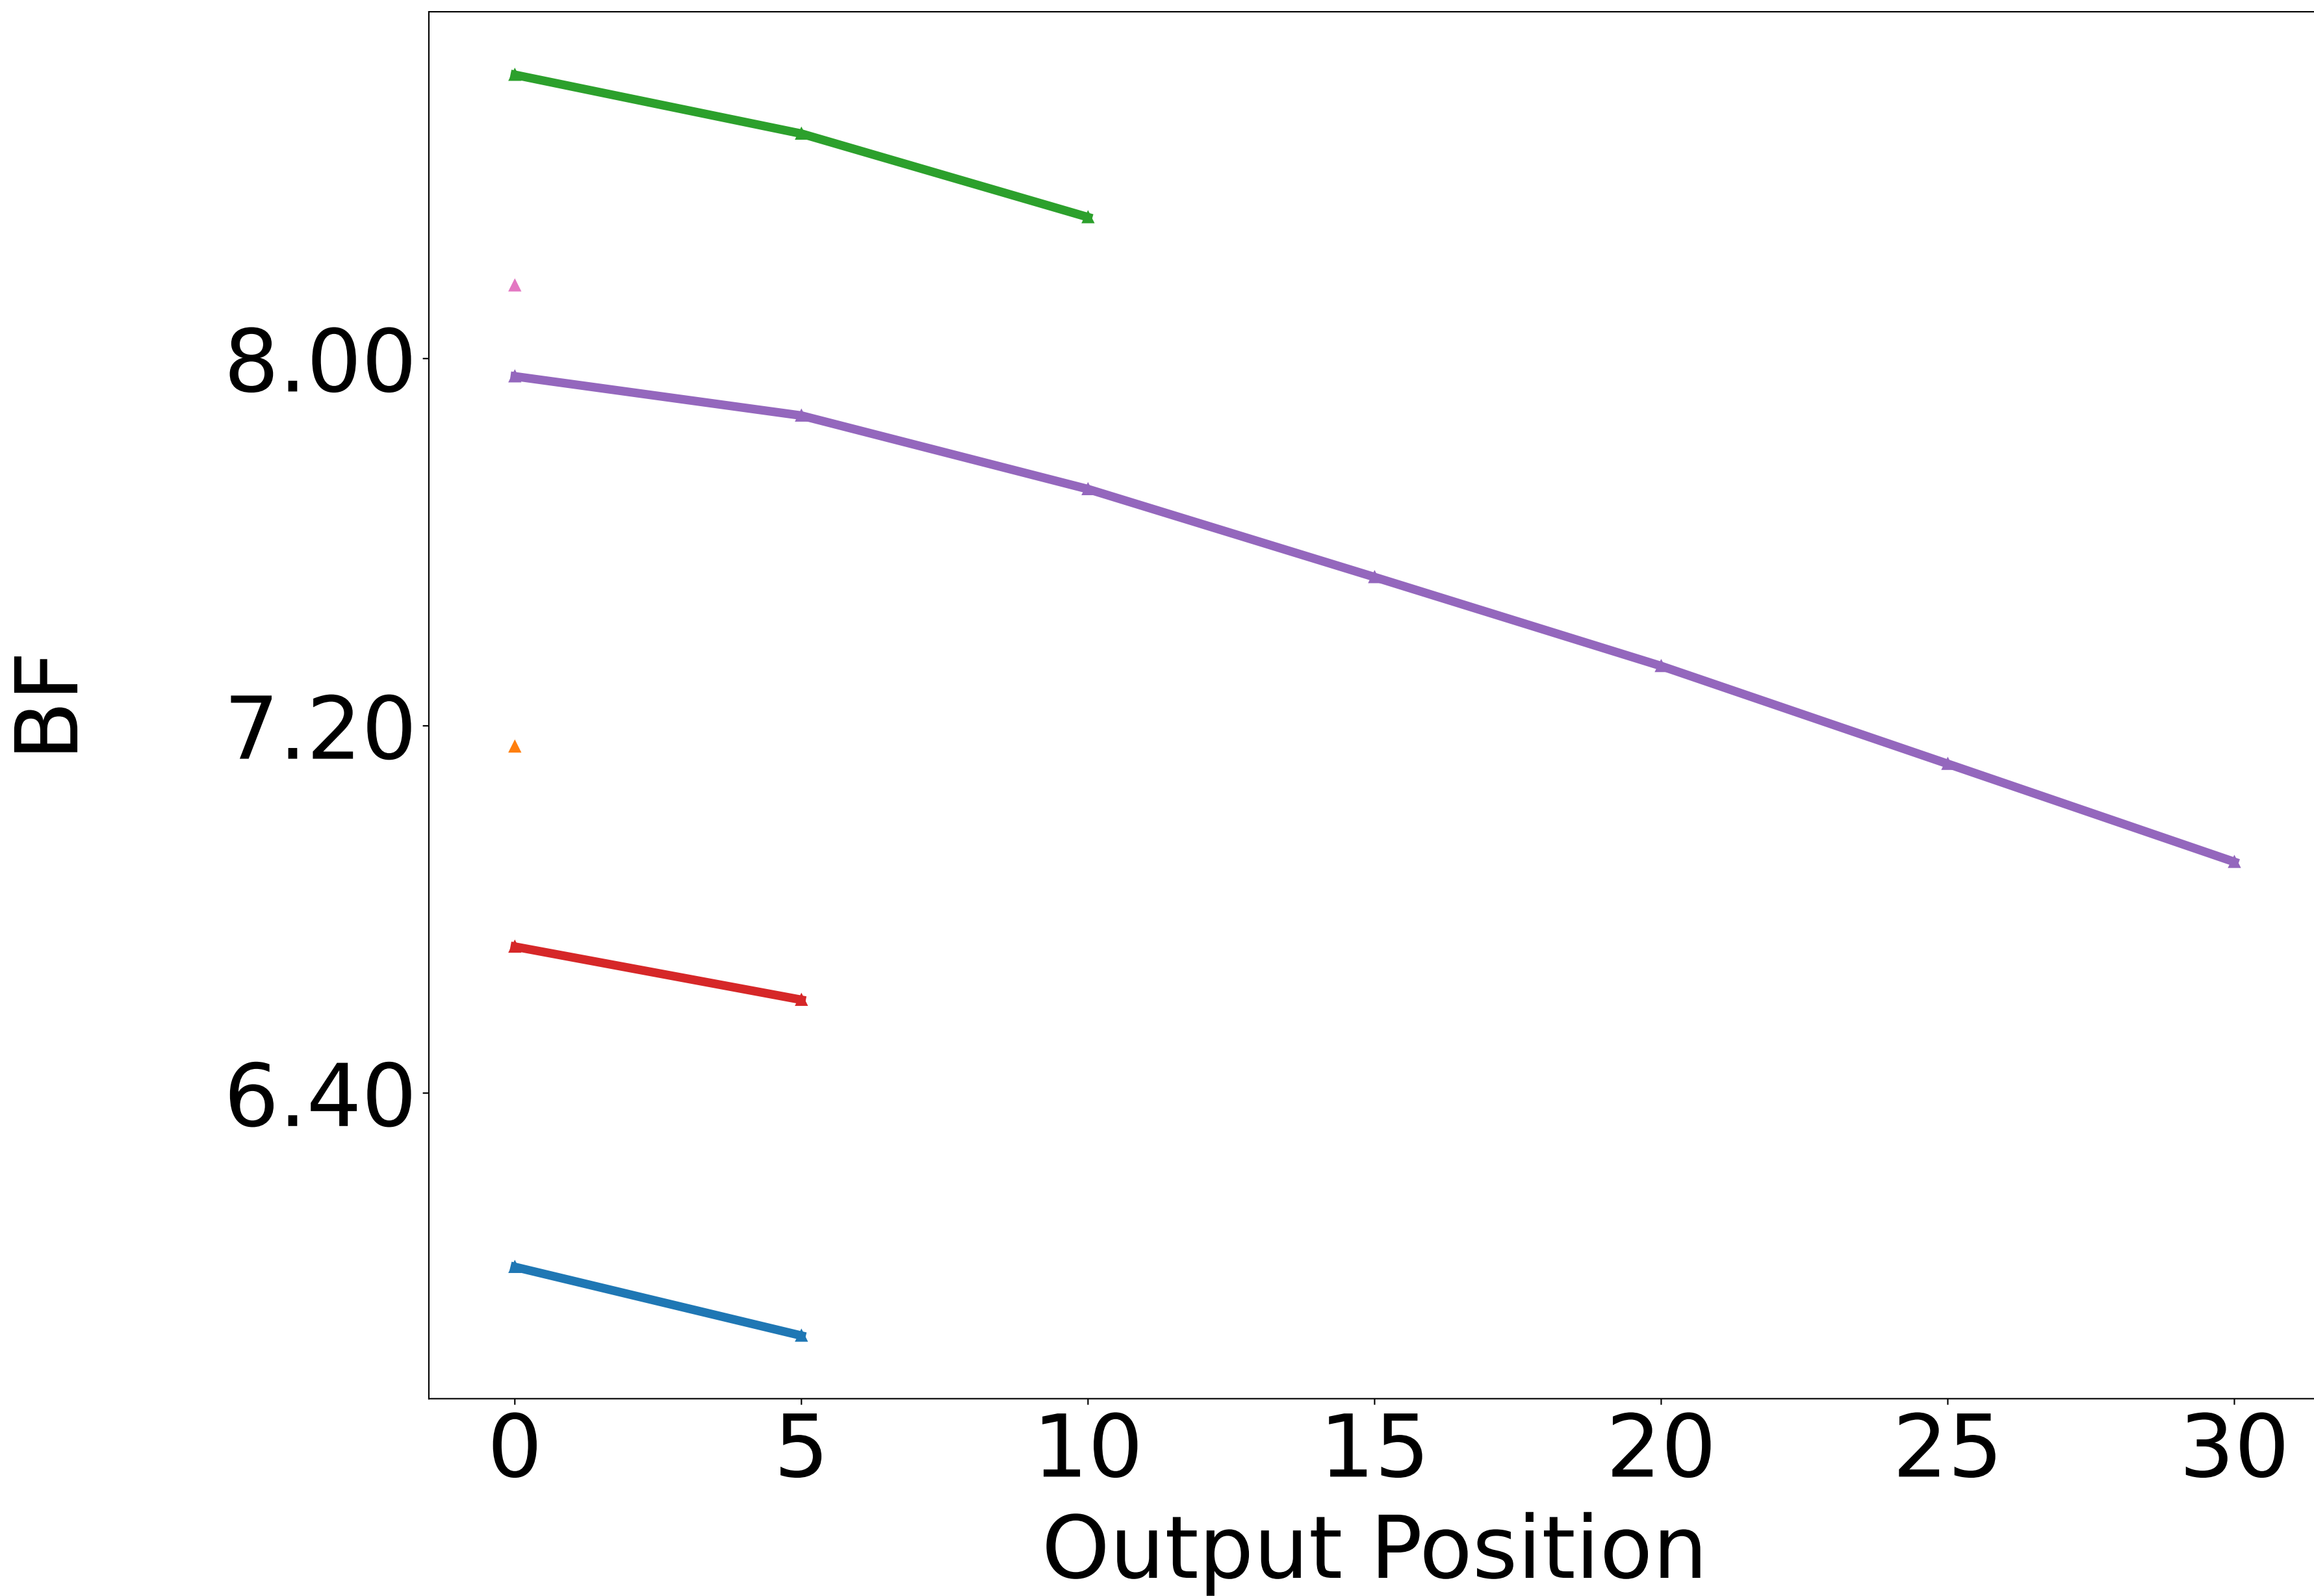

## Prompt Complexity (C)



Supplement: supplementary_material [file piecewise_ebf_Llama-2-70B_bf_fixed_start.pdf › supplementary_materials/bf_output_dynamic/cognac/piecewise_ebf_Llama-2-70B_bf_fixed_start.pdf]

# Llama-3-70B-Instruct

BF

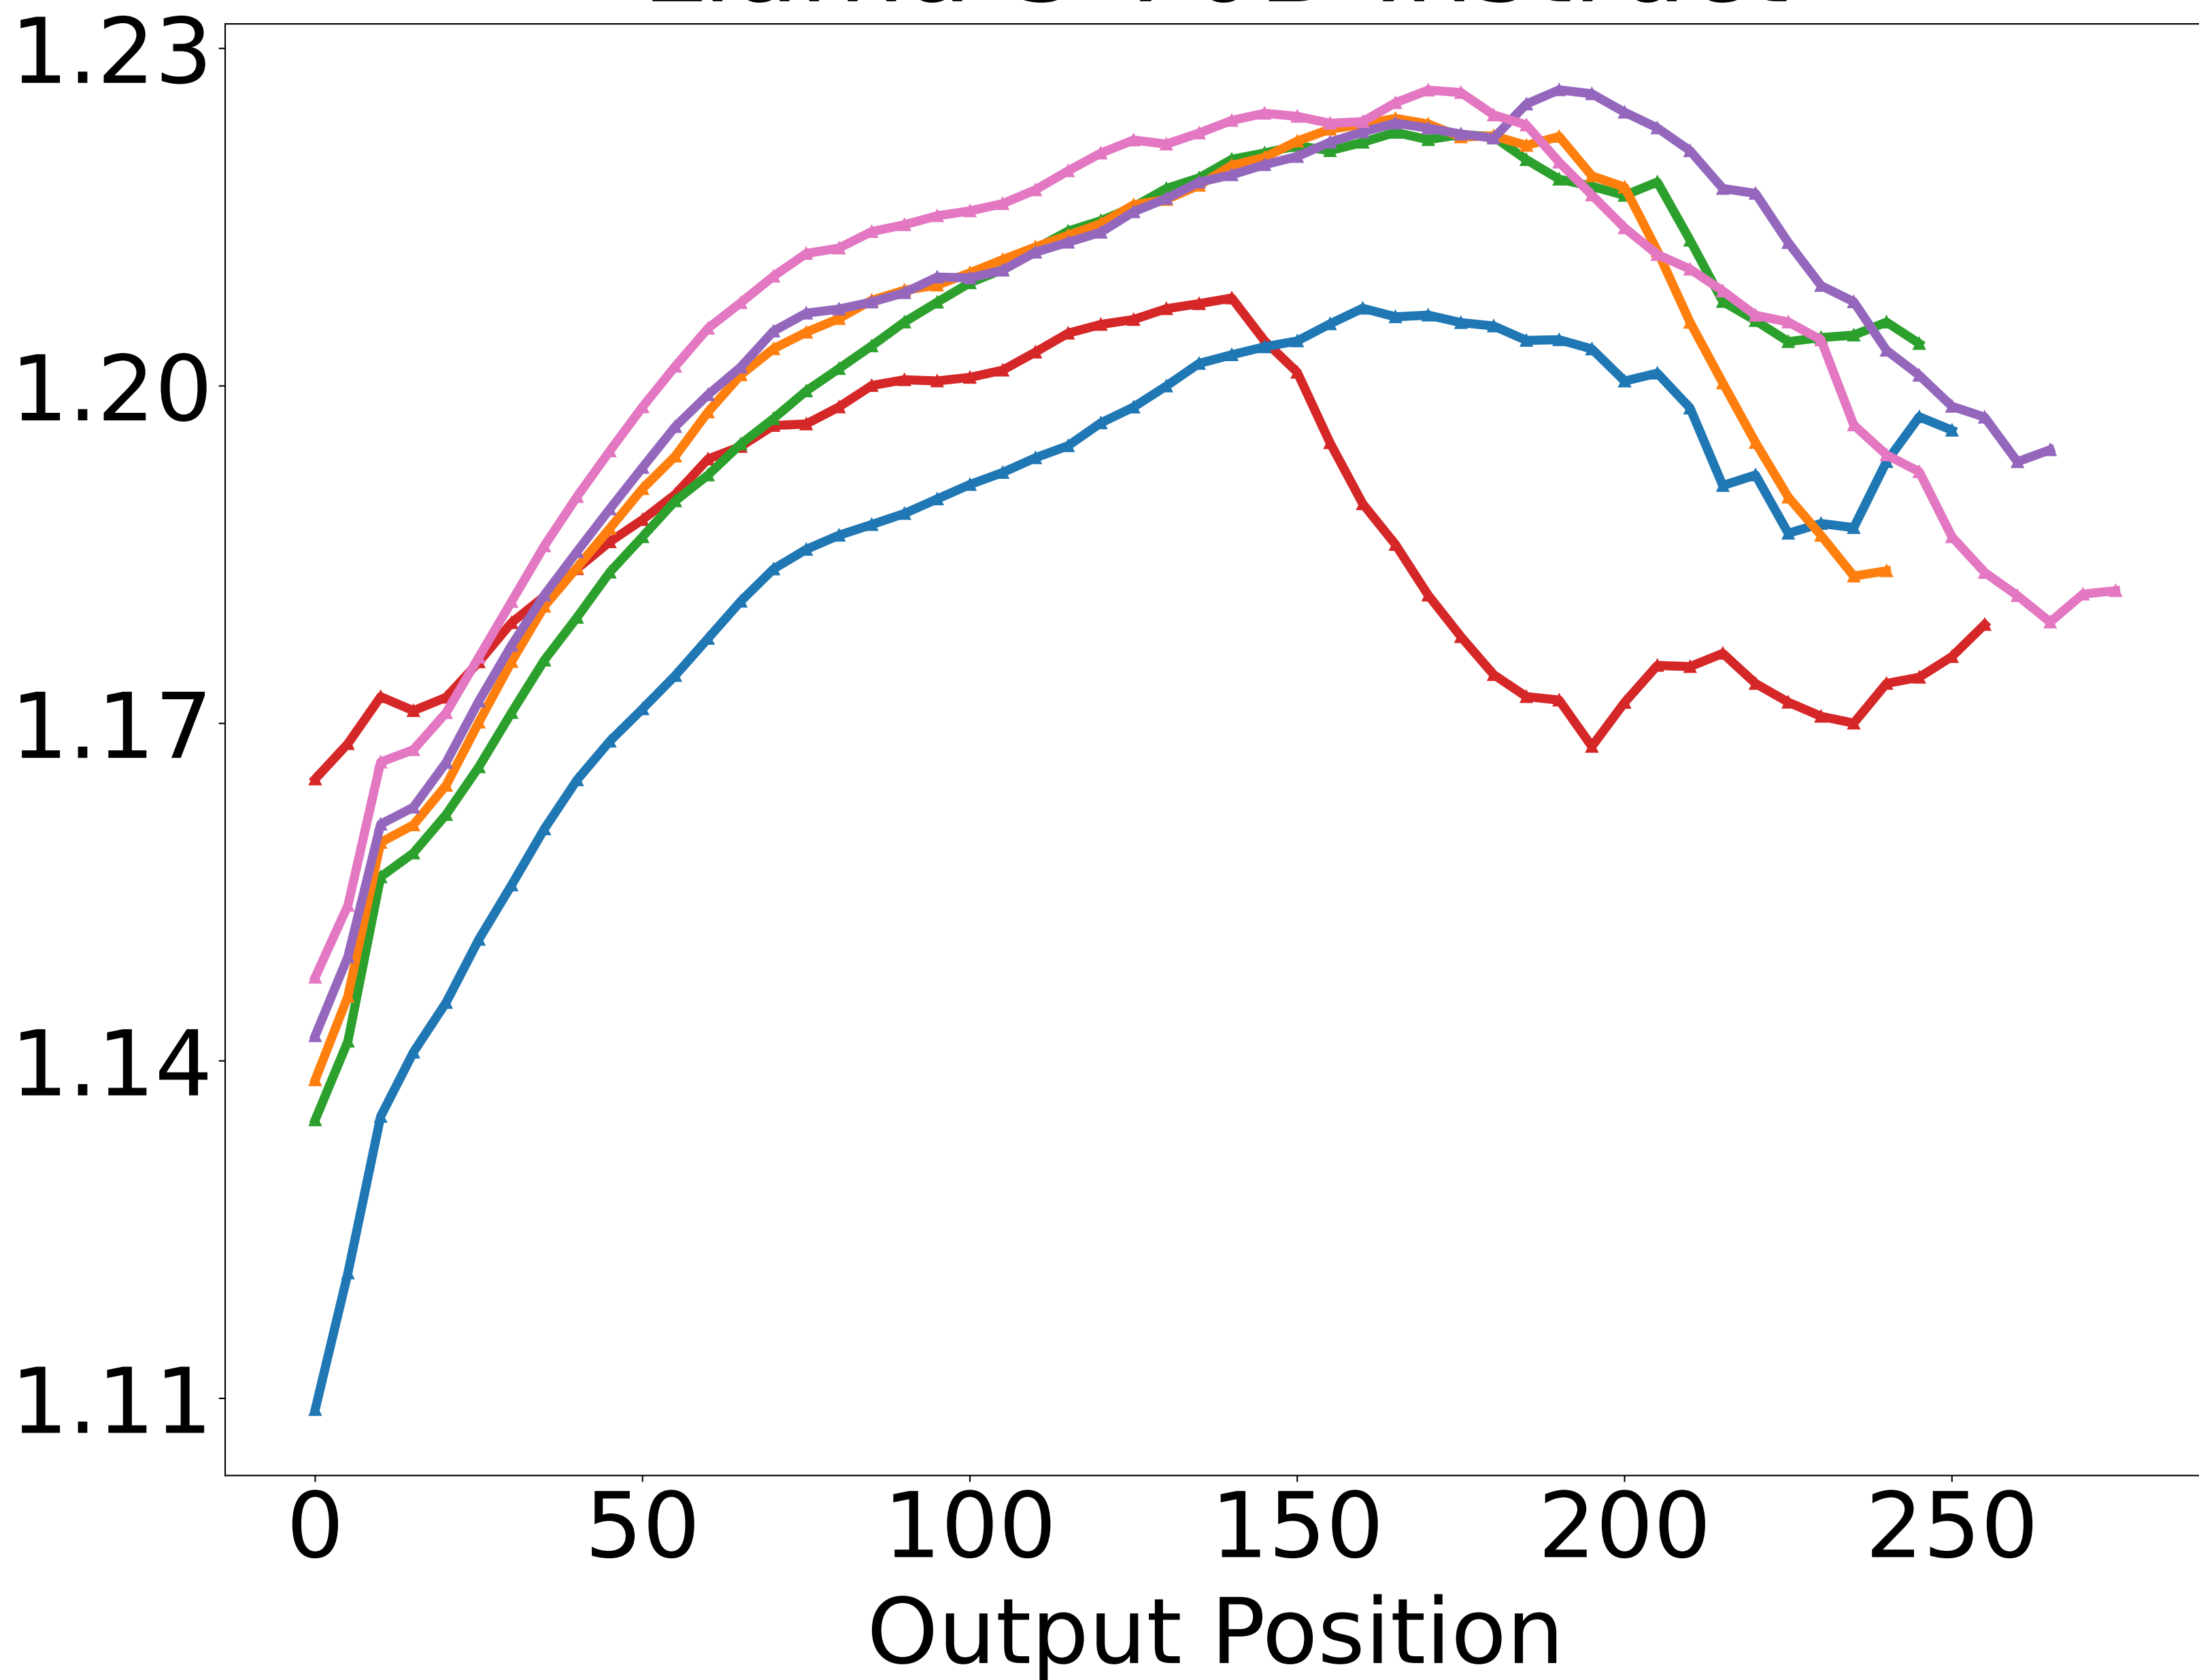

Prompt Complexity (C)

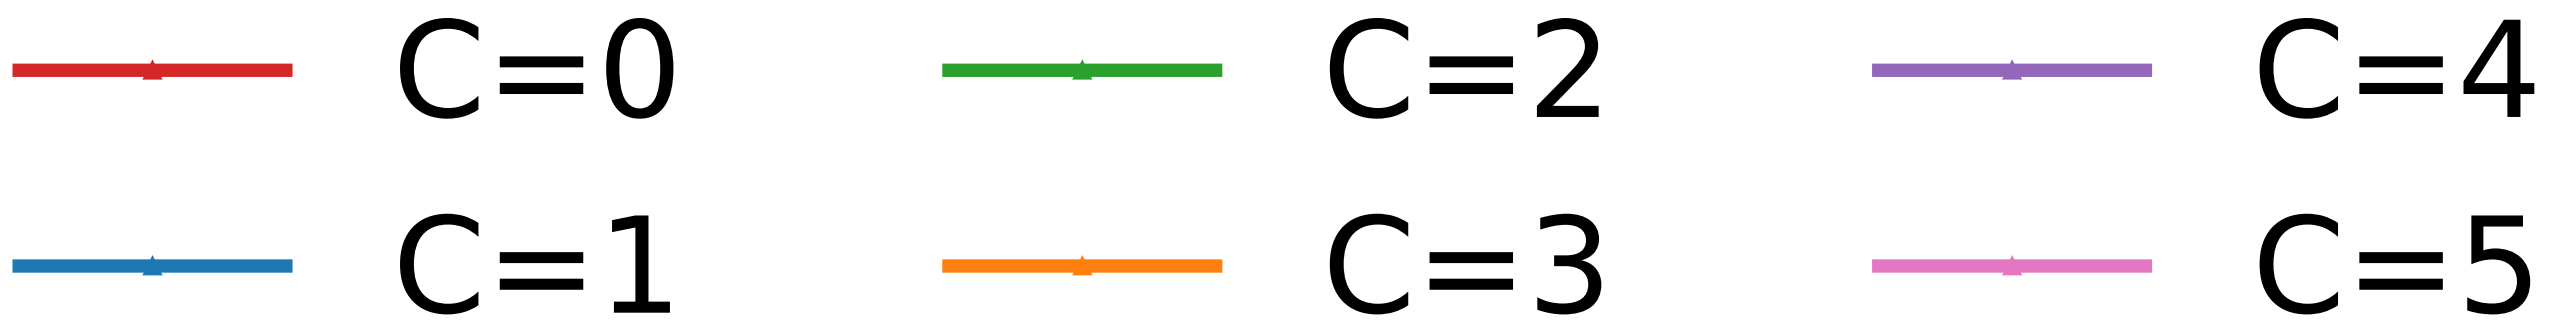

Supplement: supplementary_material [file piecewise_ebf_Llama-3-70B-Instruct_bf.pdf › supplementary_materials/bf_output_dynamic/cognac/piecewise_ebf_Llama-3-70B-Instruct_bf.pdf]

# Llama-3-70B-Instruct

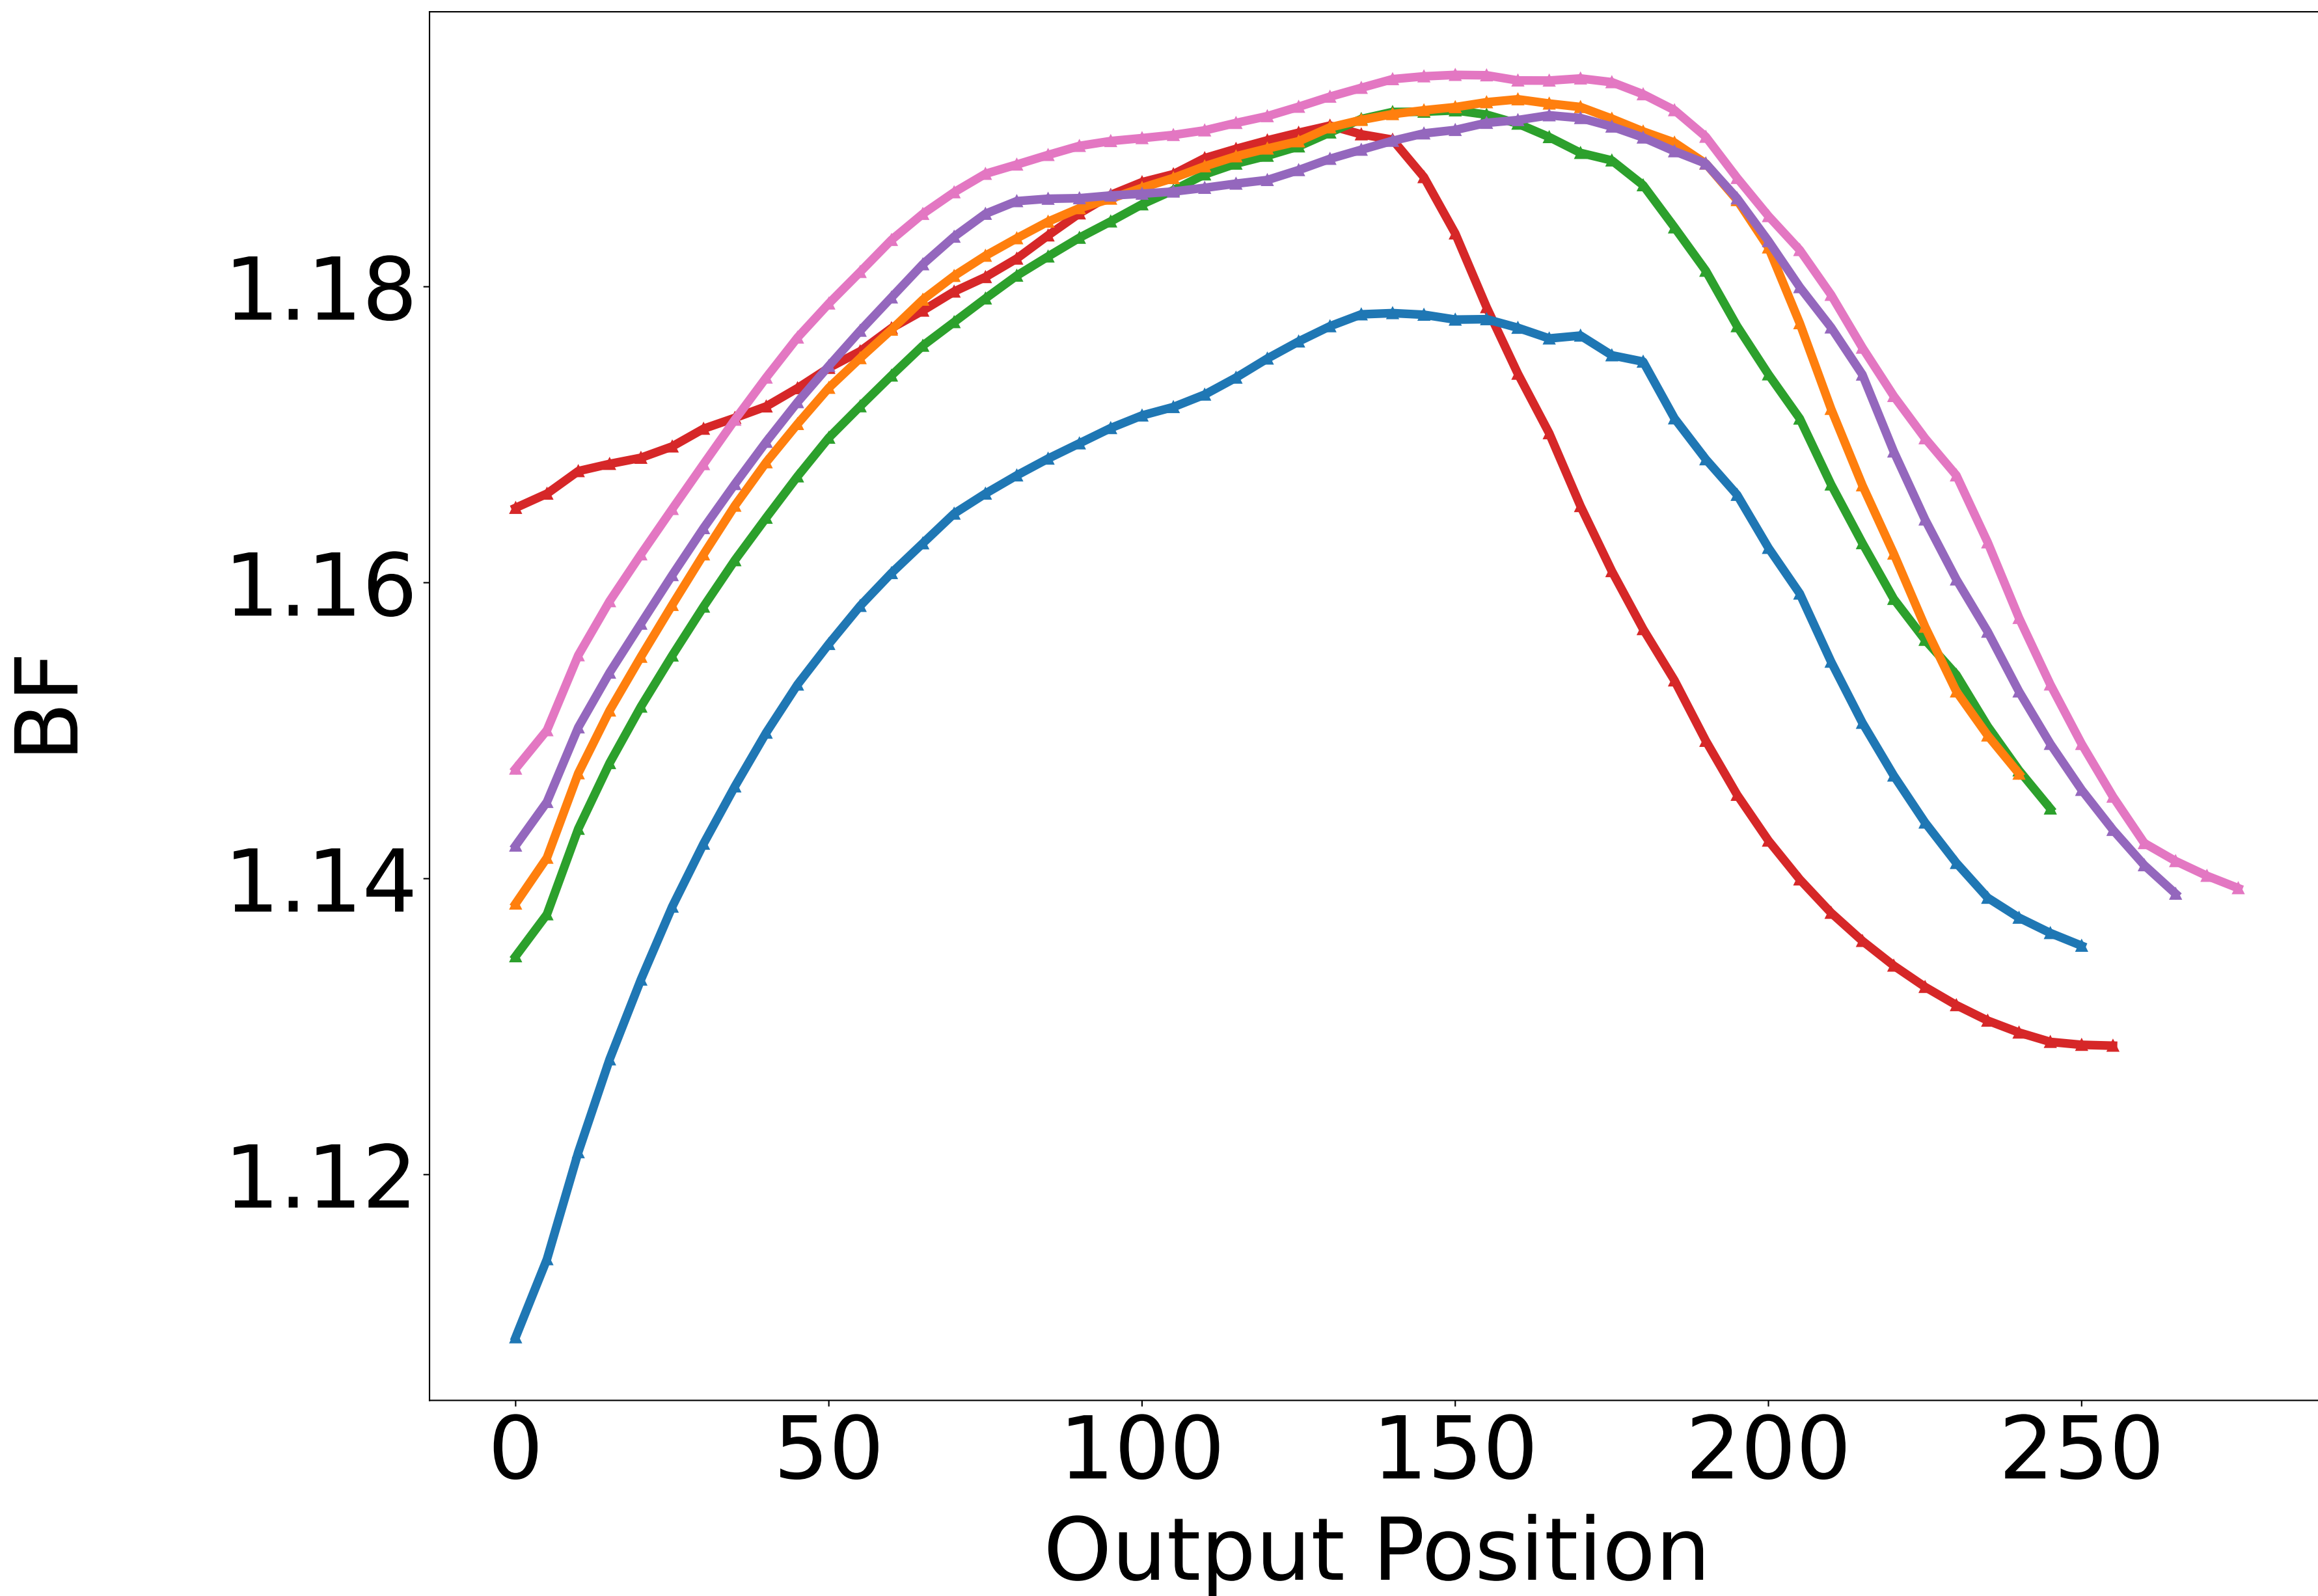

## Prompt Complexity (C)

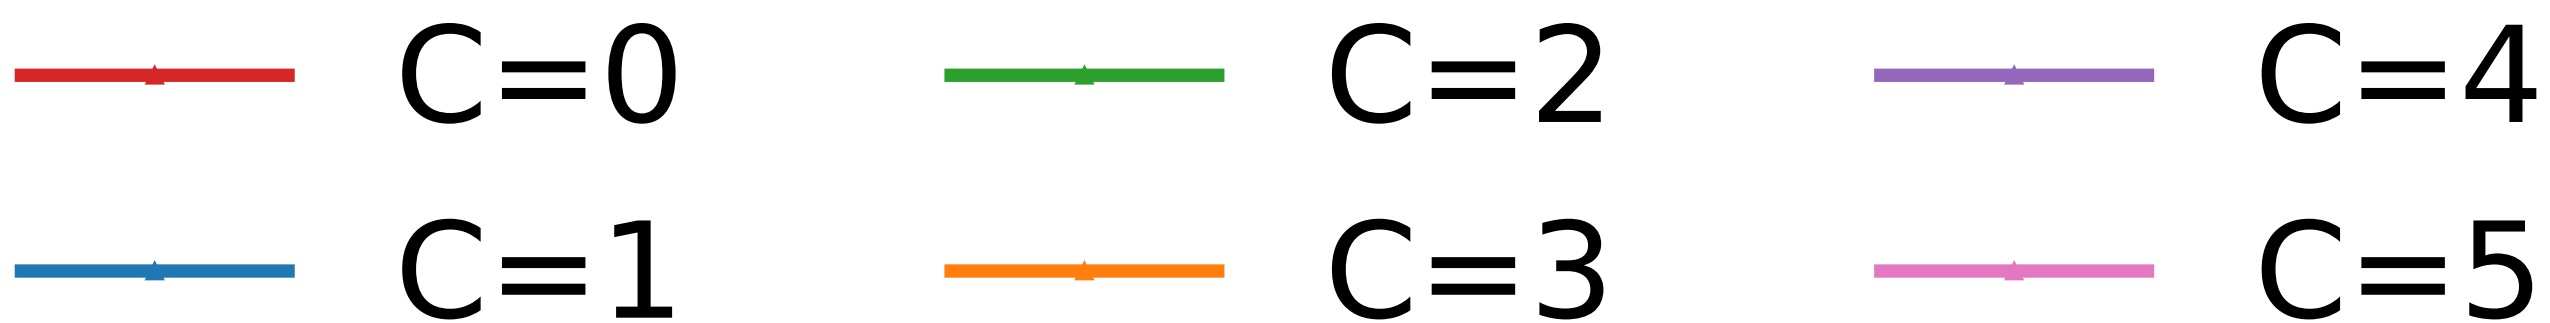

Supplement: supplementary_material [file piecewise_ebf_Llama-3-70B-Instruct_bf_fixed_start.pdf › supplementary_materials/bf_output_dynamic/cognac/piecewise_ebf_Llama-3-70B-Instruct_bf_fixed_start.pdf]

# Llama-3-70B

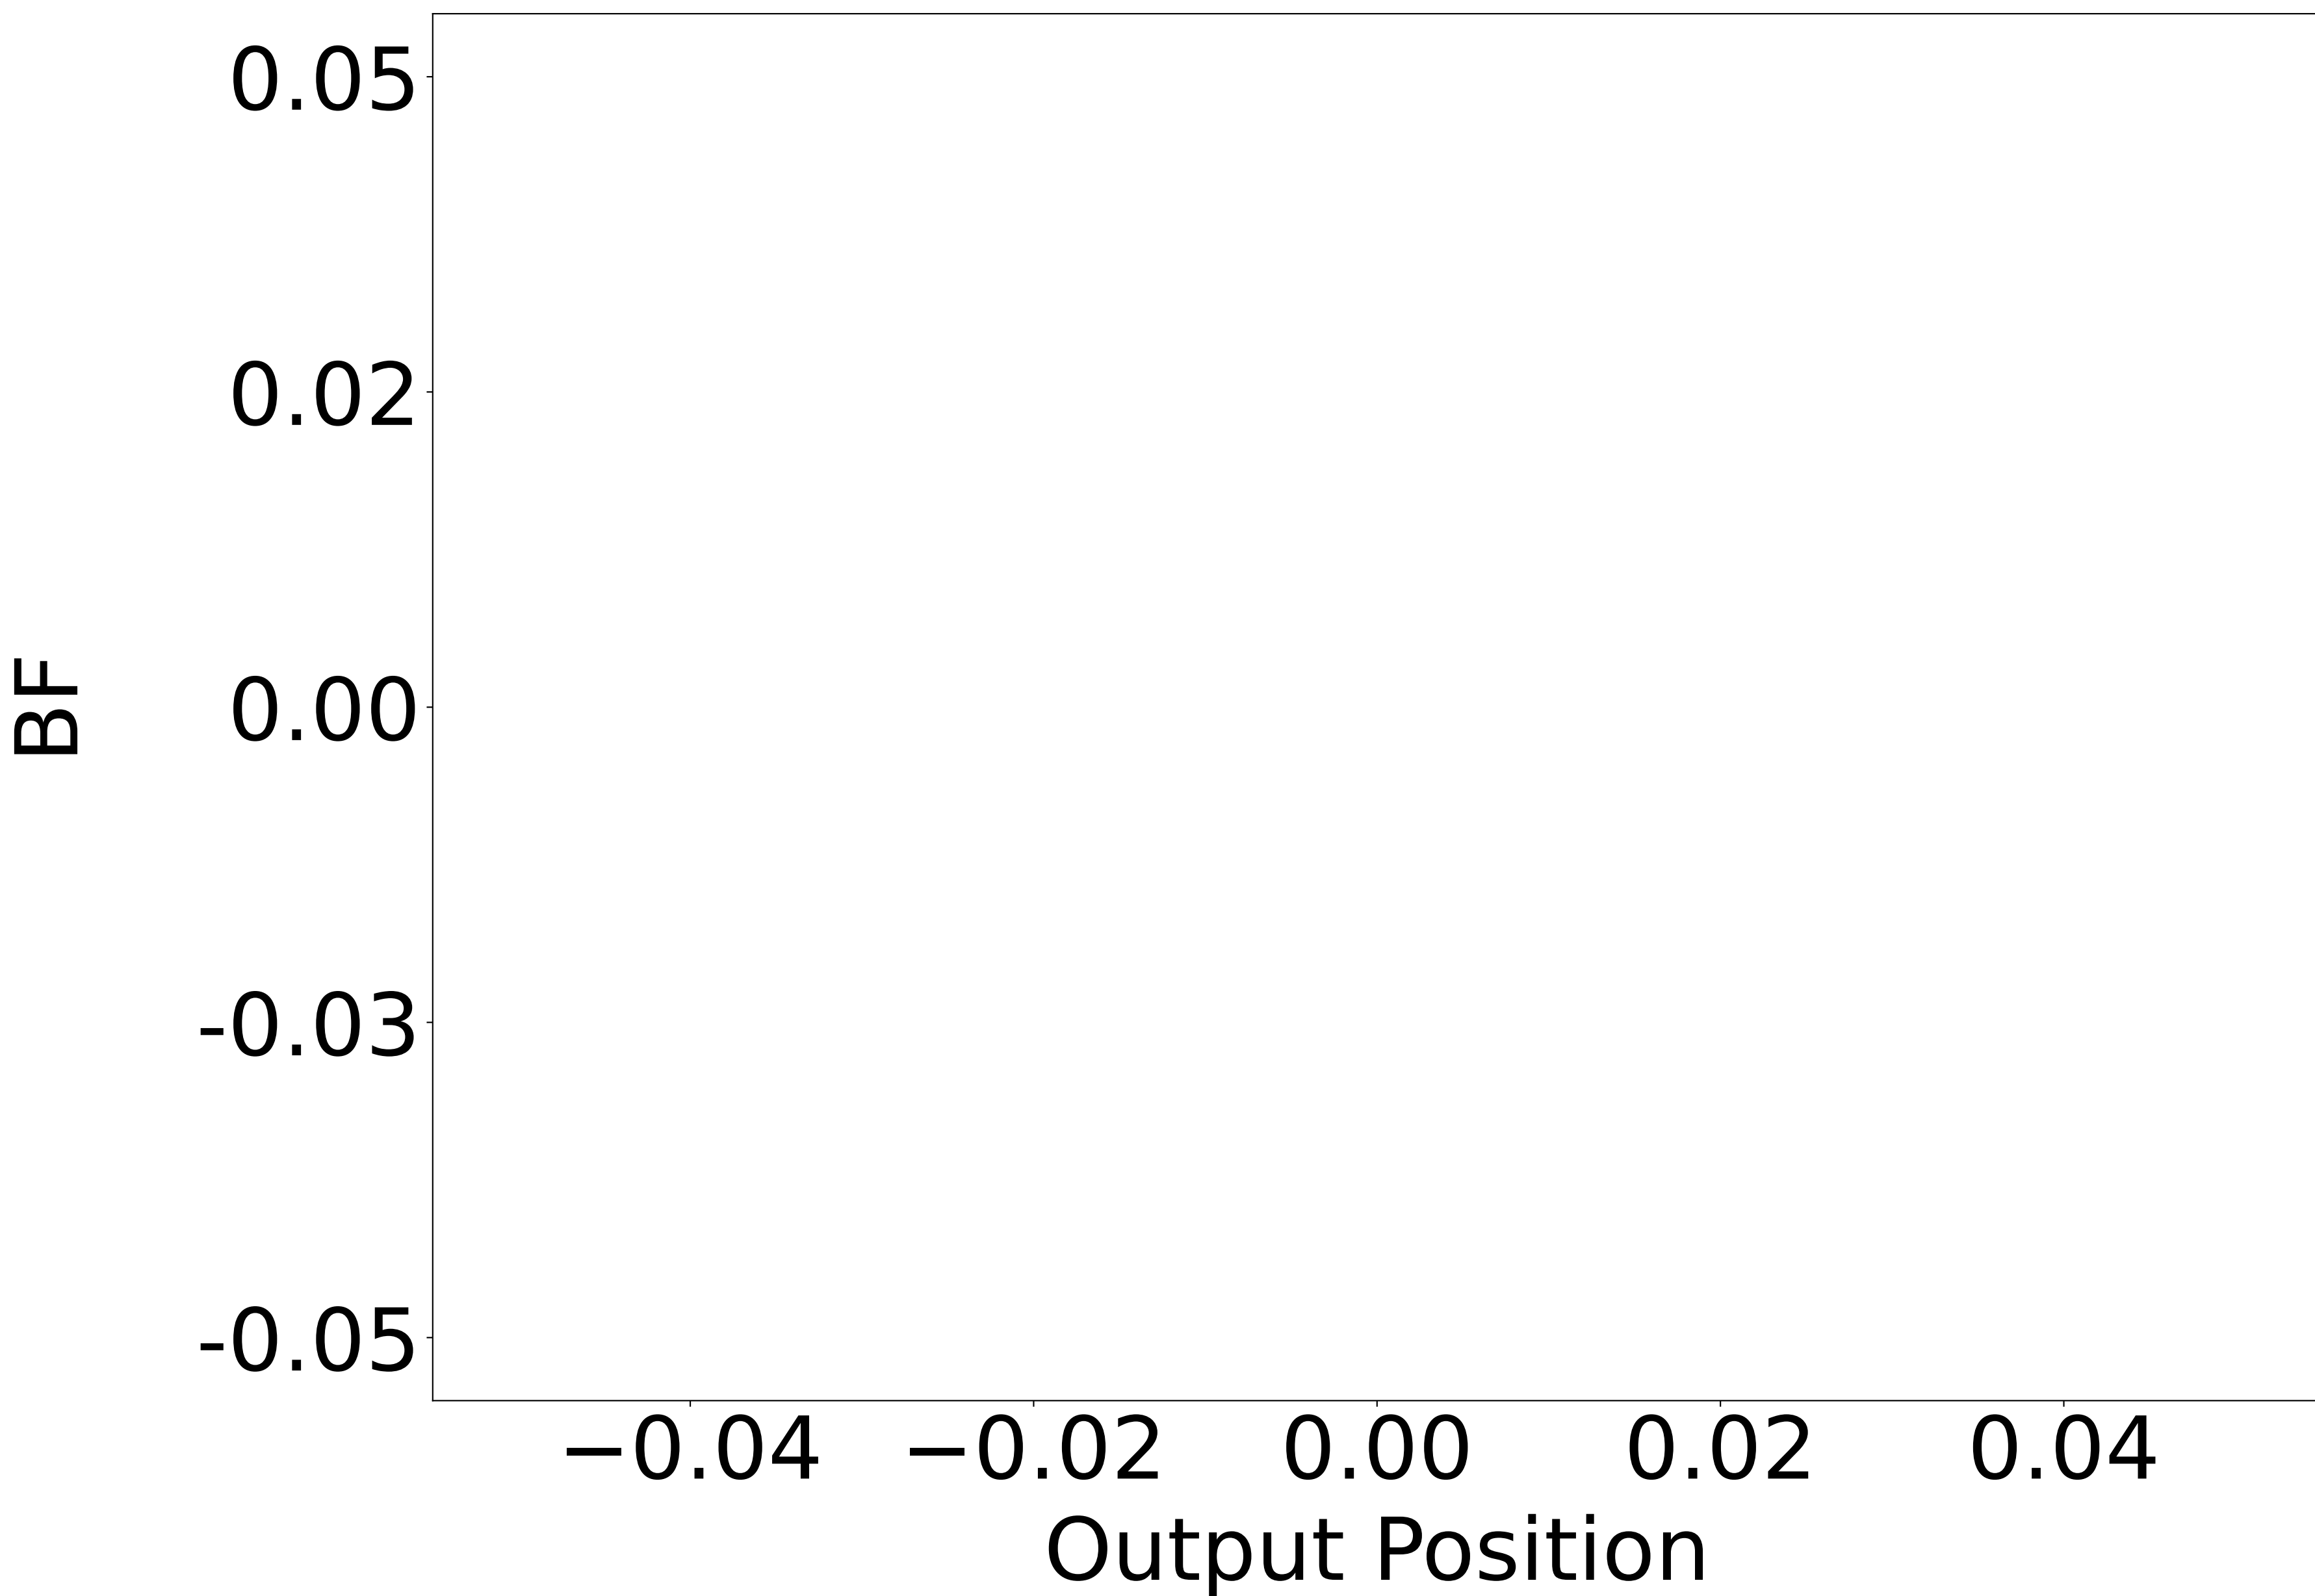

## Prompt Complexity (C)

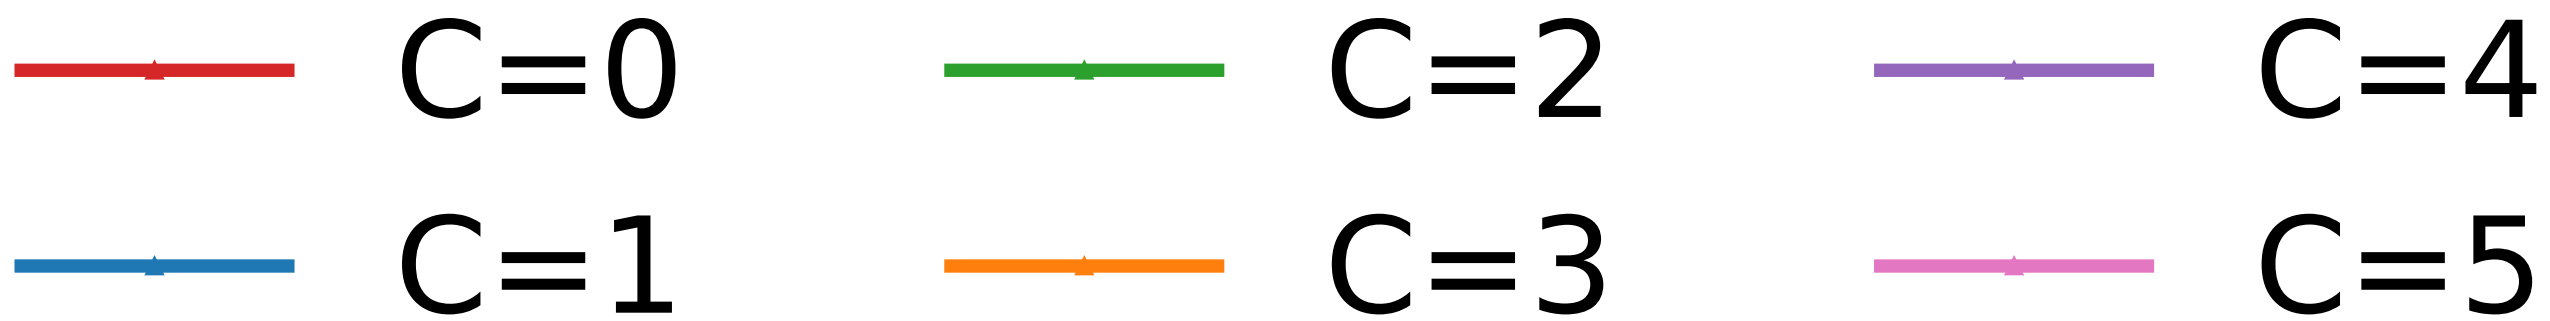

Supplement: supplementary_material [file piecewise_ebf_Llama-3-70B_bf.pdf › supplementary_materials/bf_output_dynamic/cognac/piecewise_ebf_Llama-3-70B_bf.pdf]

# Llama-3-70B



## Prompt Complexity (C)



Supplement: supplementary_material [file piecewise_ebf_Llama-3-70B_bf_fixed_start.pdf › supplementary_materials/bf_output_dynamic/cognac/piecewise_ebf_Llama-3-70B_bf_fixed_start.pdf]

# Llama-3-8B-Instruct

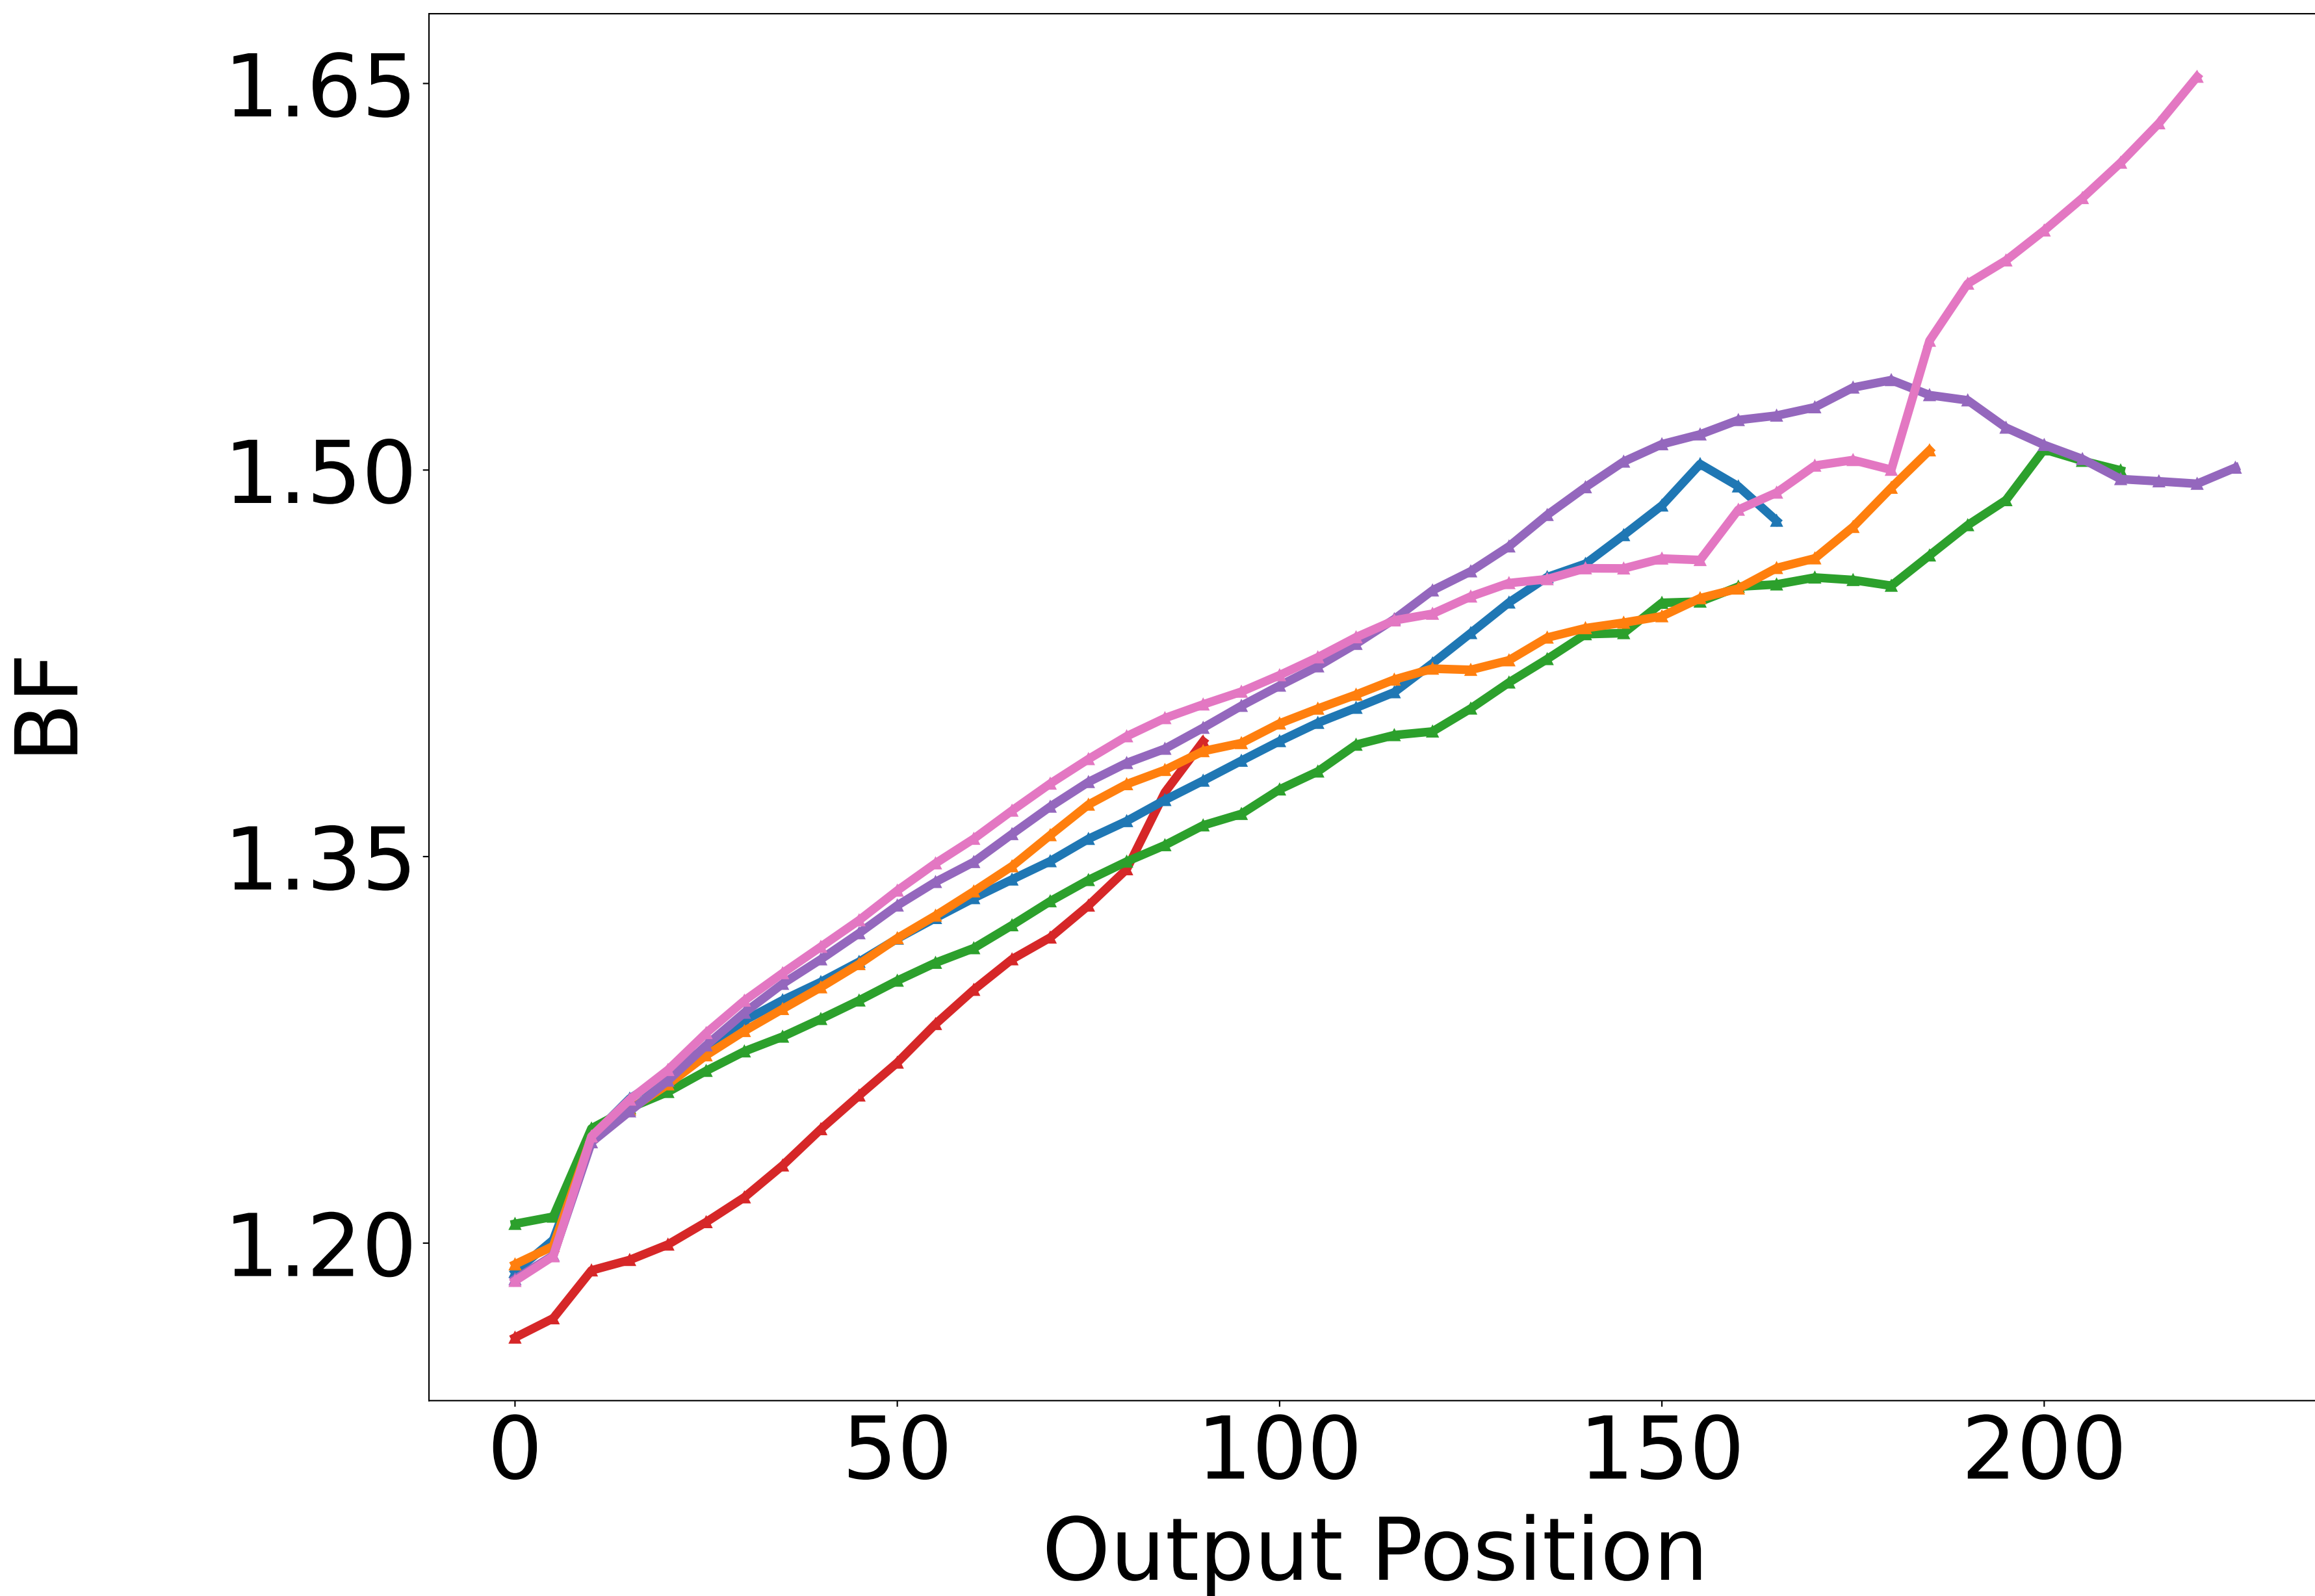

## Prompt Complexity (C)



Supplement: supplementary_material [file piecewise_ebf_Llama-3-8B-Instruct_bf.pdf › supplementary_materials/bf_output_dynamic/cognac/piecewise_ebf_Llama-3-8B-Instruct_bf.pdf]

# Llama-3-8B-Instruct

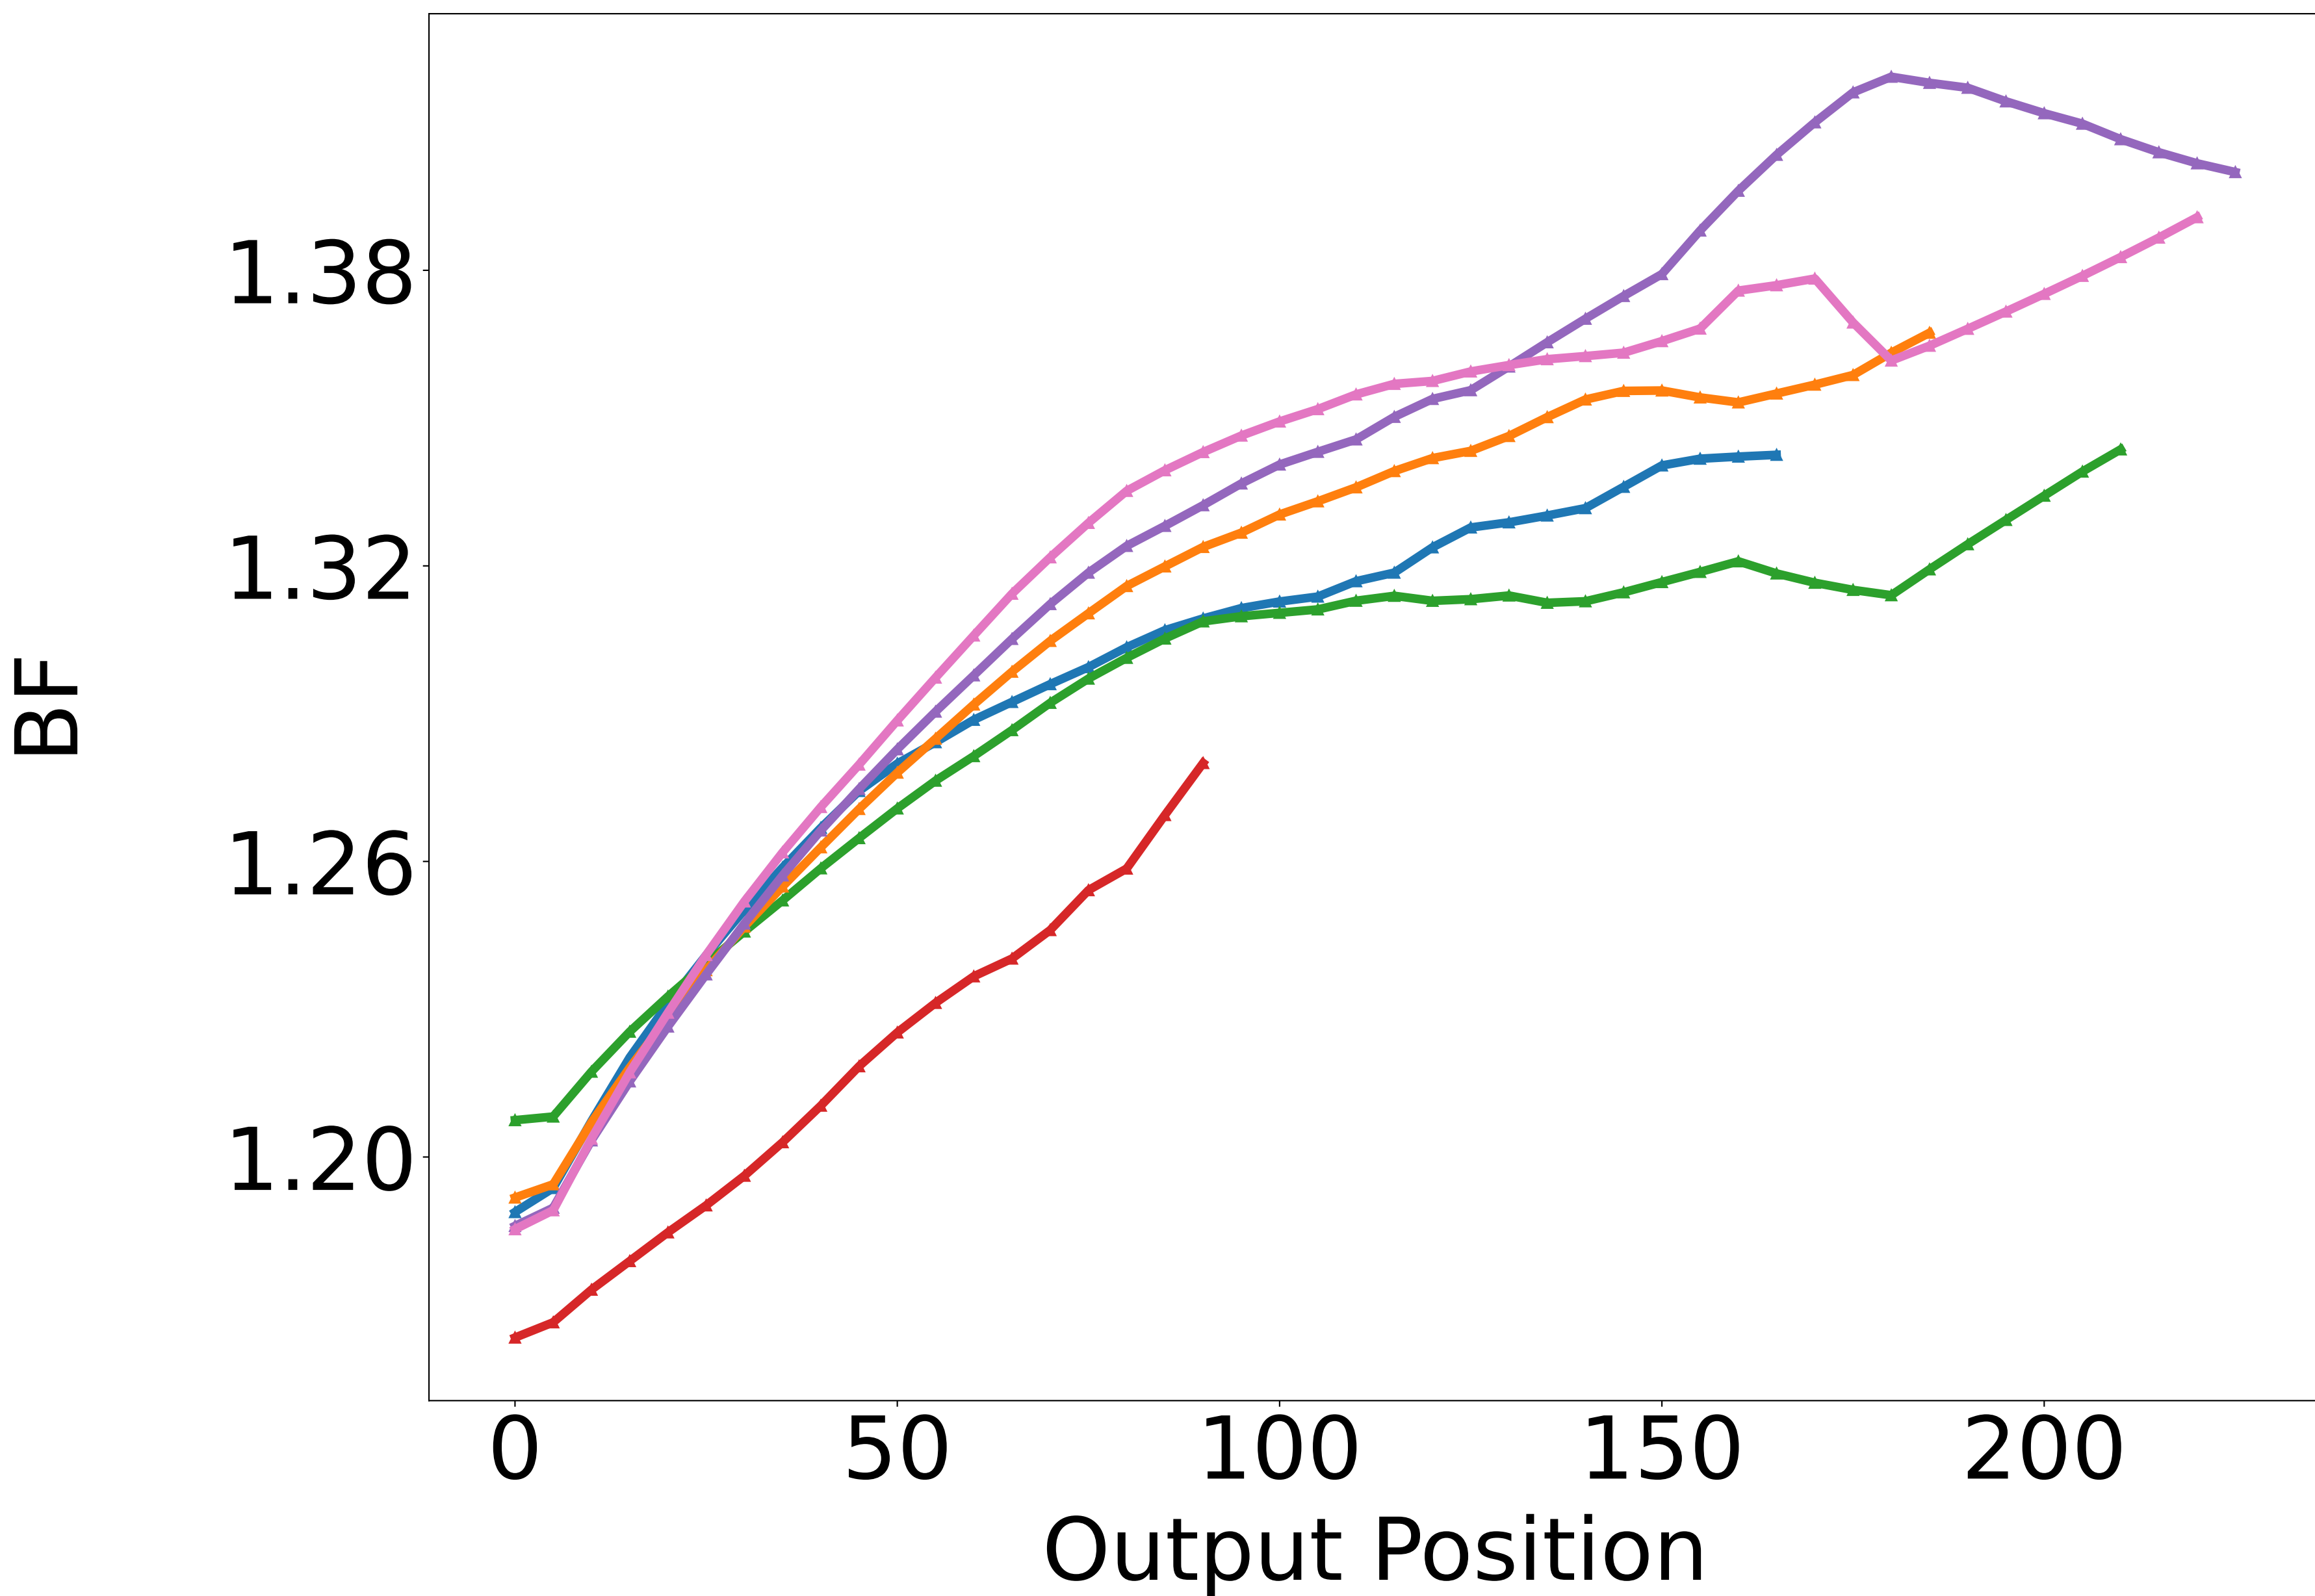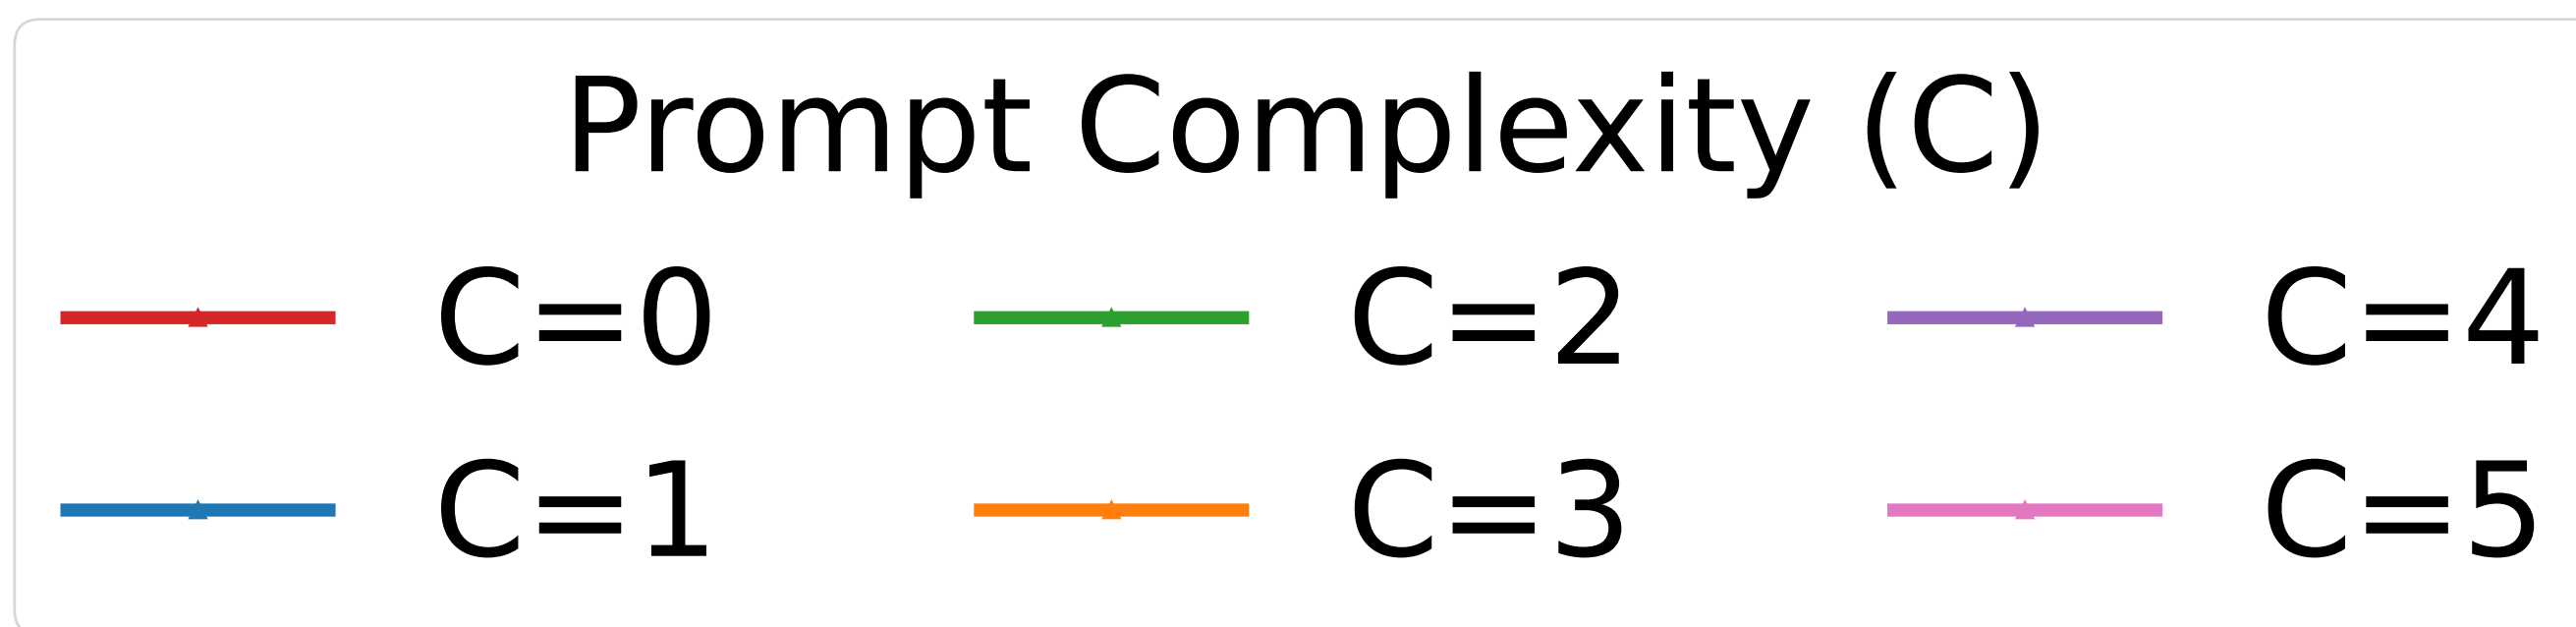

Supplement: supplementary_material [file piecewise_ebf_Llama-3-8B-Instruct_bf_fixed_start.pdf › supplementary_materials/bf_output_dynamic/cognac/piecewise_ebf_Llama-3-8B-Instruct_bf_fixed_start.pdf]

# Llama-3-8B



## Prompt Complexity (C)



Supplement: supplementary_material [file piecewise_ebf_Llama-3-8B_bf.pdf › supplementary_materials/bf_output_dynamic/cognac/piecewise_ebf_Llama-3-8B_bf.pdf]

# Llama-3-8B



Prompt Complexity (C)



Supplement: supplementary_material [file piecewise_ebf_Llama-3-8B_bf_fixed_start.pdf › supplementary_materials/bf_output_dynamic/cognac/piecewise_ebf_Llama-3-8B_bf_fixed_start.pdf]

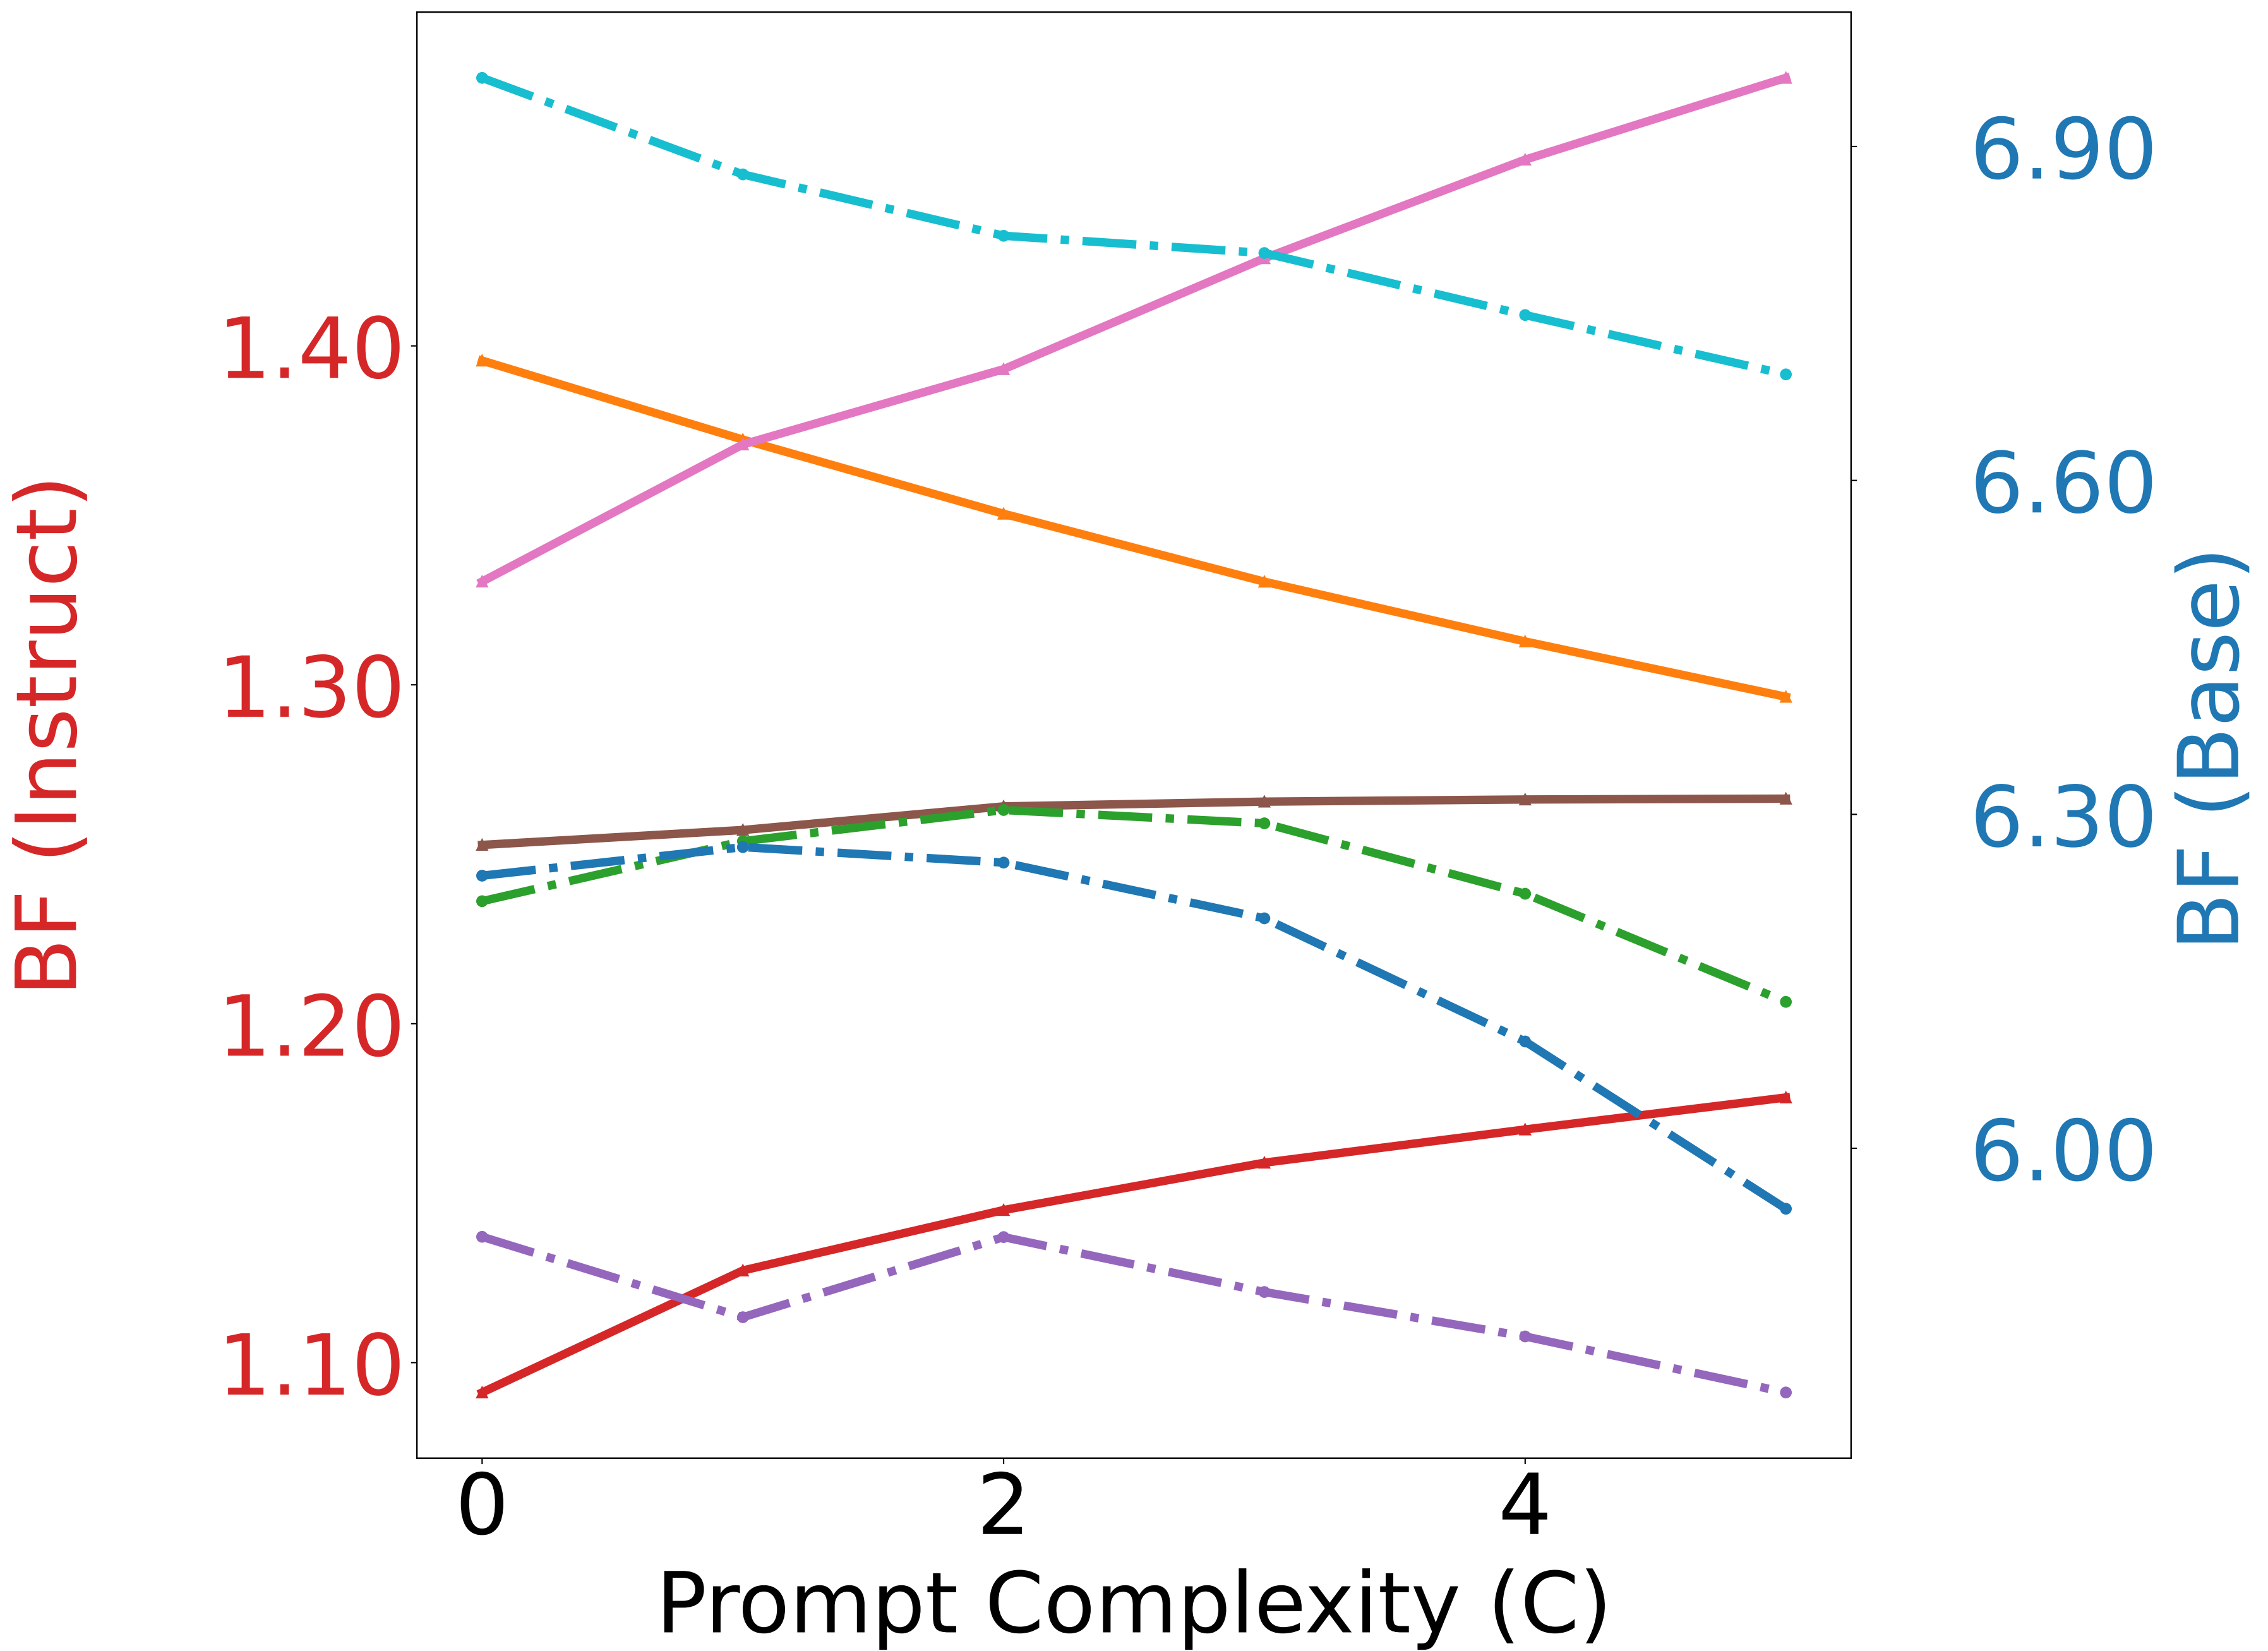

- |  |                      |  |             |
|--|----------------------|--|-------------|
|  | Llama-2-13B-chat     |  | Llama-2-13B |
|  | Llama-2-70B-chat     |  | Llama-2-70B |
|  | Llama-3-70B-Instruct |  | Llama-3-70B |
|  | Llama-3-8B-Instruct  |  | Llama-3-8B  |

Supplement: supplementary_material [file model_wise_comparison_ebf_bf.pdf › supplementary_materials/bf_output_dynamic/creative_story_gen/model_wise_comparison_ebf_bf.pdf]

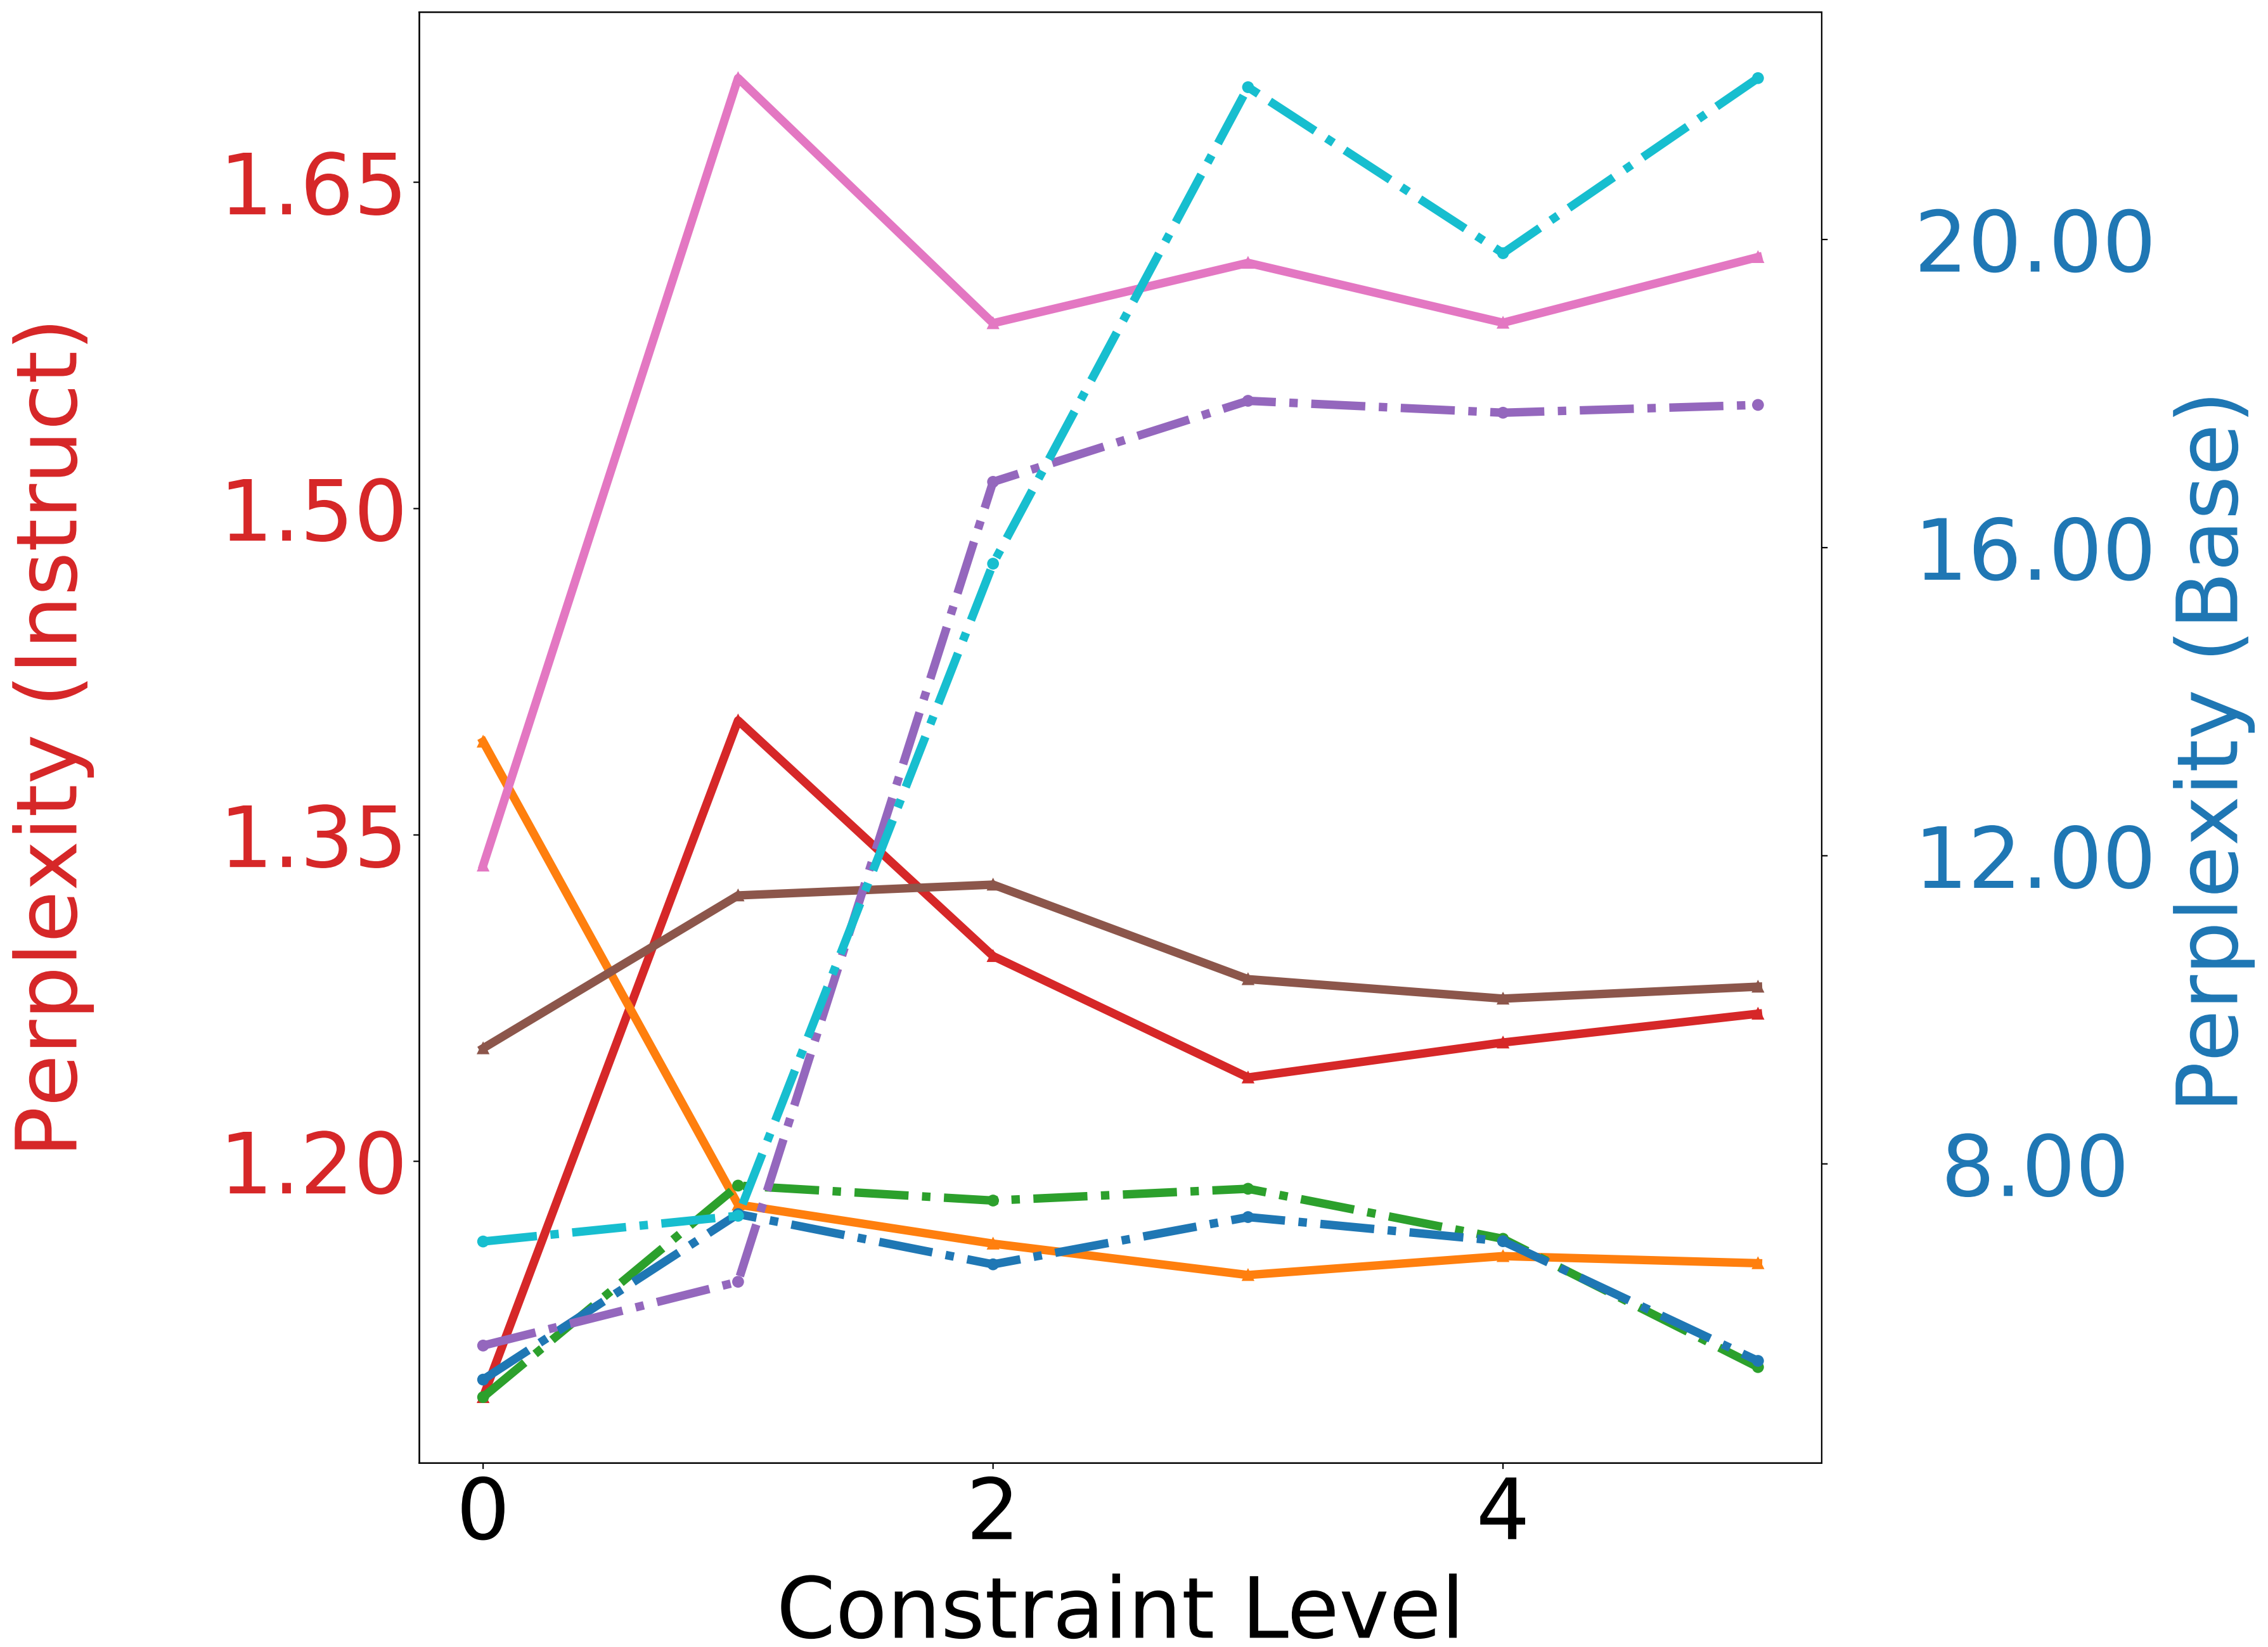

- Llama-2-13B-chat
- Llama-2-70B-chat
- Llama-3-70B-Instruct
- Llama-3-8B-Instruct
- Llama-2-13B
- Llama-2-70B
- Llama-3-70B
- Llama-3-8B

Supplement: supplementary_material [file model_wise_comparison_plot_ebf_bf.pdf › supplementary_materials/bf_output_dynamic/creative_story_gen/model_wise_comparison_plot_ebf_bf.pdf]

# Llama-2-13B-chat

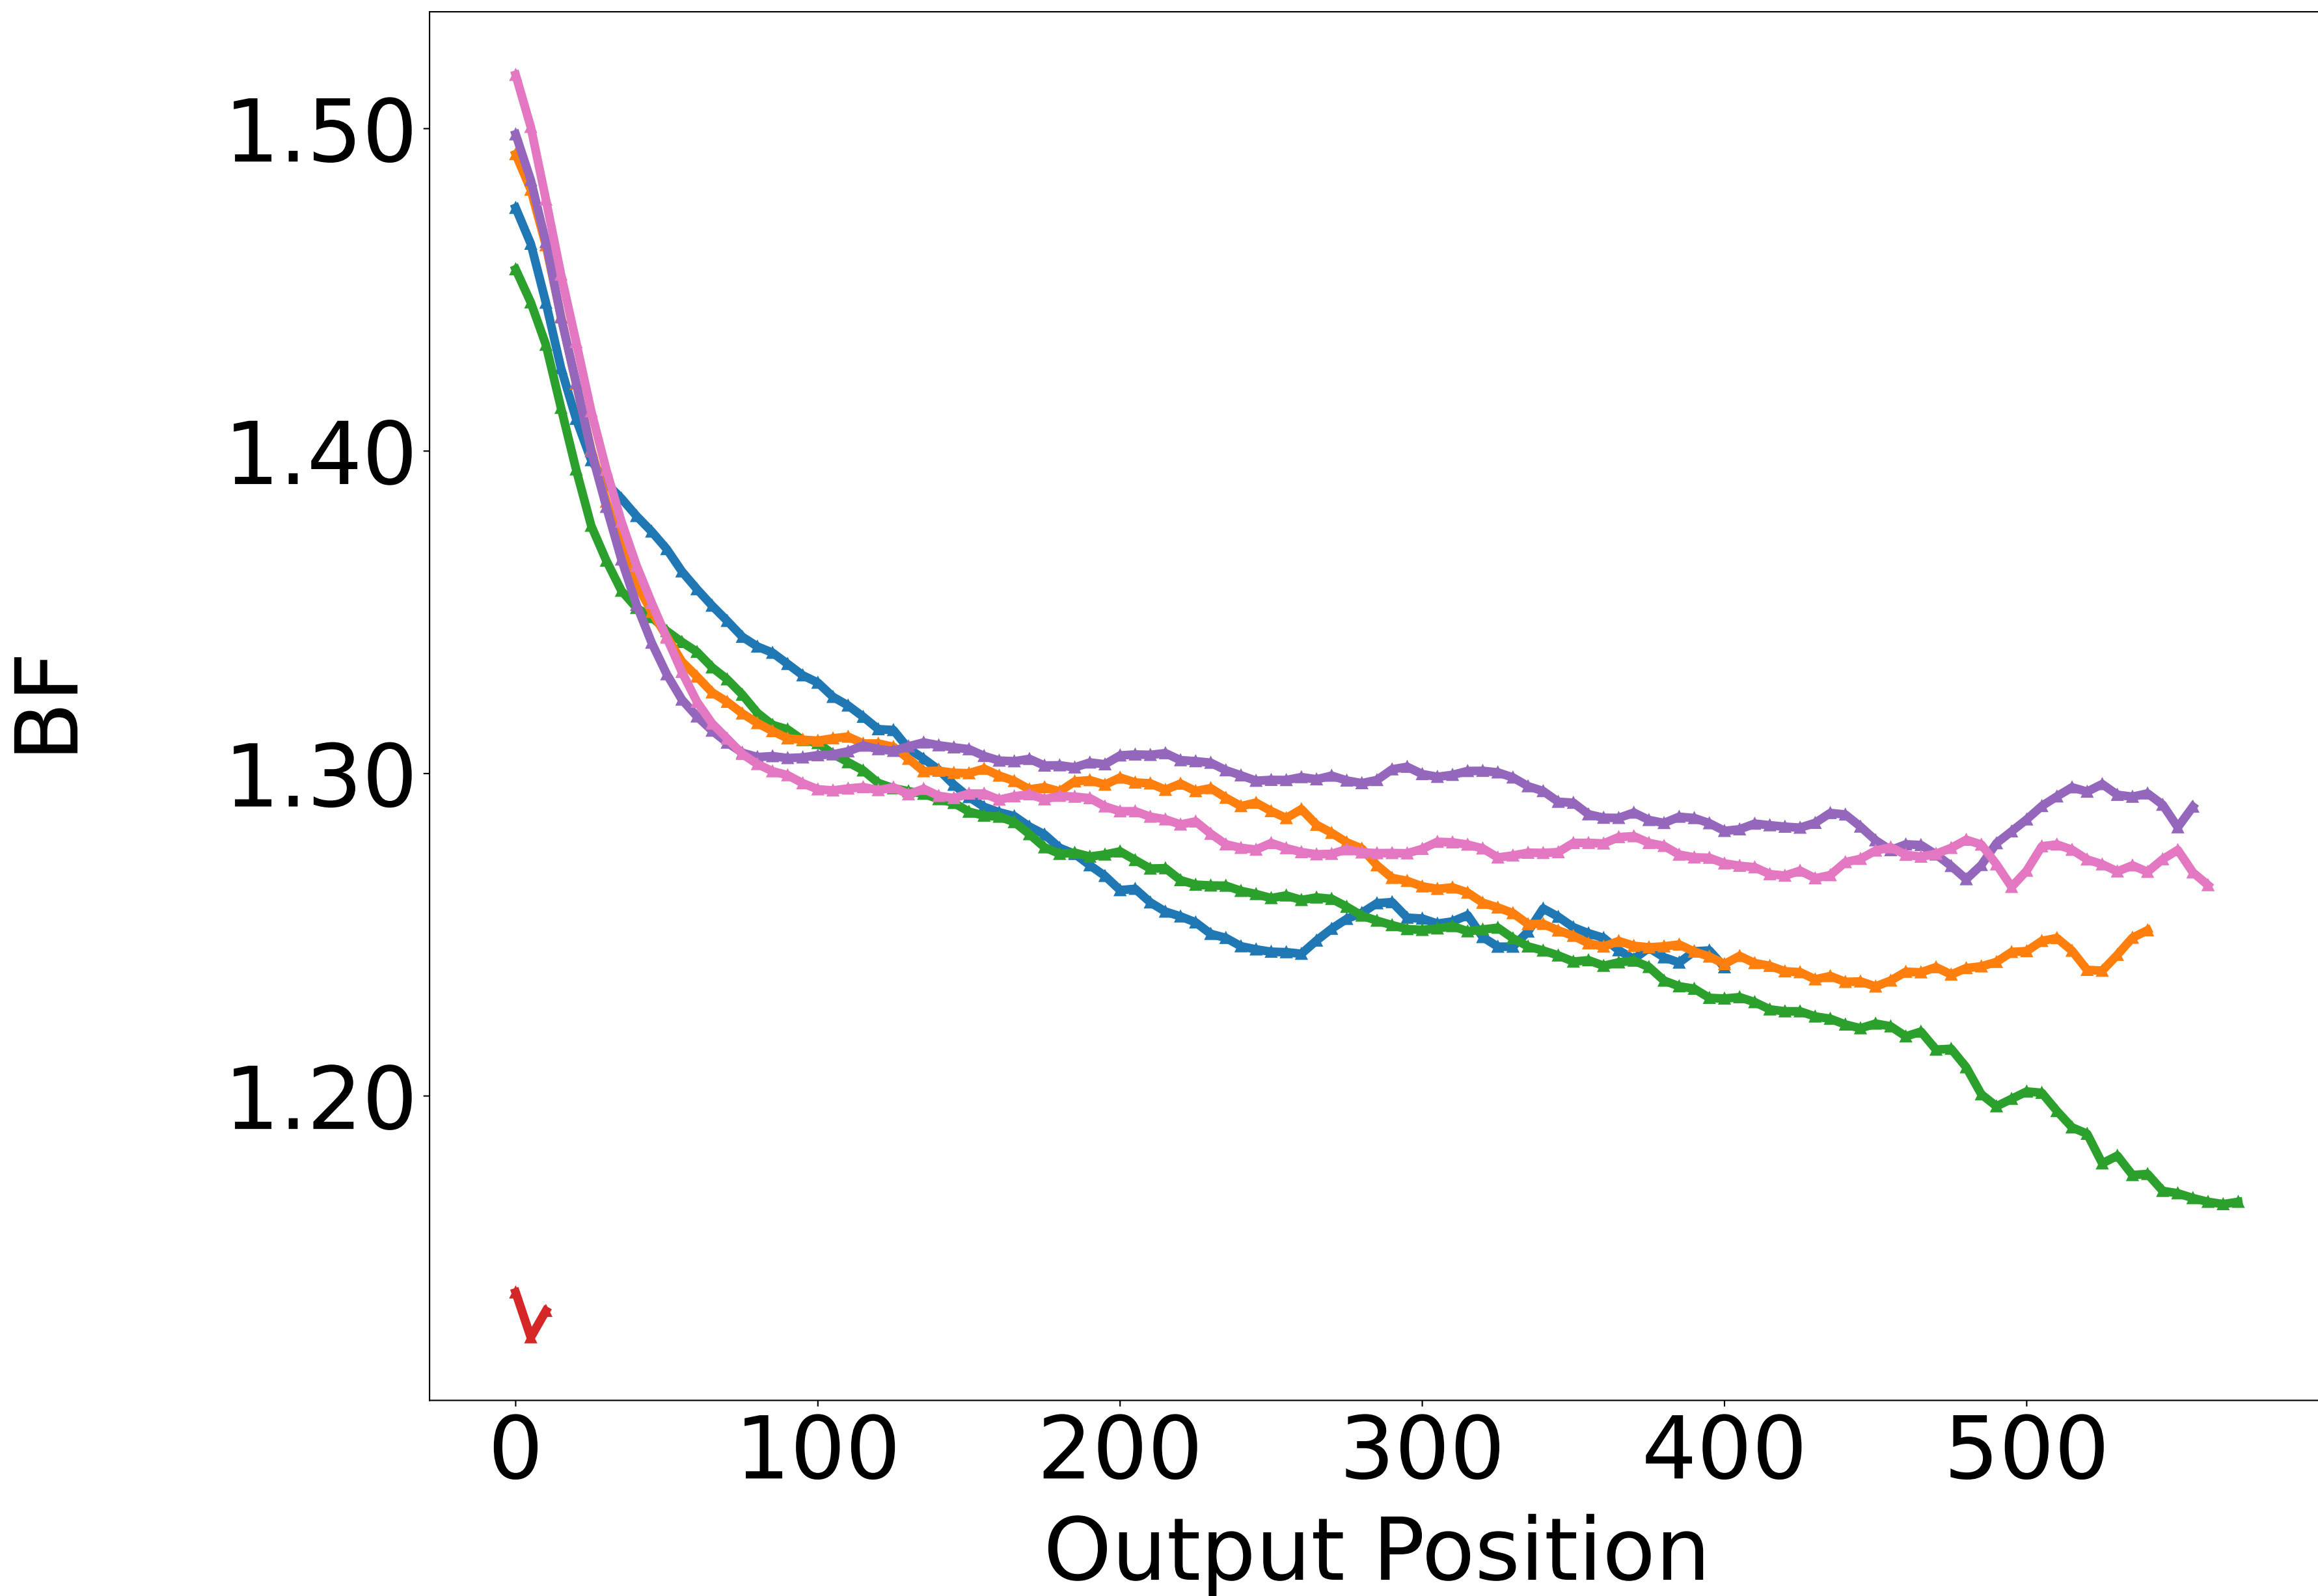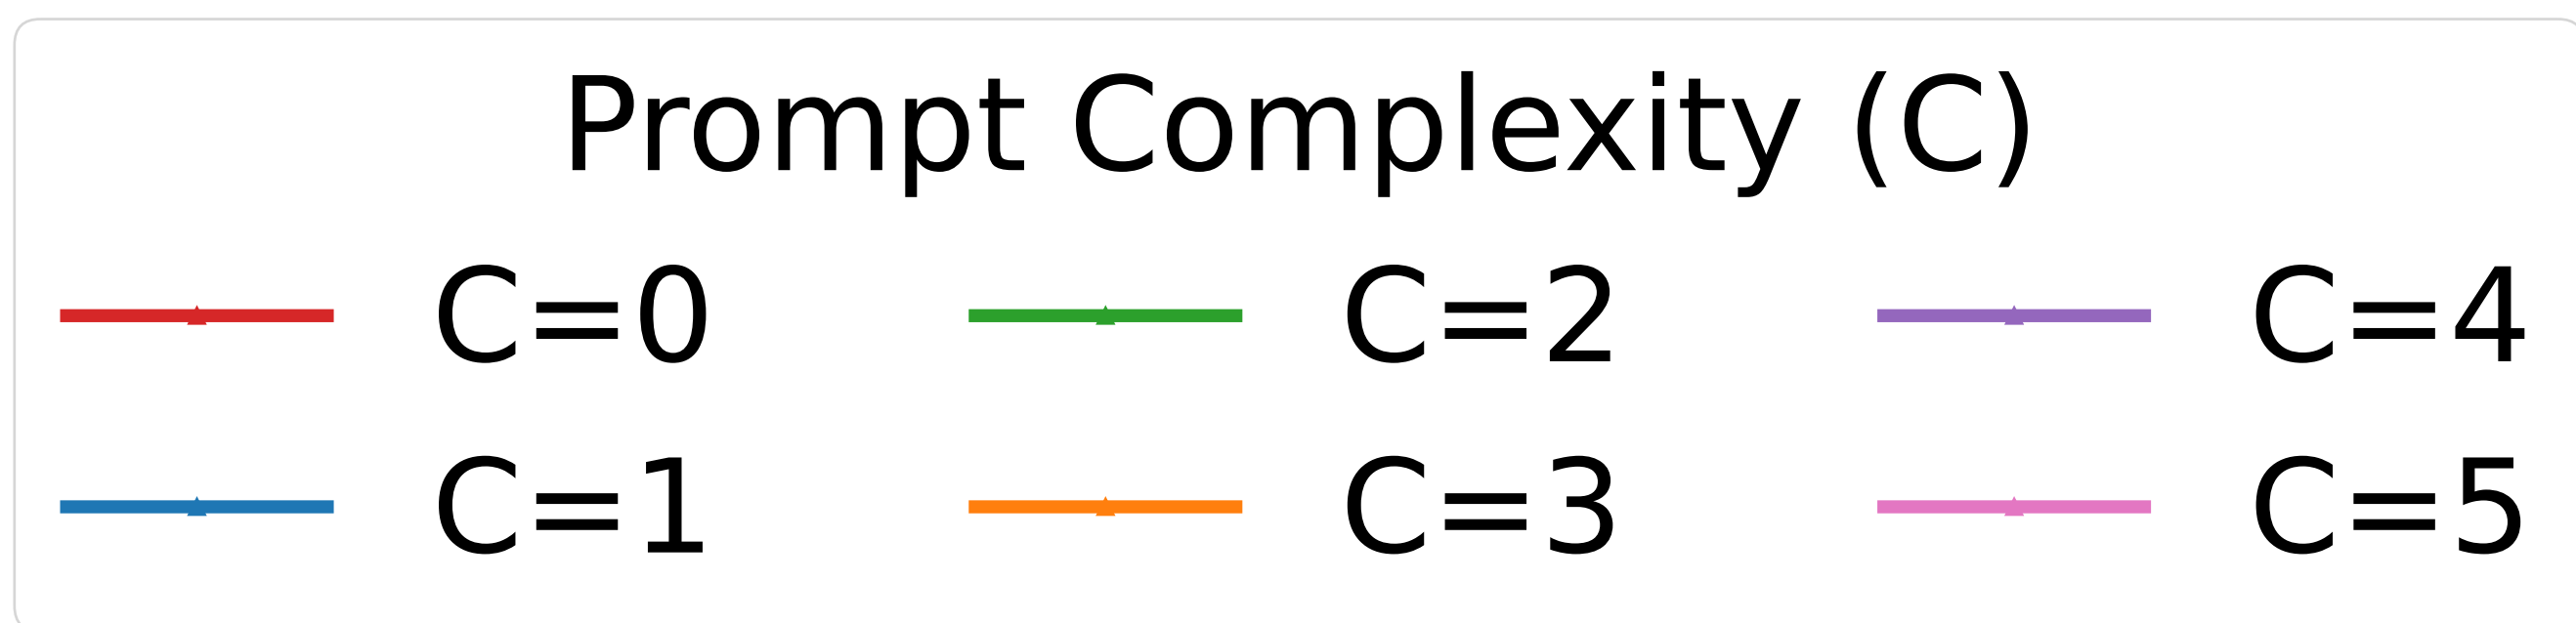

Supplement: supplementary_material [file piecewise_ebf_Llama-2-13B-chat_bf.pdf › supplementary_materials/bf_output_dynamic/creative_story_gen/piecewise_ebf_Llama-2-13B-chat_bf.pdf]

# Llama-2-13B-chat

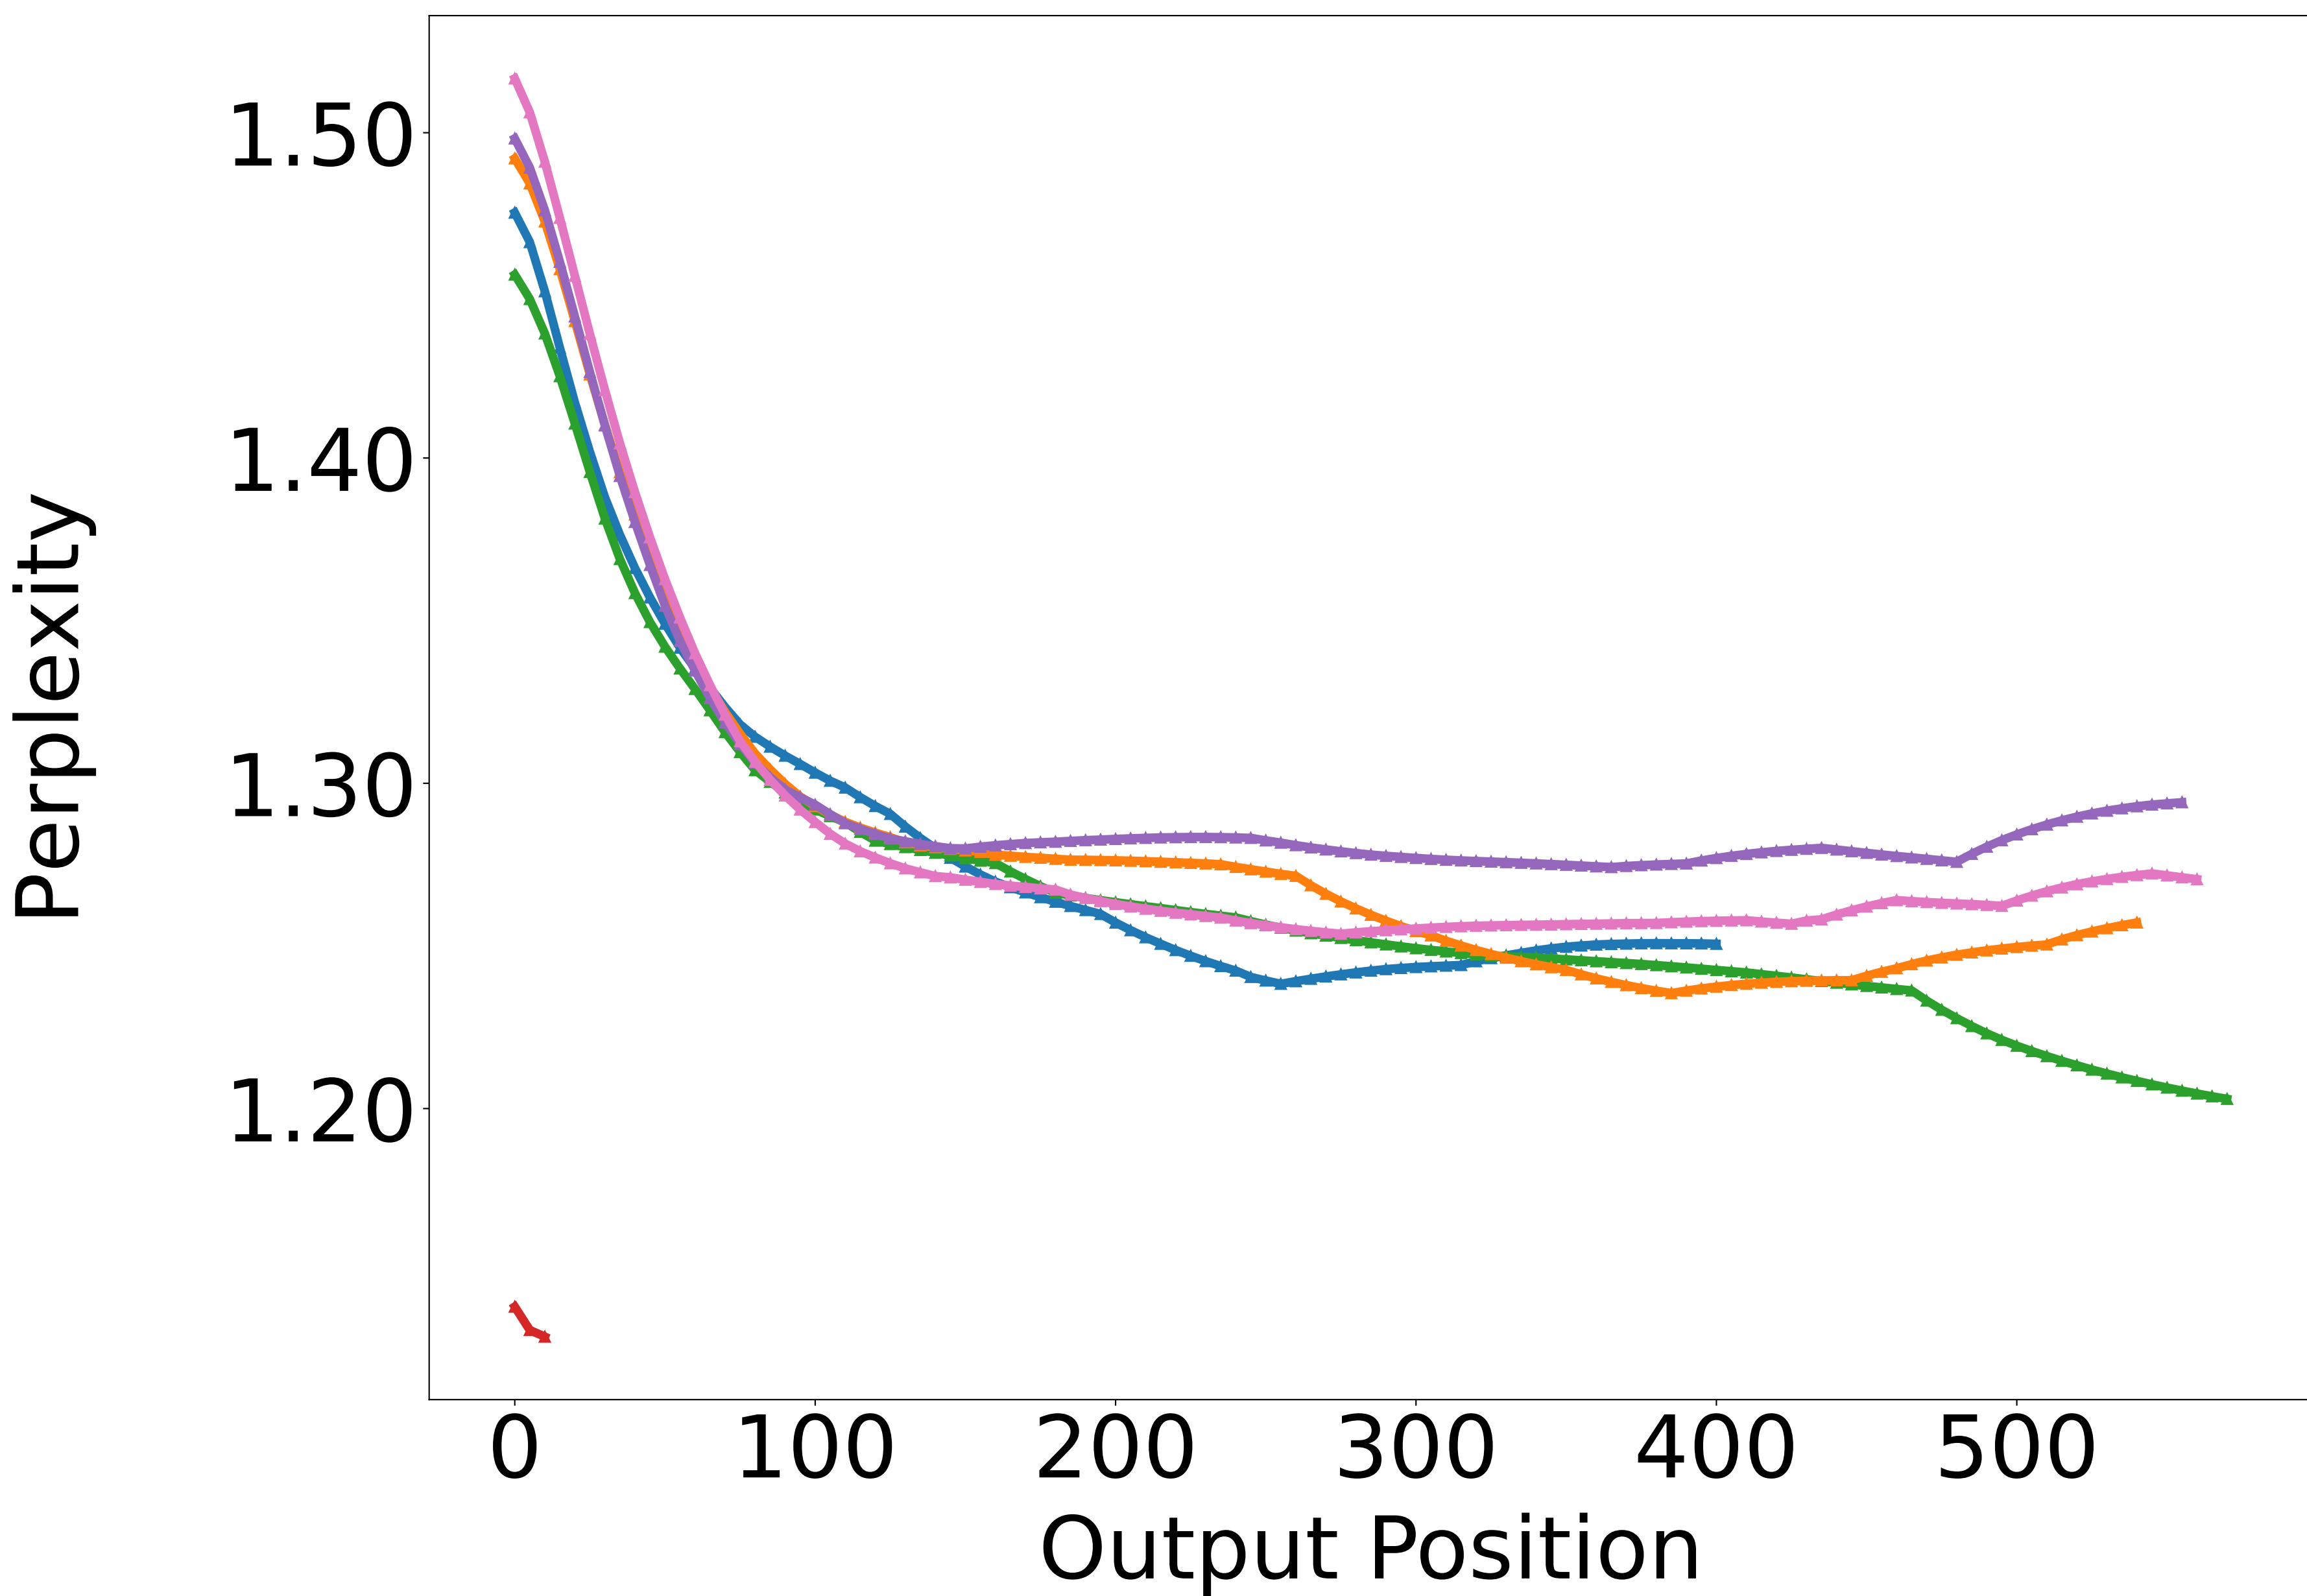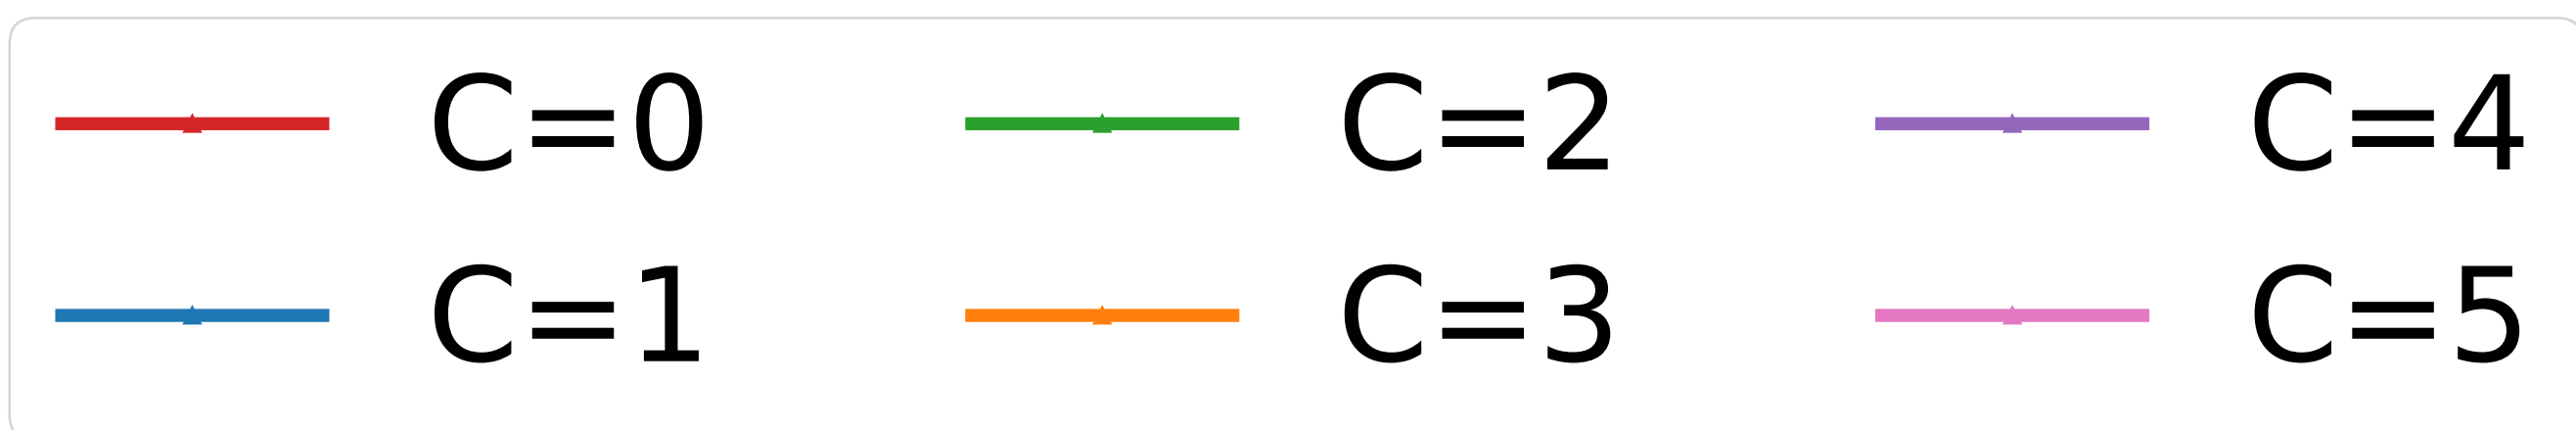

Supplement: supplementary_material [file piecewise_ebf_Llama-2-13B-chat_bf_fixed_start.pdf › supplementary_materials/bf_output_dynamic/creative_story_gen/piecewise_ebf_Llama-2-13B-chat_bf_fixed_start.pdf]

# Llama-2-13B

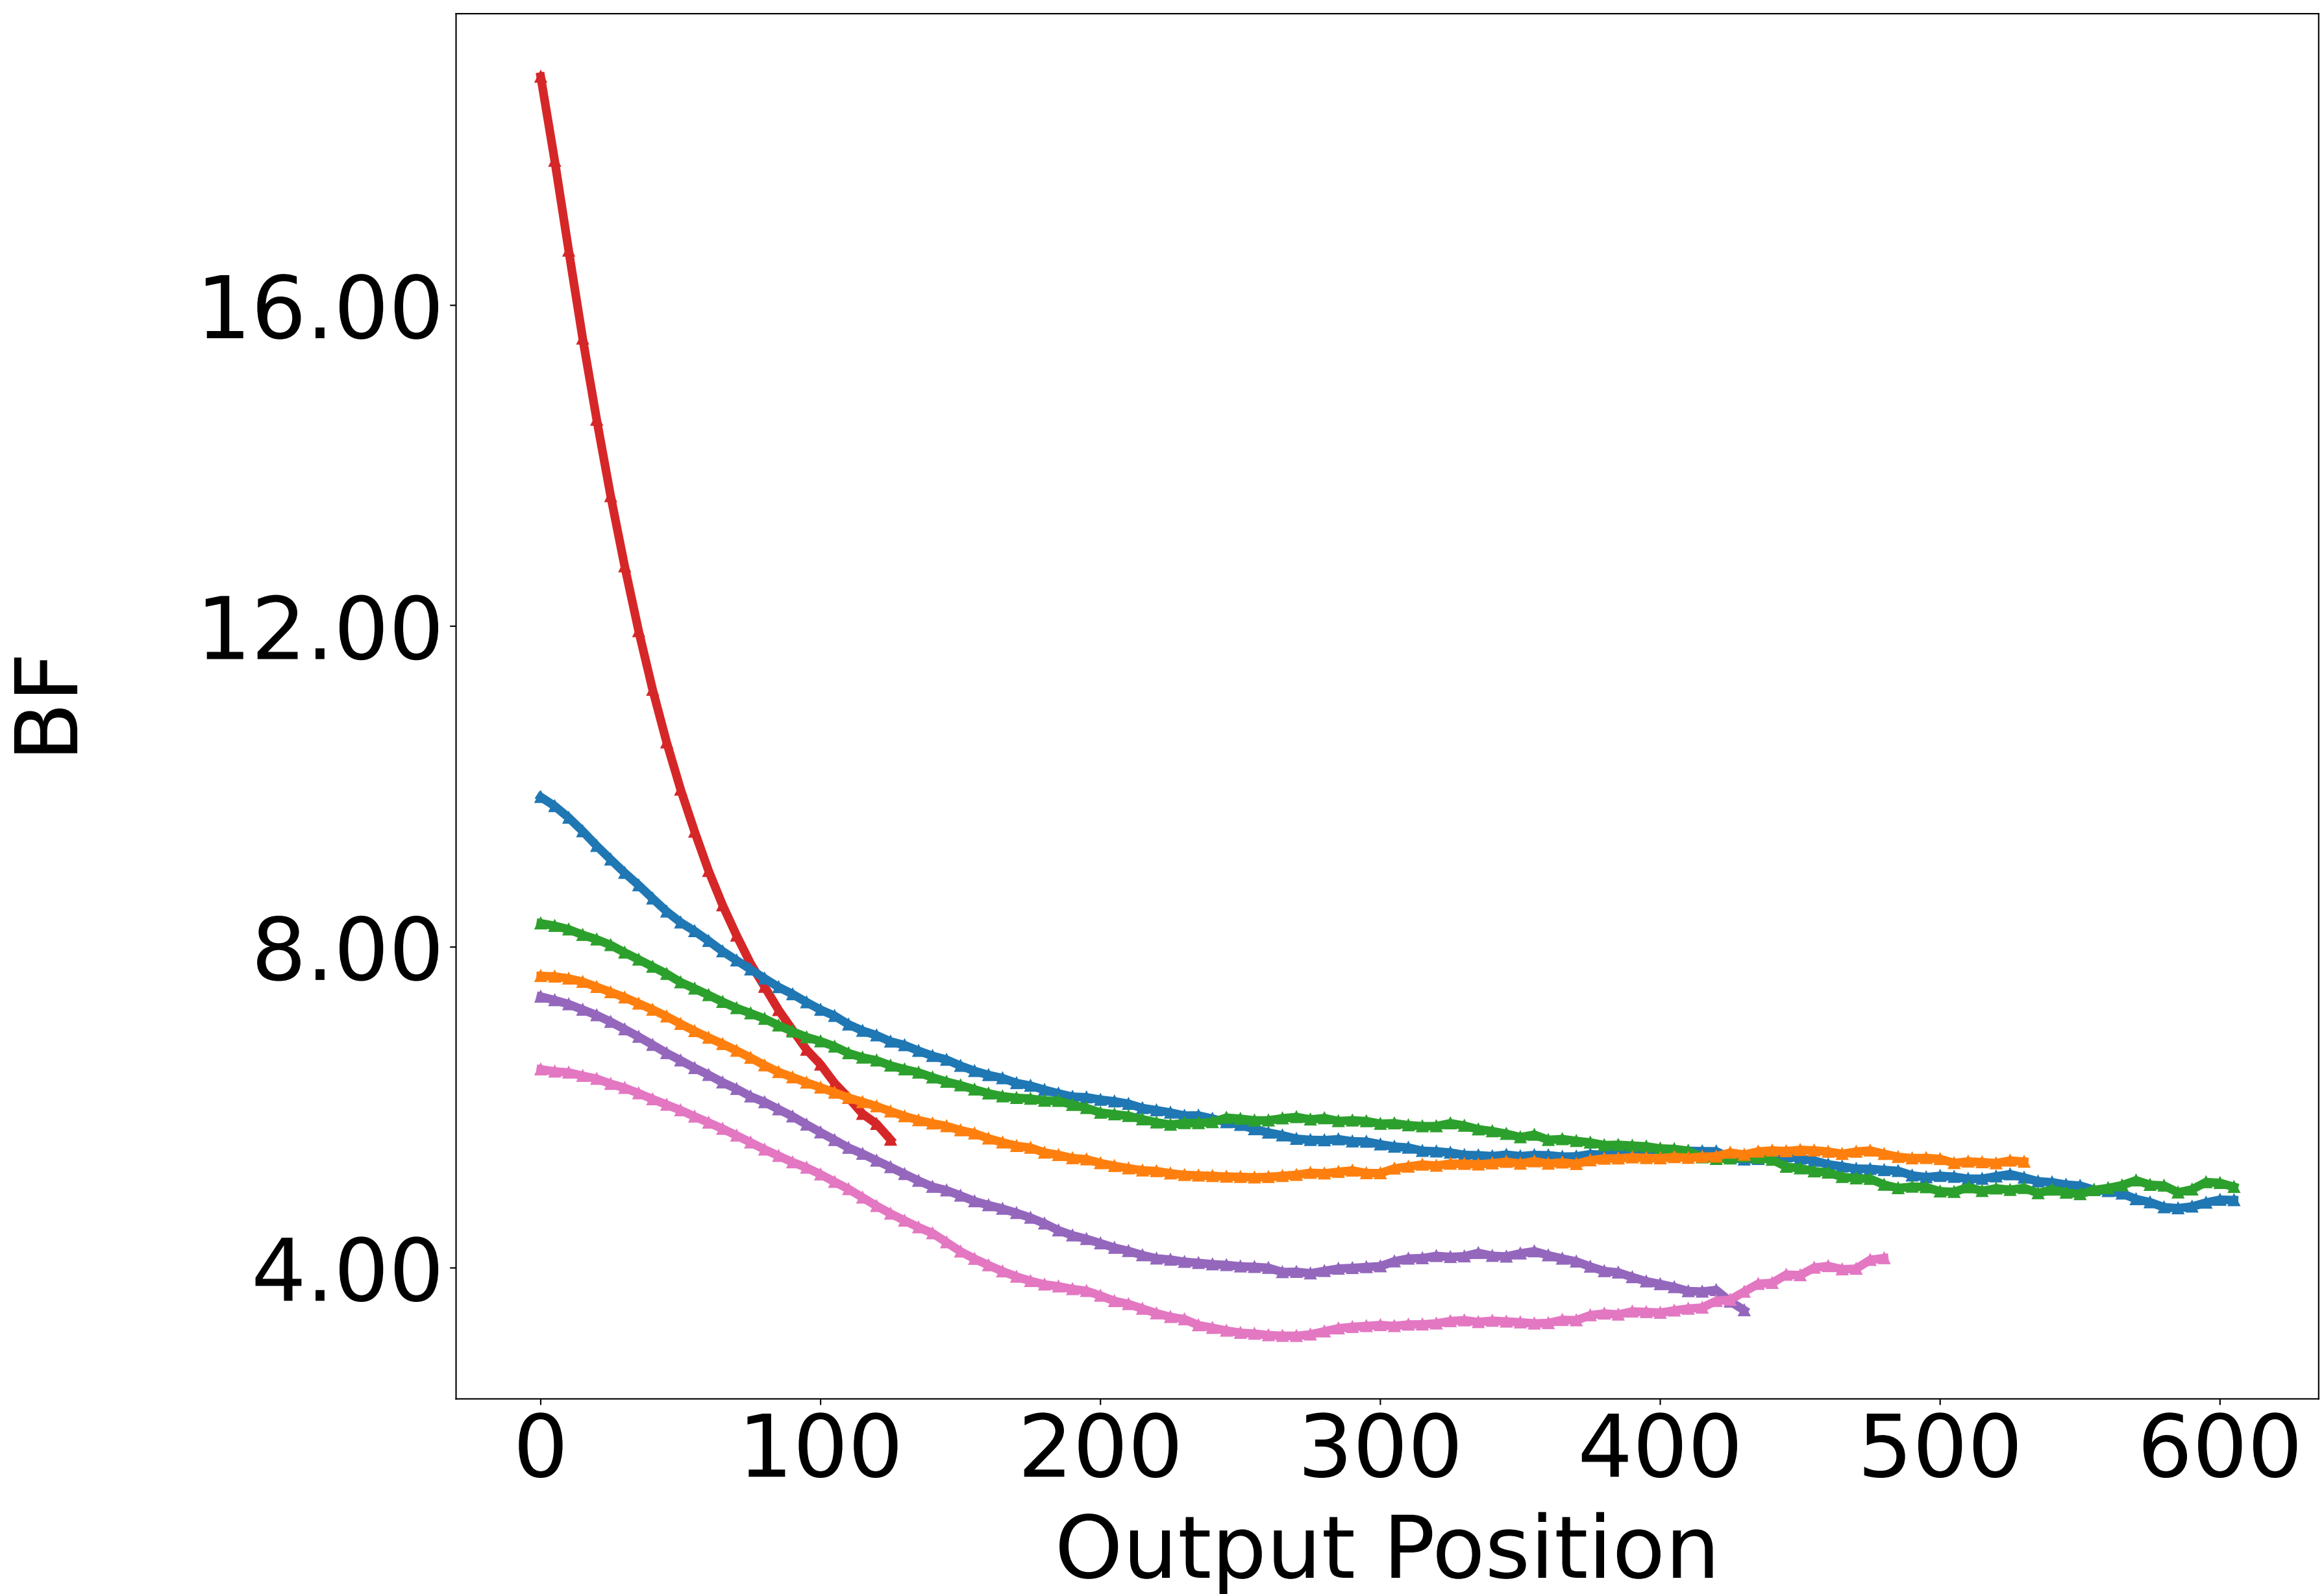

## Prompt Complexity (C)

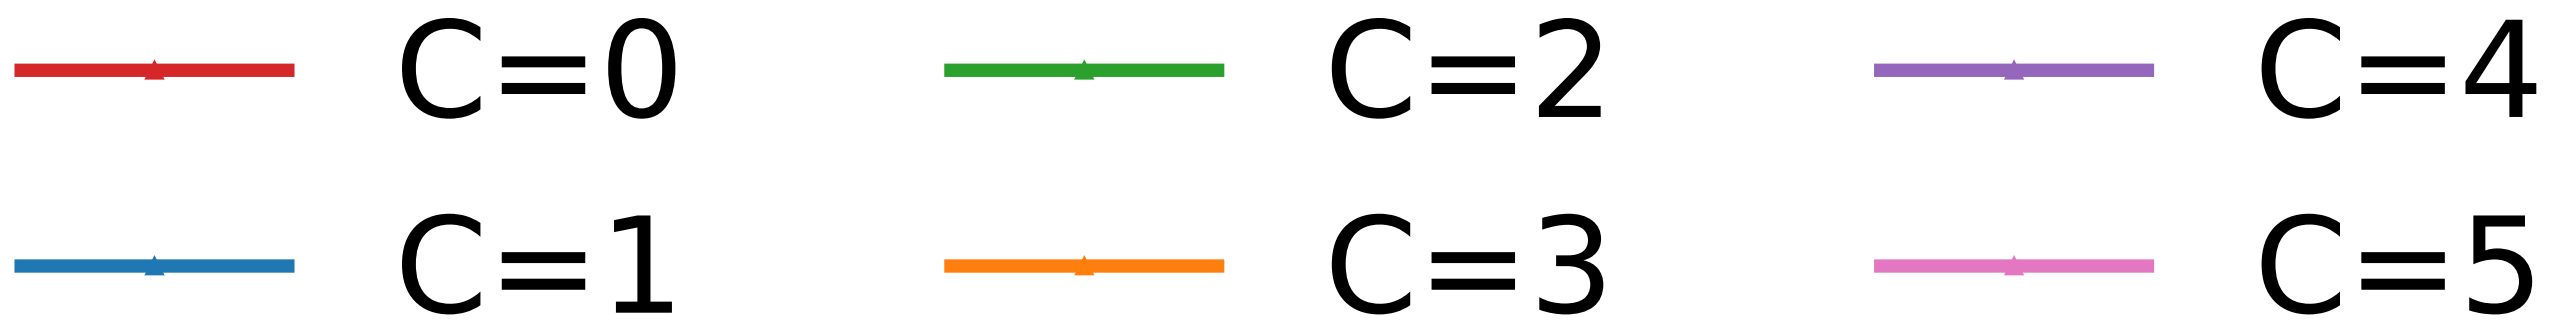

Supplement: supplementary_material [file piecewise_ebf_Llama-2-13B_bf.pdf › supplementary_materials/bf_output_dynamic/creative_story_gen/piecewise_ebf_Llama-2-13B_bf.pdf]

# Llama-2-70B-chat

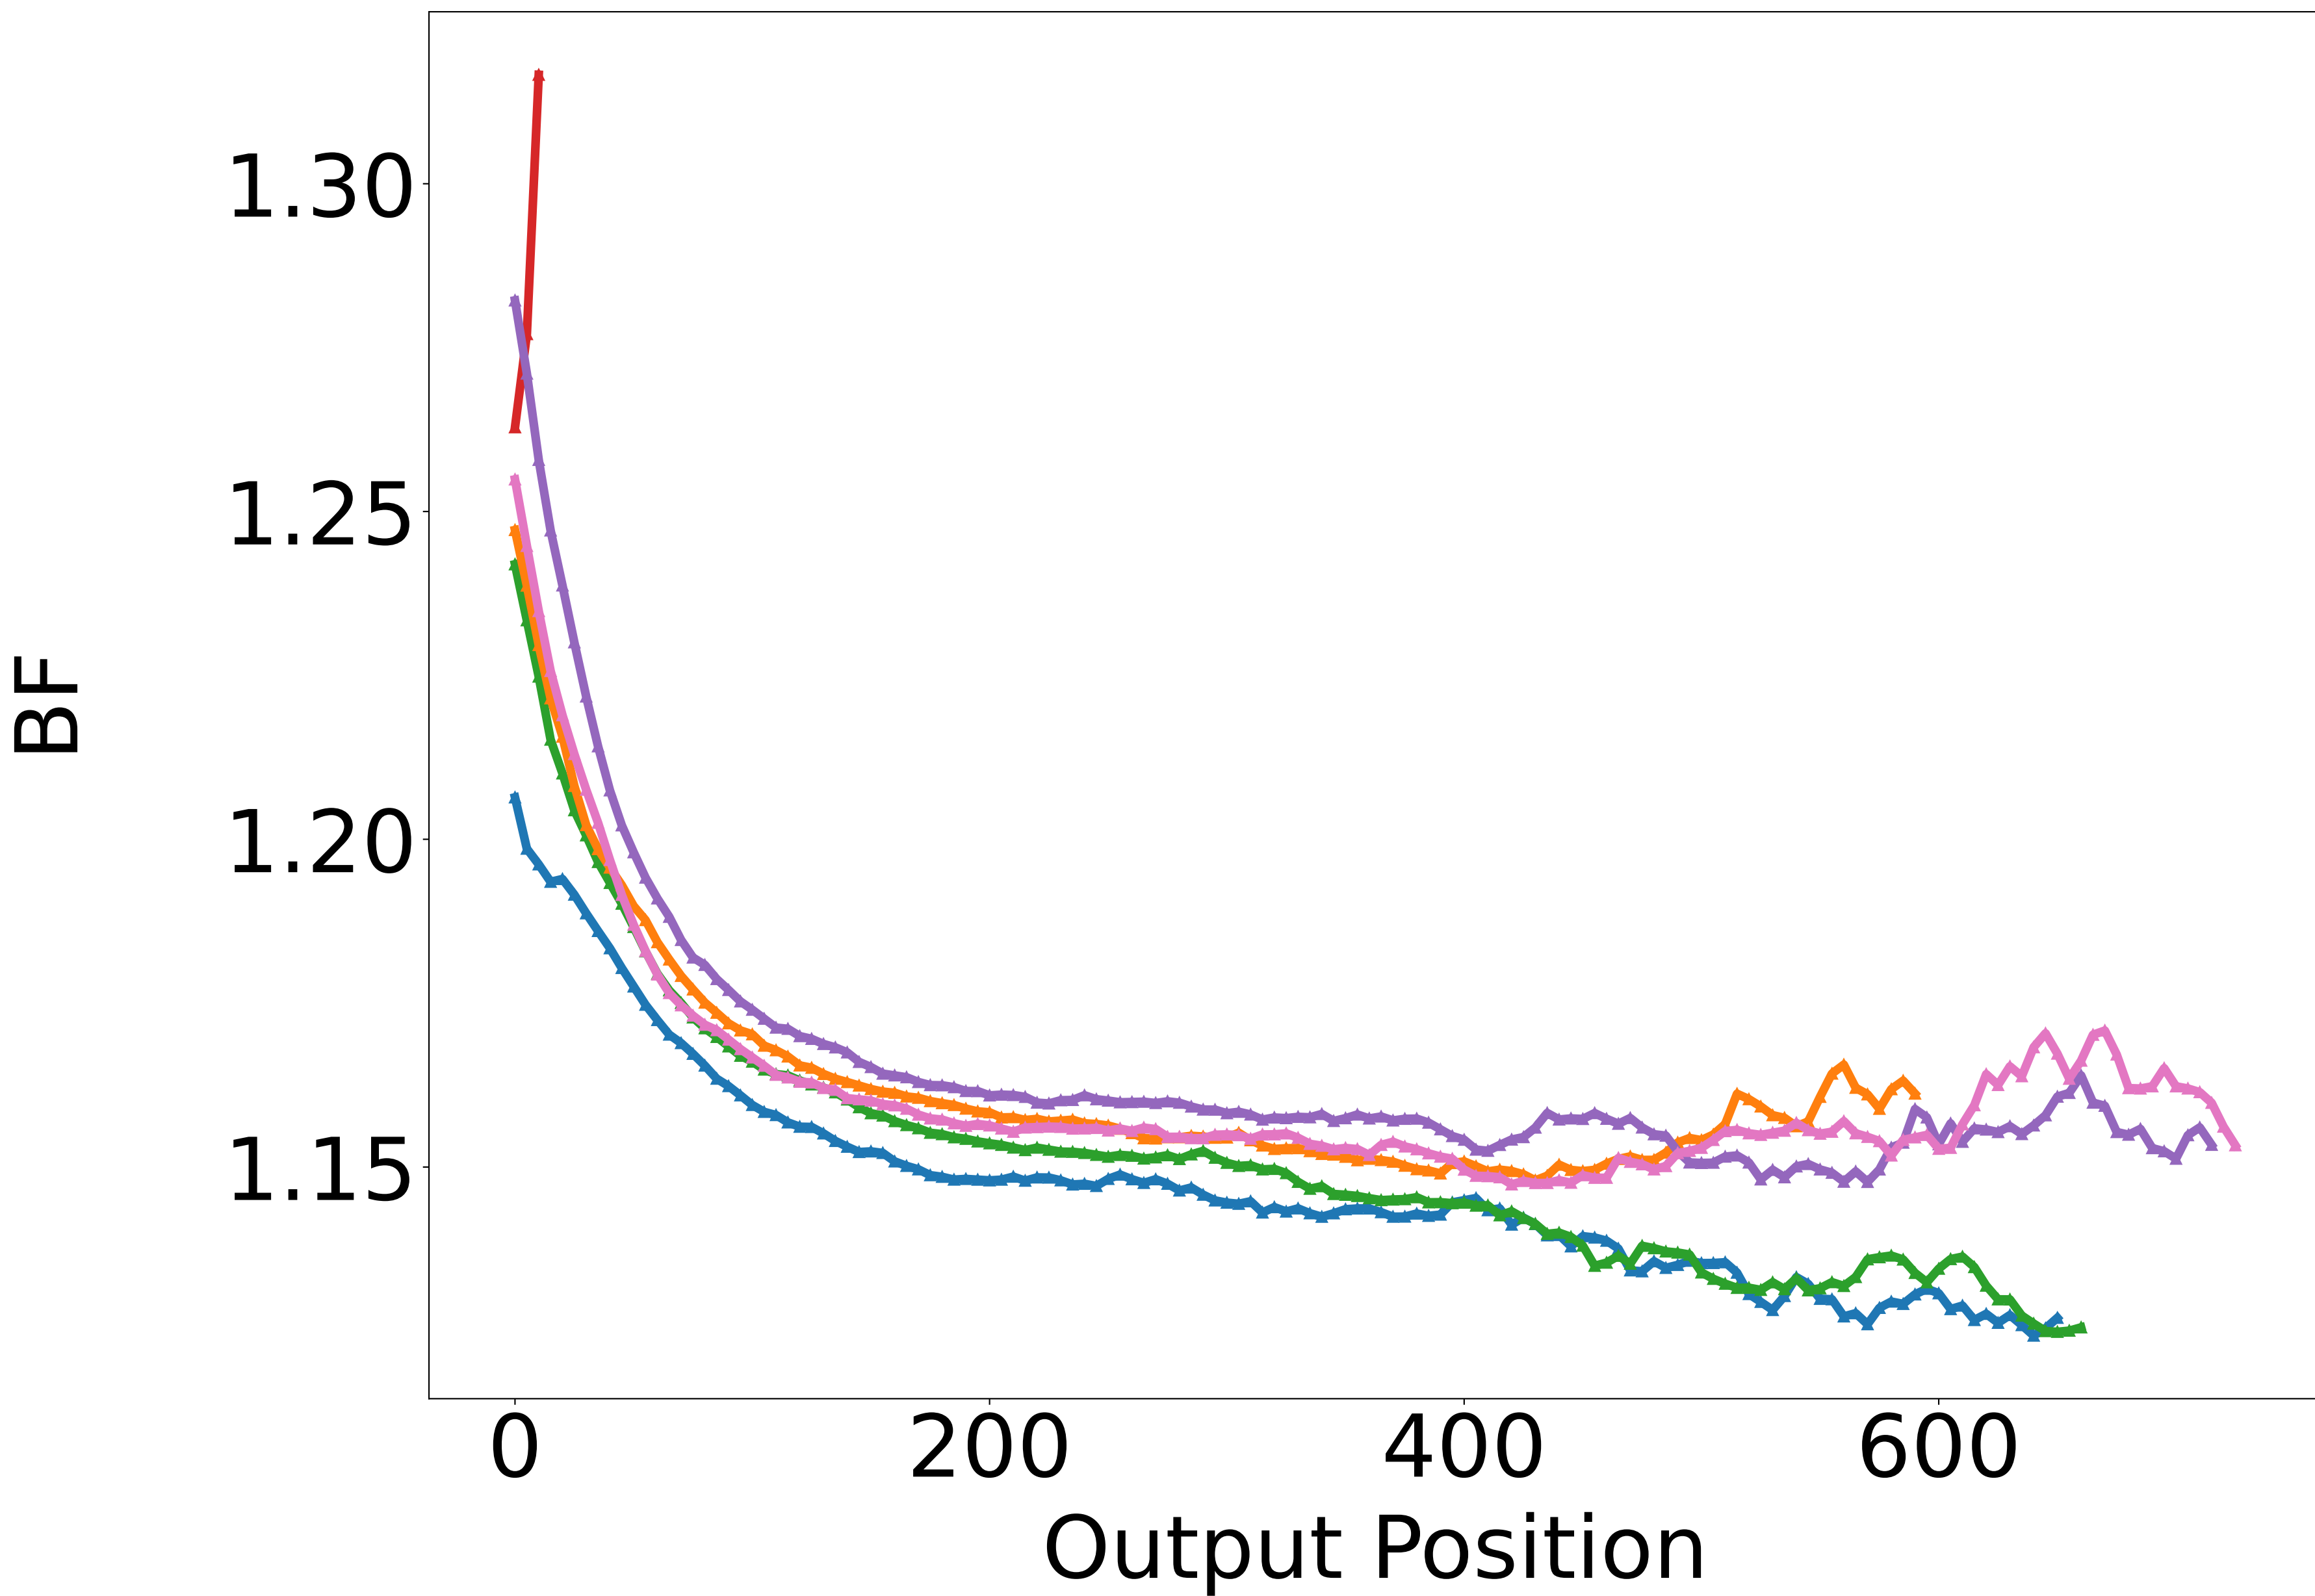

## Prompt Complexity (C)



Supplement: supplementary_material [file piecewise_ebf_Llama-2-70B-chat_bf.pdf › supplementary_materials/bf_output_dynamic/creative_story_gen/piecewise_ebf_Llama-2-70B-chat_bf.pdf]

# Llama-2-70B

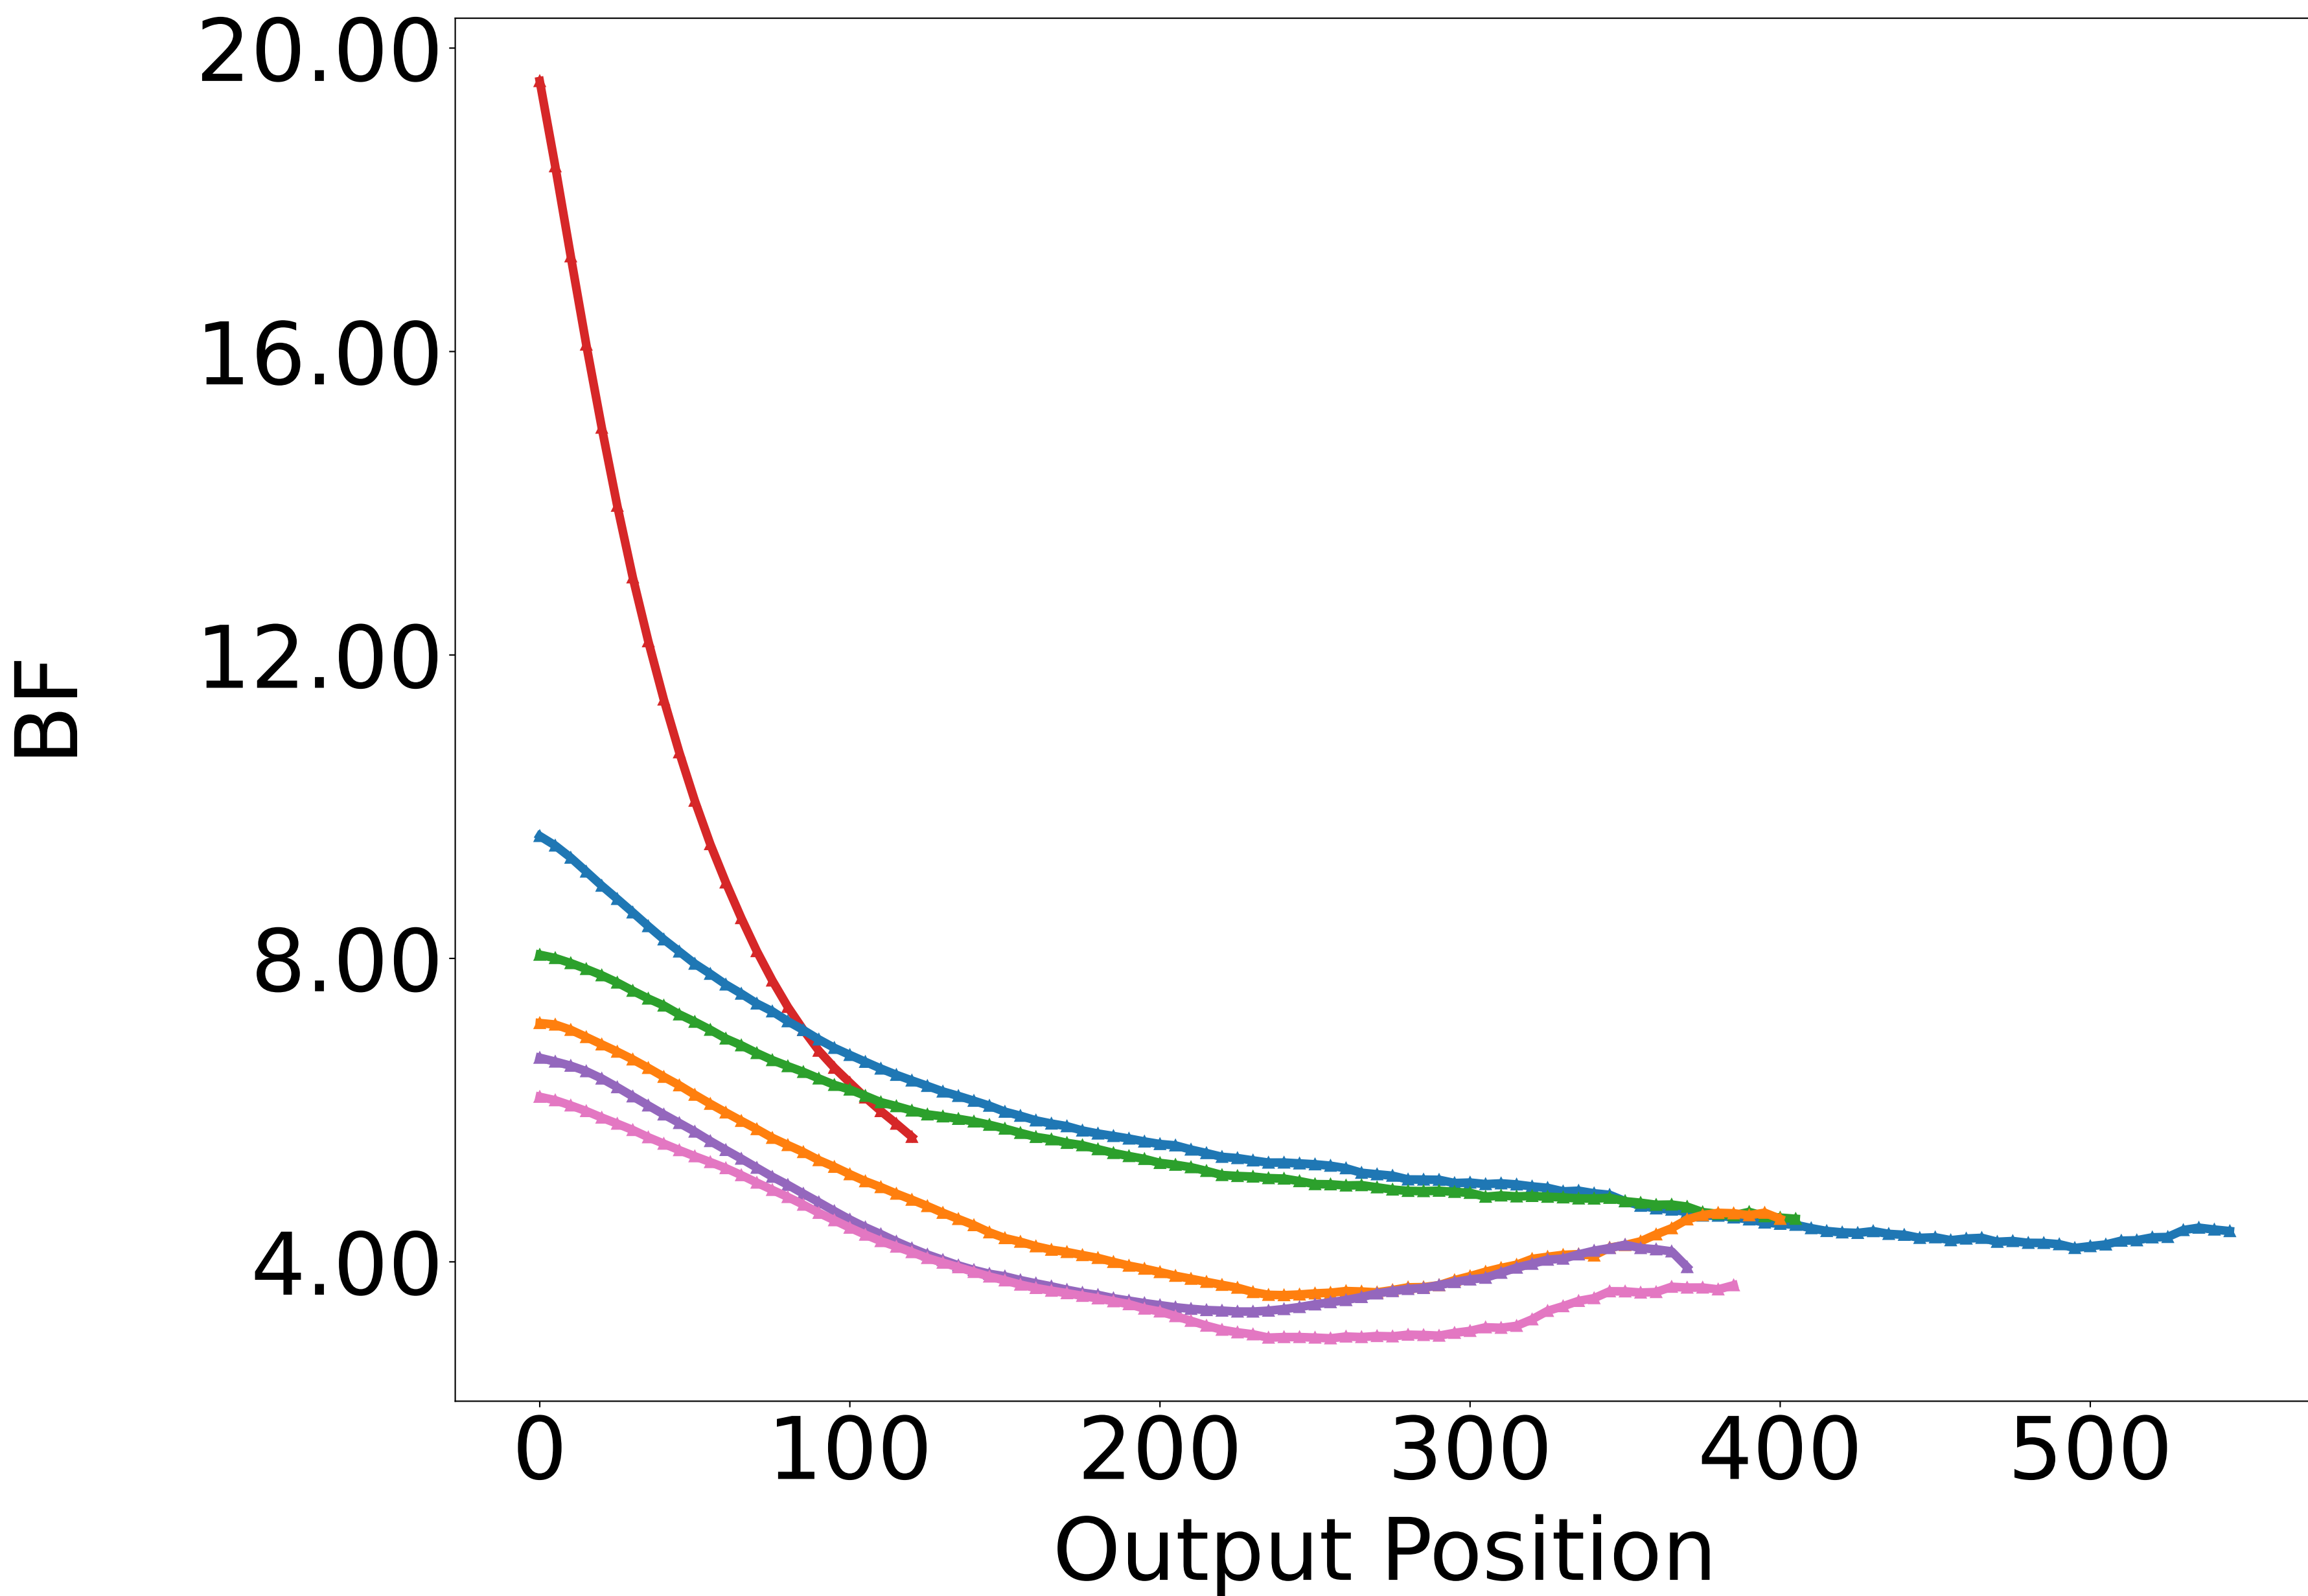

## Prompt Complexity (C)

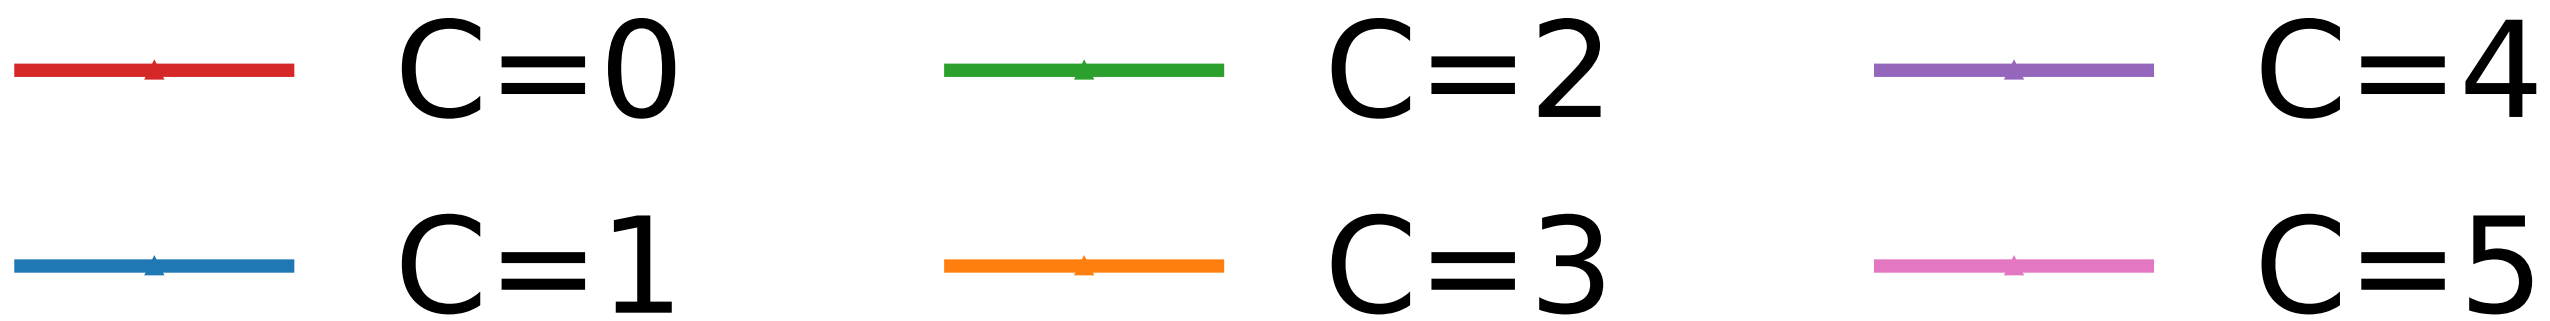

Supplement: supplementary_material [file piecewise_ebf_Llama-2-70B_bf.pdf › supplementary_materials/bf_output_dynamic/creative_story_gen/piecewise_ebf_Llama-2-70B_bf.pdf]

# Llama-3-70B-Instruct

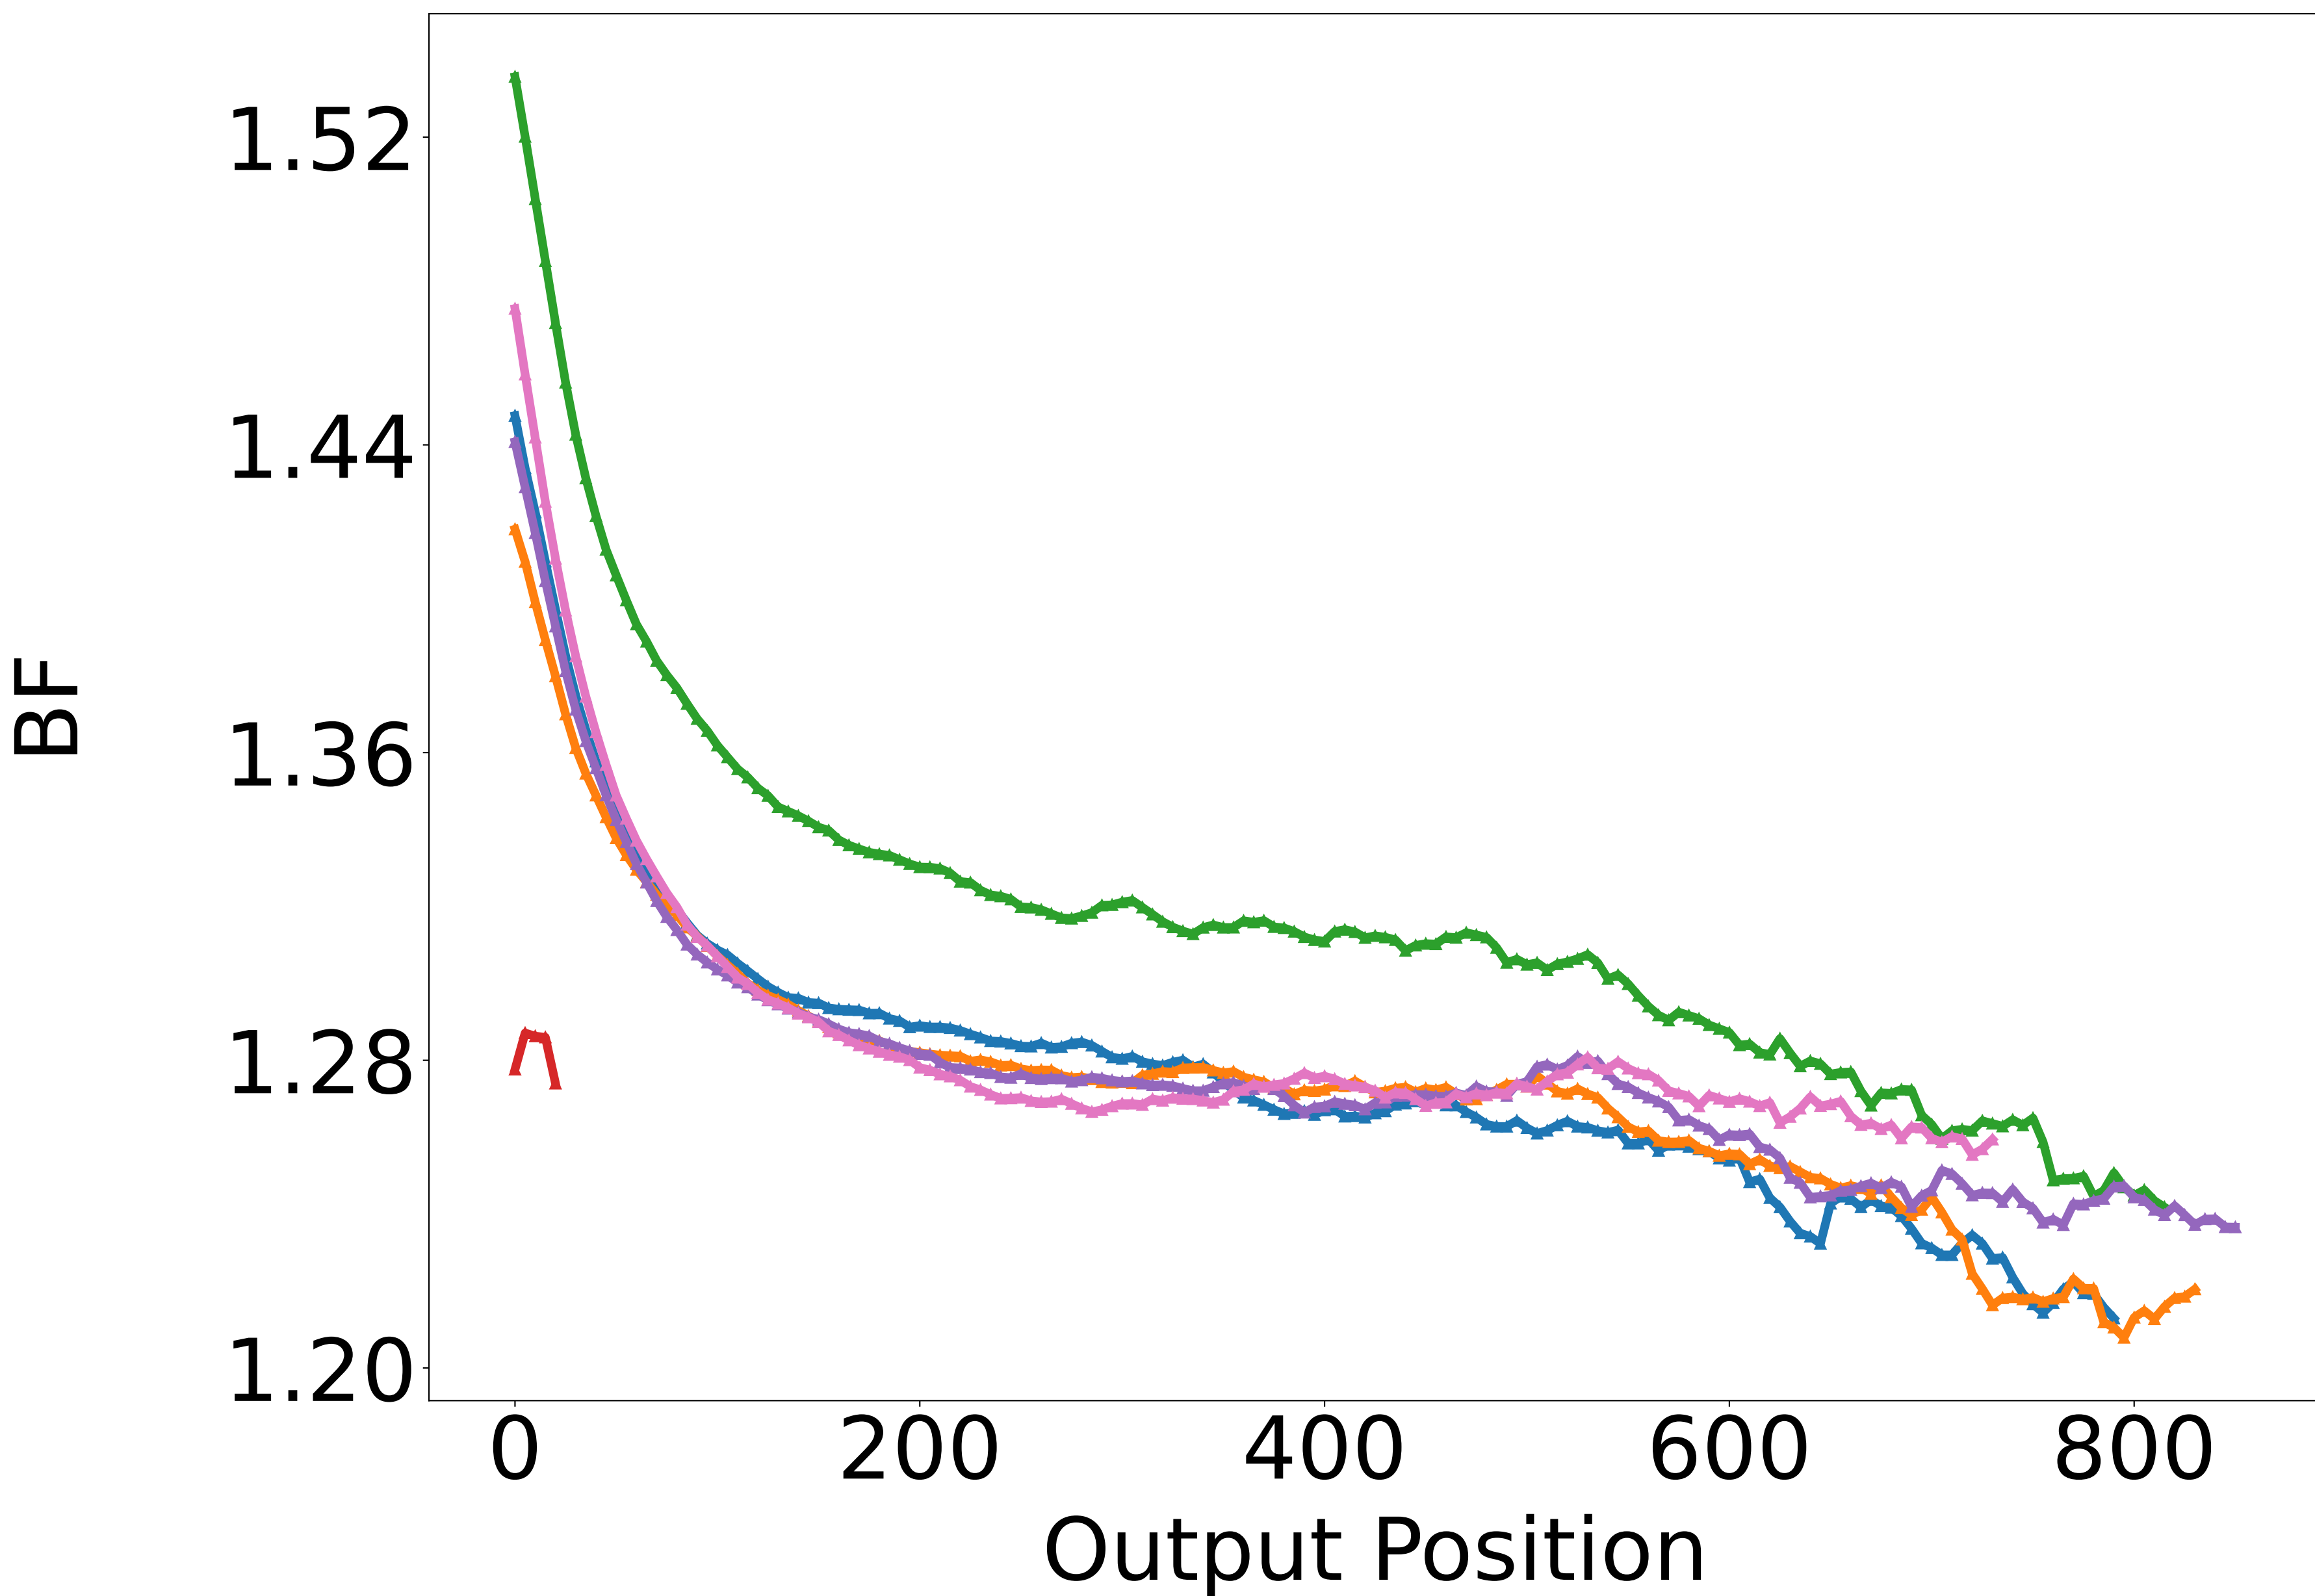

## Prompt Complexity (C)



Supplement: supplementary_material [file piecewise_ebf_Llama-3-70B-Instruct_bf.pdf › supplementary_materials/bf_output_dynamic/creative_story_gen/piecewise_ebf_Llama-3-70B-Instruct_bf.pdf]

# Llama-3-70B-Instruct

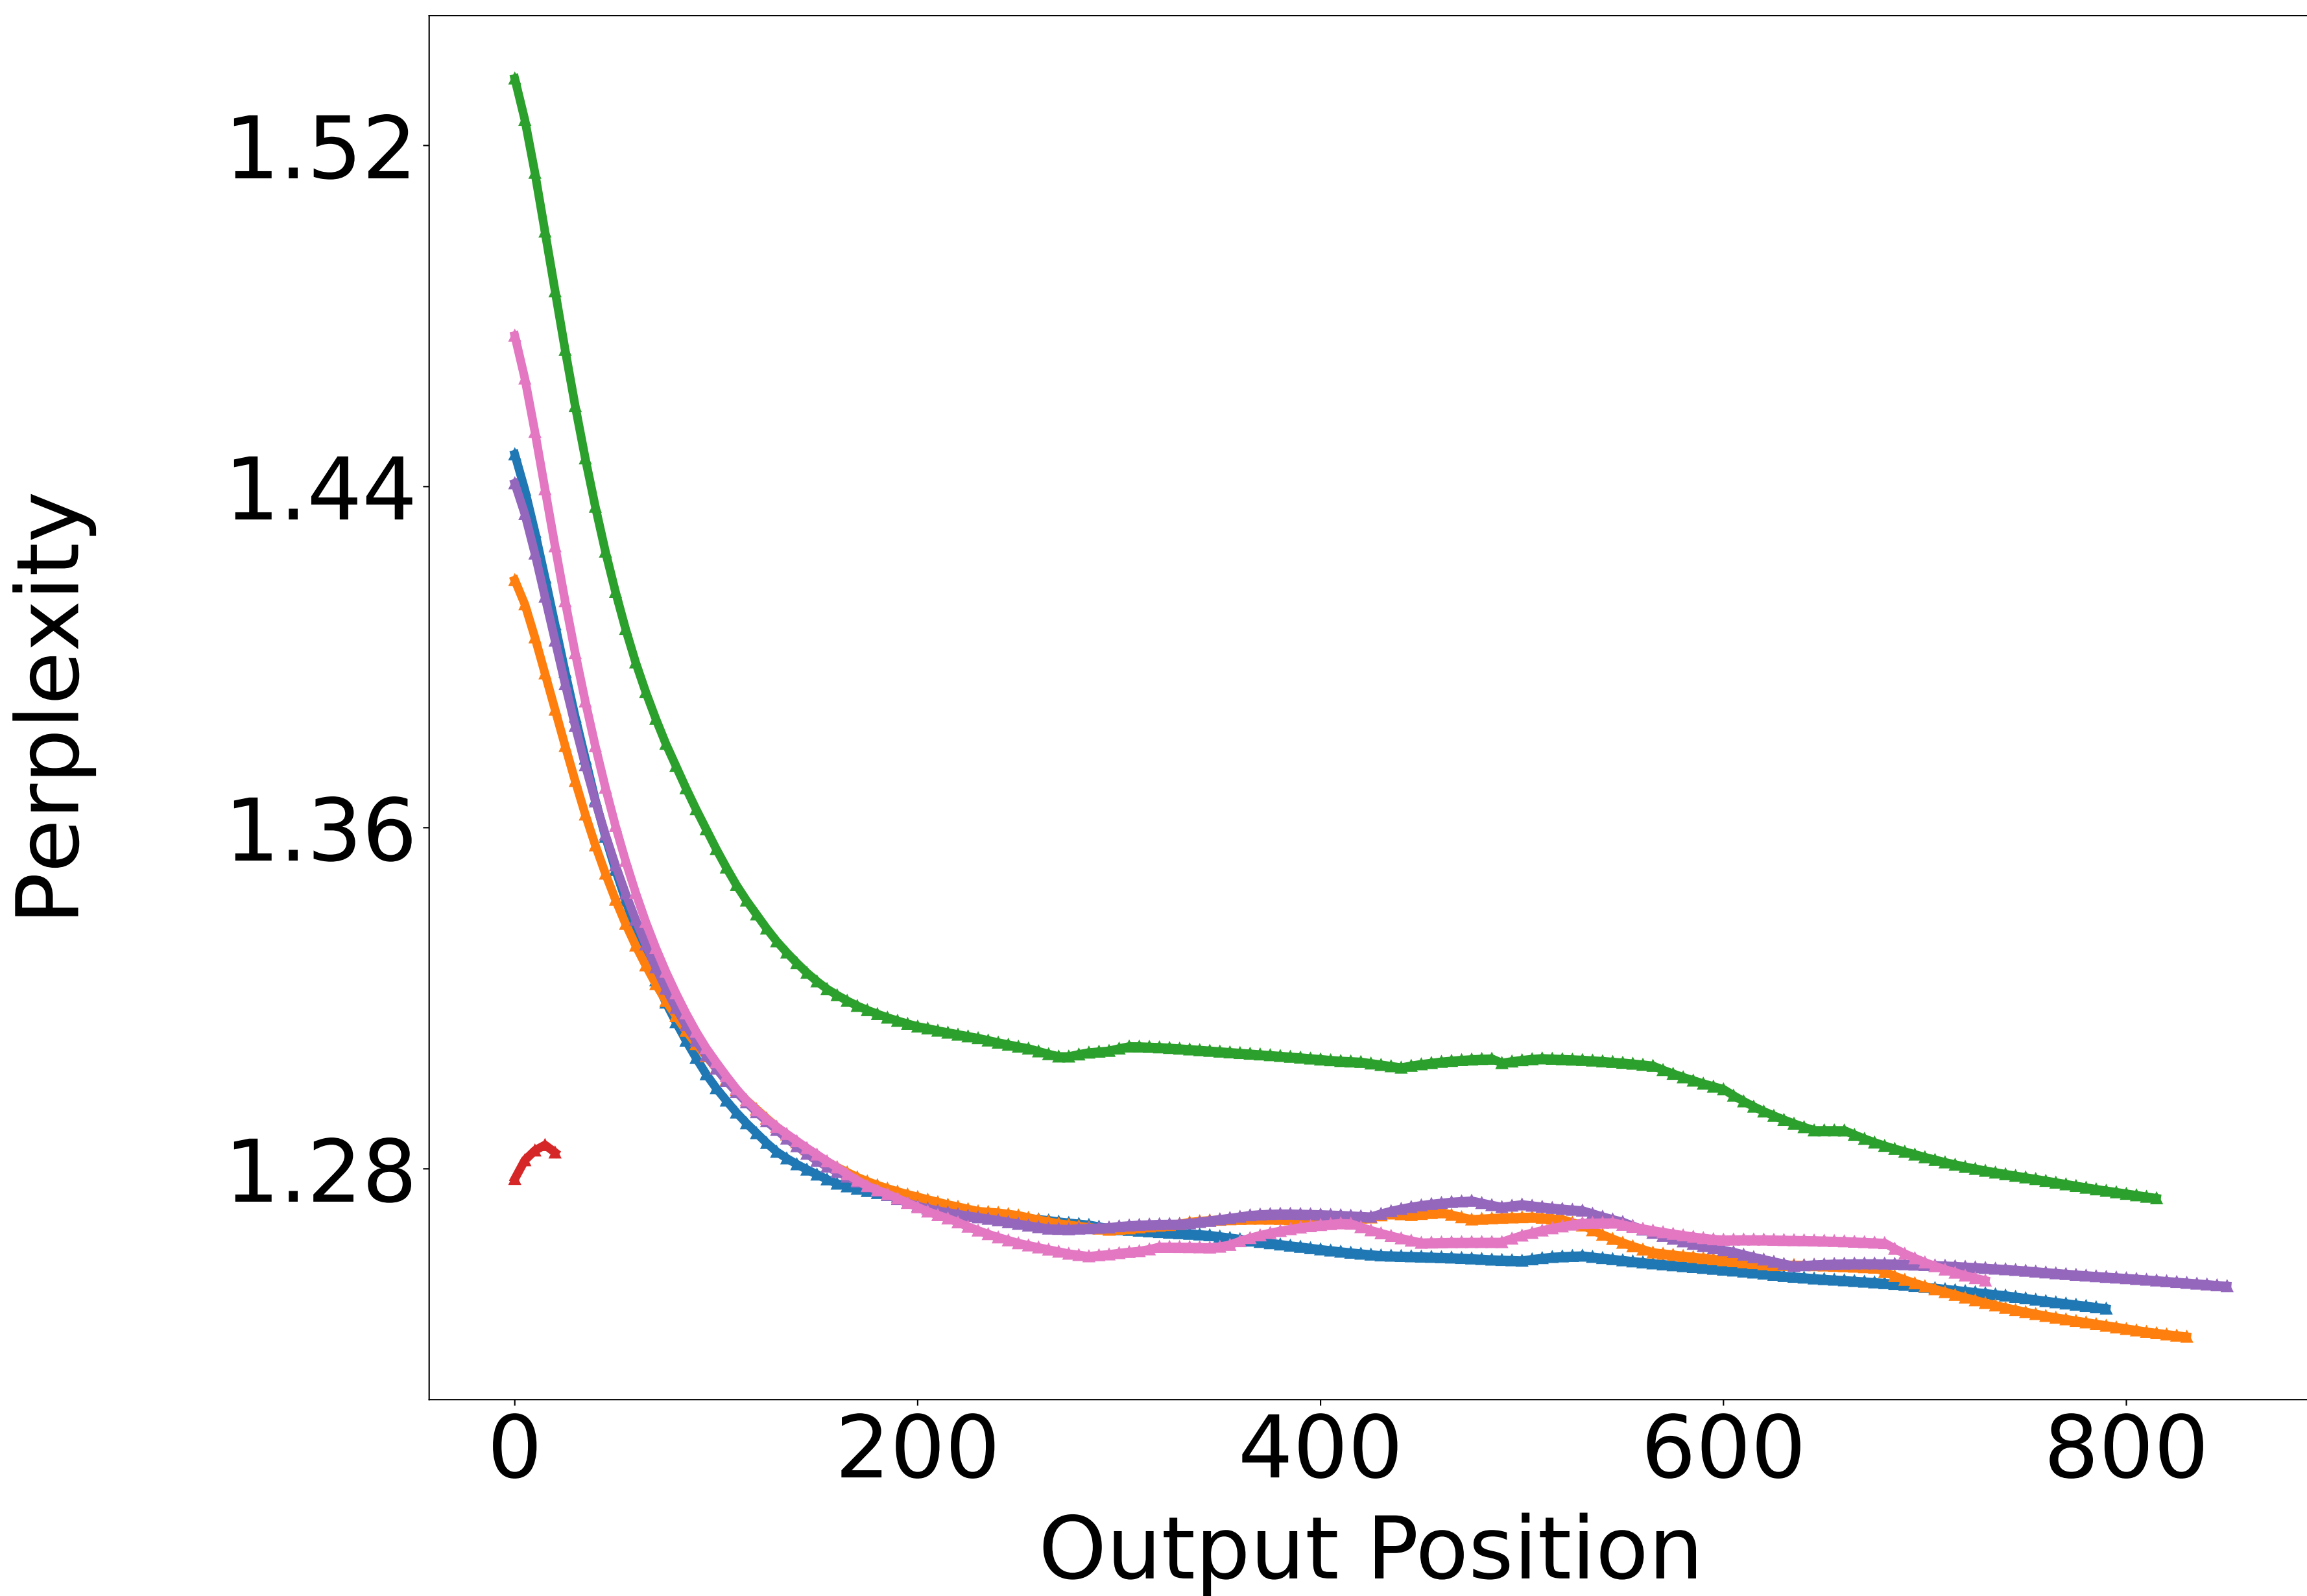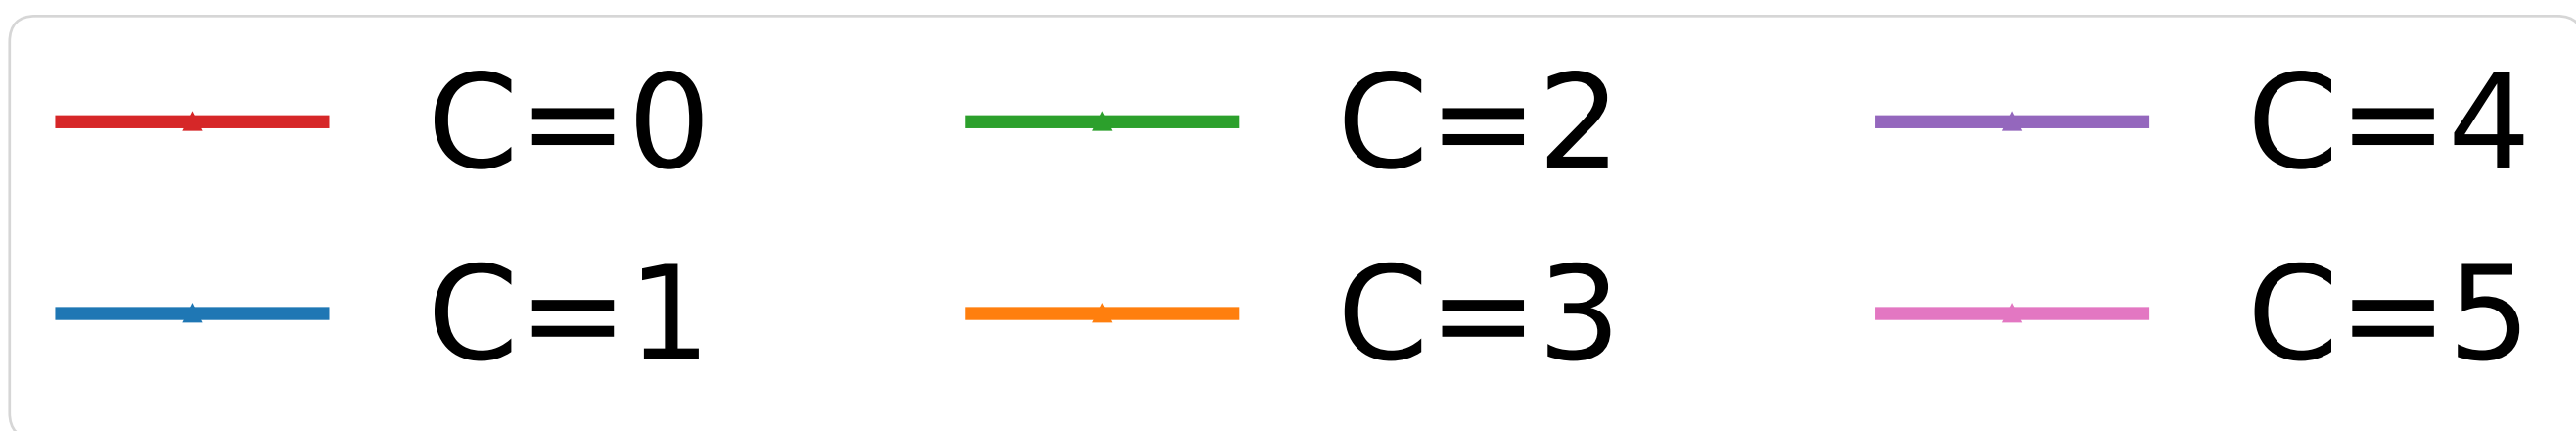

Supplement: supplementary_material [file piecewise_ebf_Llama-3-70B-Instruct_bf_fixed_start.pdf › supplementary_materials/bf_output_dynamic/creative_story_gen/piecewise_ebf_Llama-3-70B-Instruct_bf_fixed_start.pdf]

# Llama-3-70B

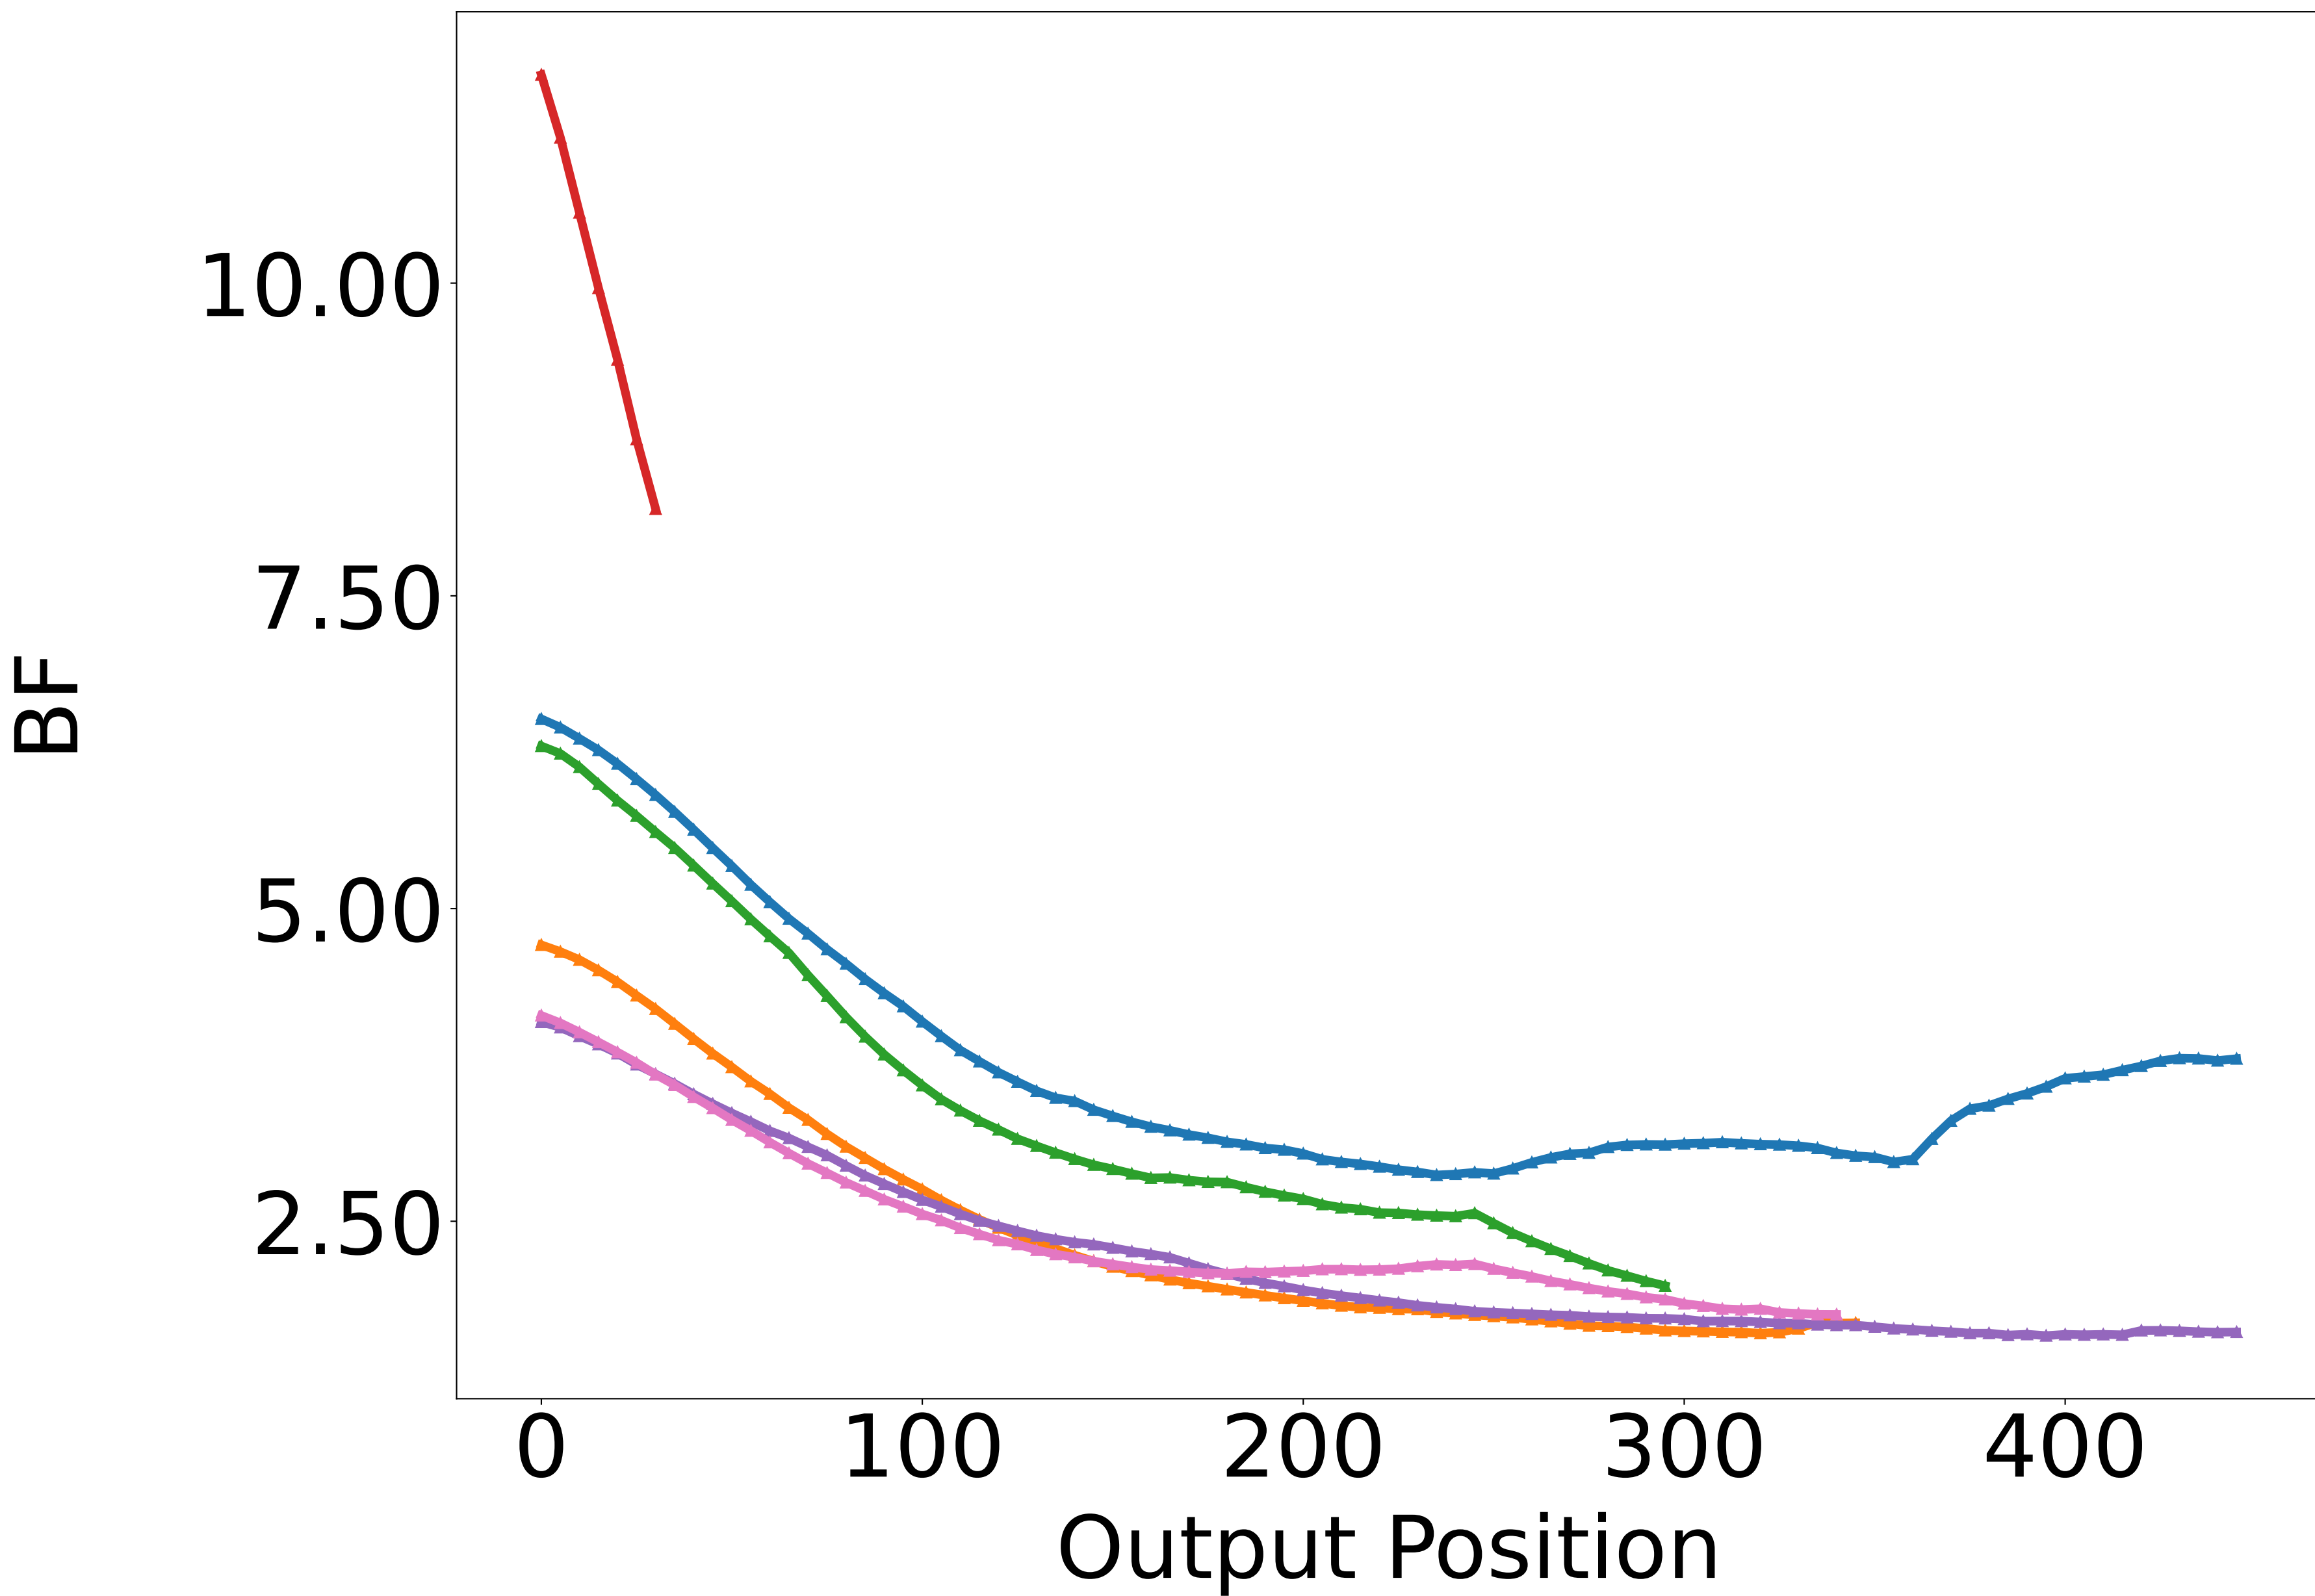

## Prompt Complexity (C)

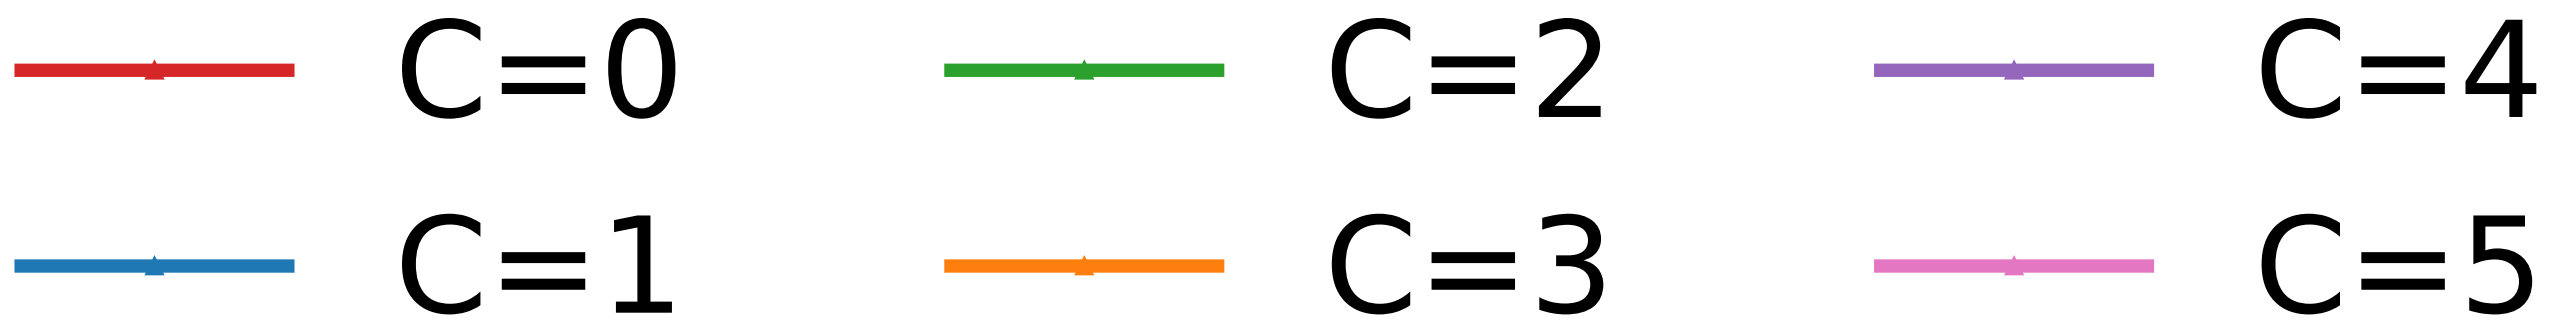

Supplement: supplementary_material [file piecewise_ebf_Llama-3-70B_bf.pdf › supplementary_materials/bf_output_dynamic/creative_story_gen/piecewise_ebf_Llama-3-70B_bf.pdf]

# Llama-3-8B-Instruct

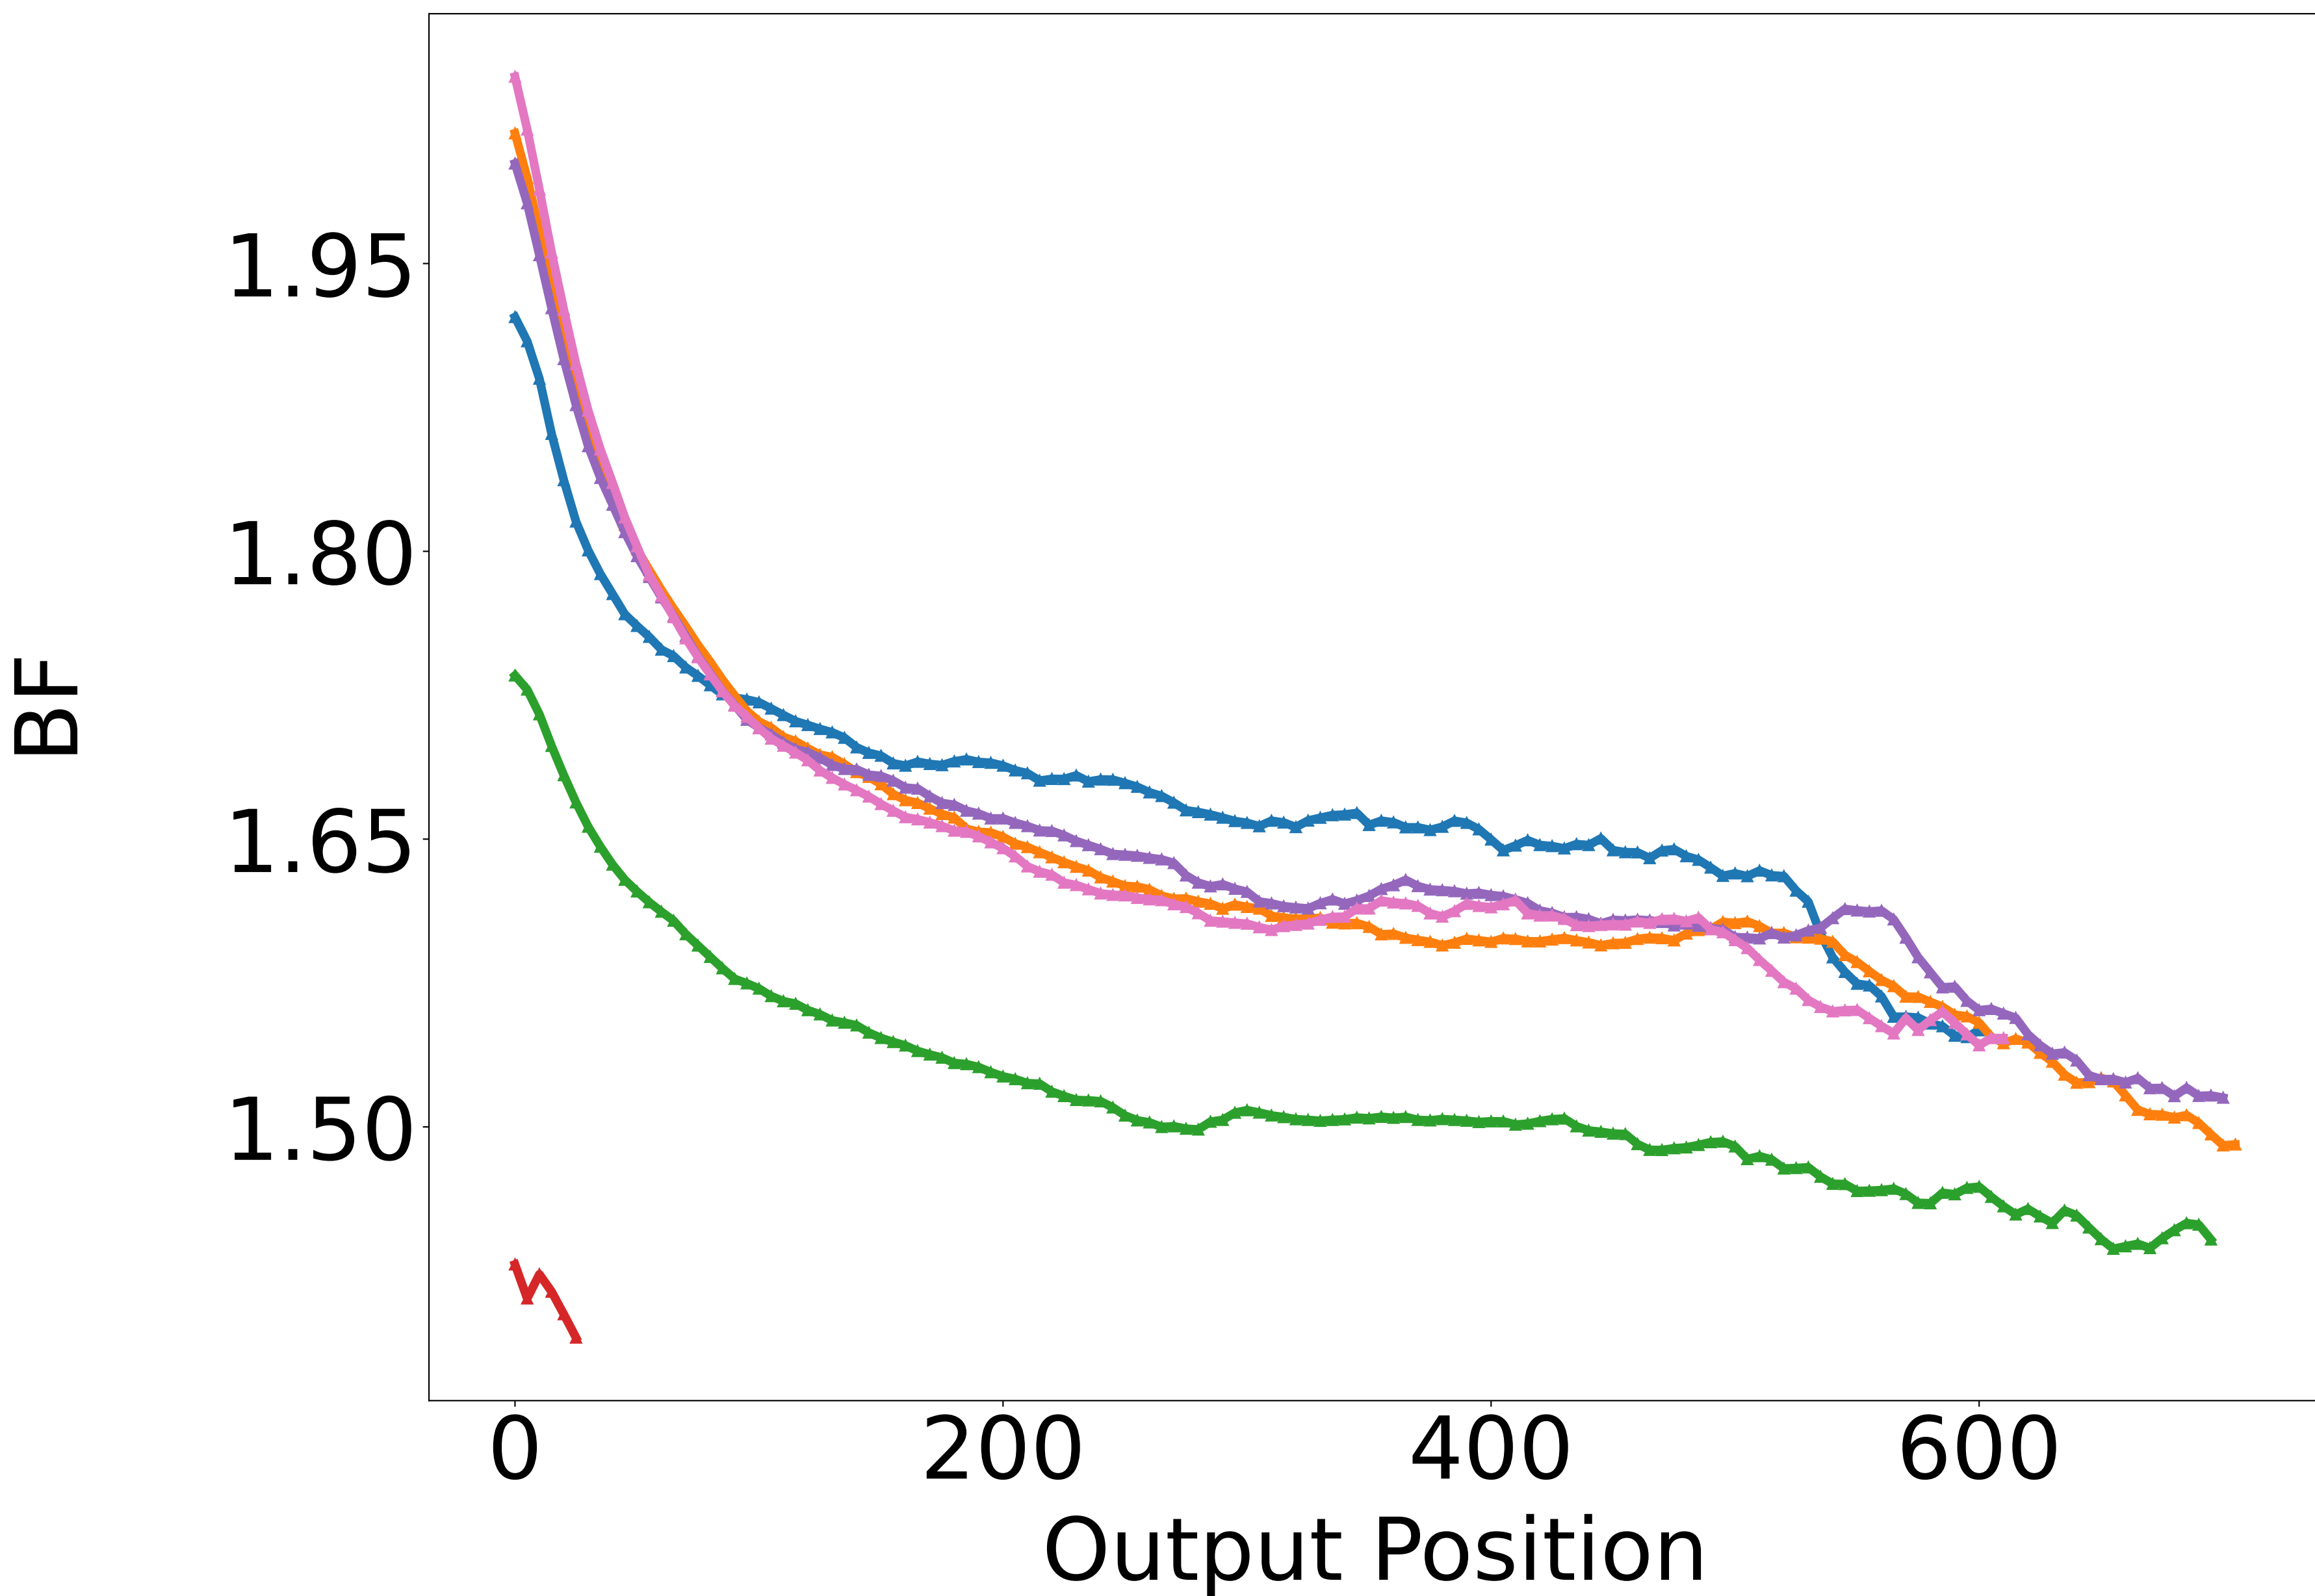

## Prompt Complexity (C)



Supplement: supplementary_material [file piecewise_ebf_Llama-3-8B-Instruct_bf.pdf › supplementary_materials/bf_output_dynamic/creative_story_gen/piecewise_ebf_Llama-3-8B-Instruct_bf.pdf]

# Llama-3-8B

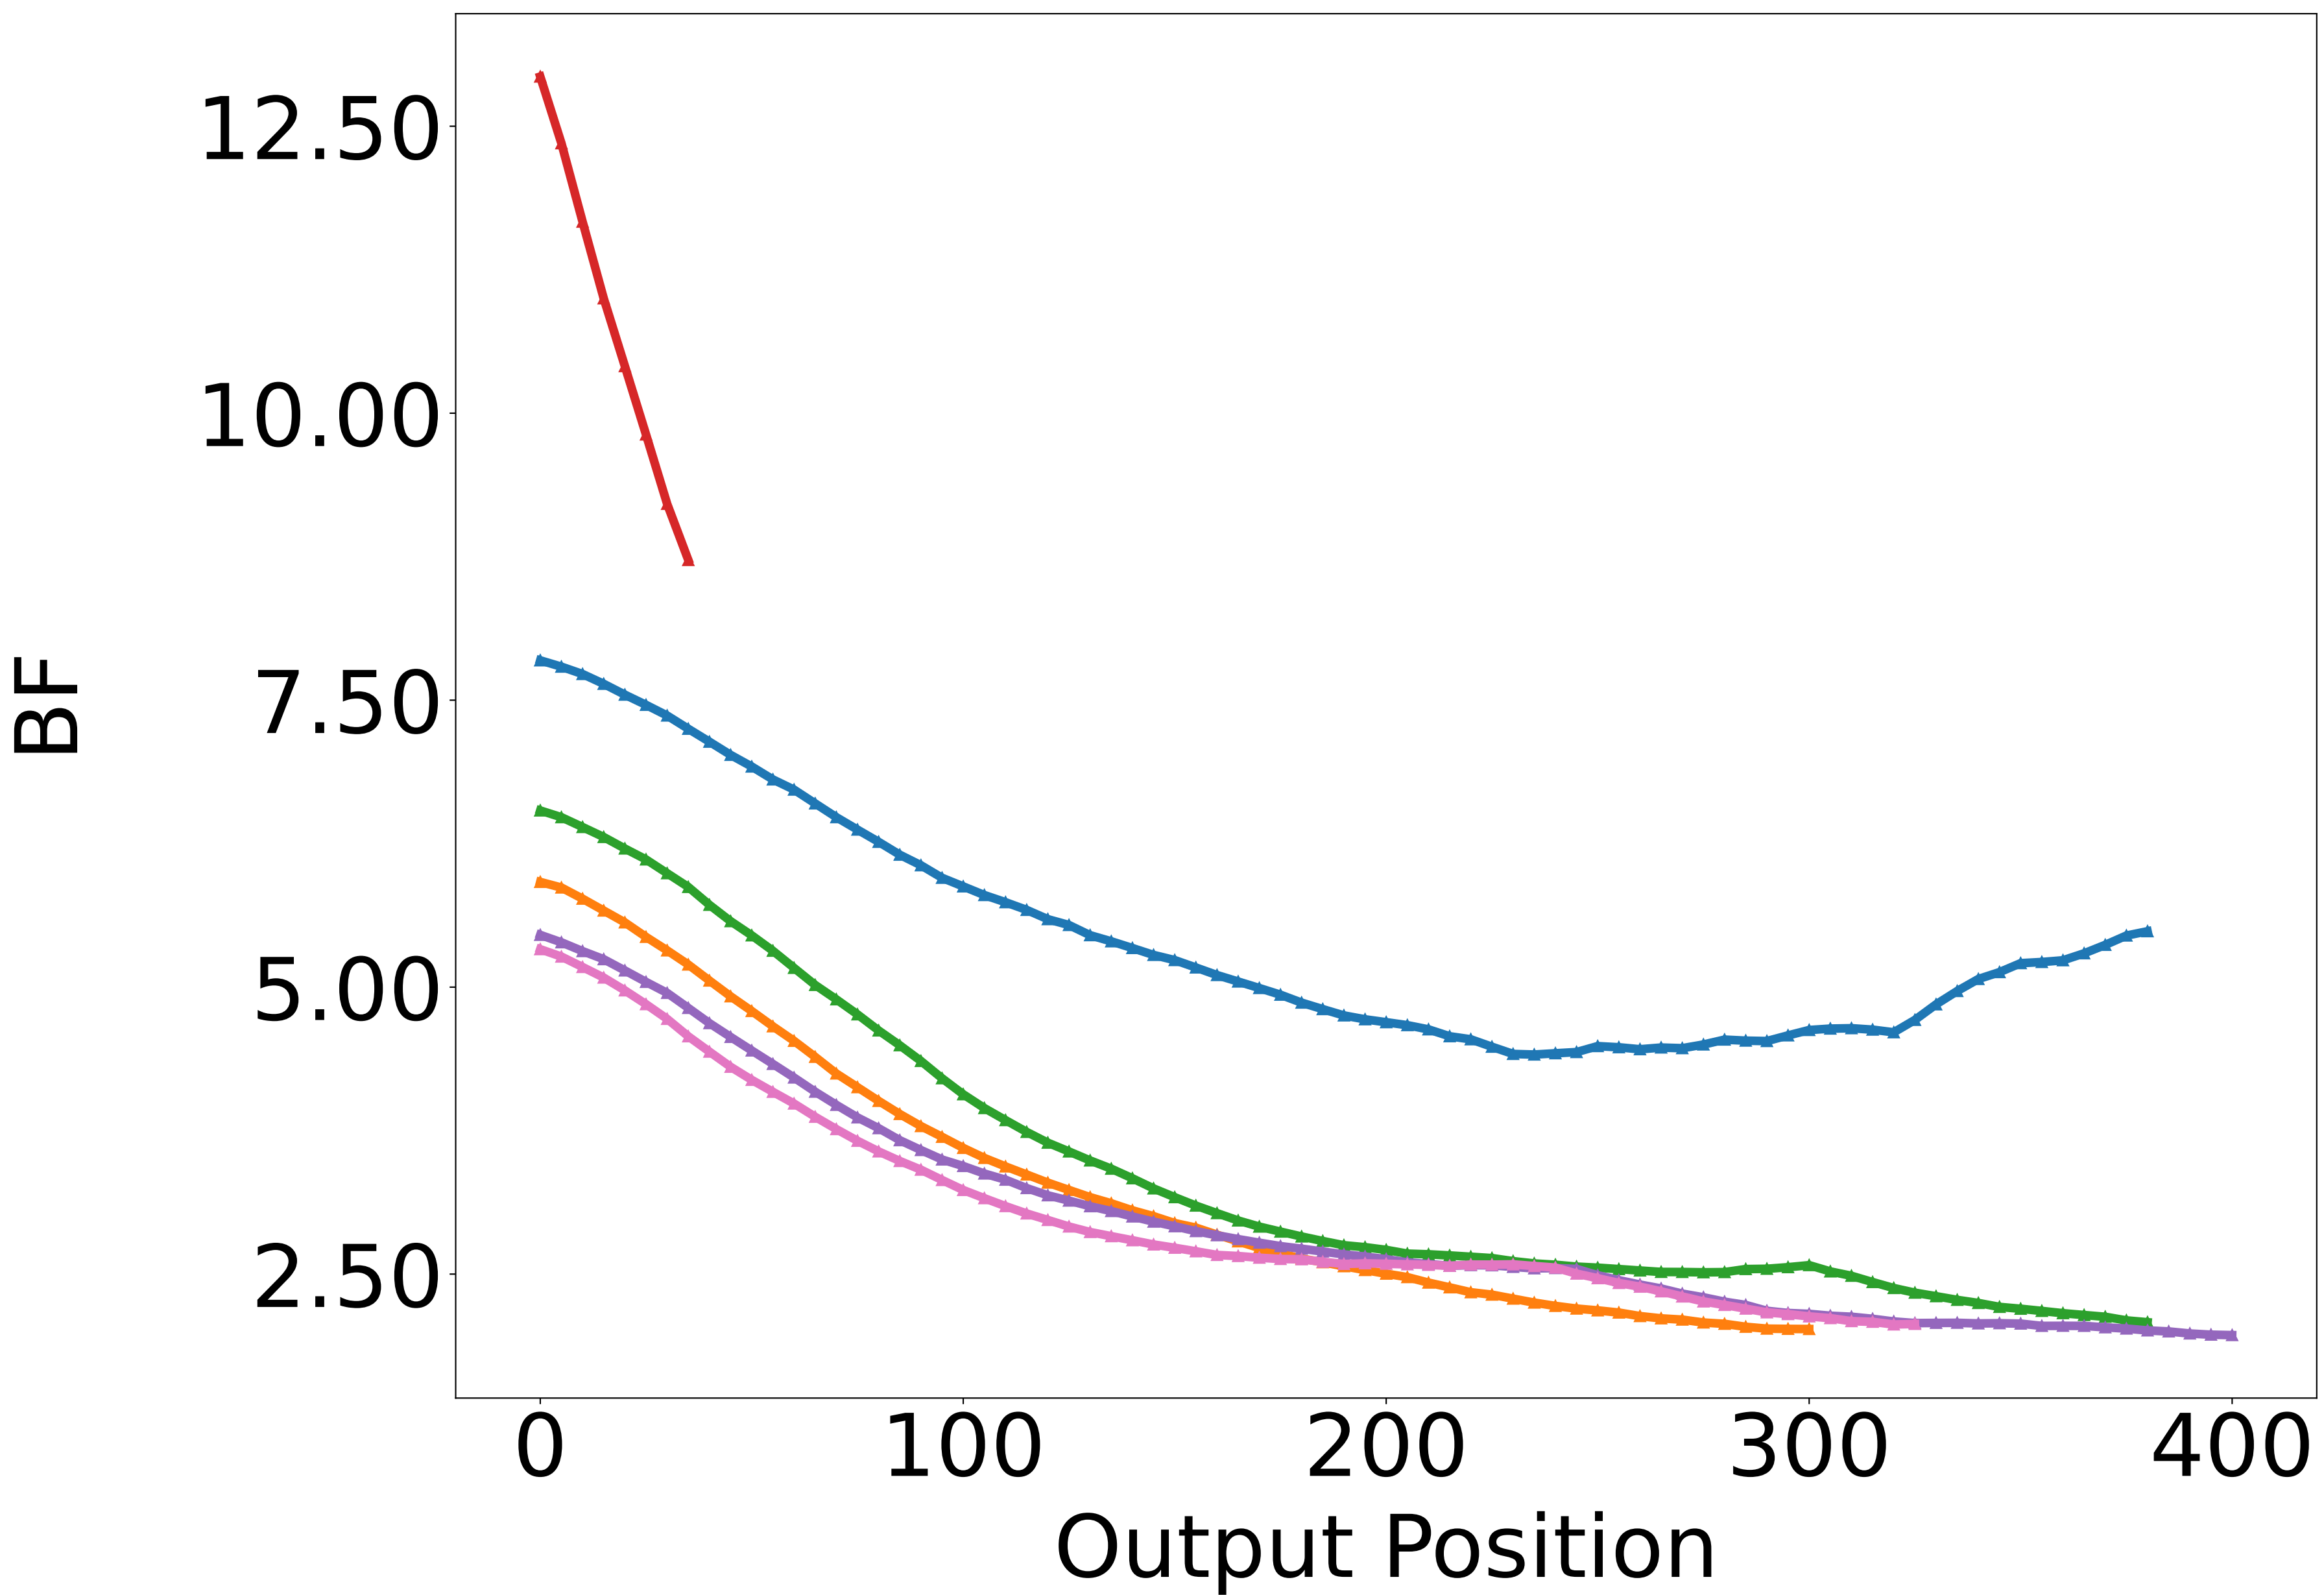

## Prompt Complexity (C)



Supplement: supplementary_material [file piecewise_ebf_Llama-3-8B_bf.pdf › supplementary_materials/bf_output_dynamic/creative_story_gen/piecewise_ebf_Llama-3-8B_bf.pdf]

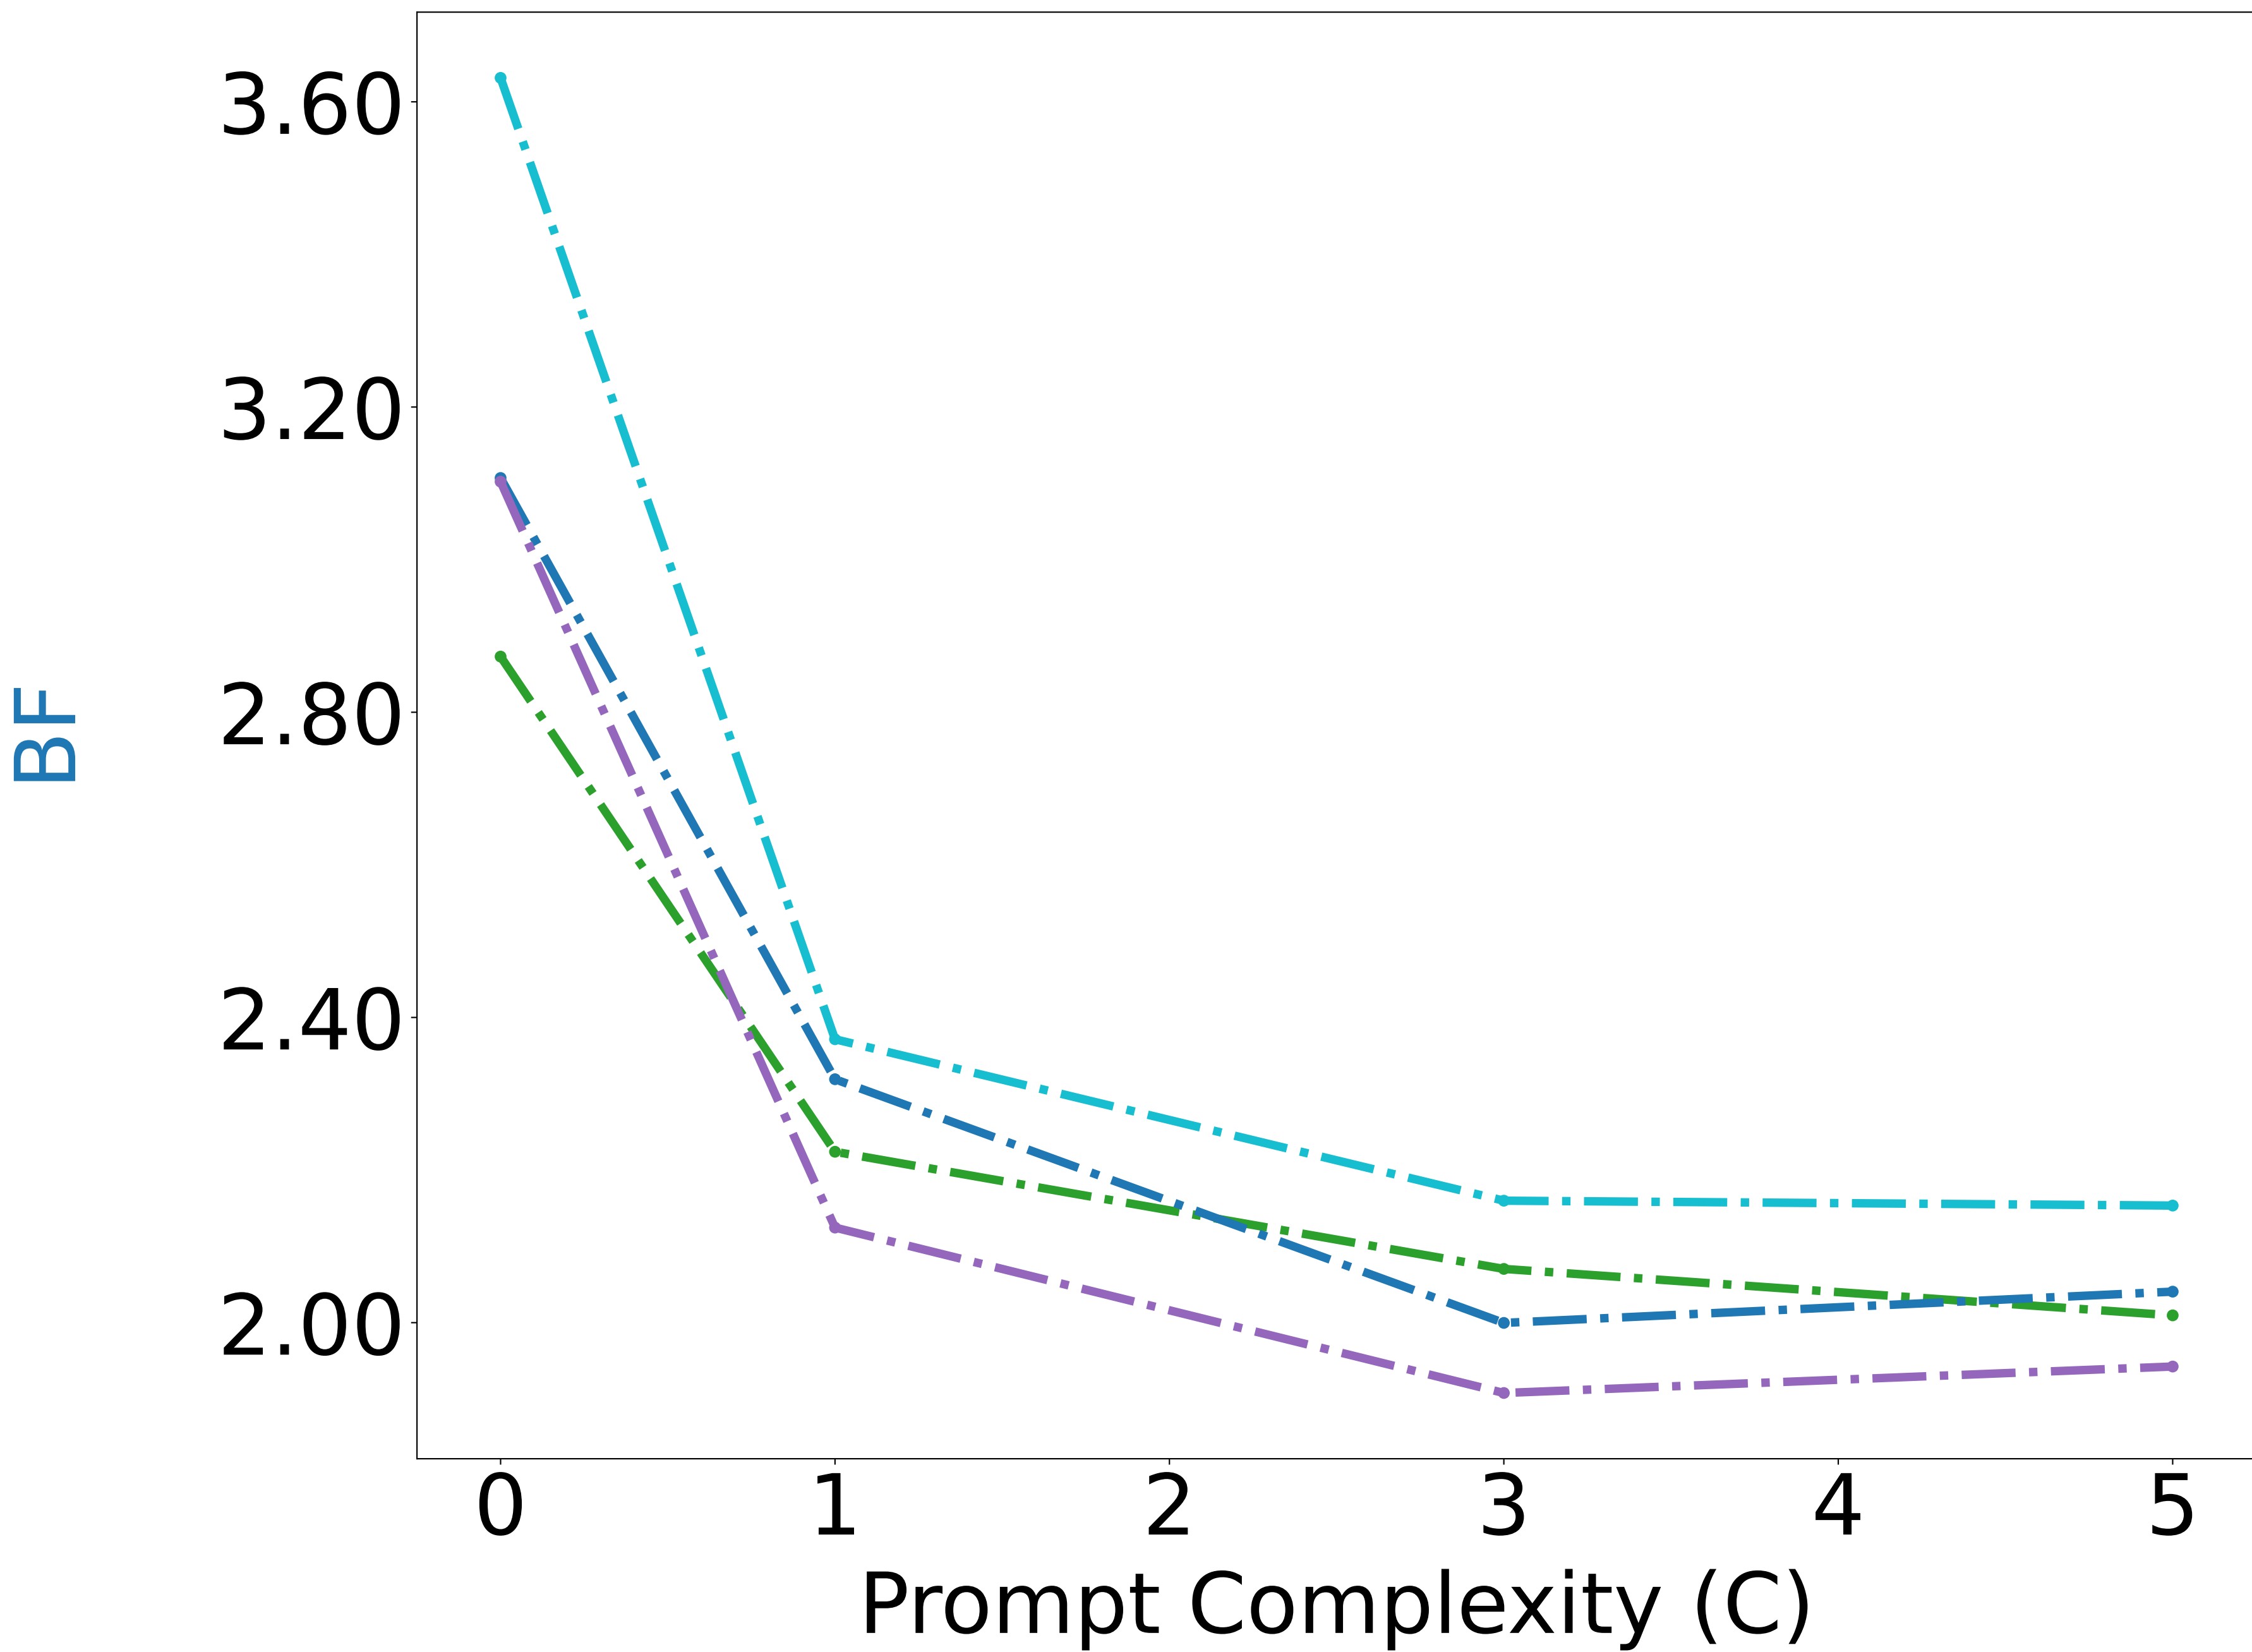

— Llama-2-13B

— Llama-2-70B

— Llama-3-70B

— Llama-3-8B

Supplement: supplementary_material [file model_wise_comparison_base_cot_ebf_bf.pdf › supplementary_materials/bf_output_dynamic/mmlu/model_wise_comparison_base_cot_ebf_bf.pdf]

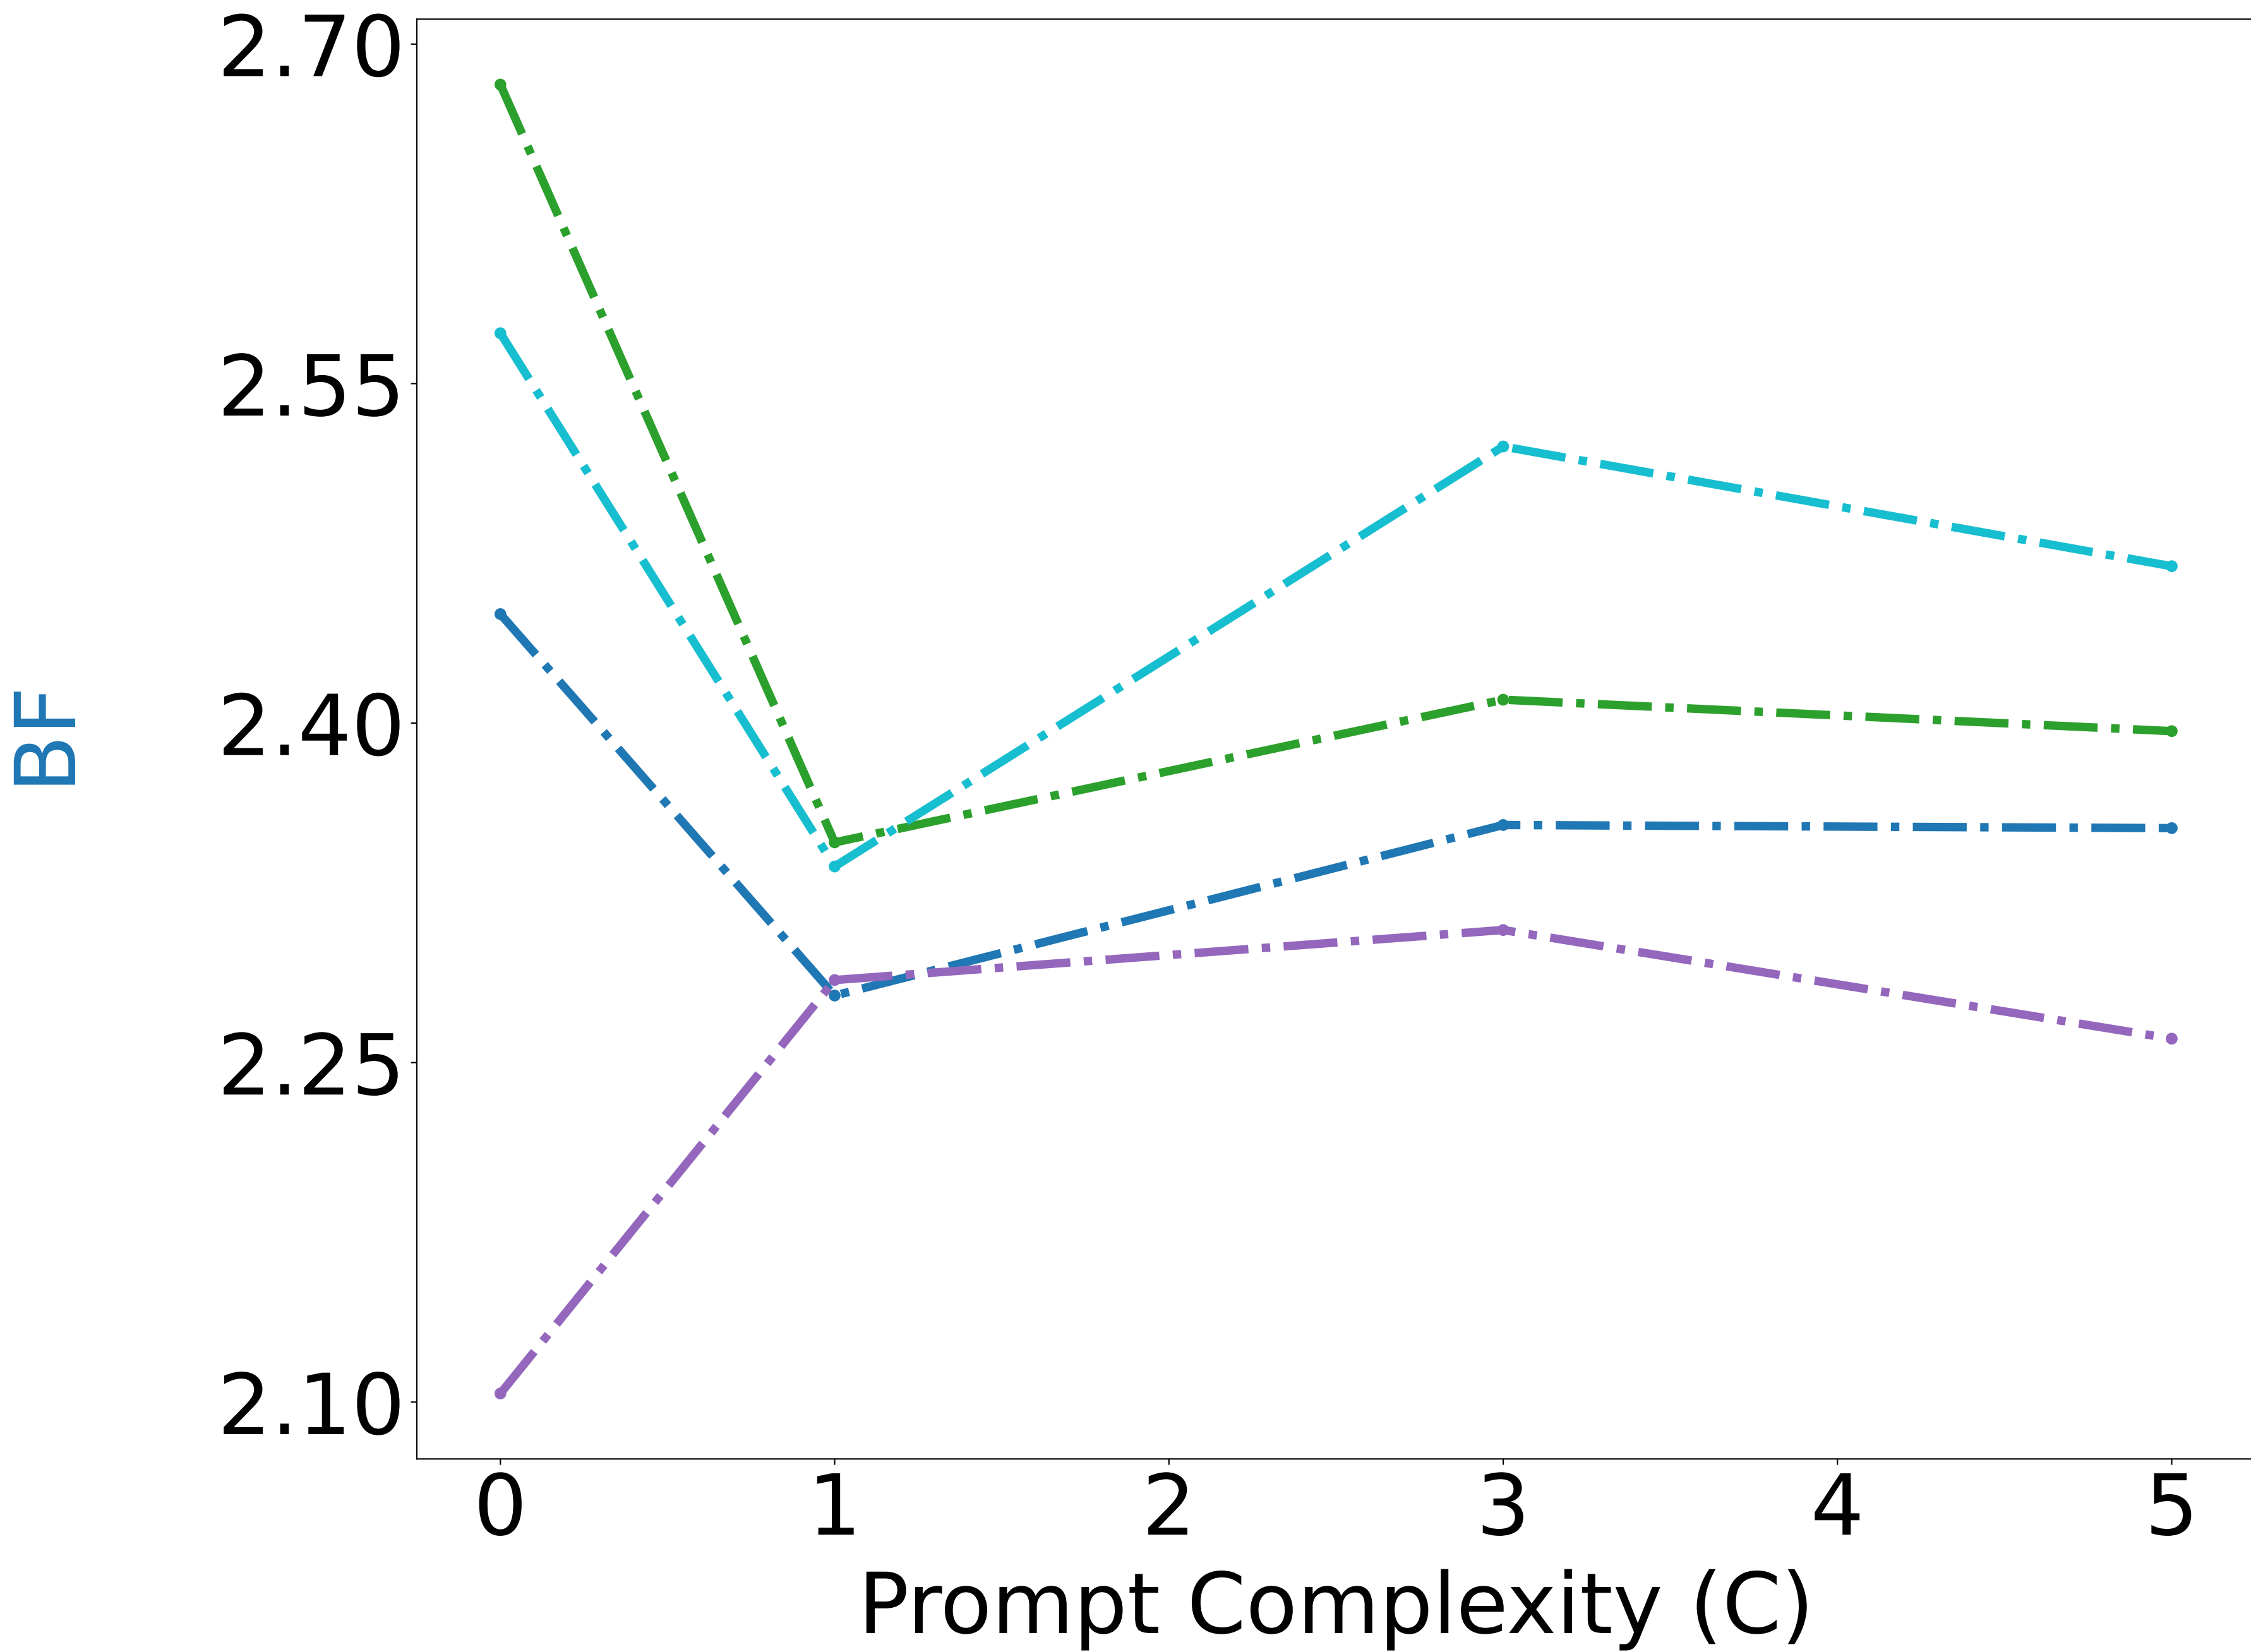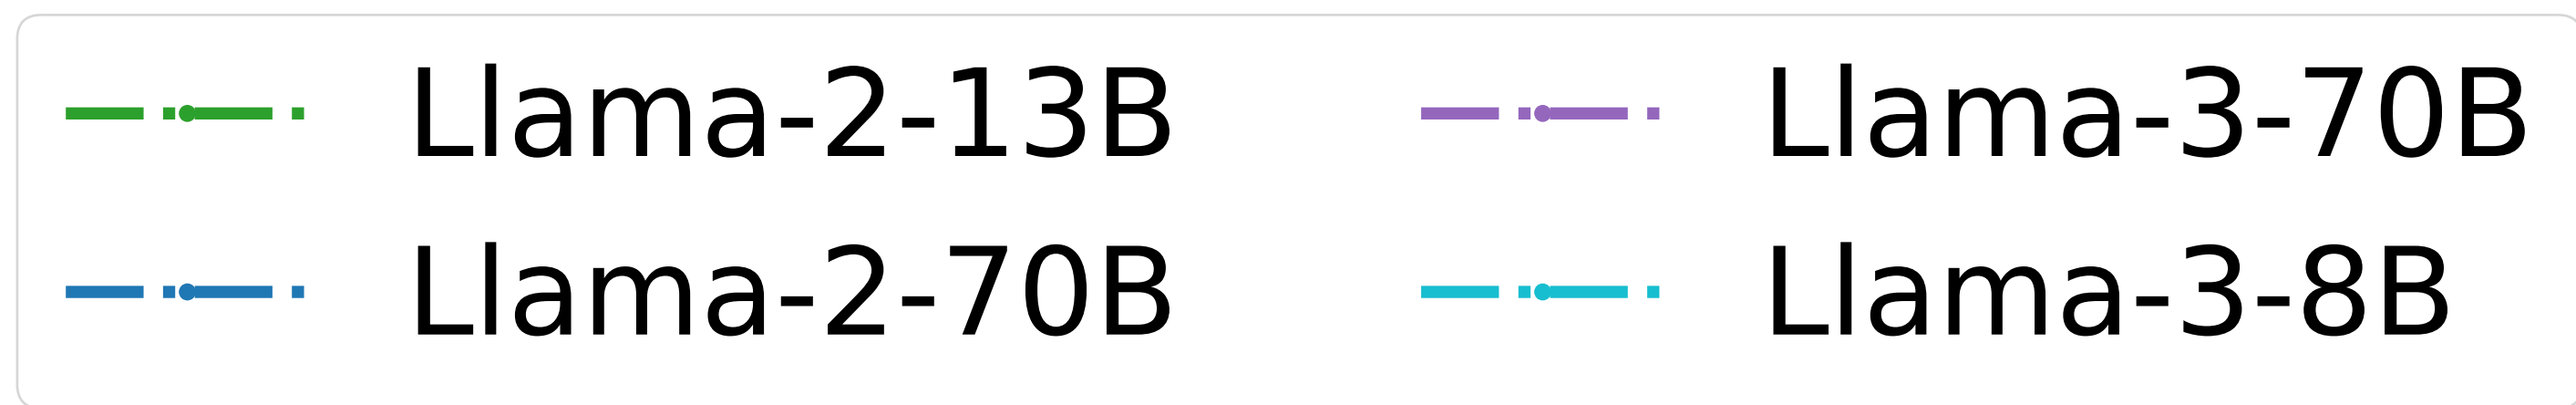

Supplement: supplementary_material [file model_wise_comparison_base_standard_ebf_bf.pdf › supplementary_materials/bf_output_dynamic/mmlu/model_wise_comparison_base_standard_ebf_bf.pdf]

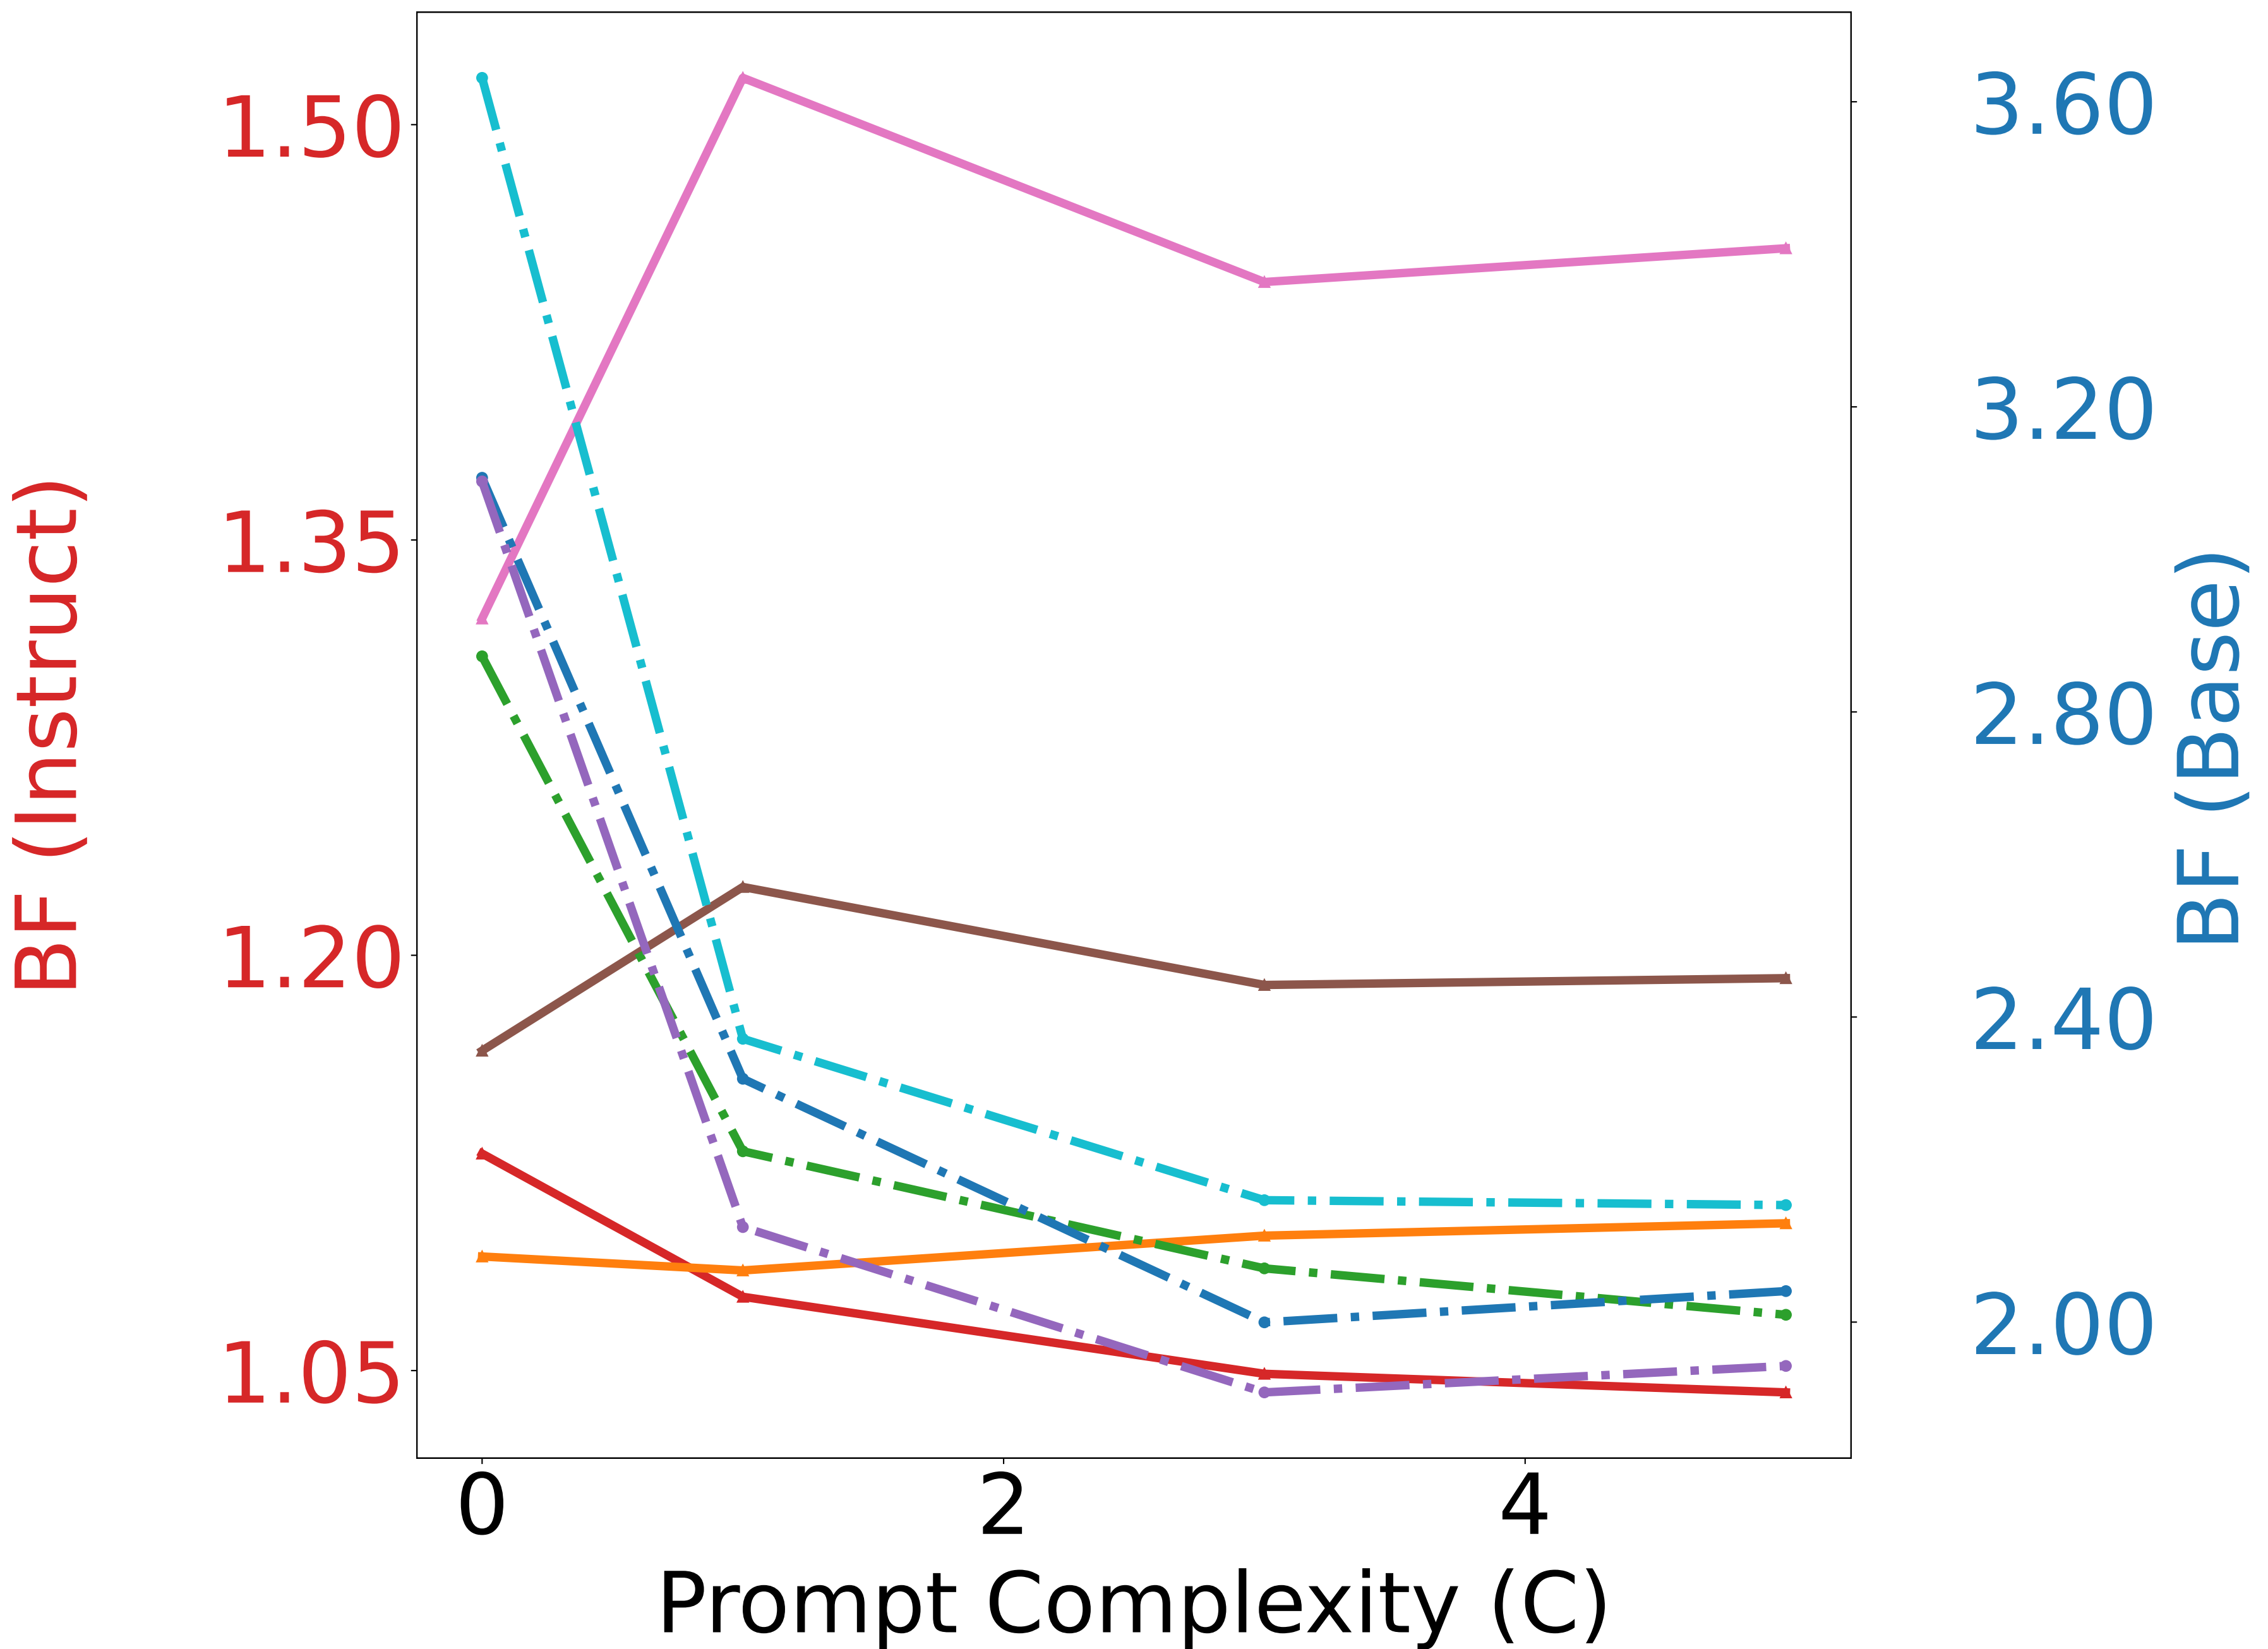

- |                                                                                     |                      |                                                                                       |             |
|-------------------------------------------------------------------------------------|----------------------|---------------------------------------------------------------------------------------|-------------|
|  | Llama-2-13B-chat     |  | Llama-2-13B |
|  | Llama-2-70B-chat     |  | Llama-2-70B |
|  | Llama-3-70B-Instruct |  | Llama-3-70B |
|  | Llama-3-8B-Instruct  |  | Llama-3-8B  |

Supplement: supplementary_material [file model_wise_comparison_cot_ebf_bf.pdf › supplementary_materials/bf_output_dynamic/mmlu/model_wise_comparison_cot_ebf_bf.pdf]

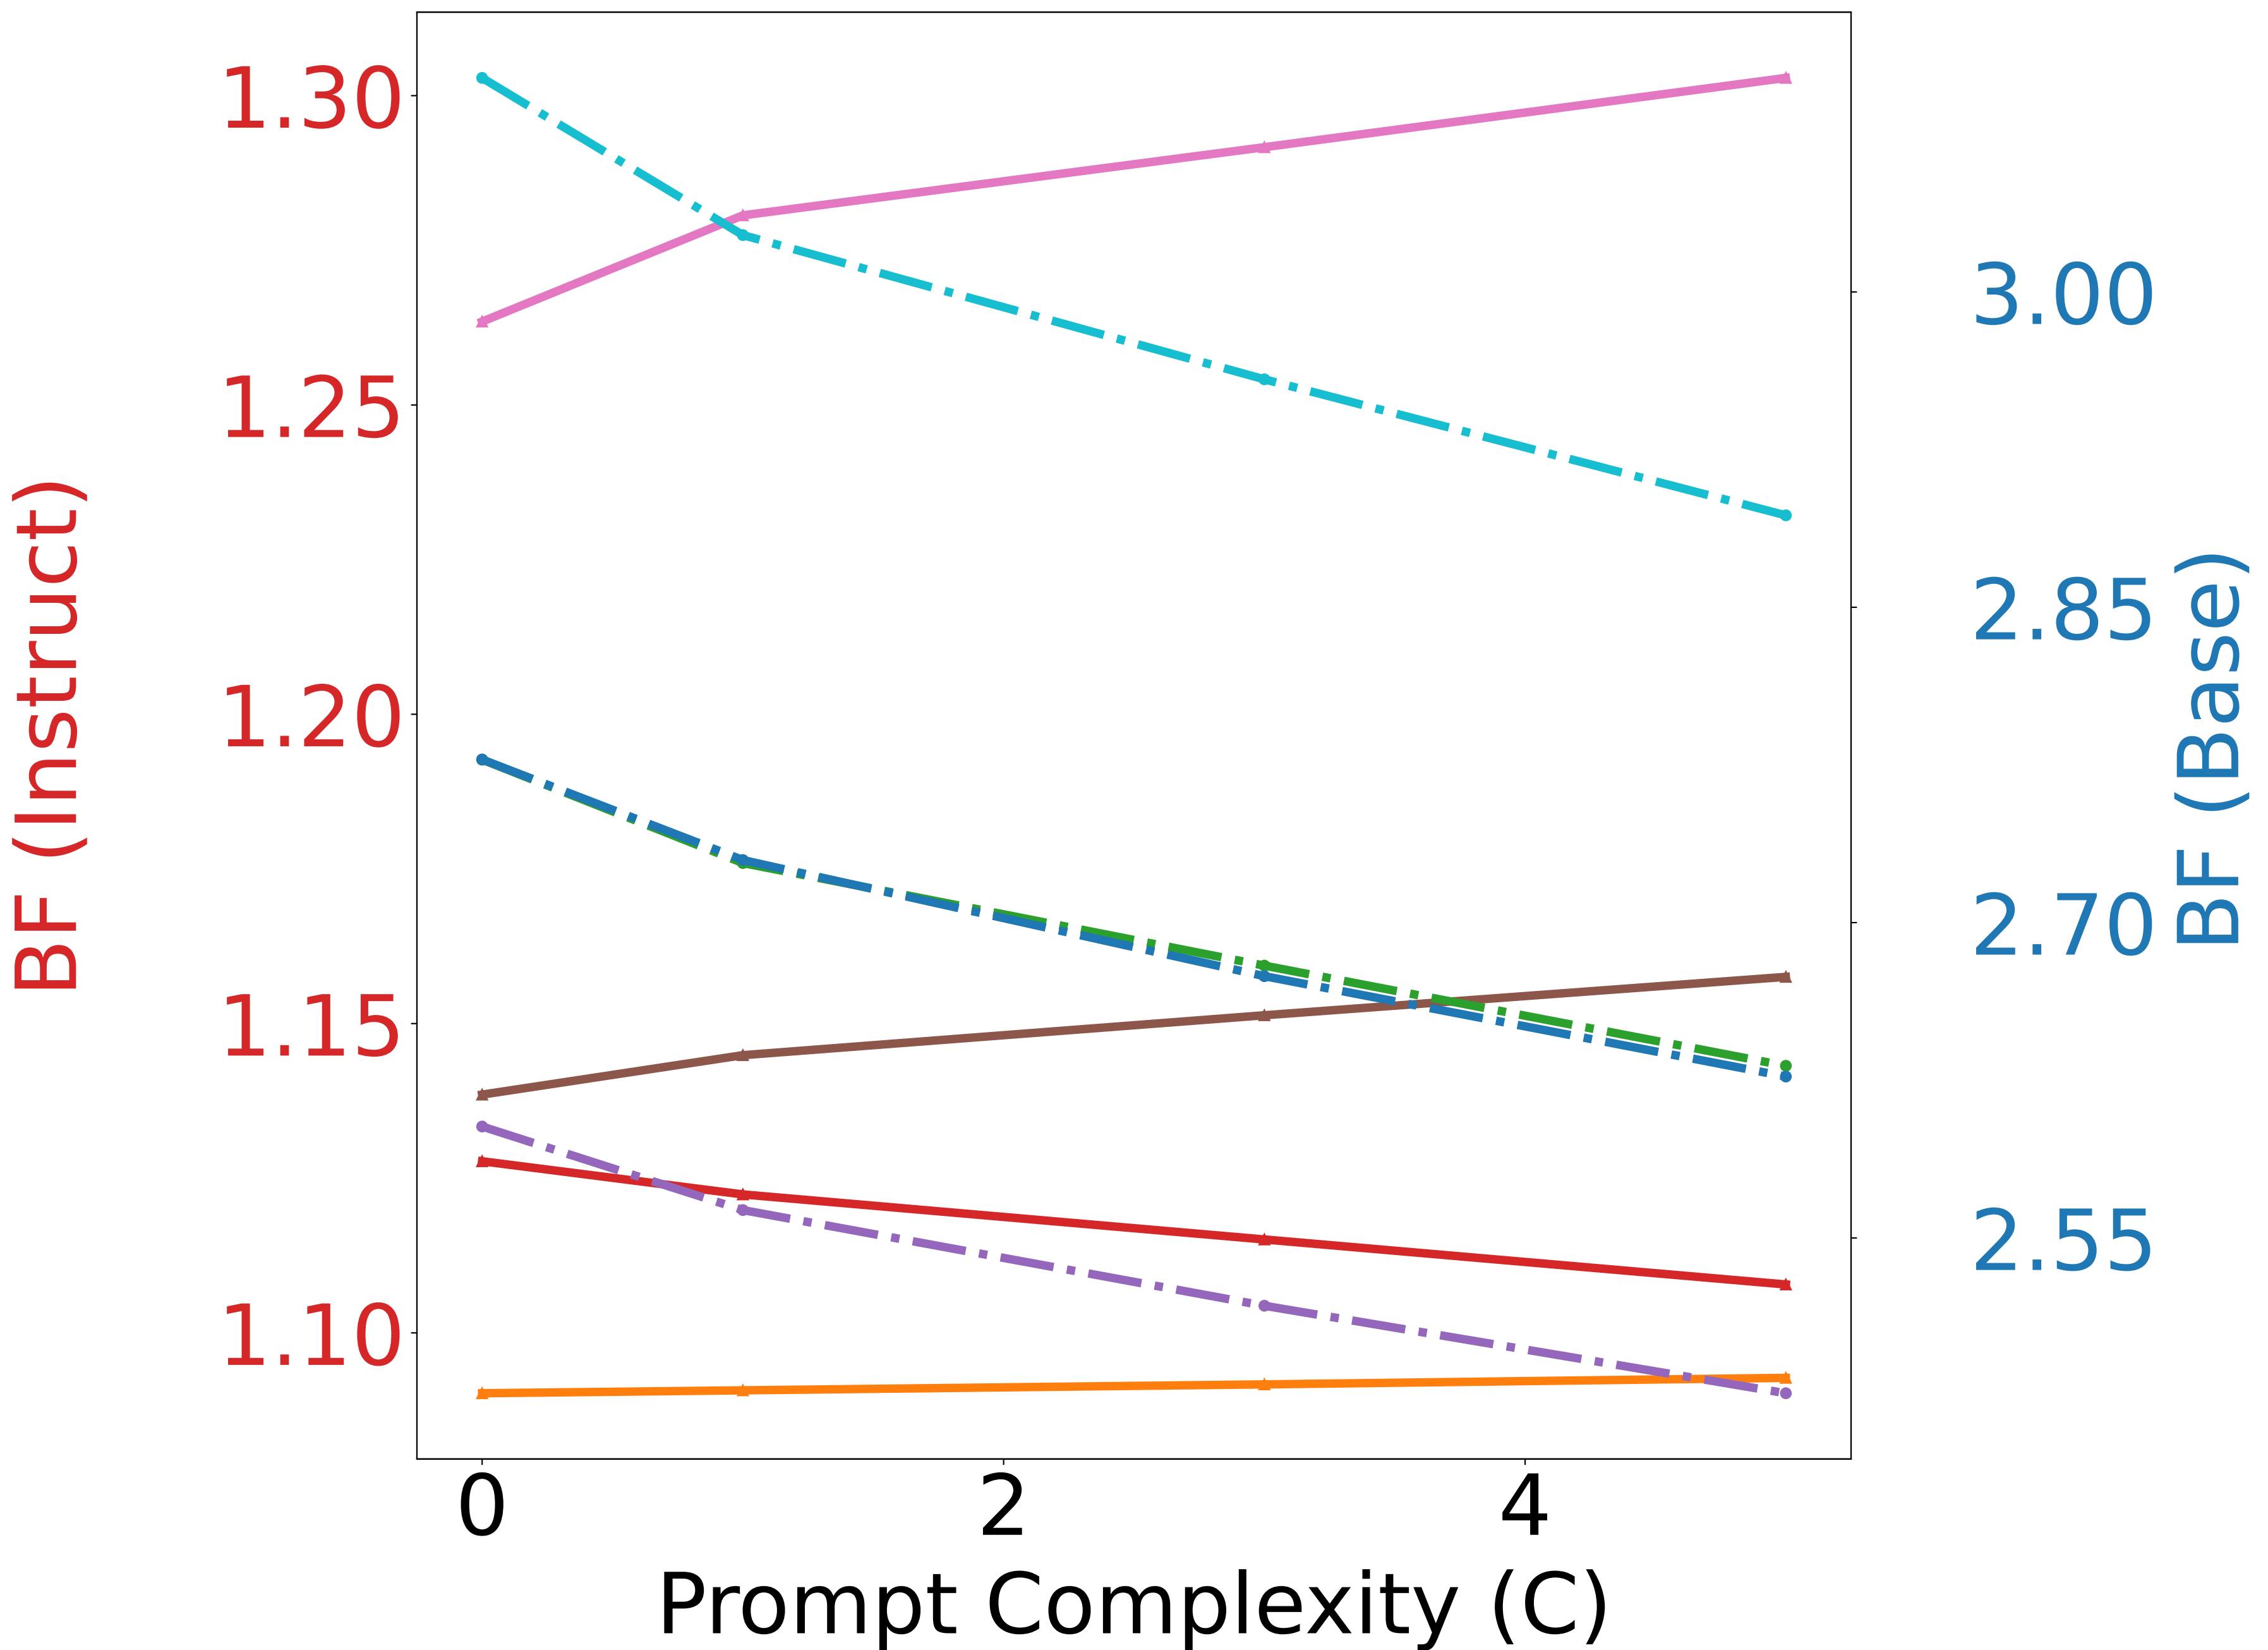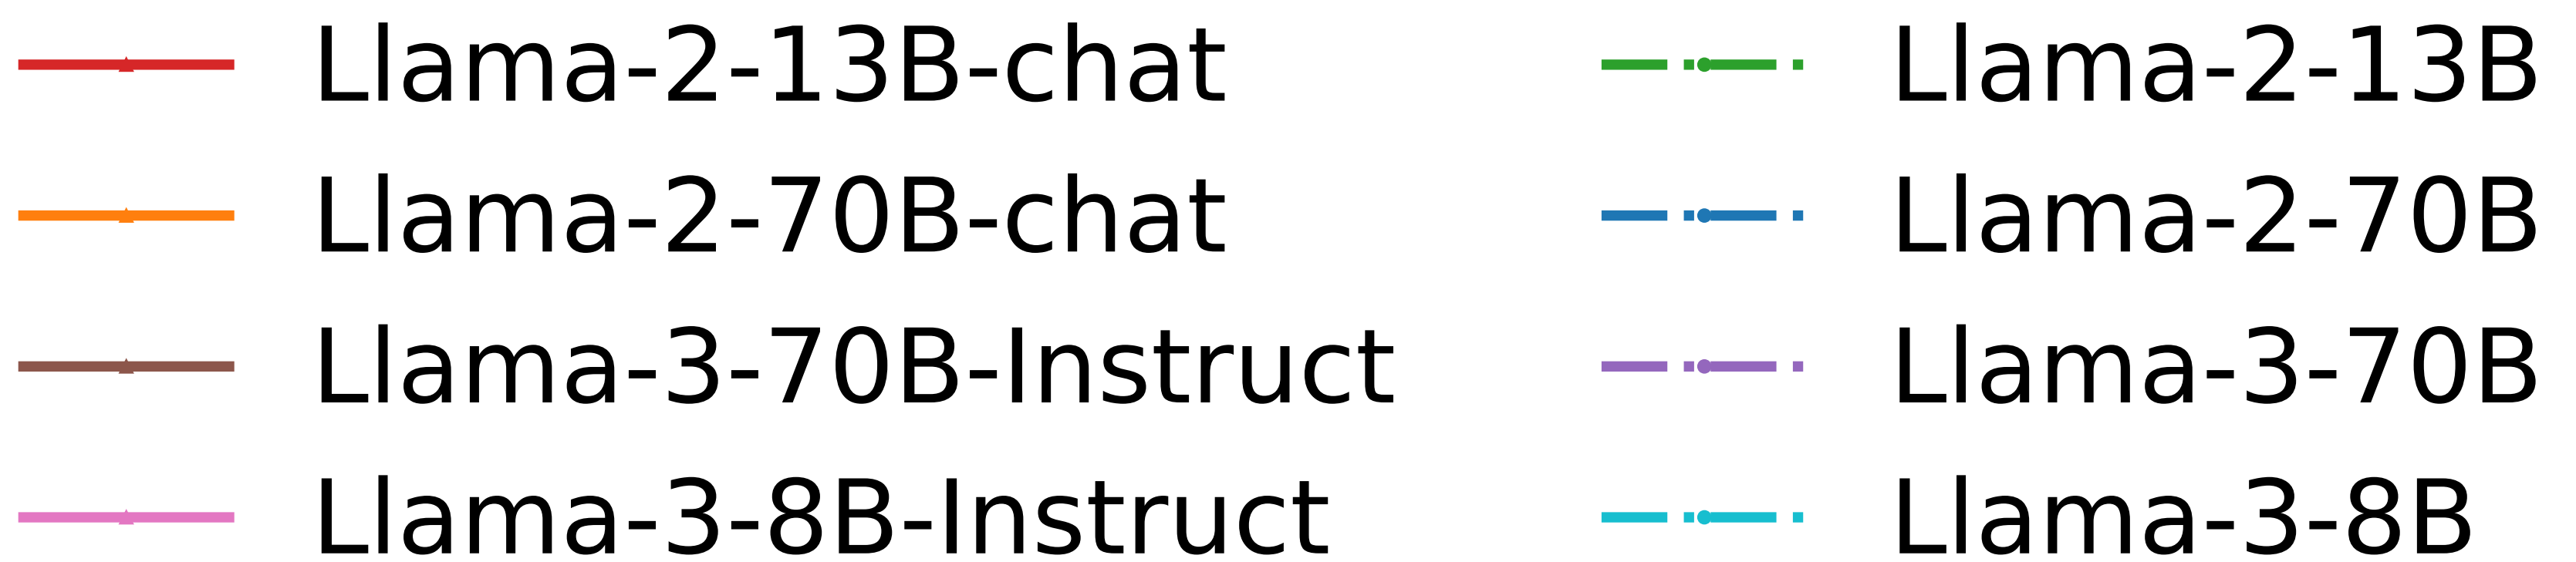

Supplement: supplementary_material [file model_wise_comparison_ebf_bf.pdf › supplementary_materials/bf_output_dynamic/mmlu/model_wise_comparison_ebf_bf.pdf]

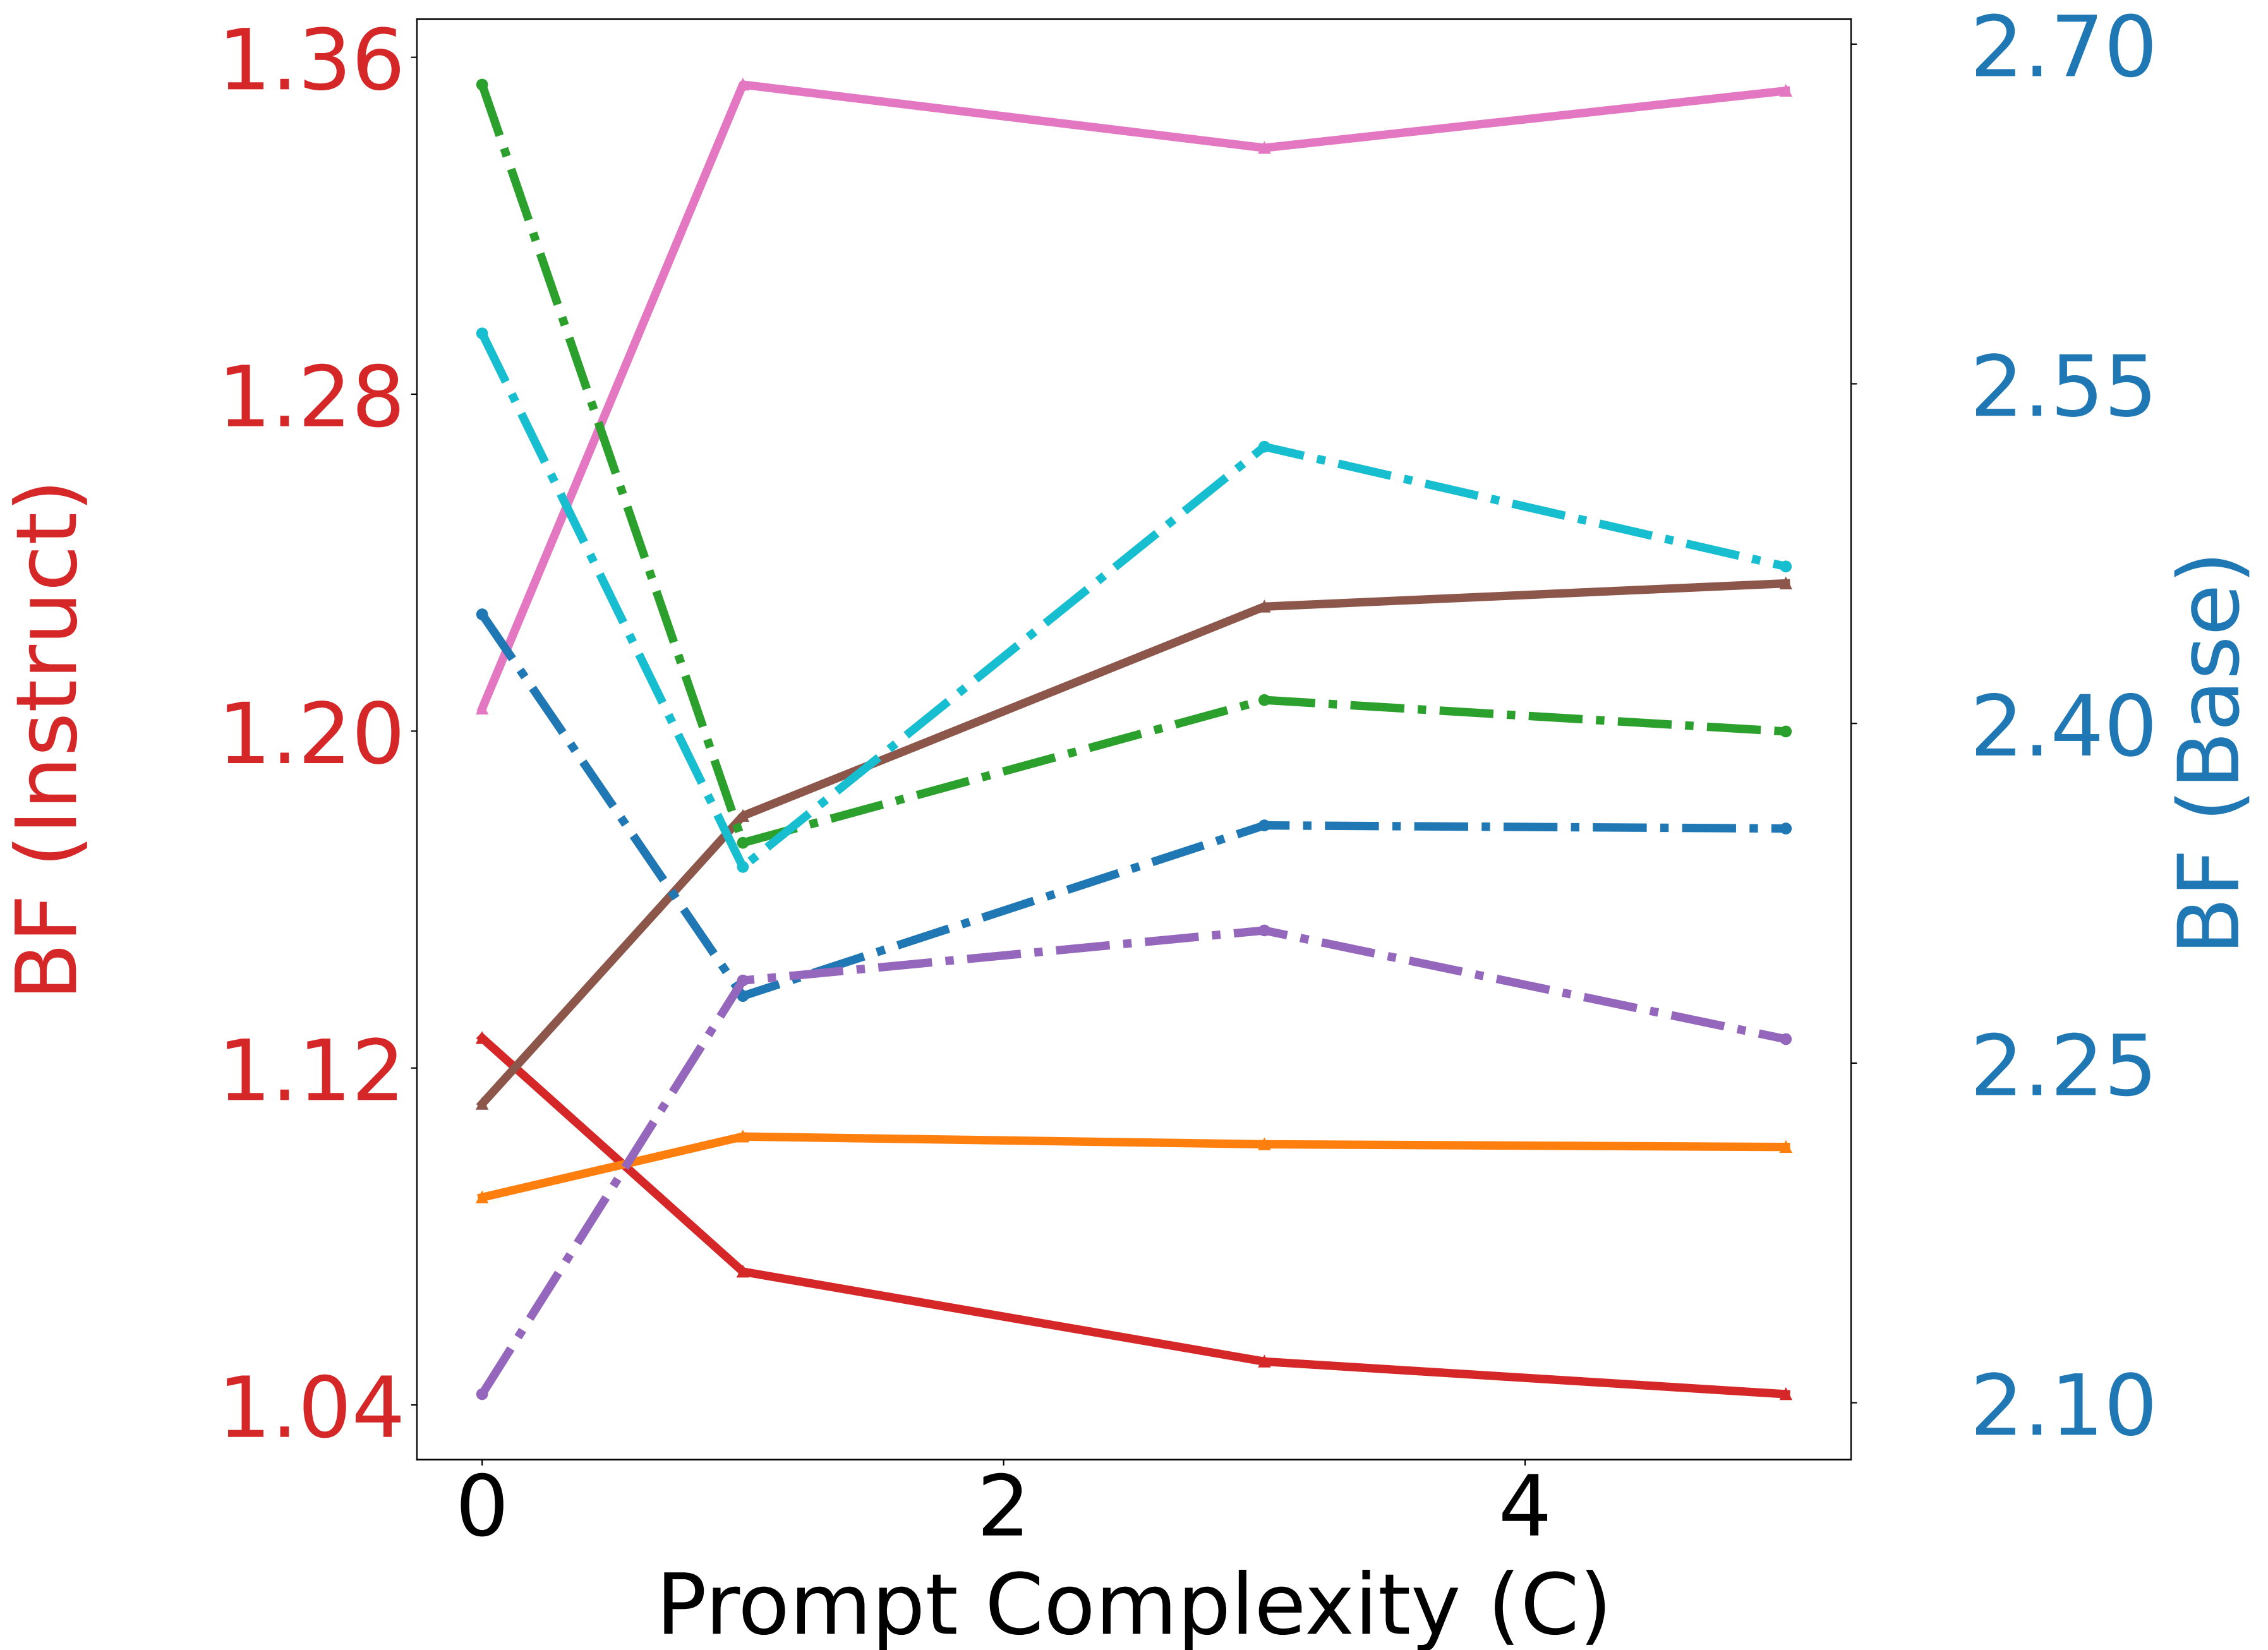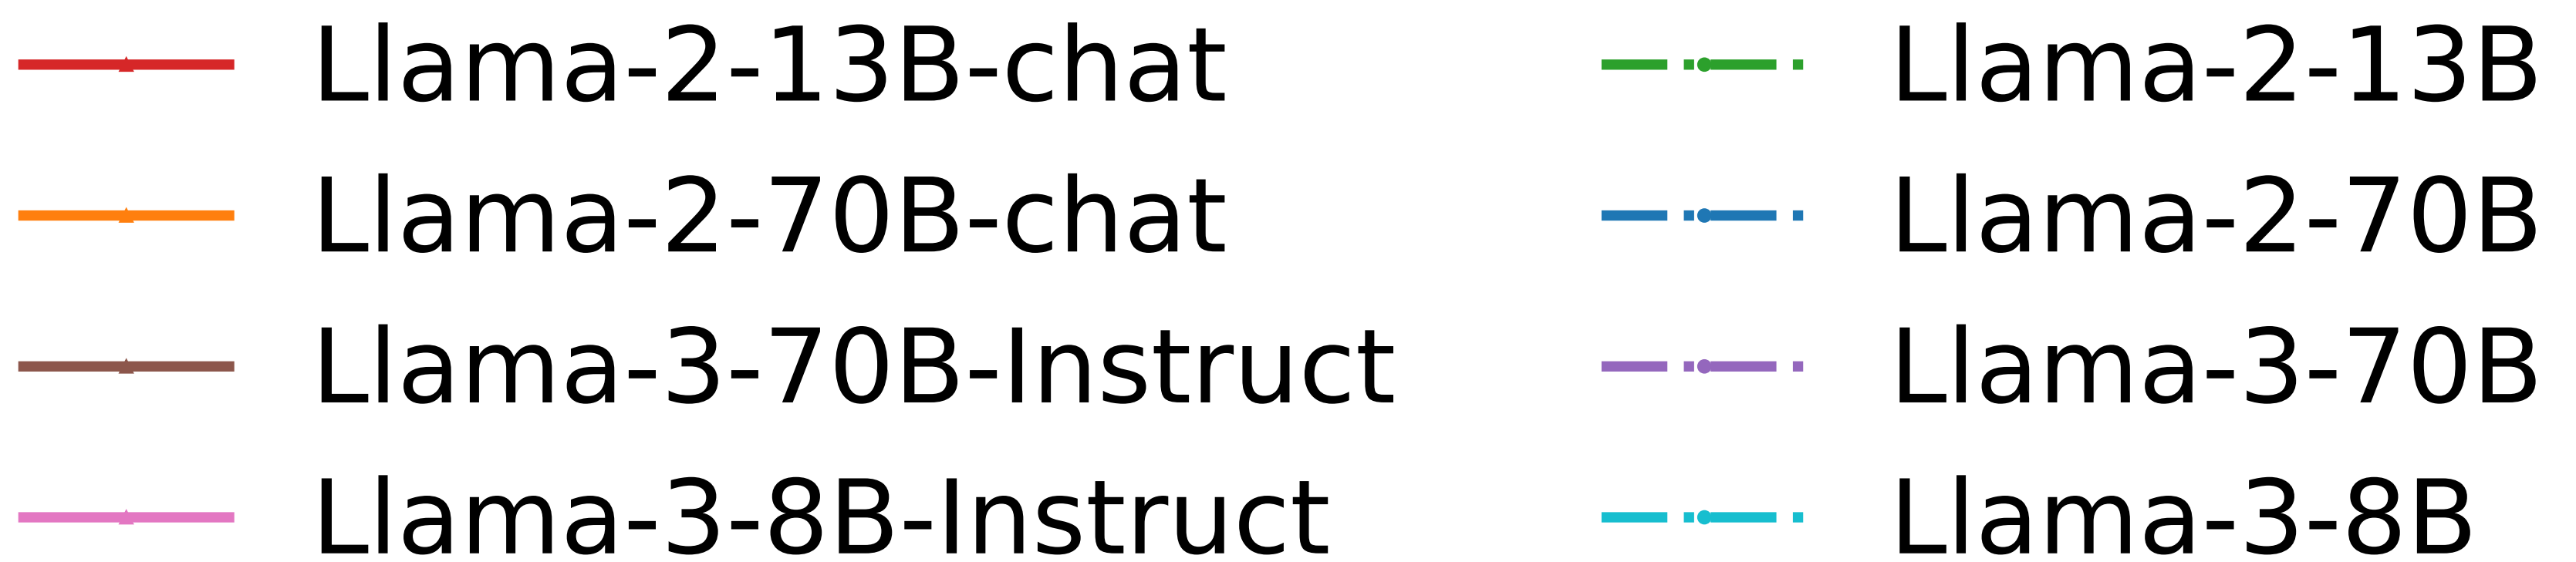

Supplement: supplementary_material [file model_wise_comparison_standard_ebf_bf.pdf › supplementary_materials/bf_output_dynamic/mmlu/model_wise_comparison_standard_ebf_bf.pdf]

# Llama-2-13B-chat

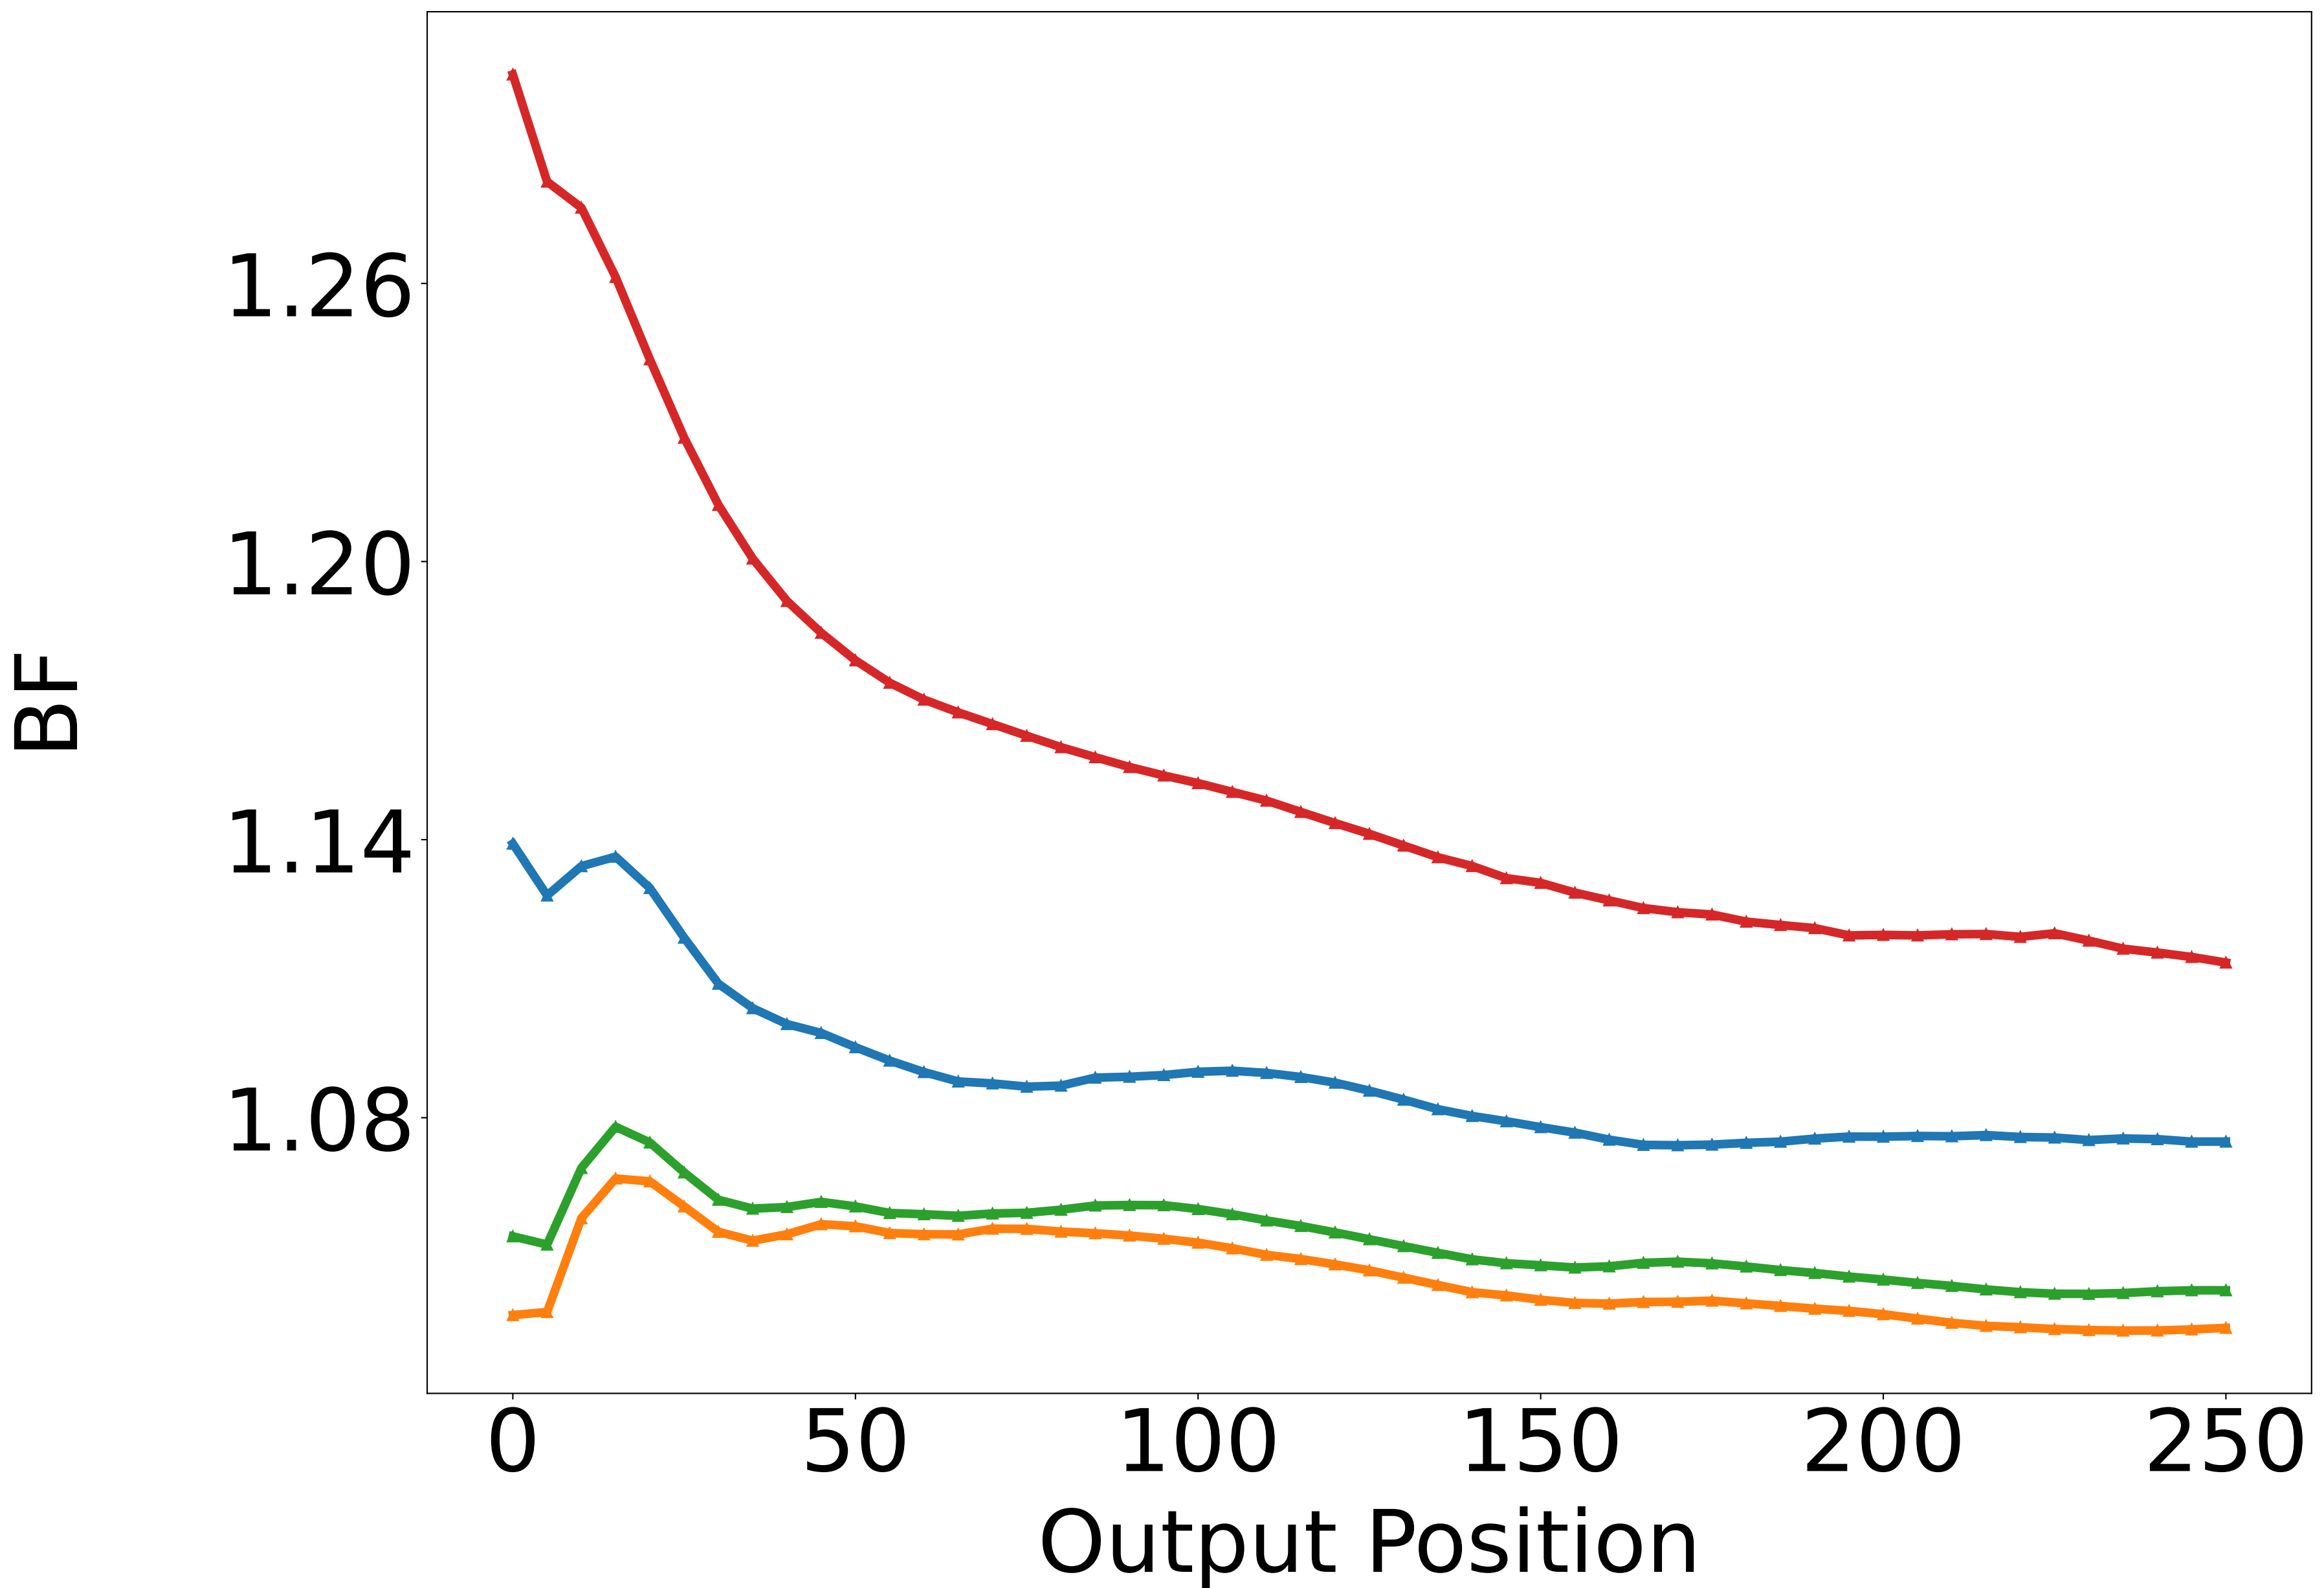

Prompt Complexity (C)

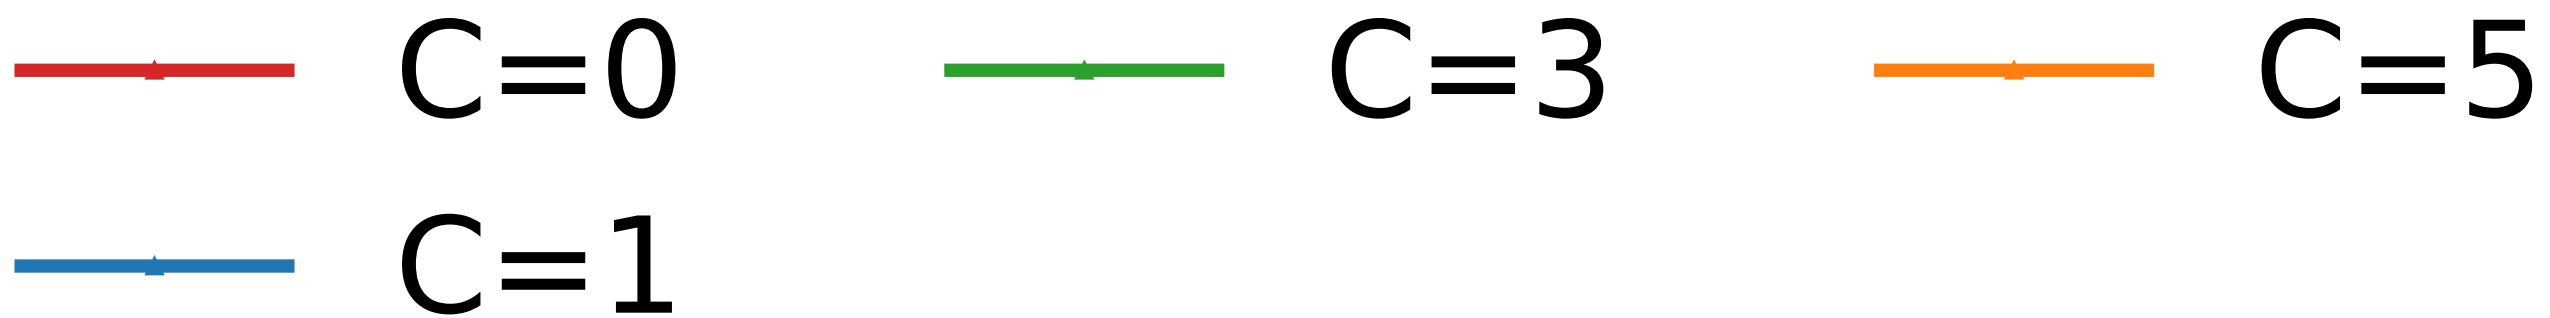

Supplement: supplementary_material [file piecewise_ebf_Llama-2-13B-chat_bf.pdf › supplementary_materials/bf_output_dynamic/mmlu/piecewise_ebf_Llama-2-13B-chat_bf.pdf]

# Llama-2-13B-chat

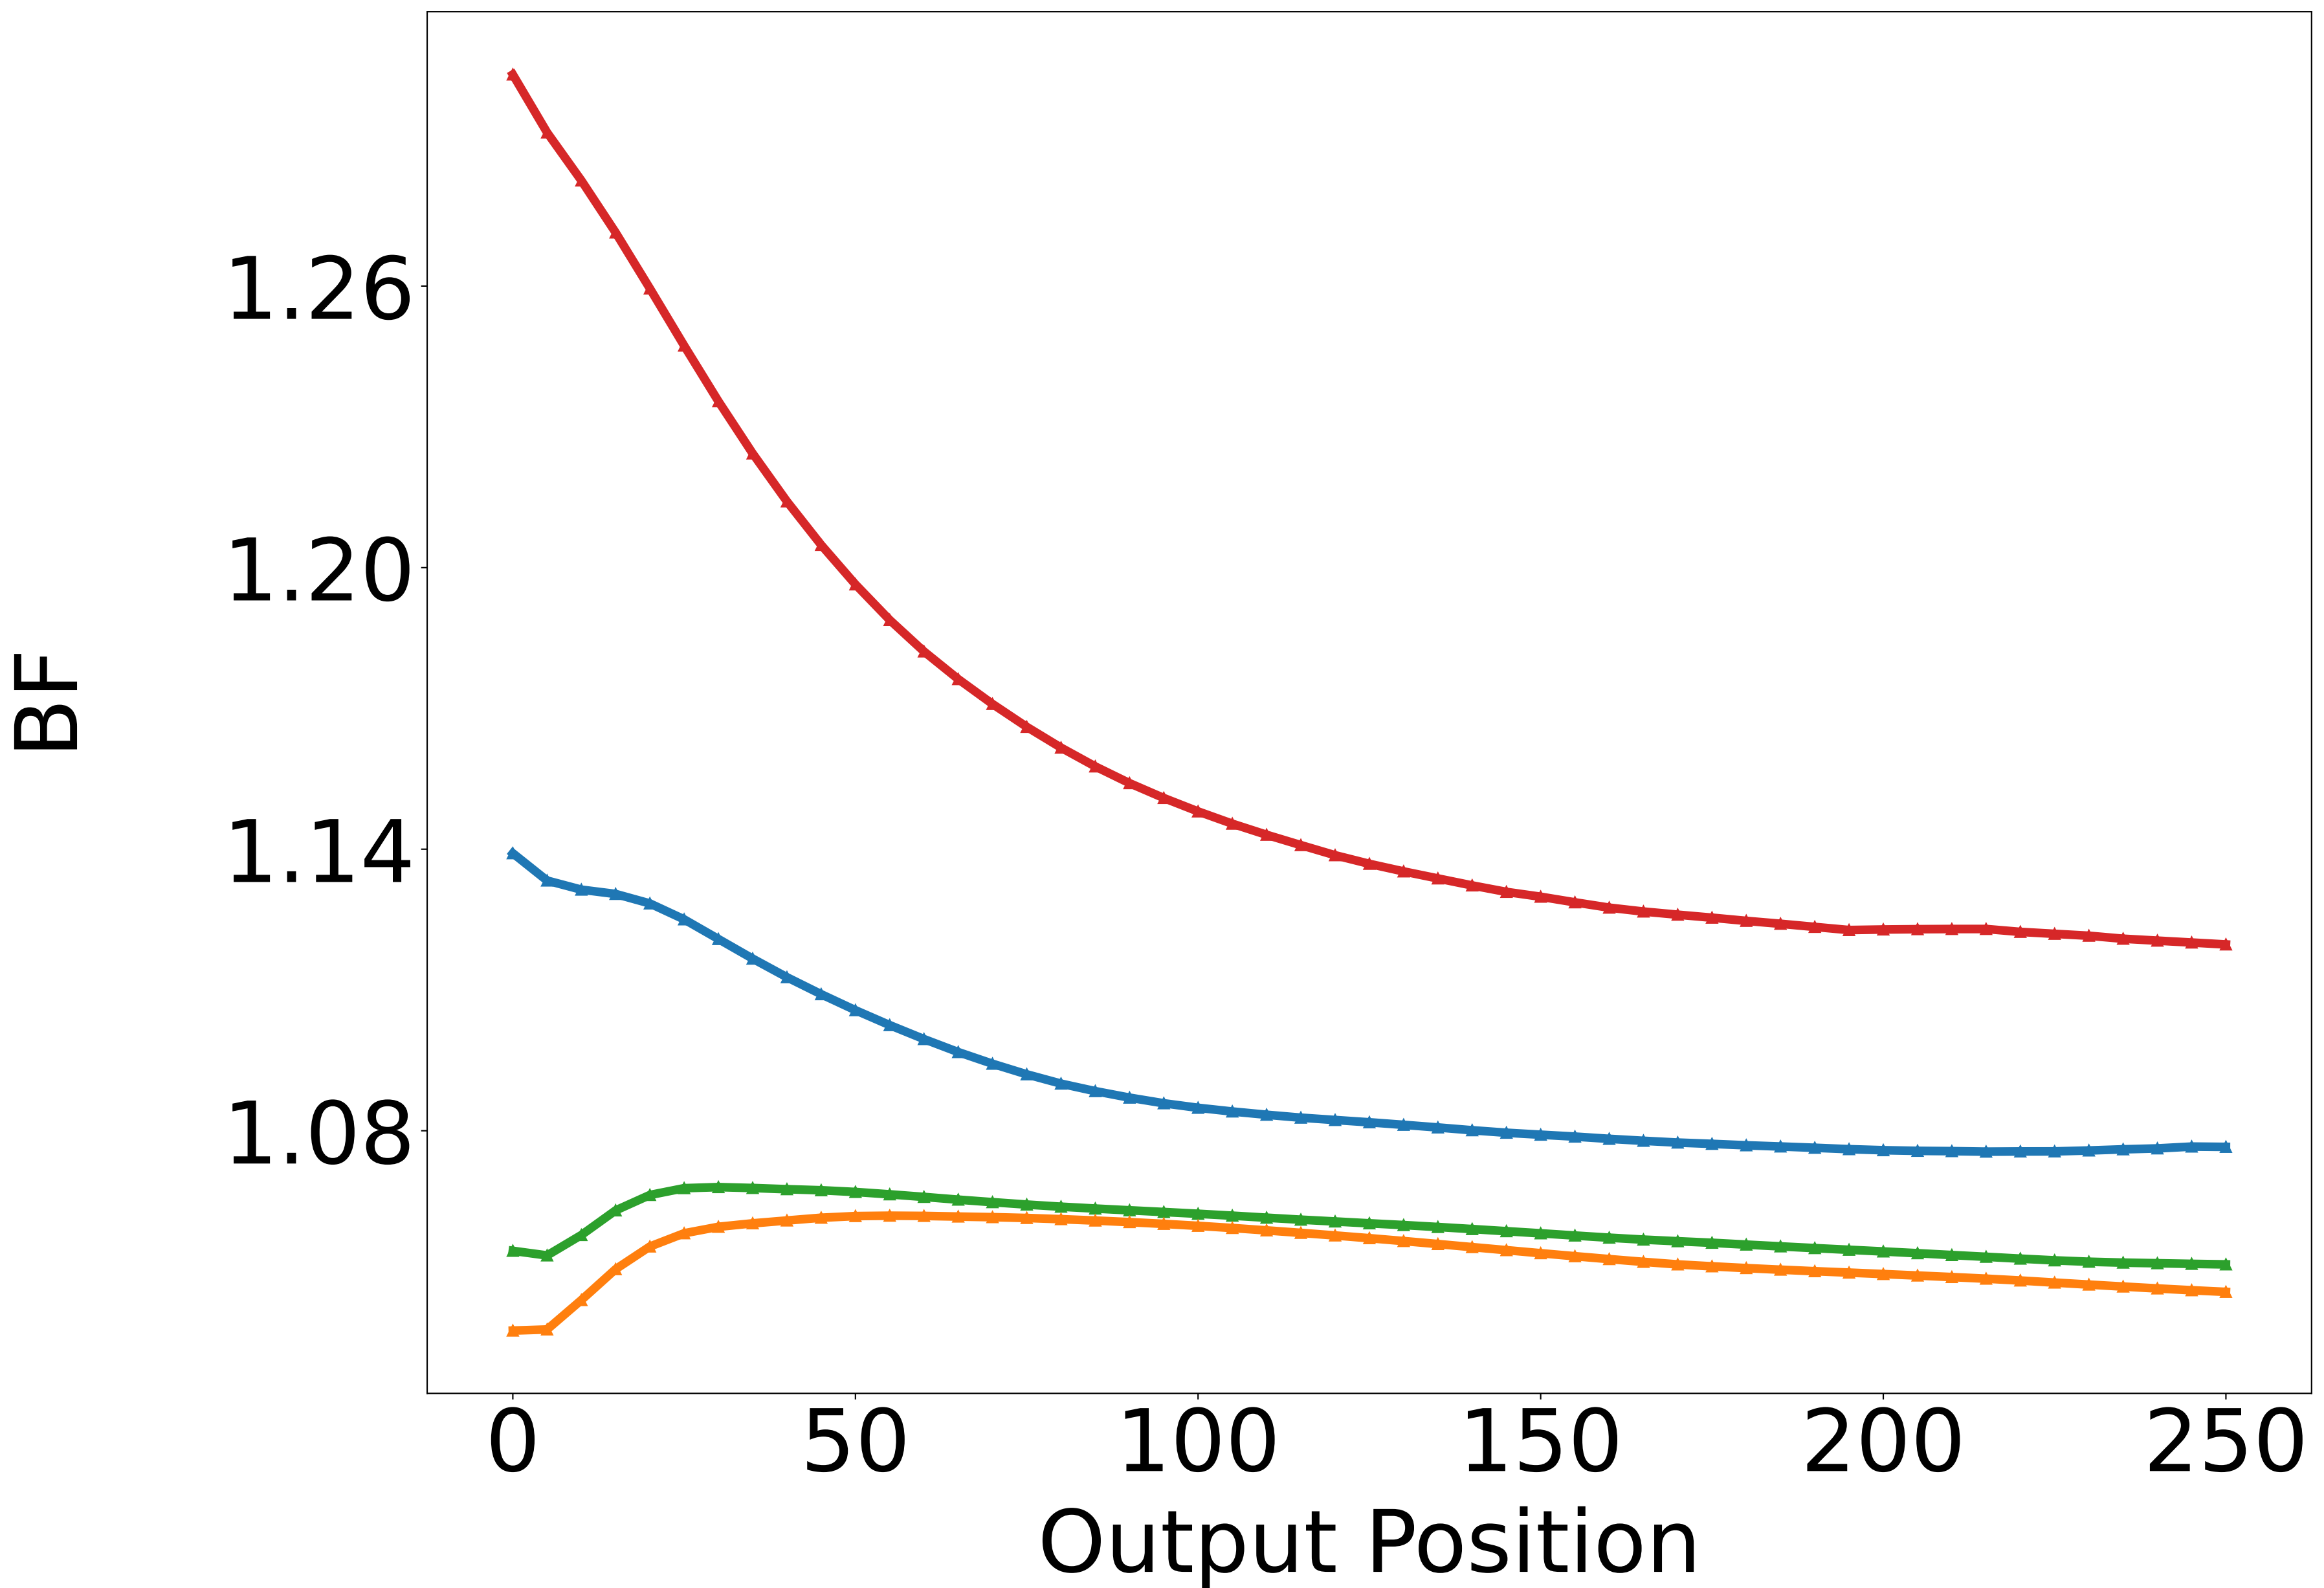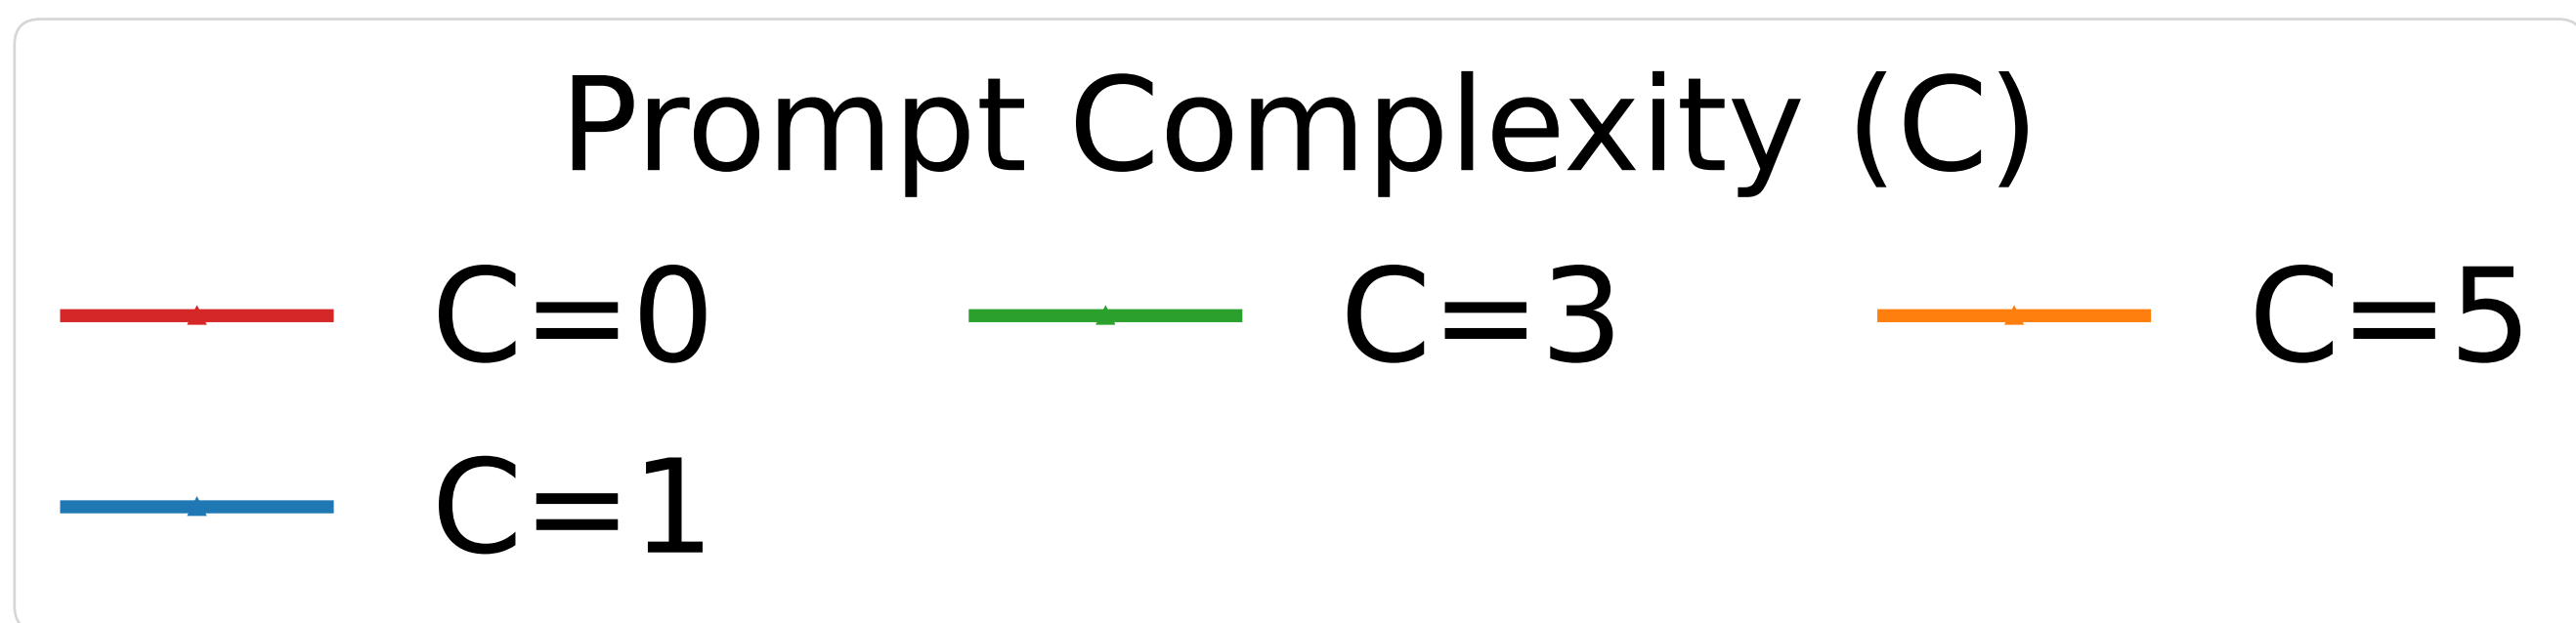

Supplement: supplementary_material [file piecewise_ebf_Llama-2-13B-chat_bf_fixed_start.pdf › supplementary_materials/bf_output_dynamic/mmlu/piecewise_ebf_Llama-2-13B-chat_bf_fixed_start.pdf]

# Llama-2-13B

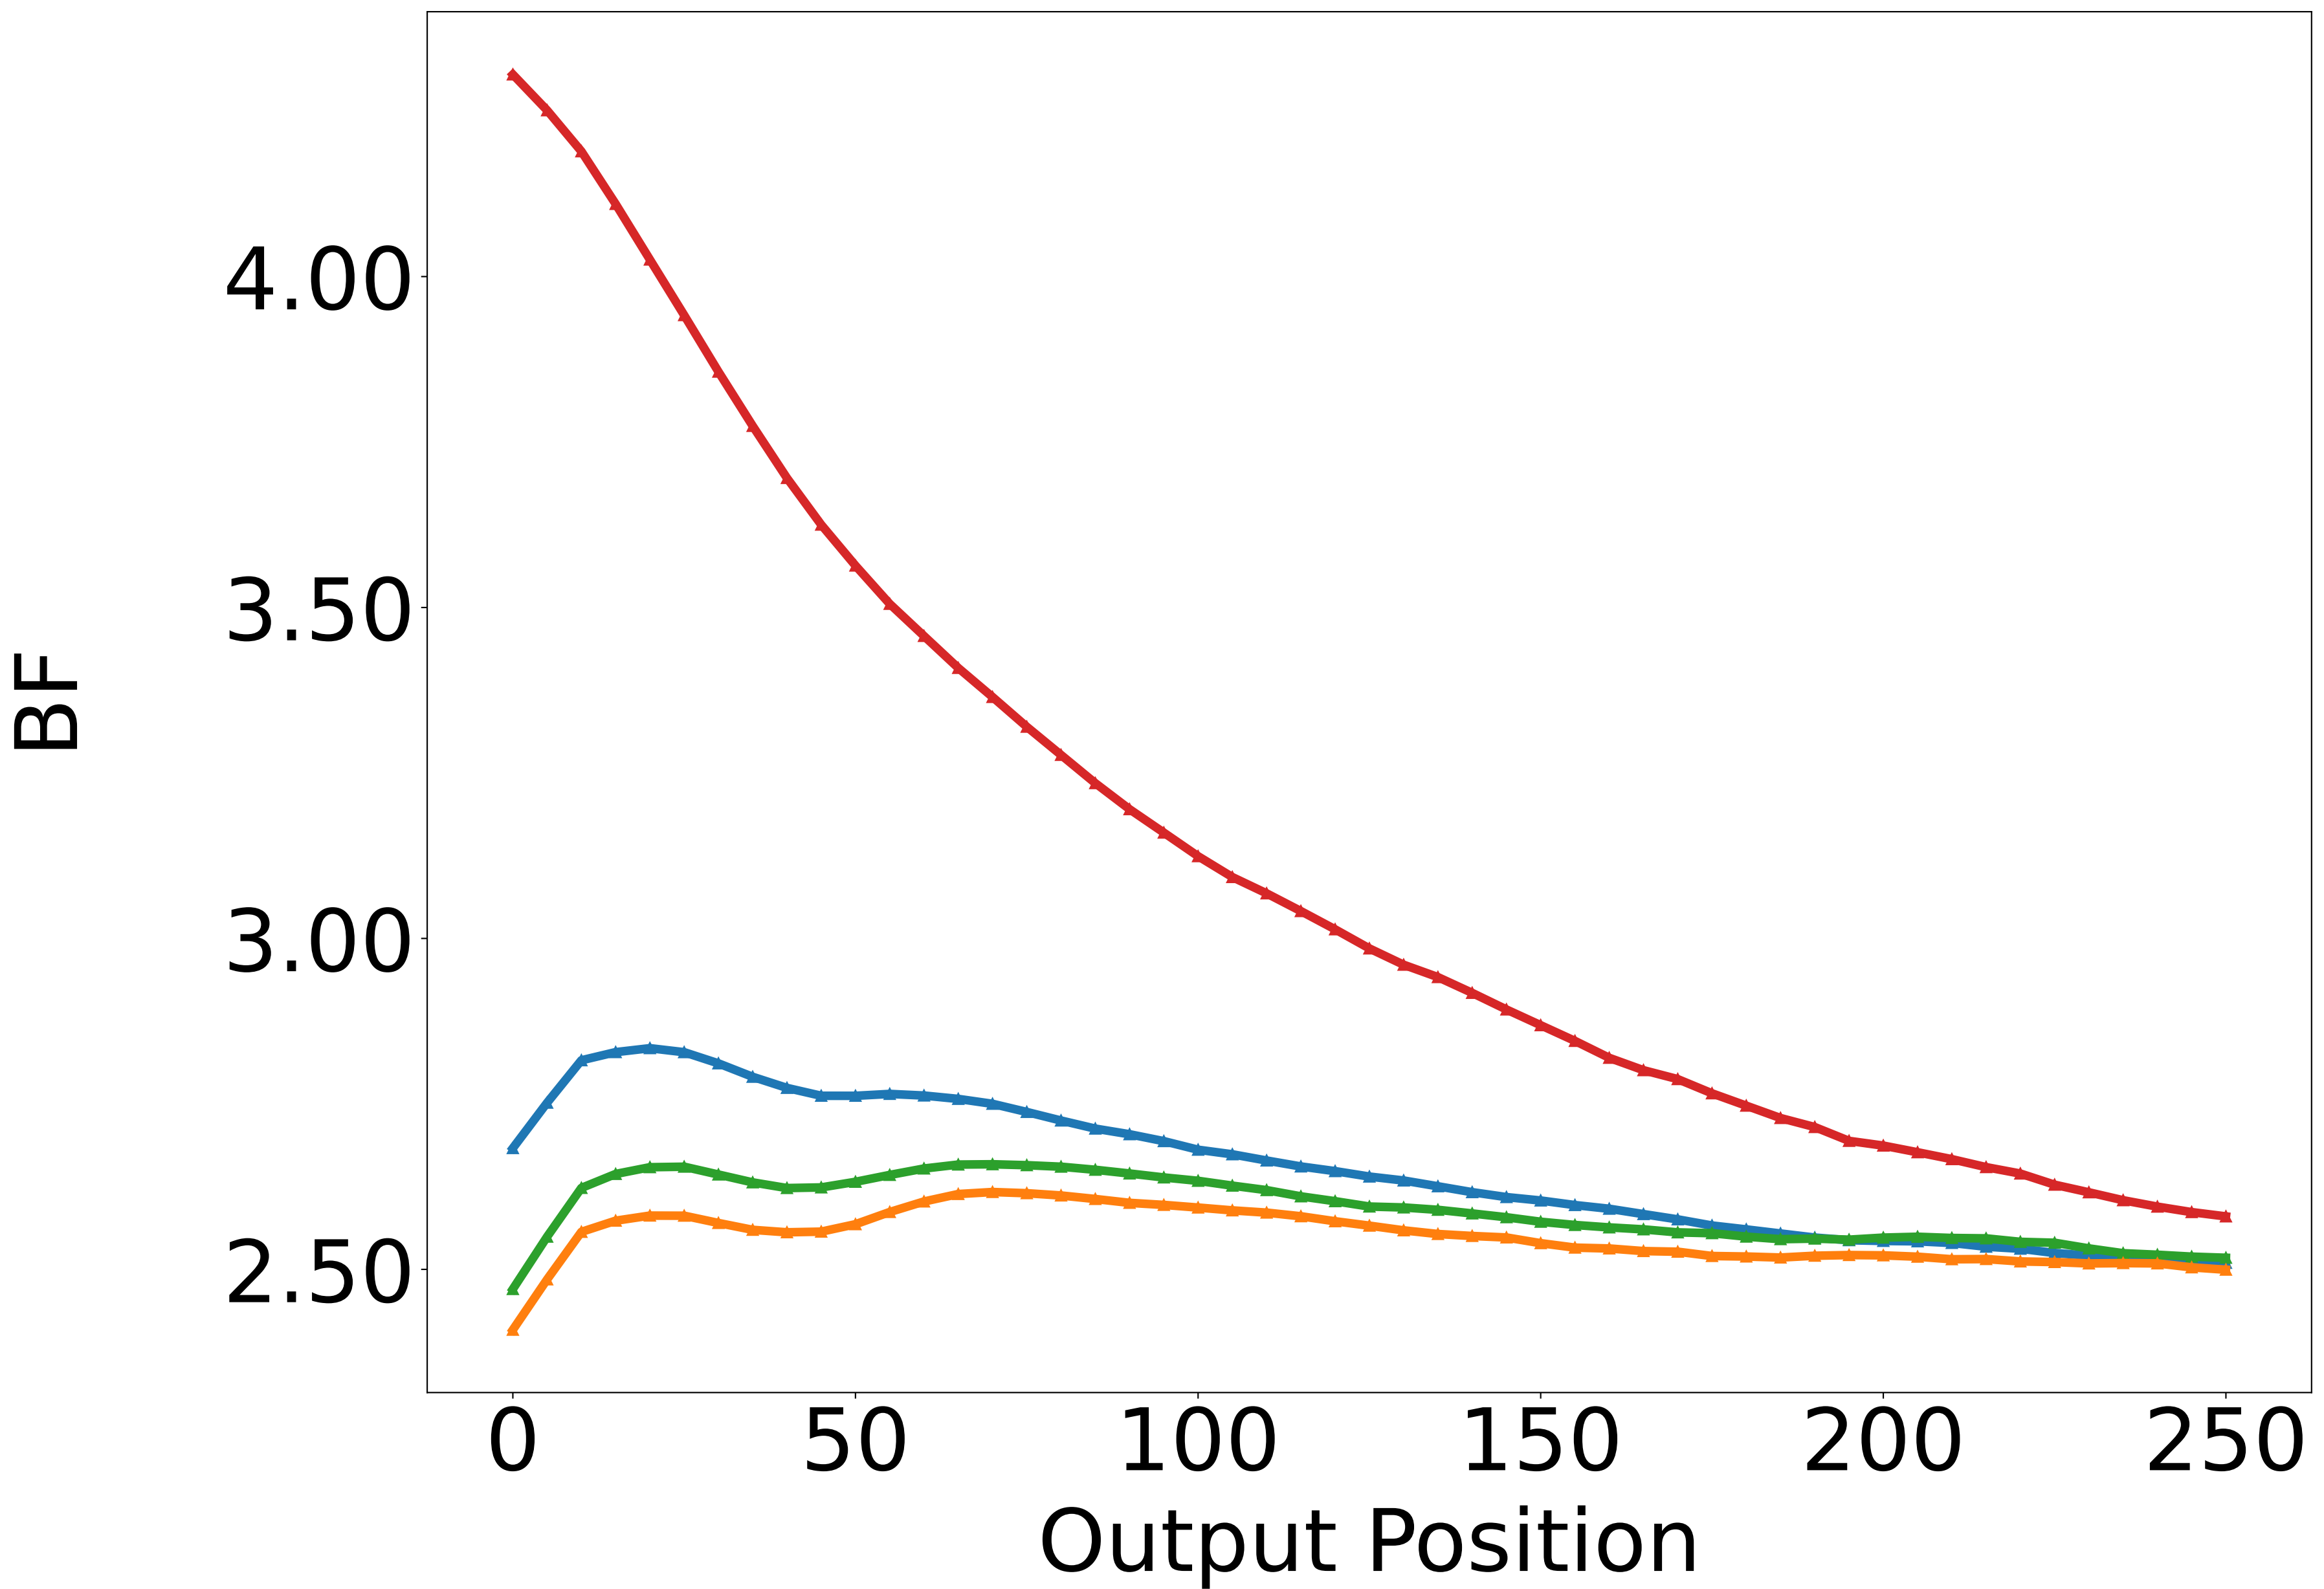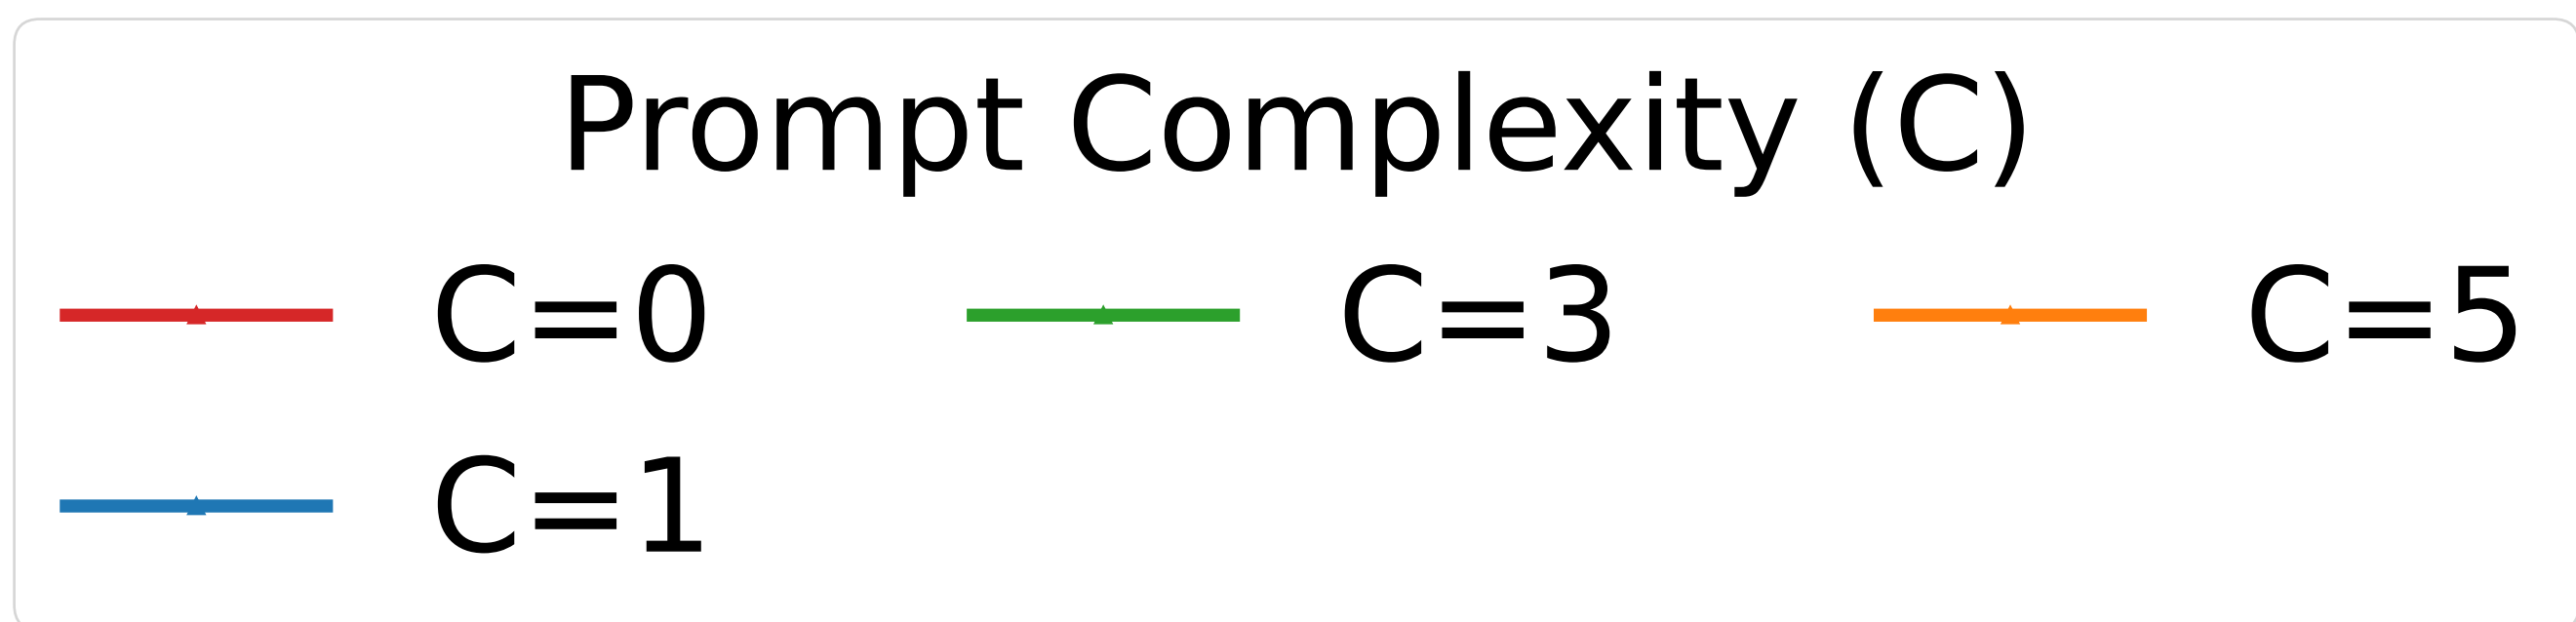

Supplement: supplementary_material [file piecewise_ebf_Llama-2-13B_bf.pdf › supplementary_materials/bf_output_dynamic/mmlu/piecewise_ebf_Llama-2-13B_bf.pdf]

# Llama-2-13B

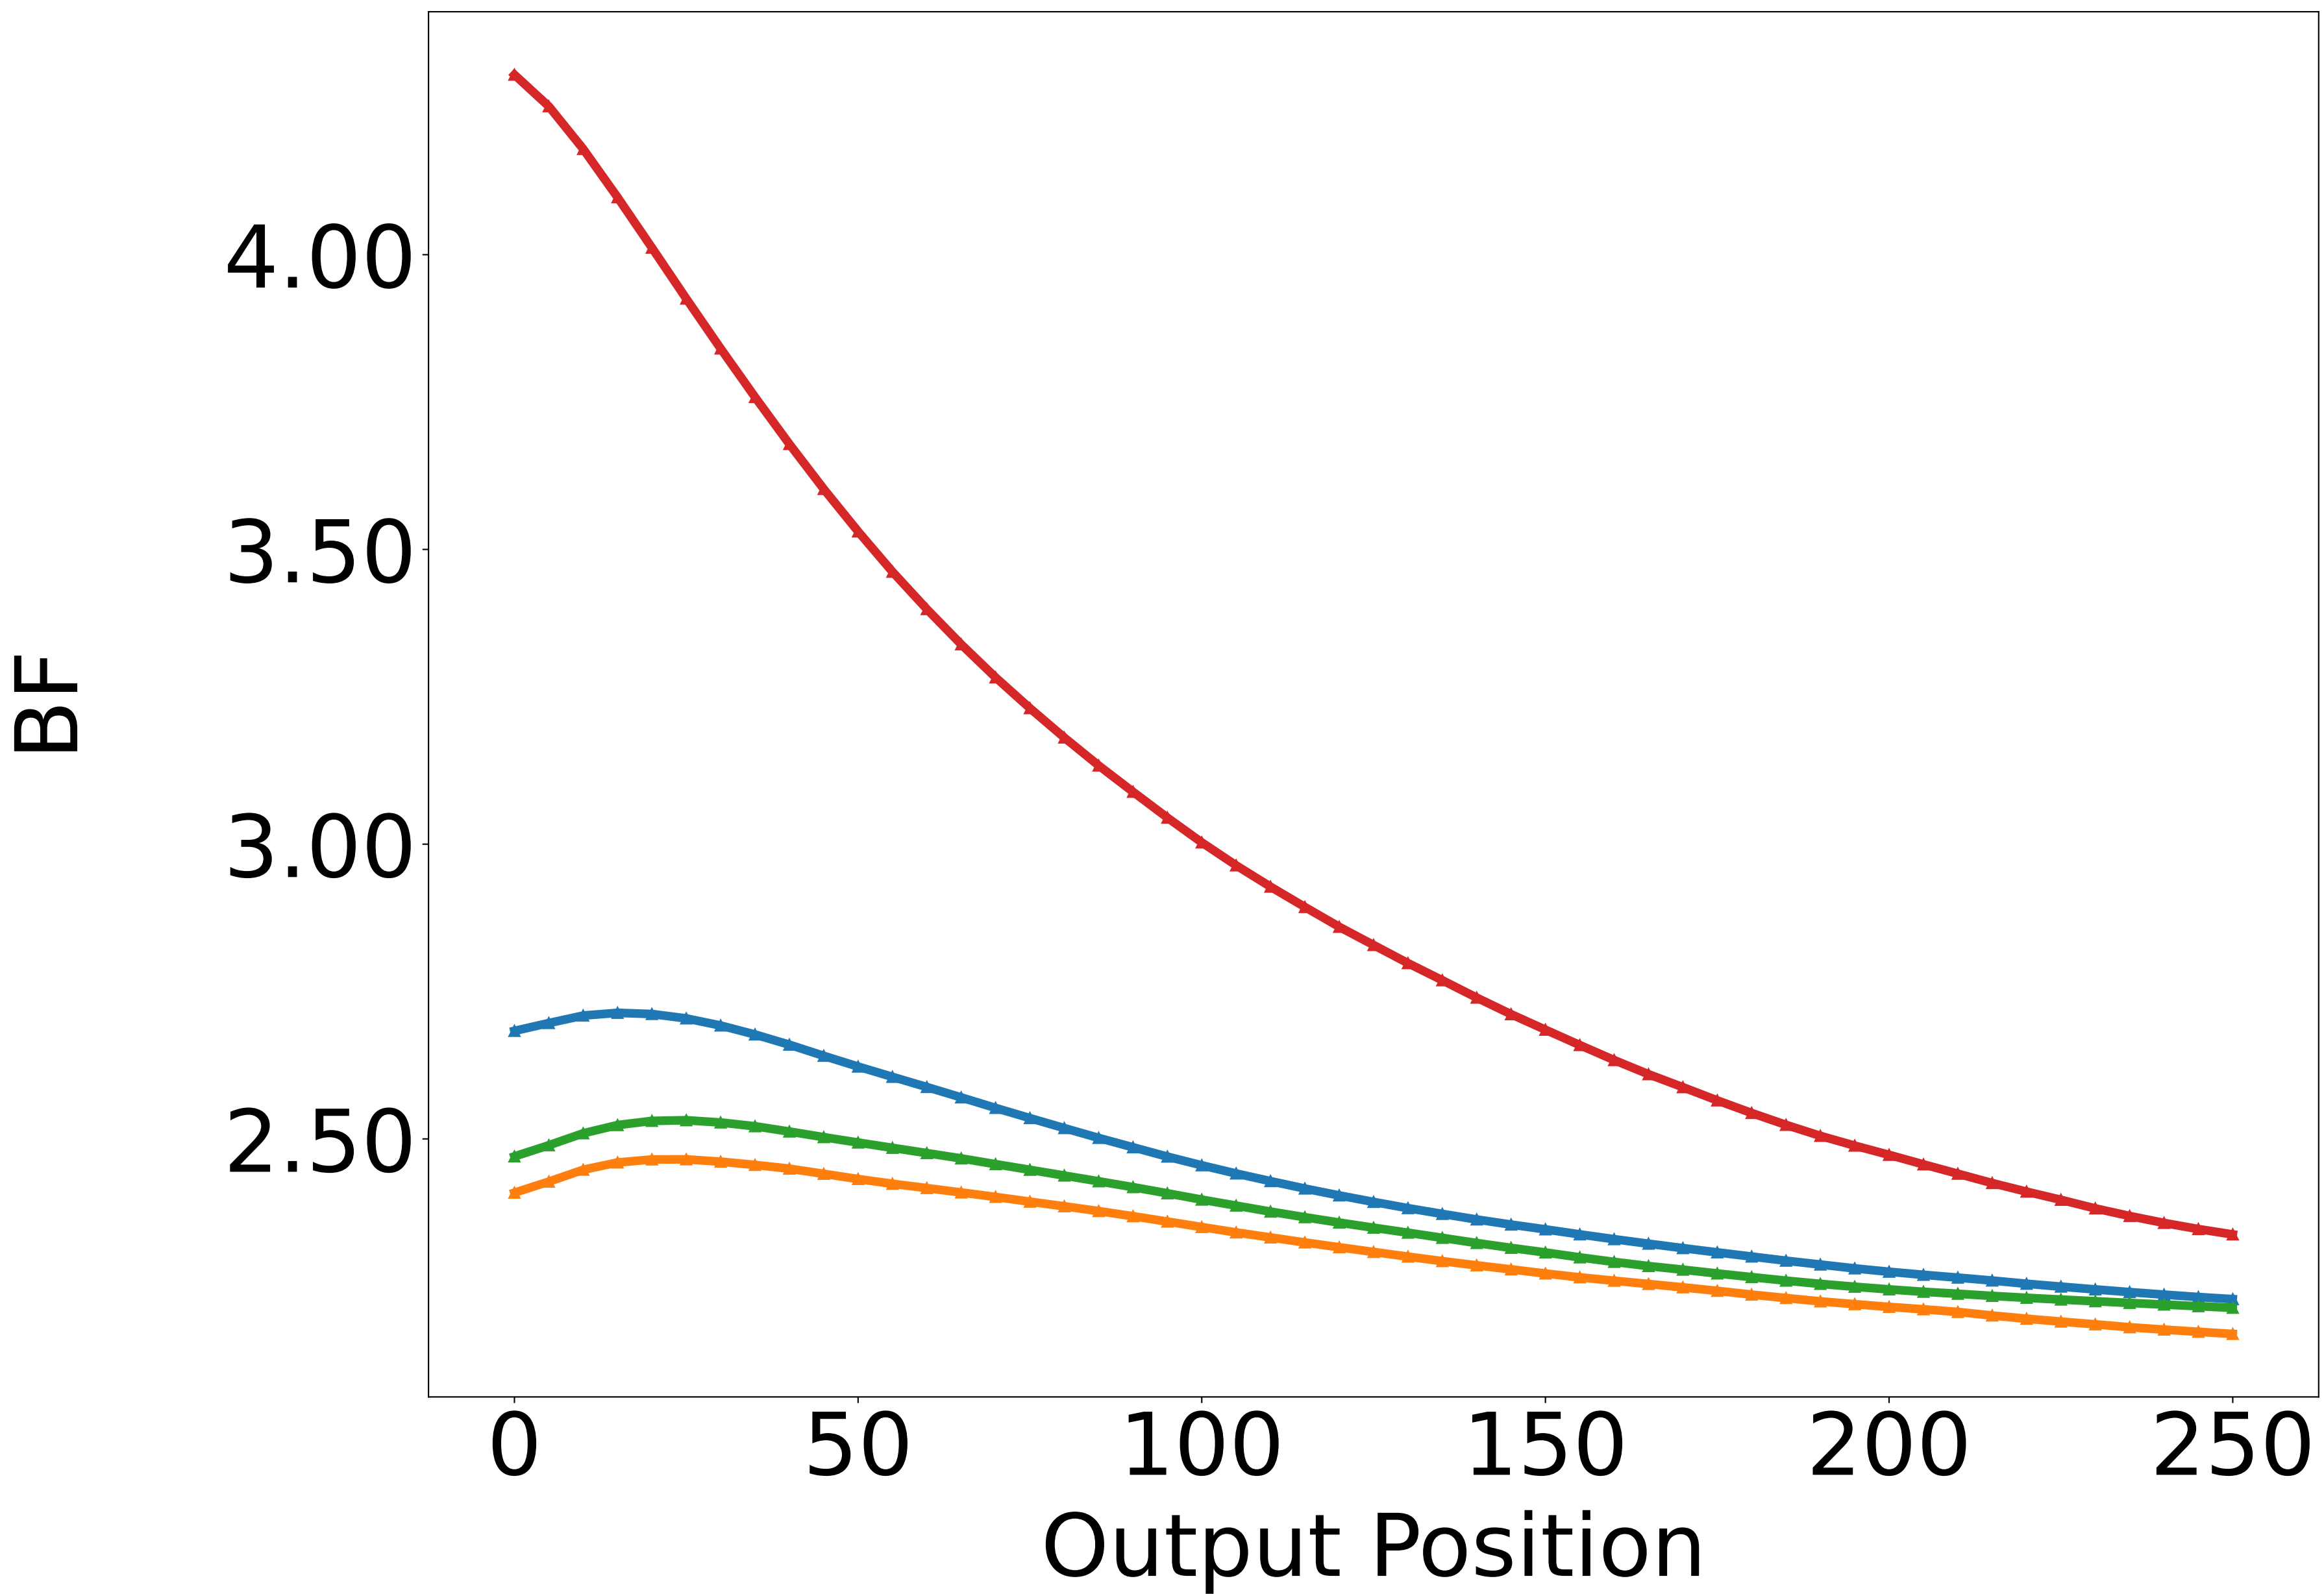

Supplement: supplementary_material [file piecewise_ebf_Llama-2-13B_bf_fixed_start.pdf › supplementary_materials/bf_output_dynamic/mmlu/piecewise_ebf_Llama-2-13B_bf_fixed_start.pdf]

# Llama-2-70B-chat

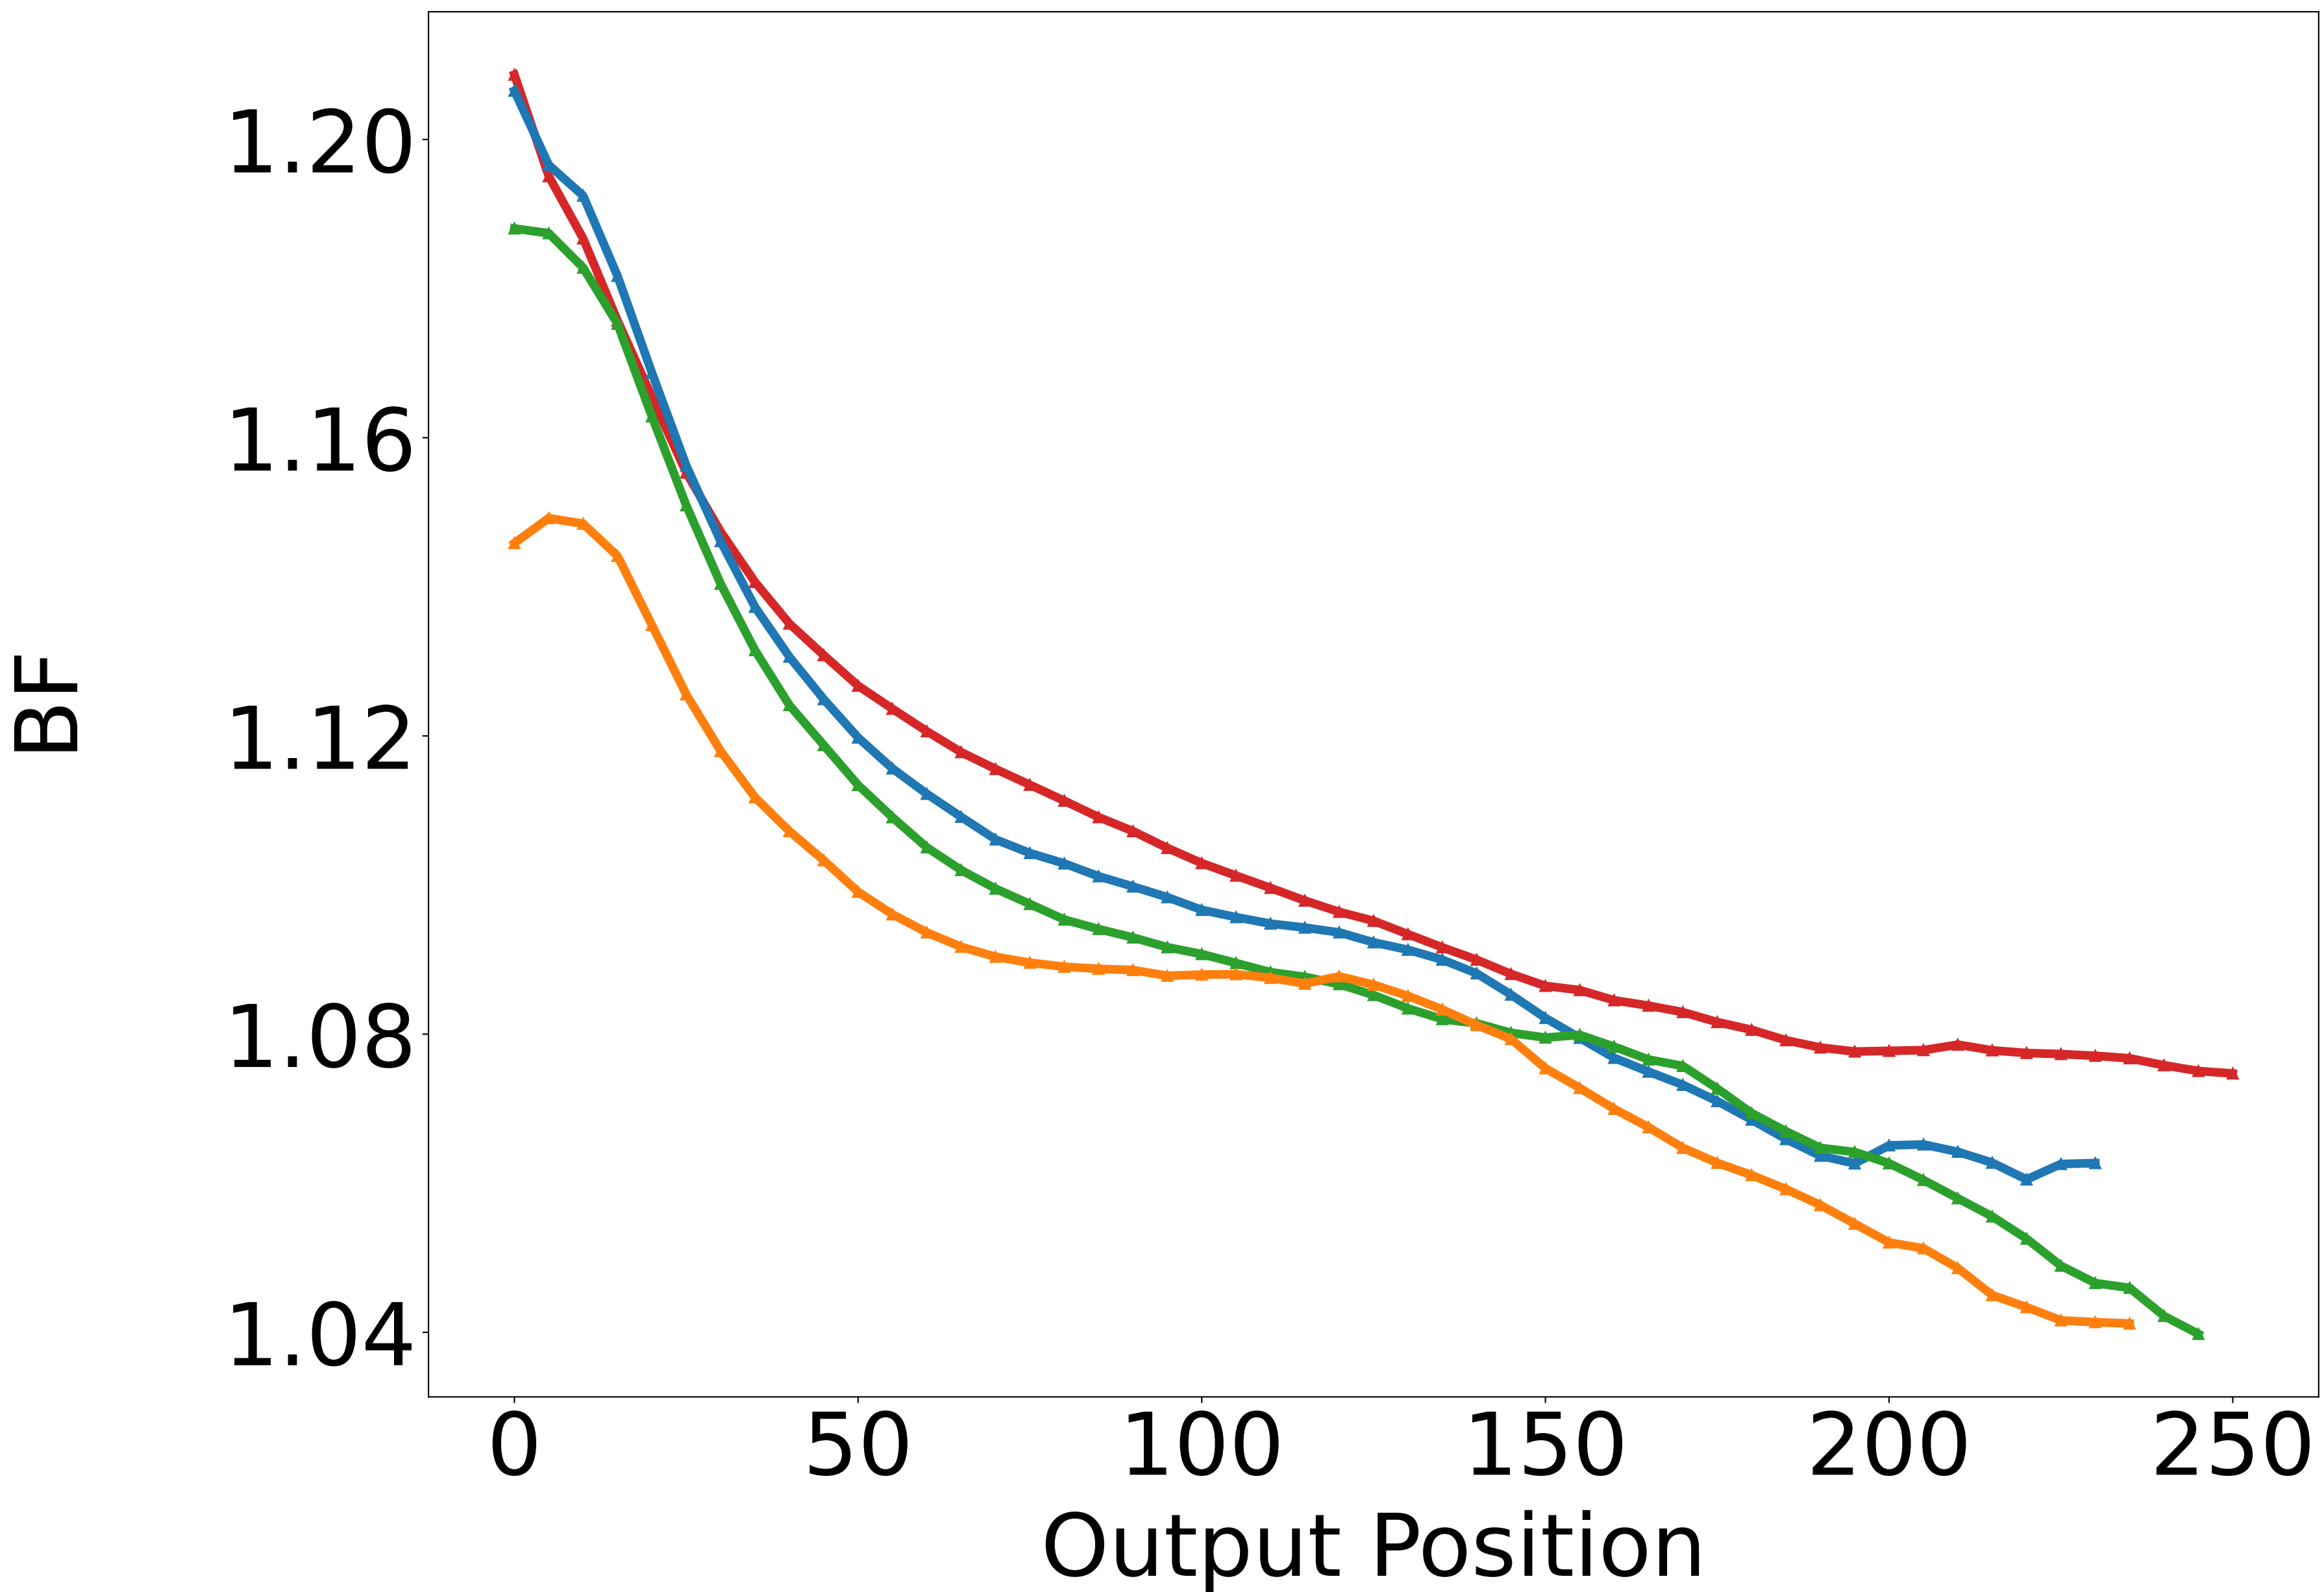

Prompt Complexity (C)



Supplement: supplementary_material [file piecewise_ebf_Llama-2-70B-chat_bf.pdf › supplementary_materials/bf_output_dynamic/mmlu/piecewise_ebf_Llama-2-70B-chat_bf.pdf]

# Llama-2-70B-chat

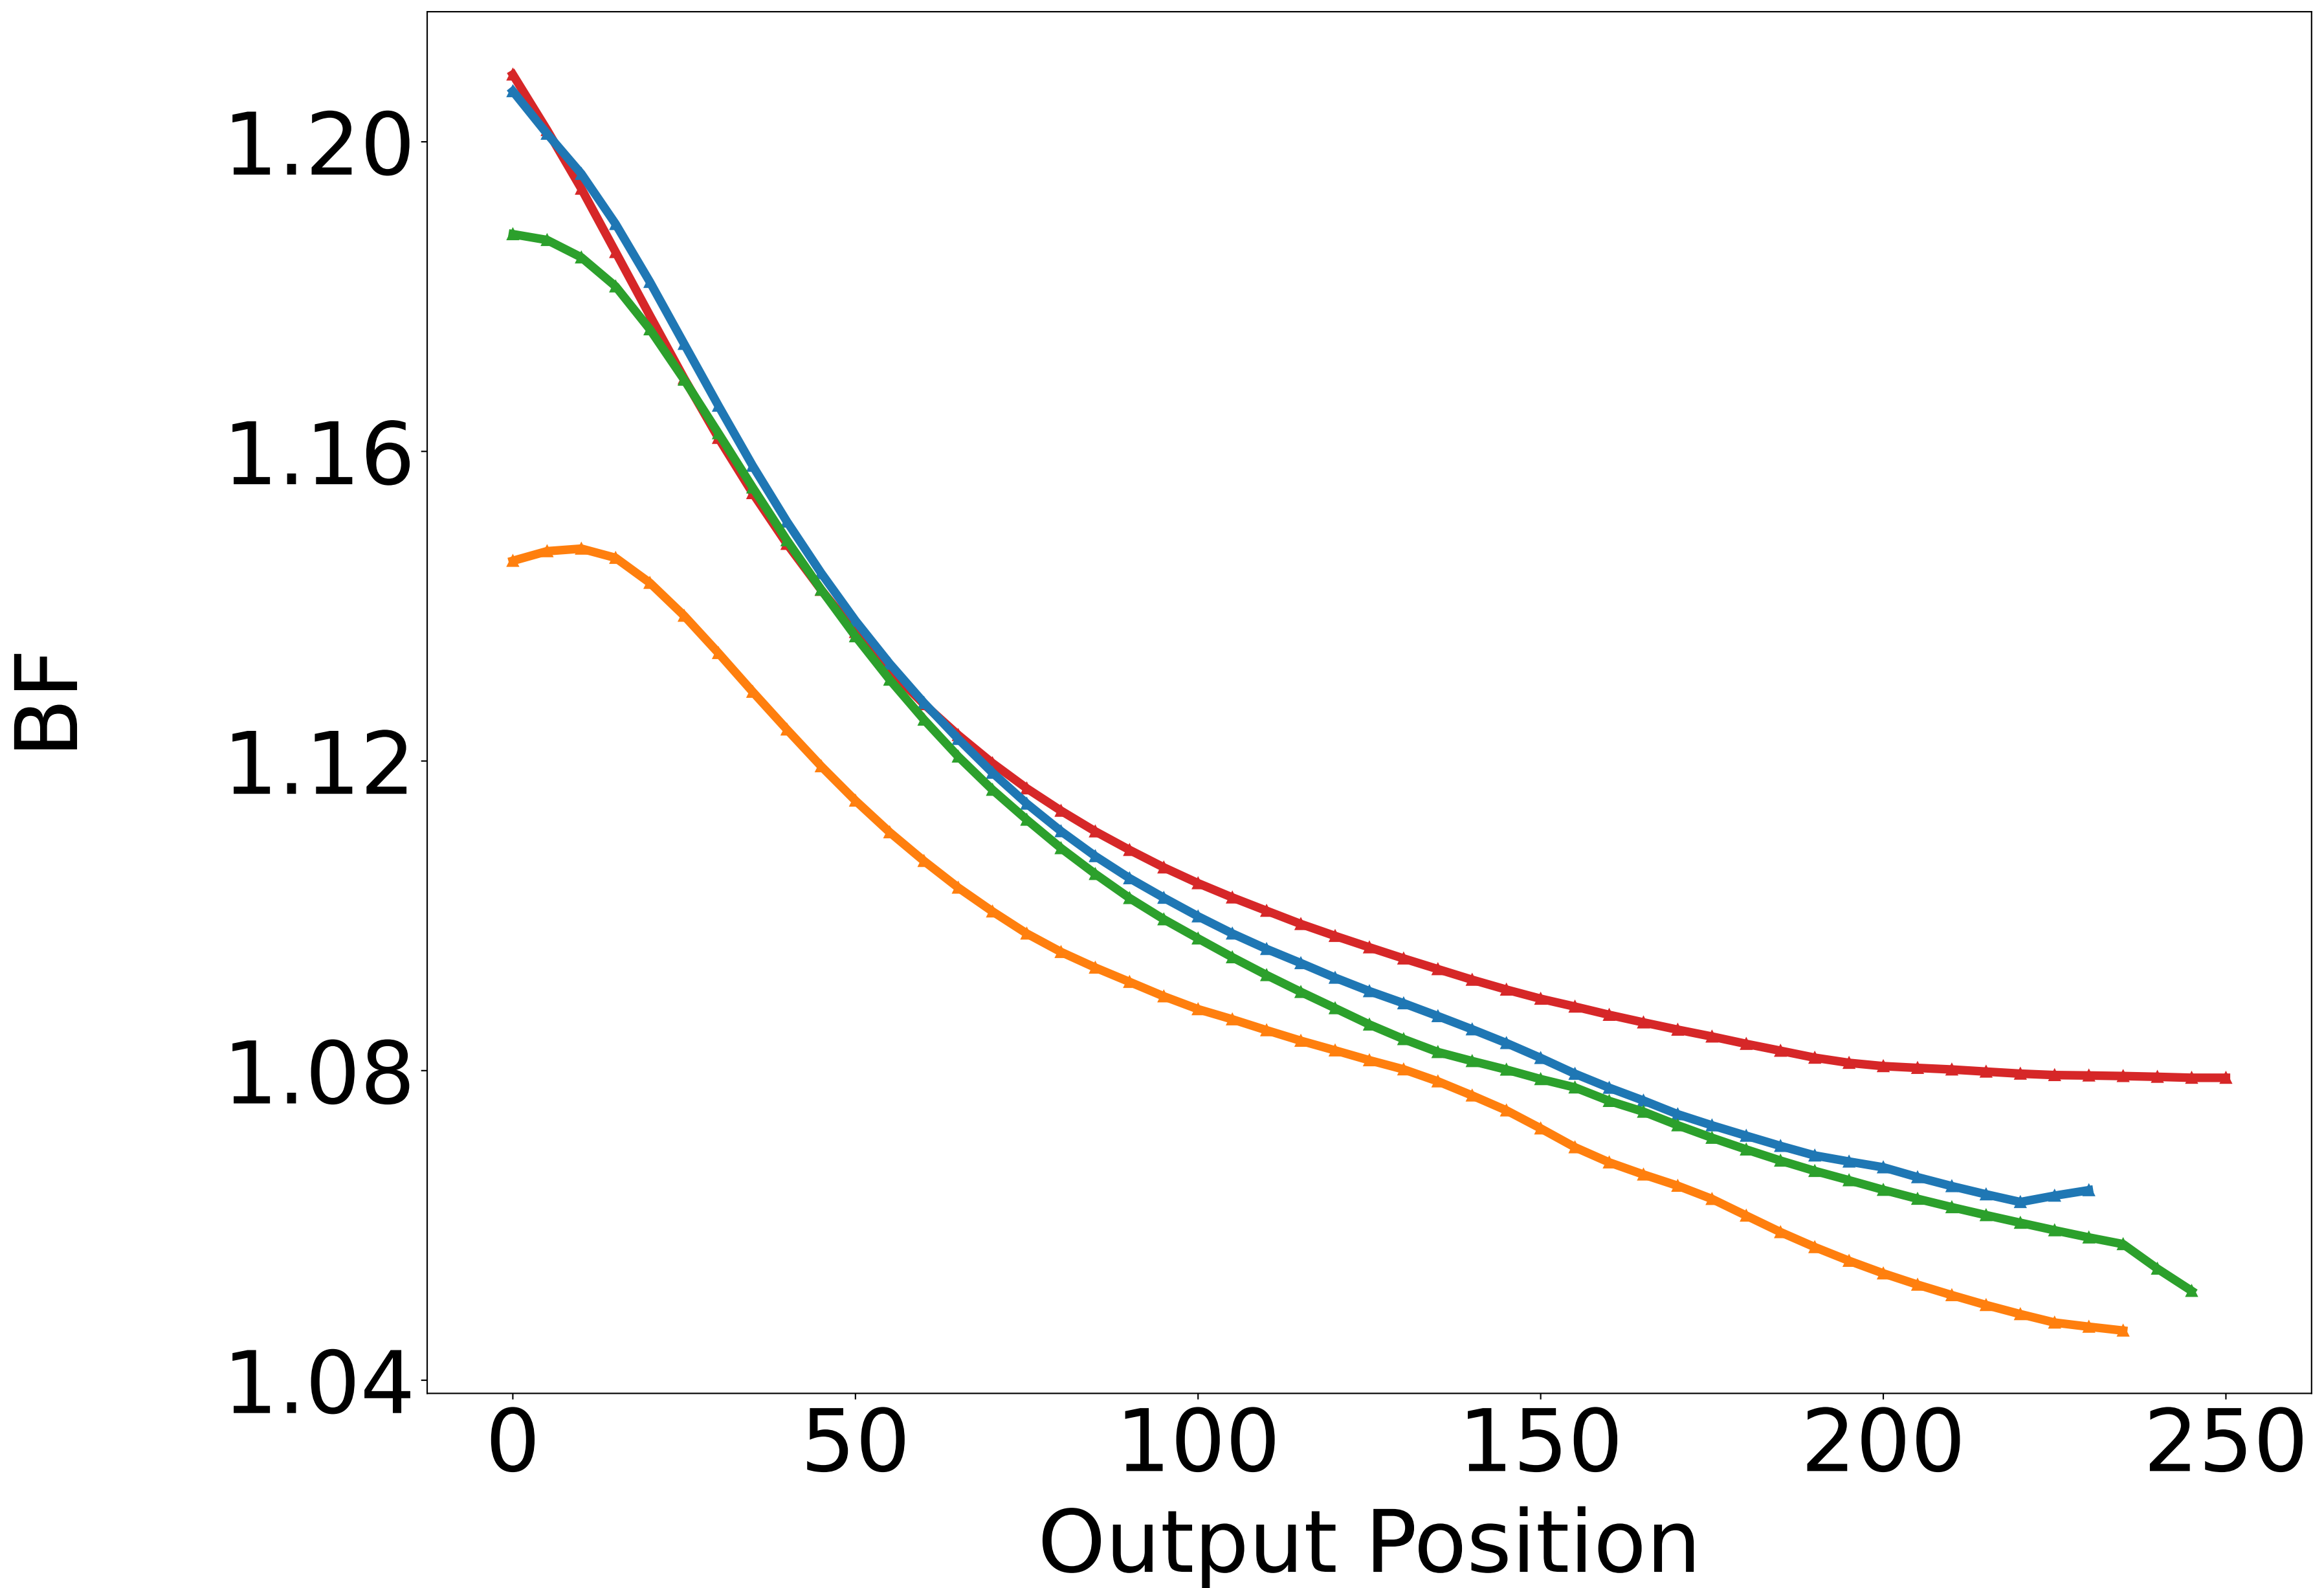

Prompt Complexity (C)



Supplement: supplementary_material [file piecewise_ebf_Llama-2-70B-chat_bf_fixed_start.pdf › supplementary_materials/bf_output_dynamic/mmlu/piecewise_ebf_Llama-2-70B-chat_bf_fixed_start.pdf]

# Llama-2-70B

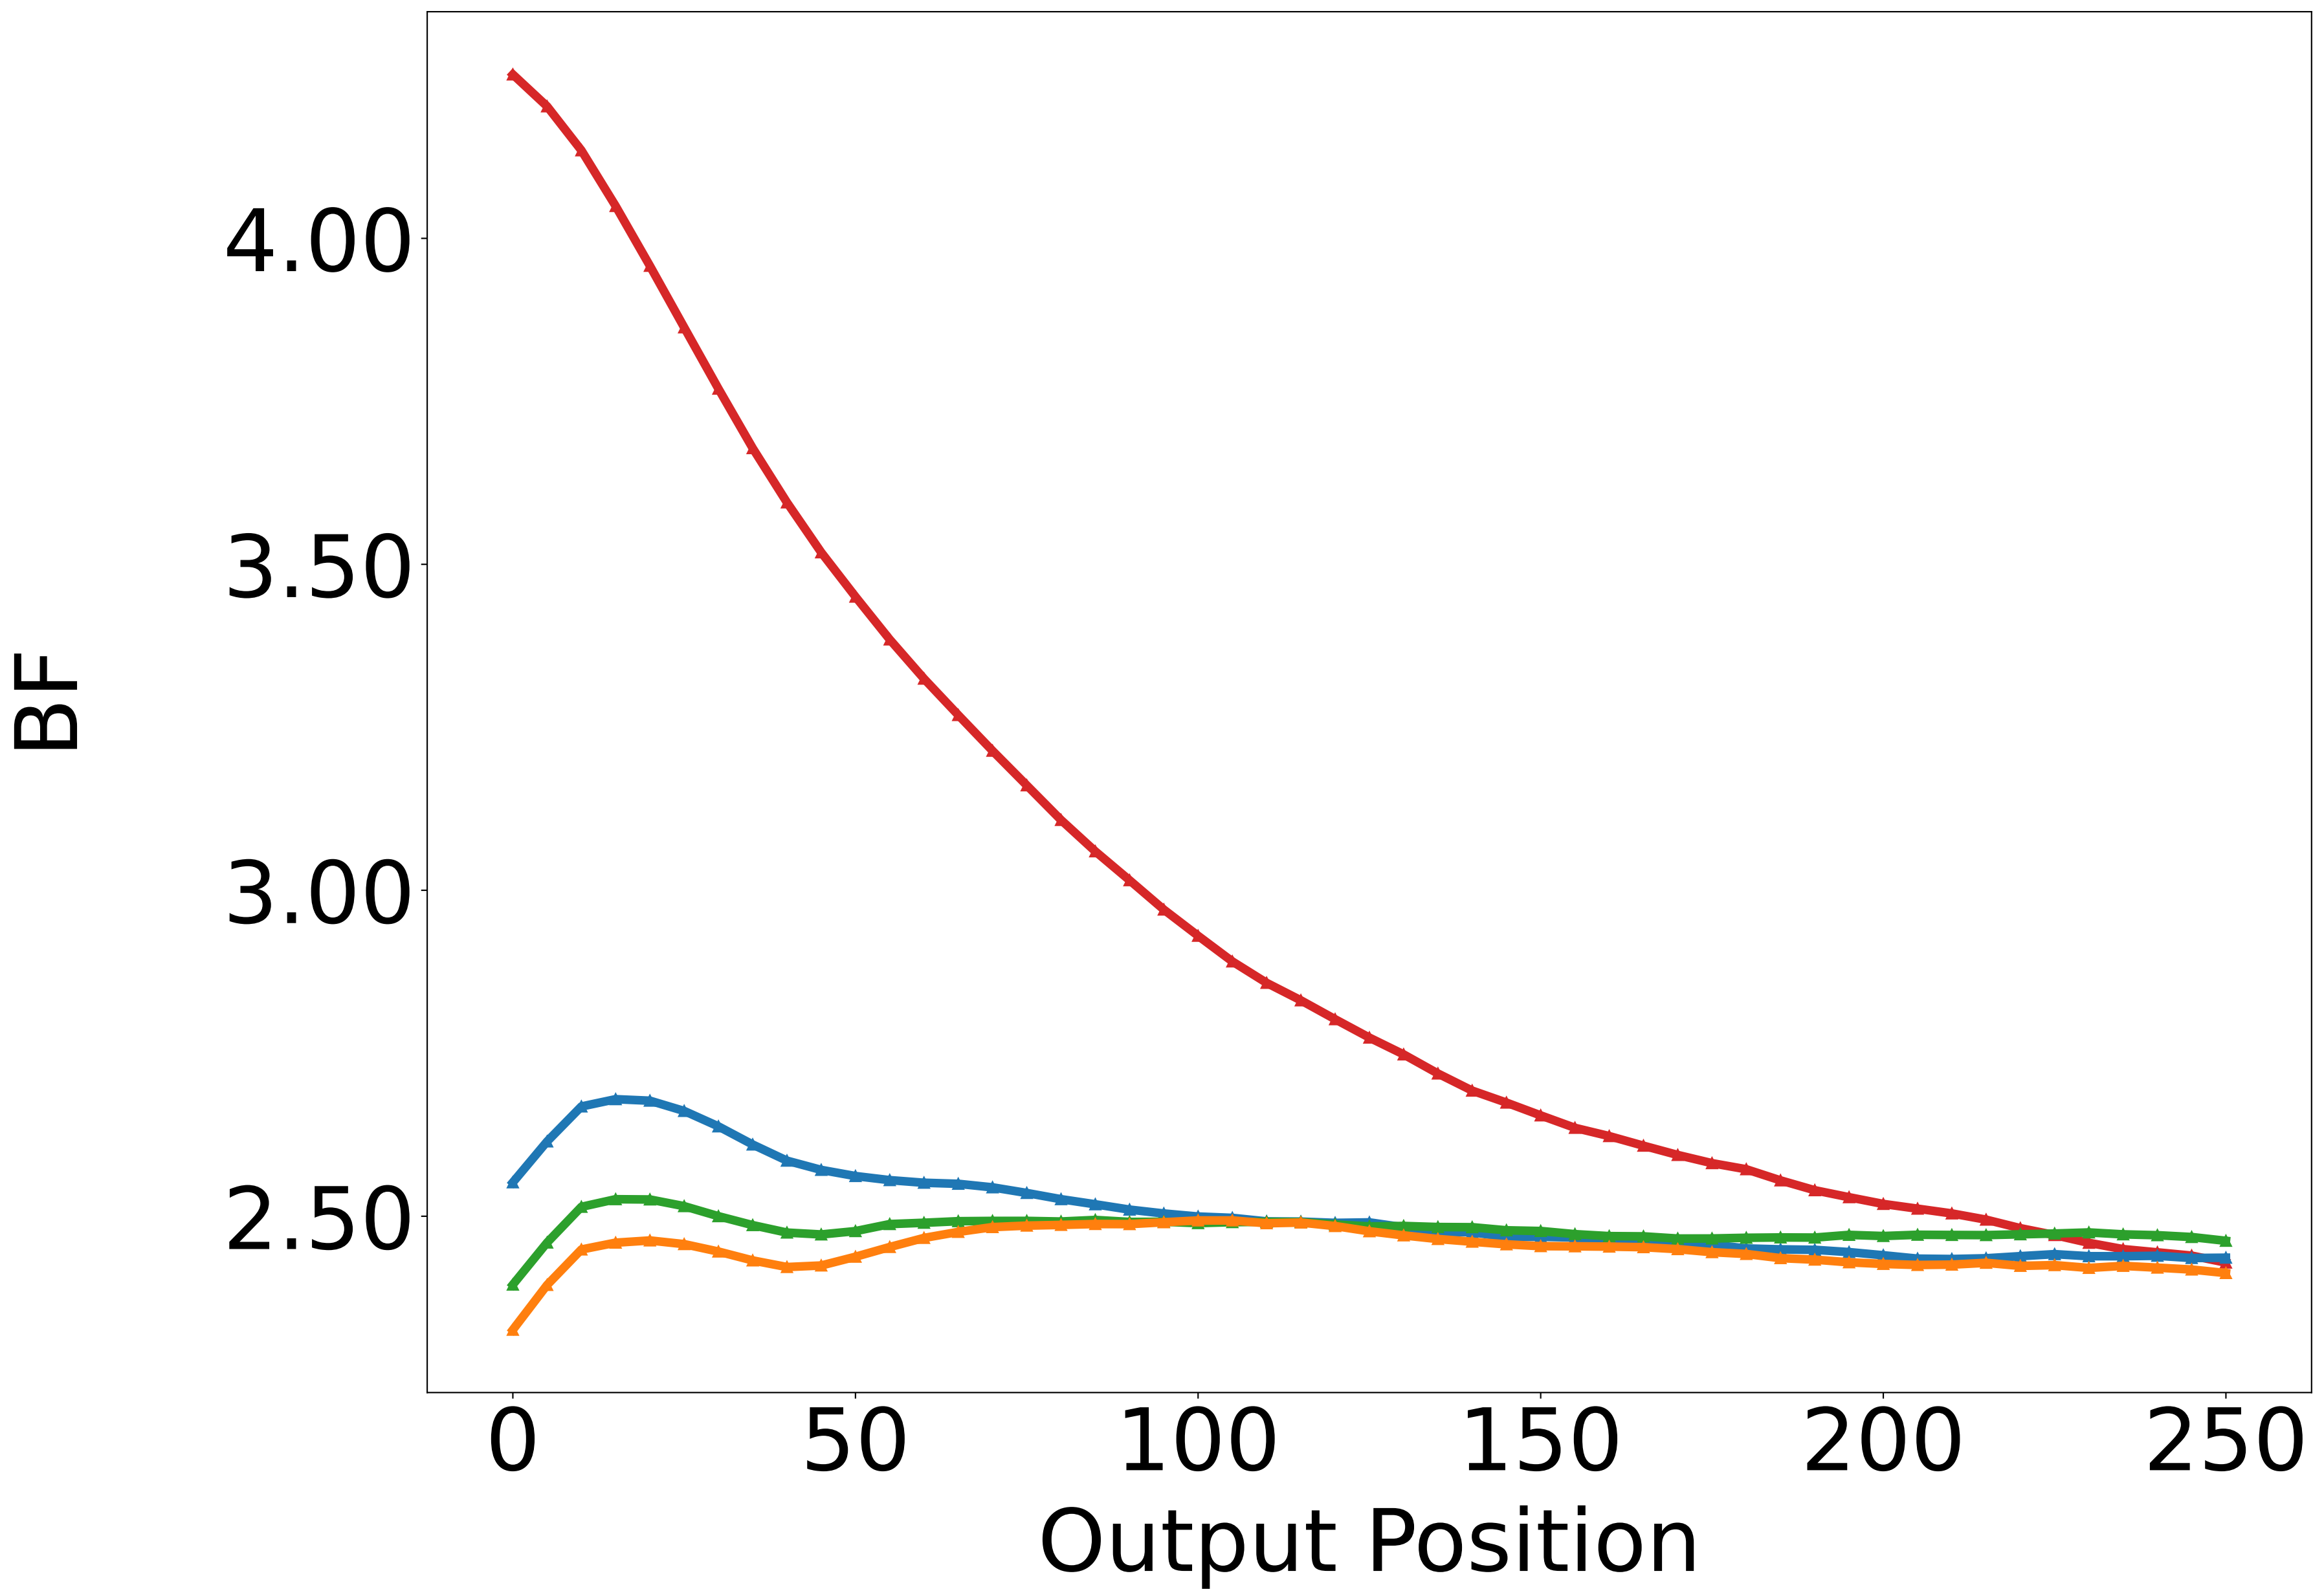

Supplement: supplementary_material [file piecewise_ebf_Llama-2-70B_bf.pdf › supplementary_materials/bf_output_dynamic/mmlu/piecewise_ebf_Llama-2-70B_bf.pdf]

# Llama-2-70B

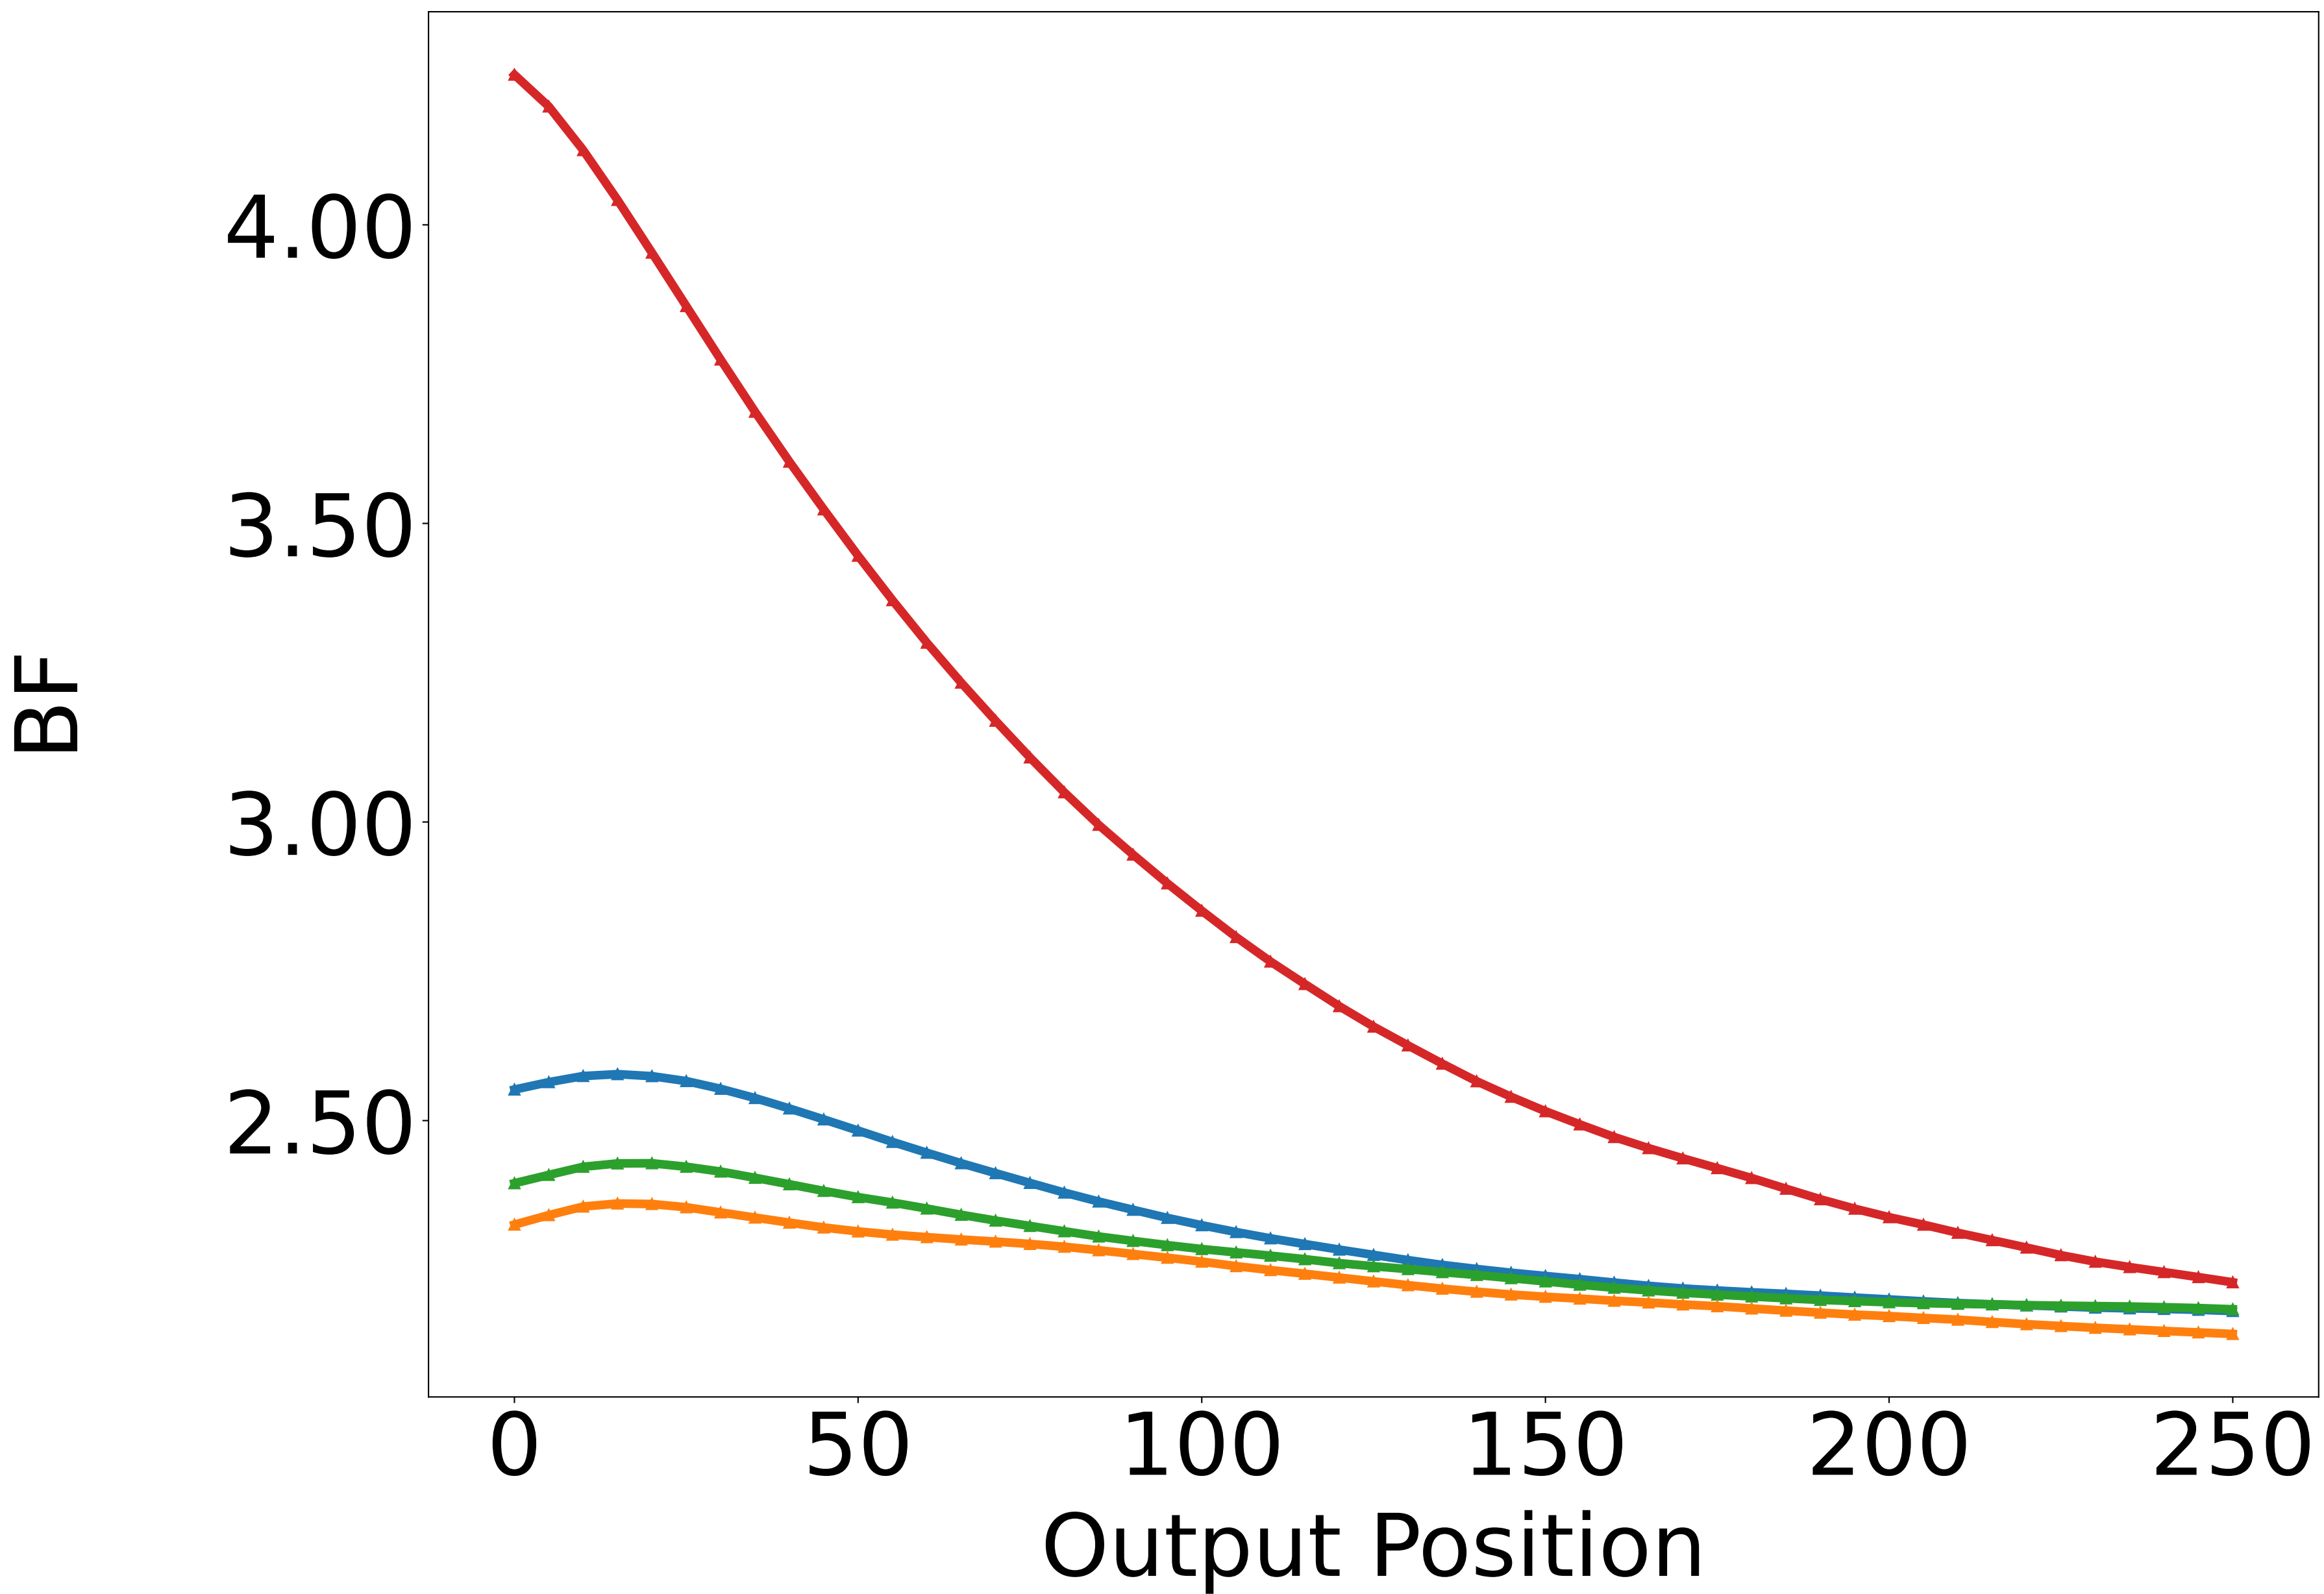

Prompt Complexity (C)

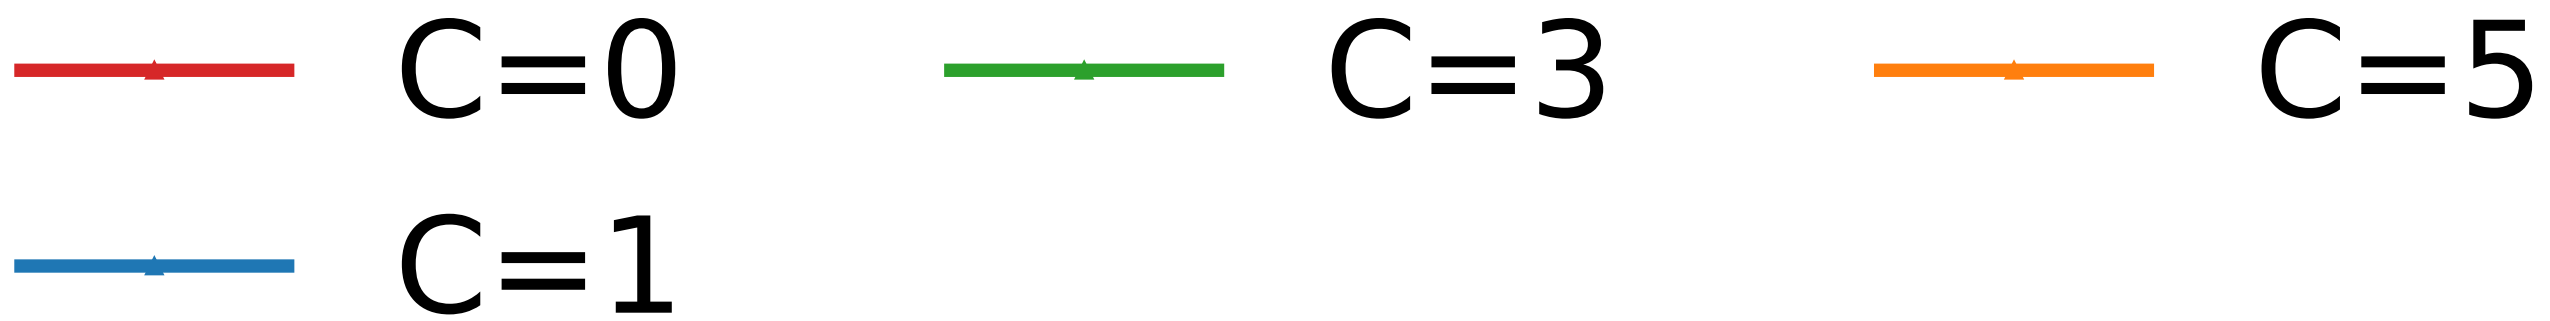

Supplement: supplementary_material [file piecewise_ebf_Llama-2-70B_bf_fixed_start.pdf › supplementary_materials/bf_output_dynamic/mmlu/piecewise_ebf_Llama-2-70B_bf_fixed_start.pdf]

# Llama-3-70B-Instruct

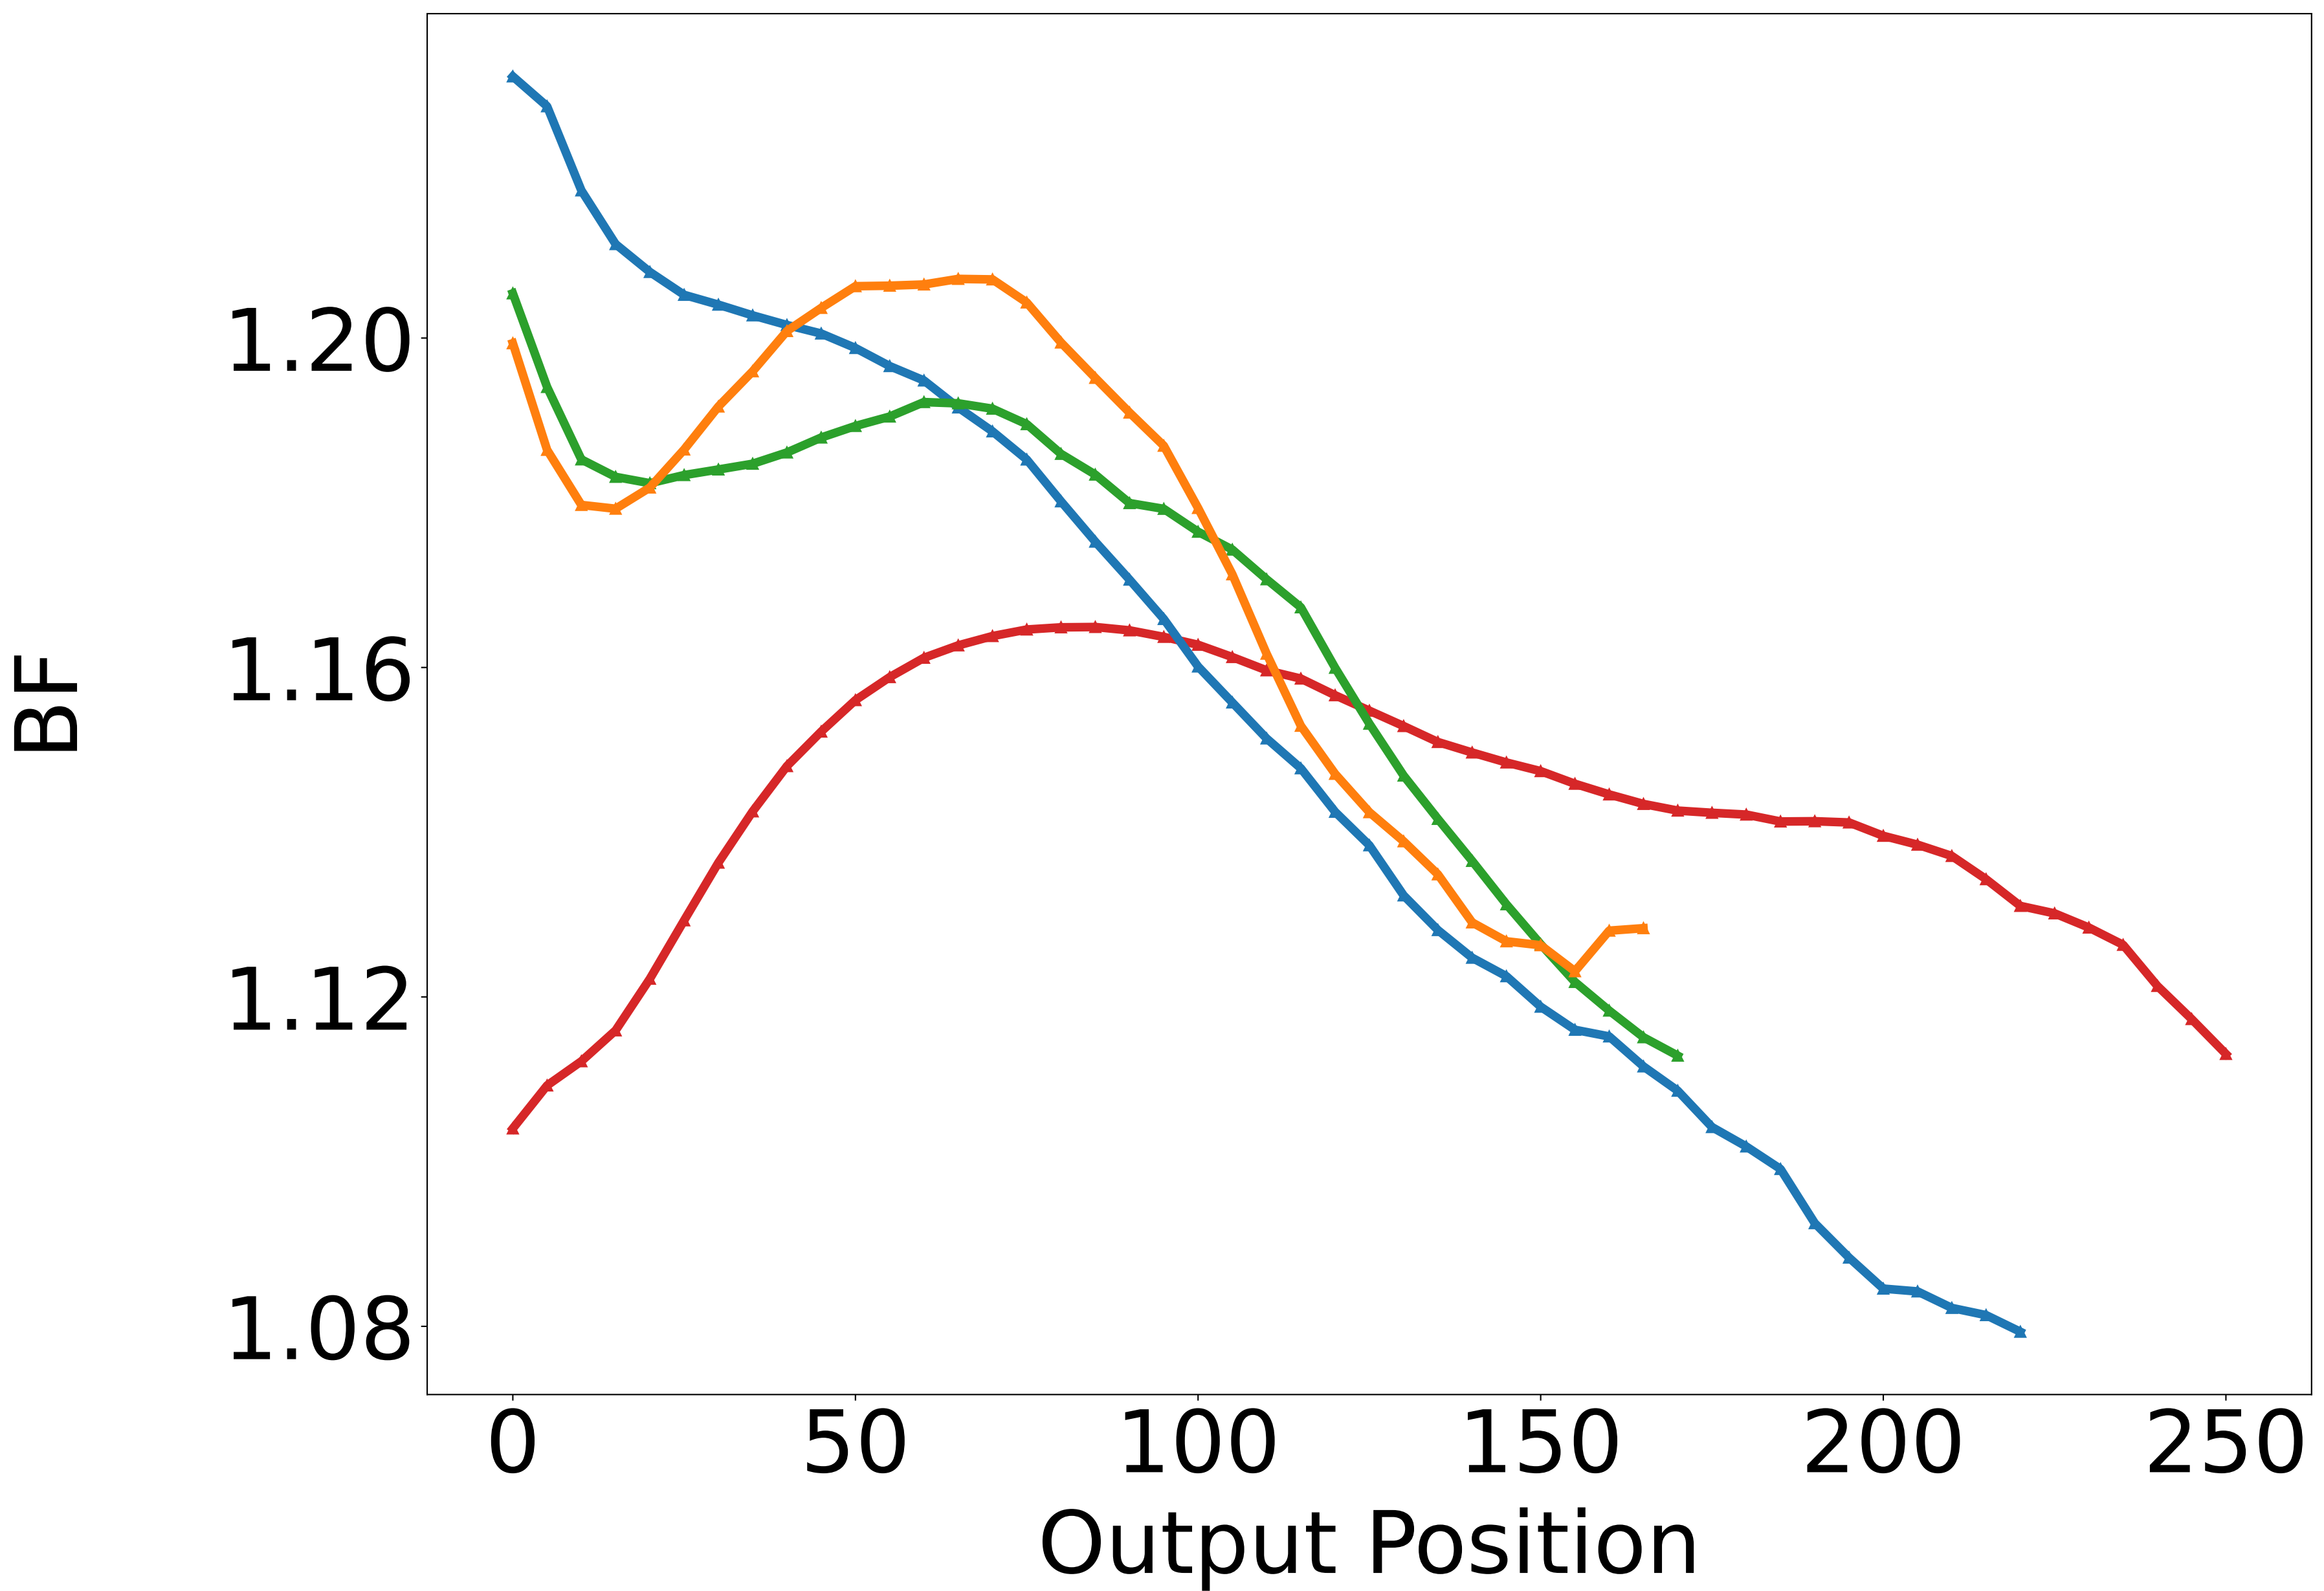

Prompt Complexity (C)

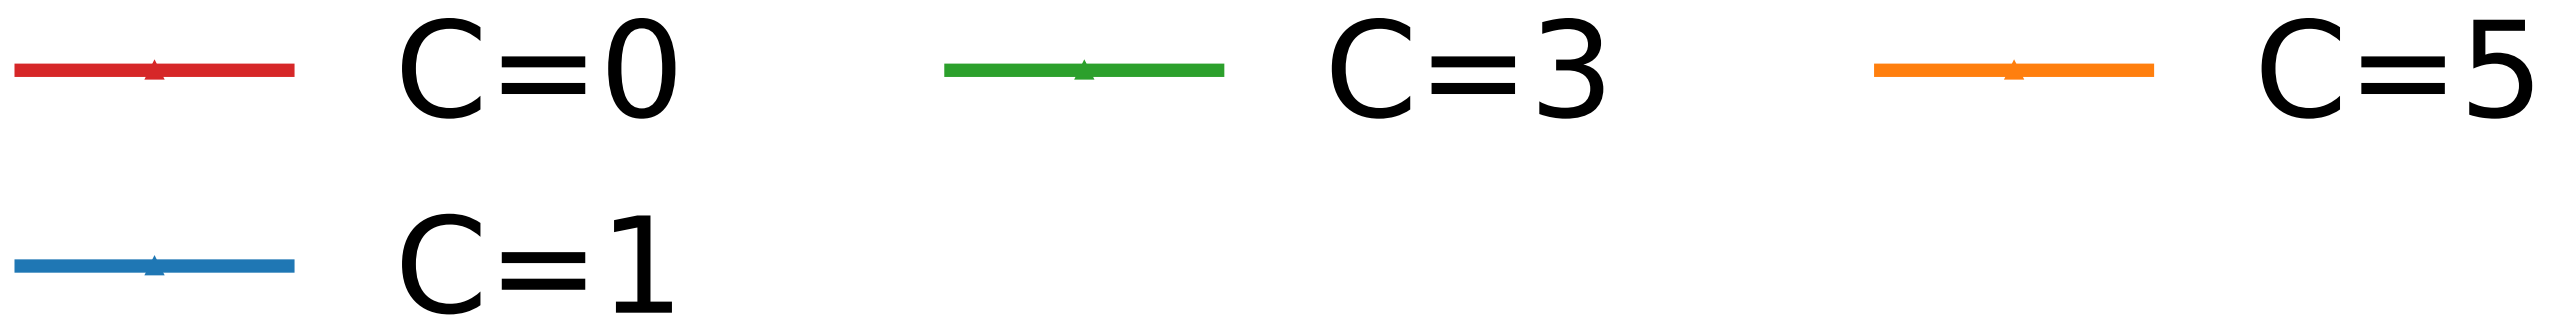

Supplement: supplementary_material [file piecewise_ebf_Llama-3-70B-Instruct_bf.pdf › supplementary_materials/bf_output_dynamic/mmlu/piecewise_ebf_Llama-3-70B-Instruct_bf.pdf]

# Llama-3-70B-Instruct

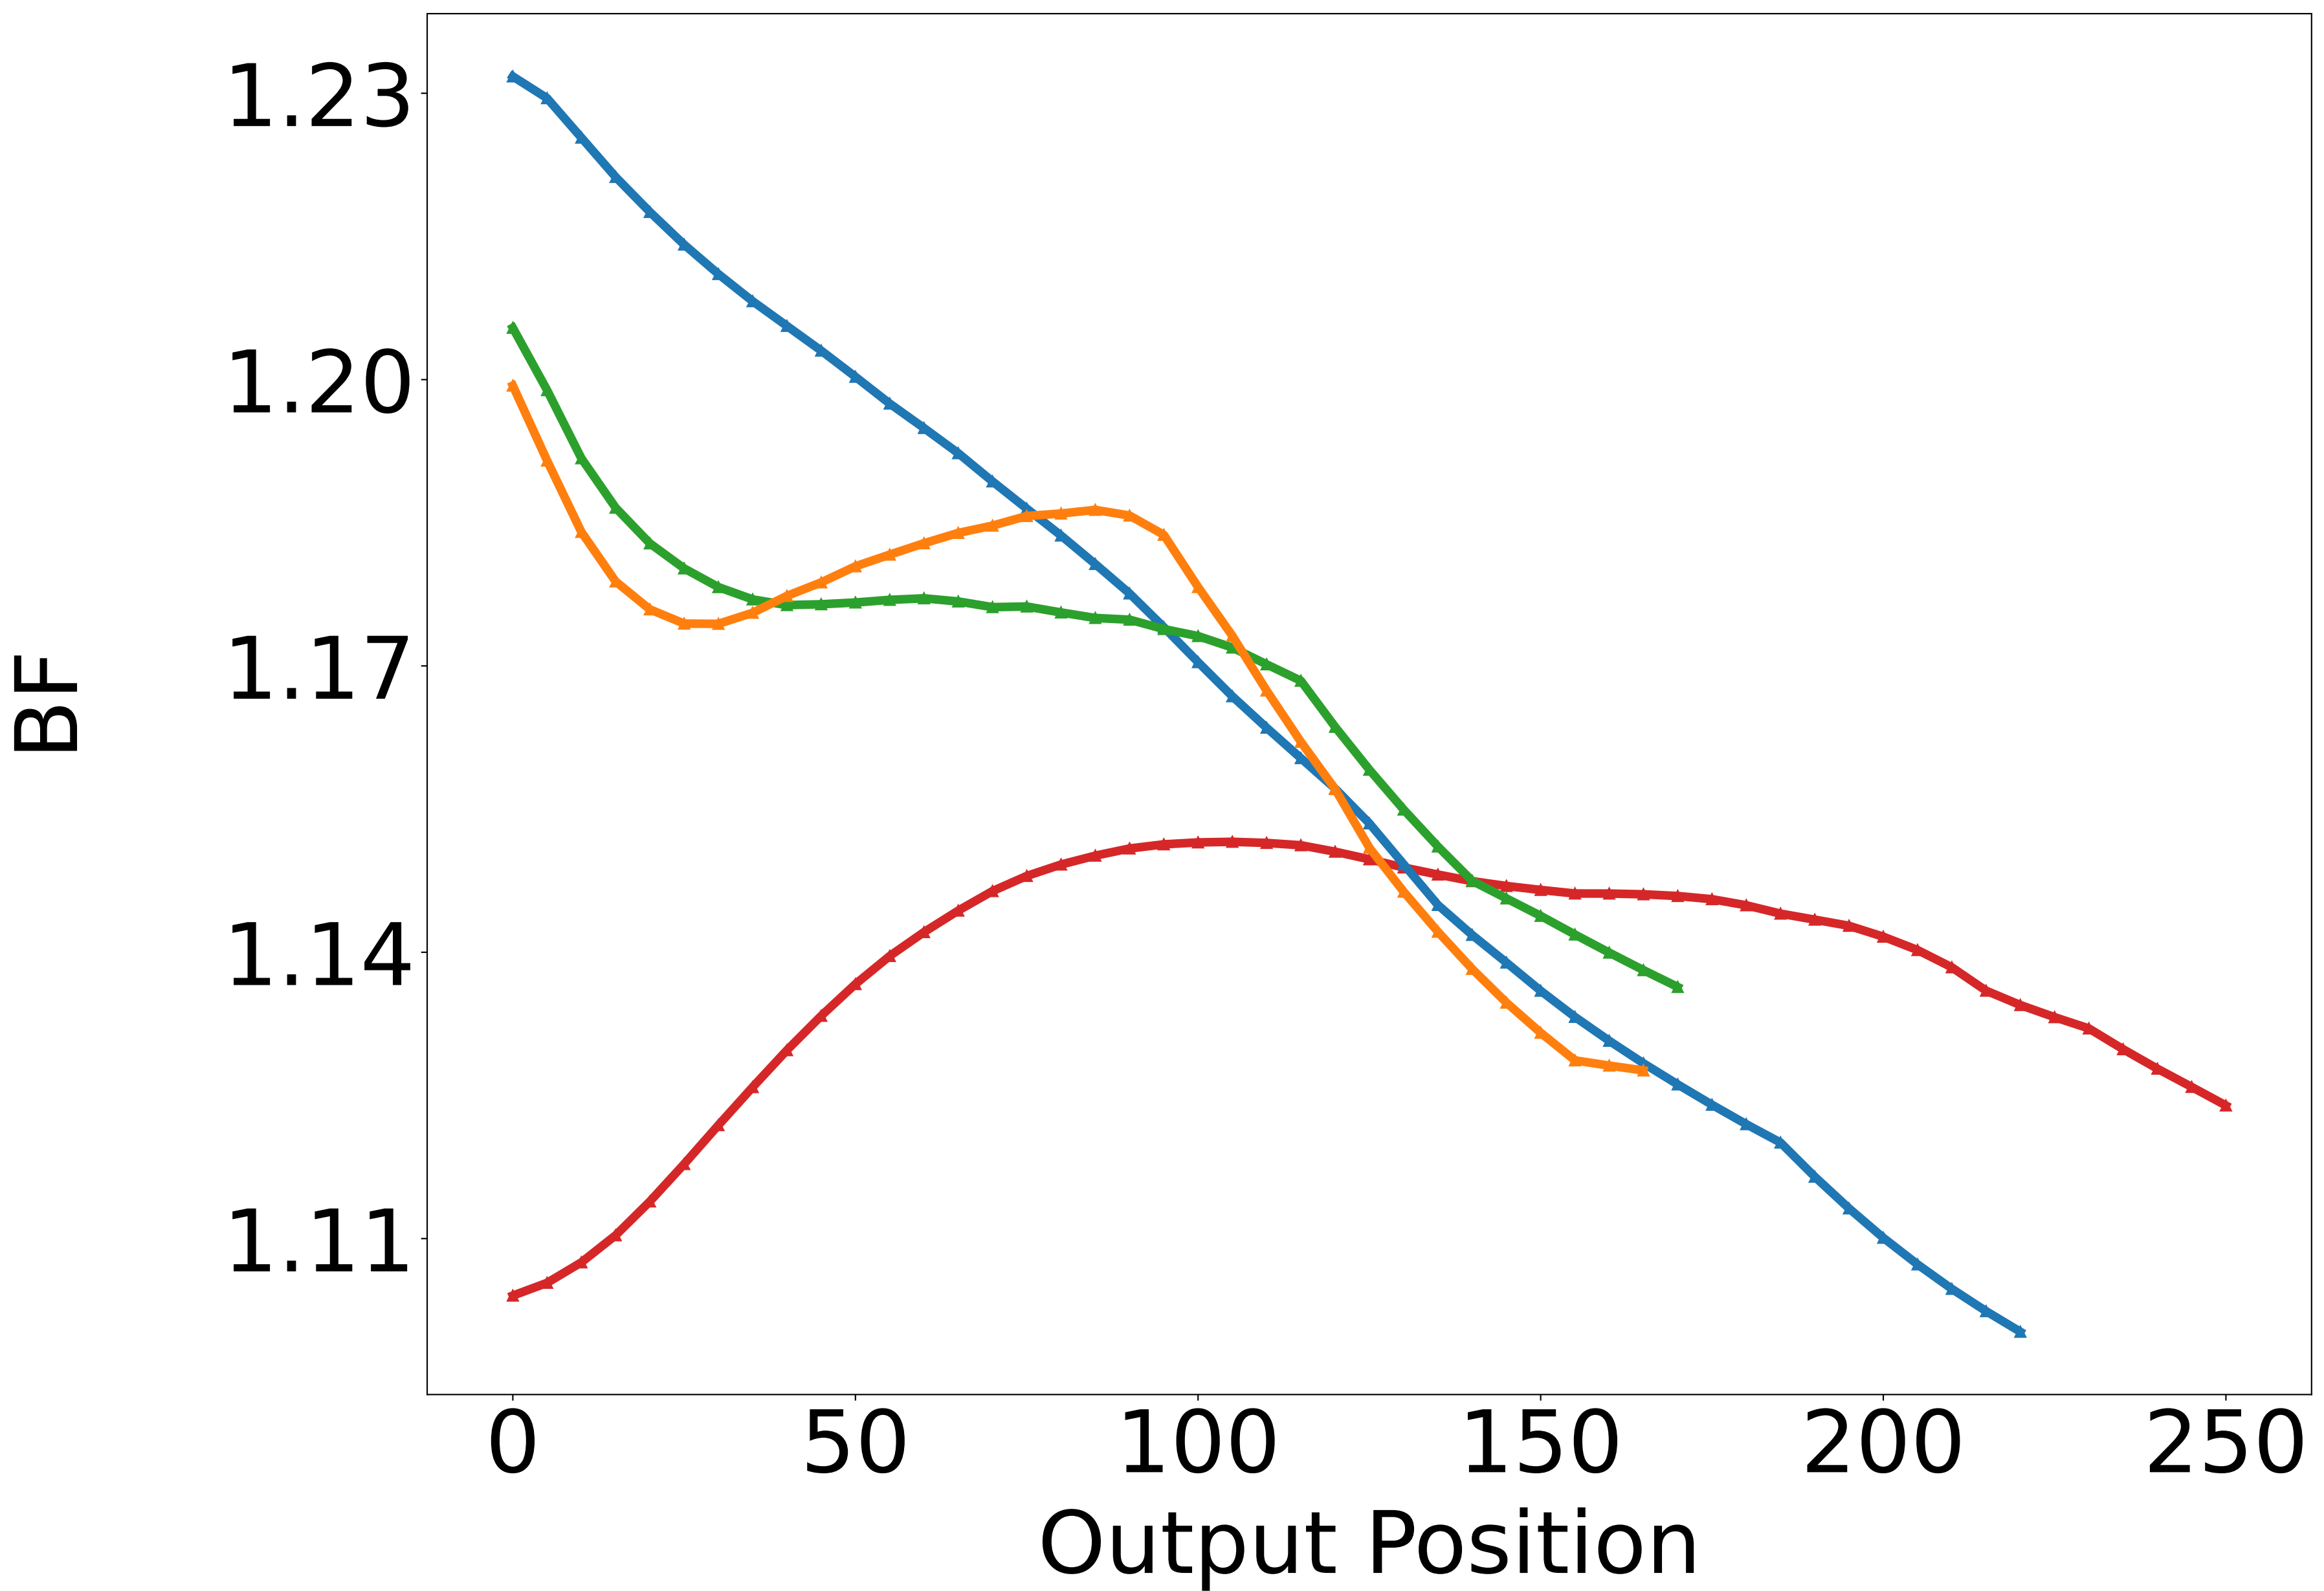

Supplement: supplementary_material [file piecewise_ebf_Llama-3-70B-Instruct_bf_fixed_start.pdf › supplementary_materials/bf_output_dynamic/mmlu/piecewise_ebf_Llama-3-70B-Instruct_bf_fixed_start.pdf]

# Llama-3-70B

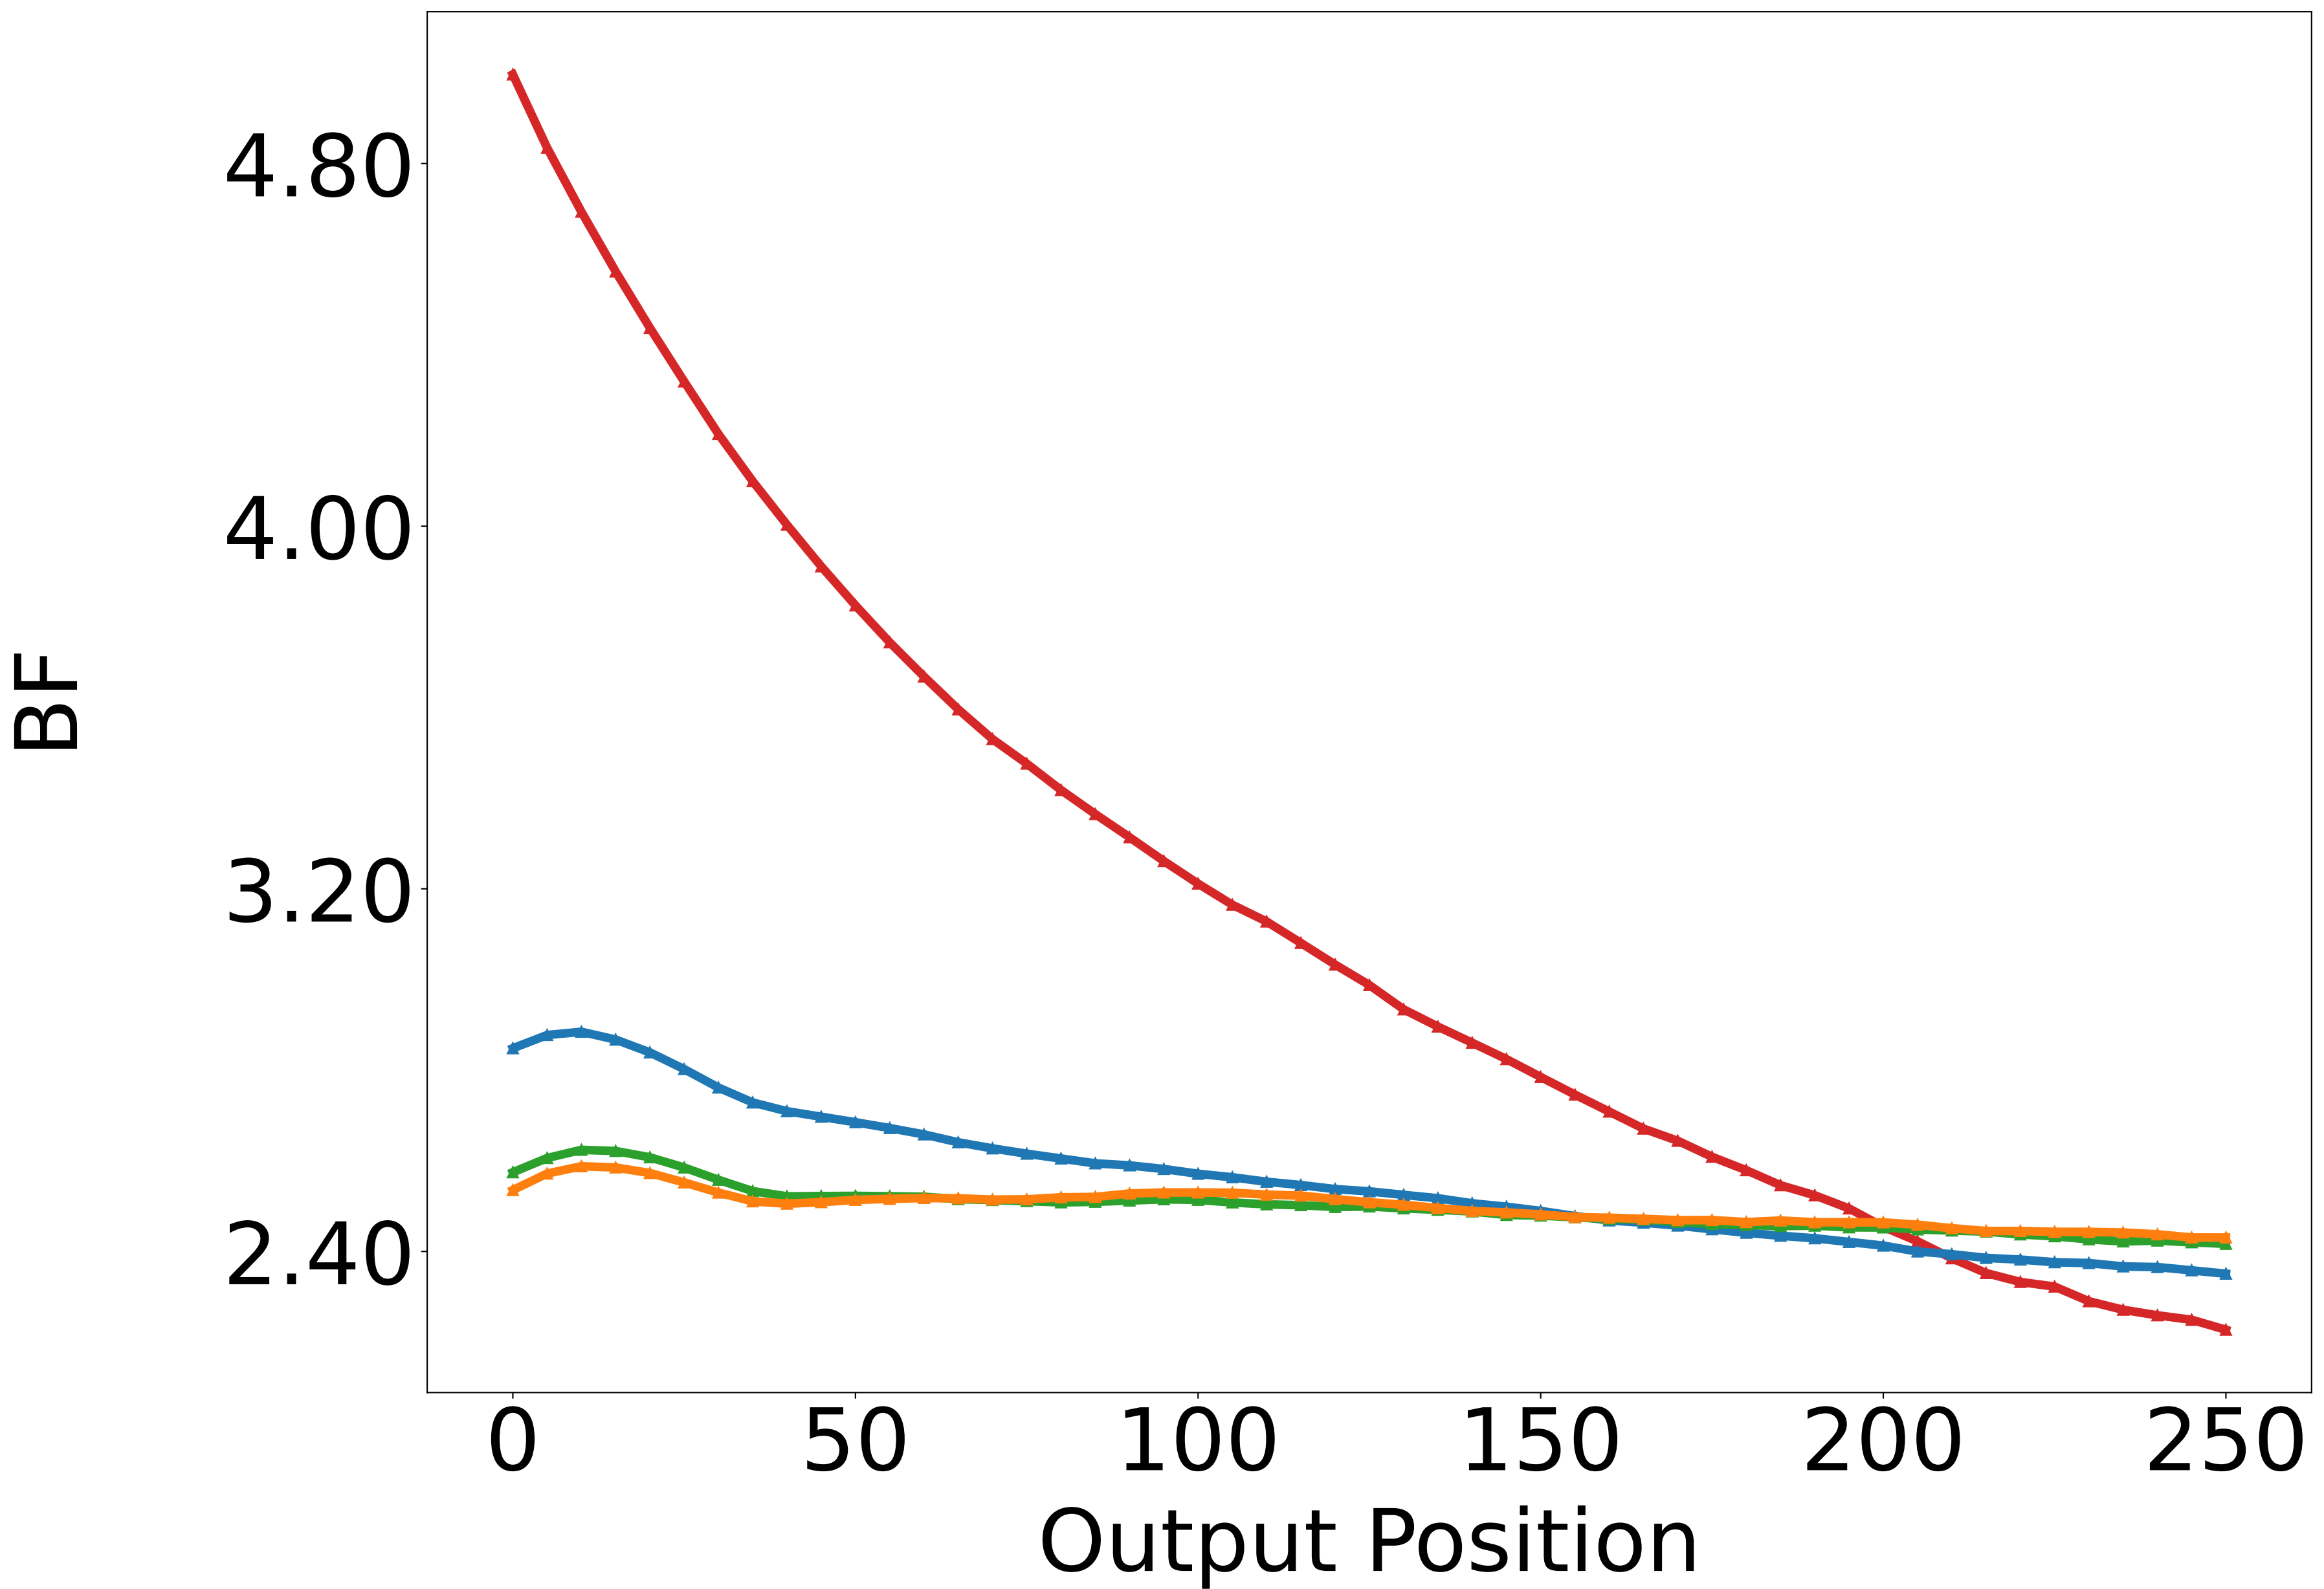

Prompt Complexity (C)



Supplement: supplementary_material [file piecewise_ebf_Llama-3-70B_bf.pdf › supplementary_materials/bf_output_dynamic/mmlu/piecewise_ebf_Llama-3-70B_bf.pdf]

# Llama-3-70B

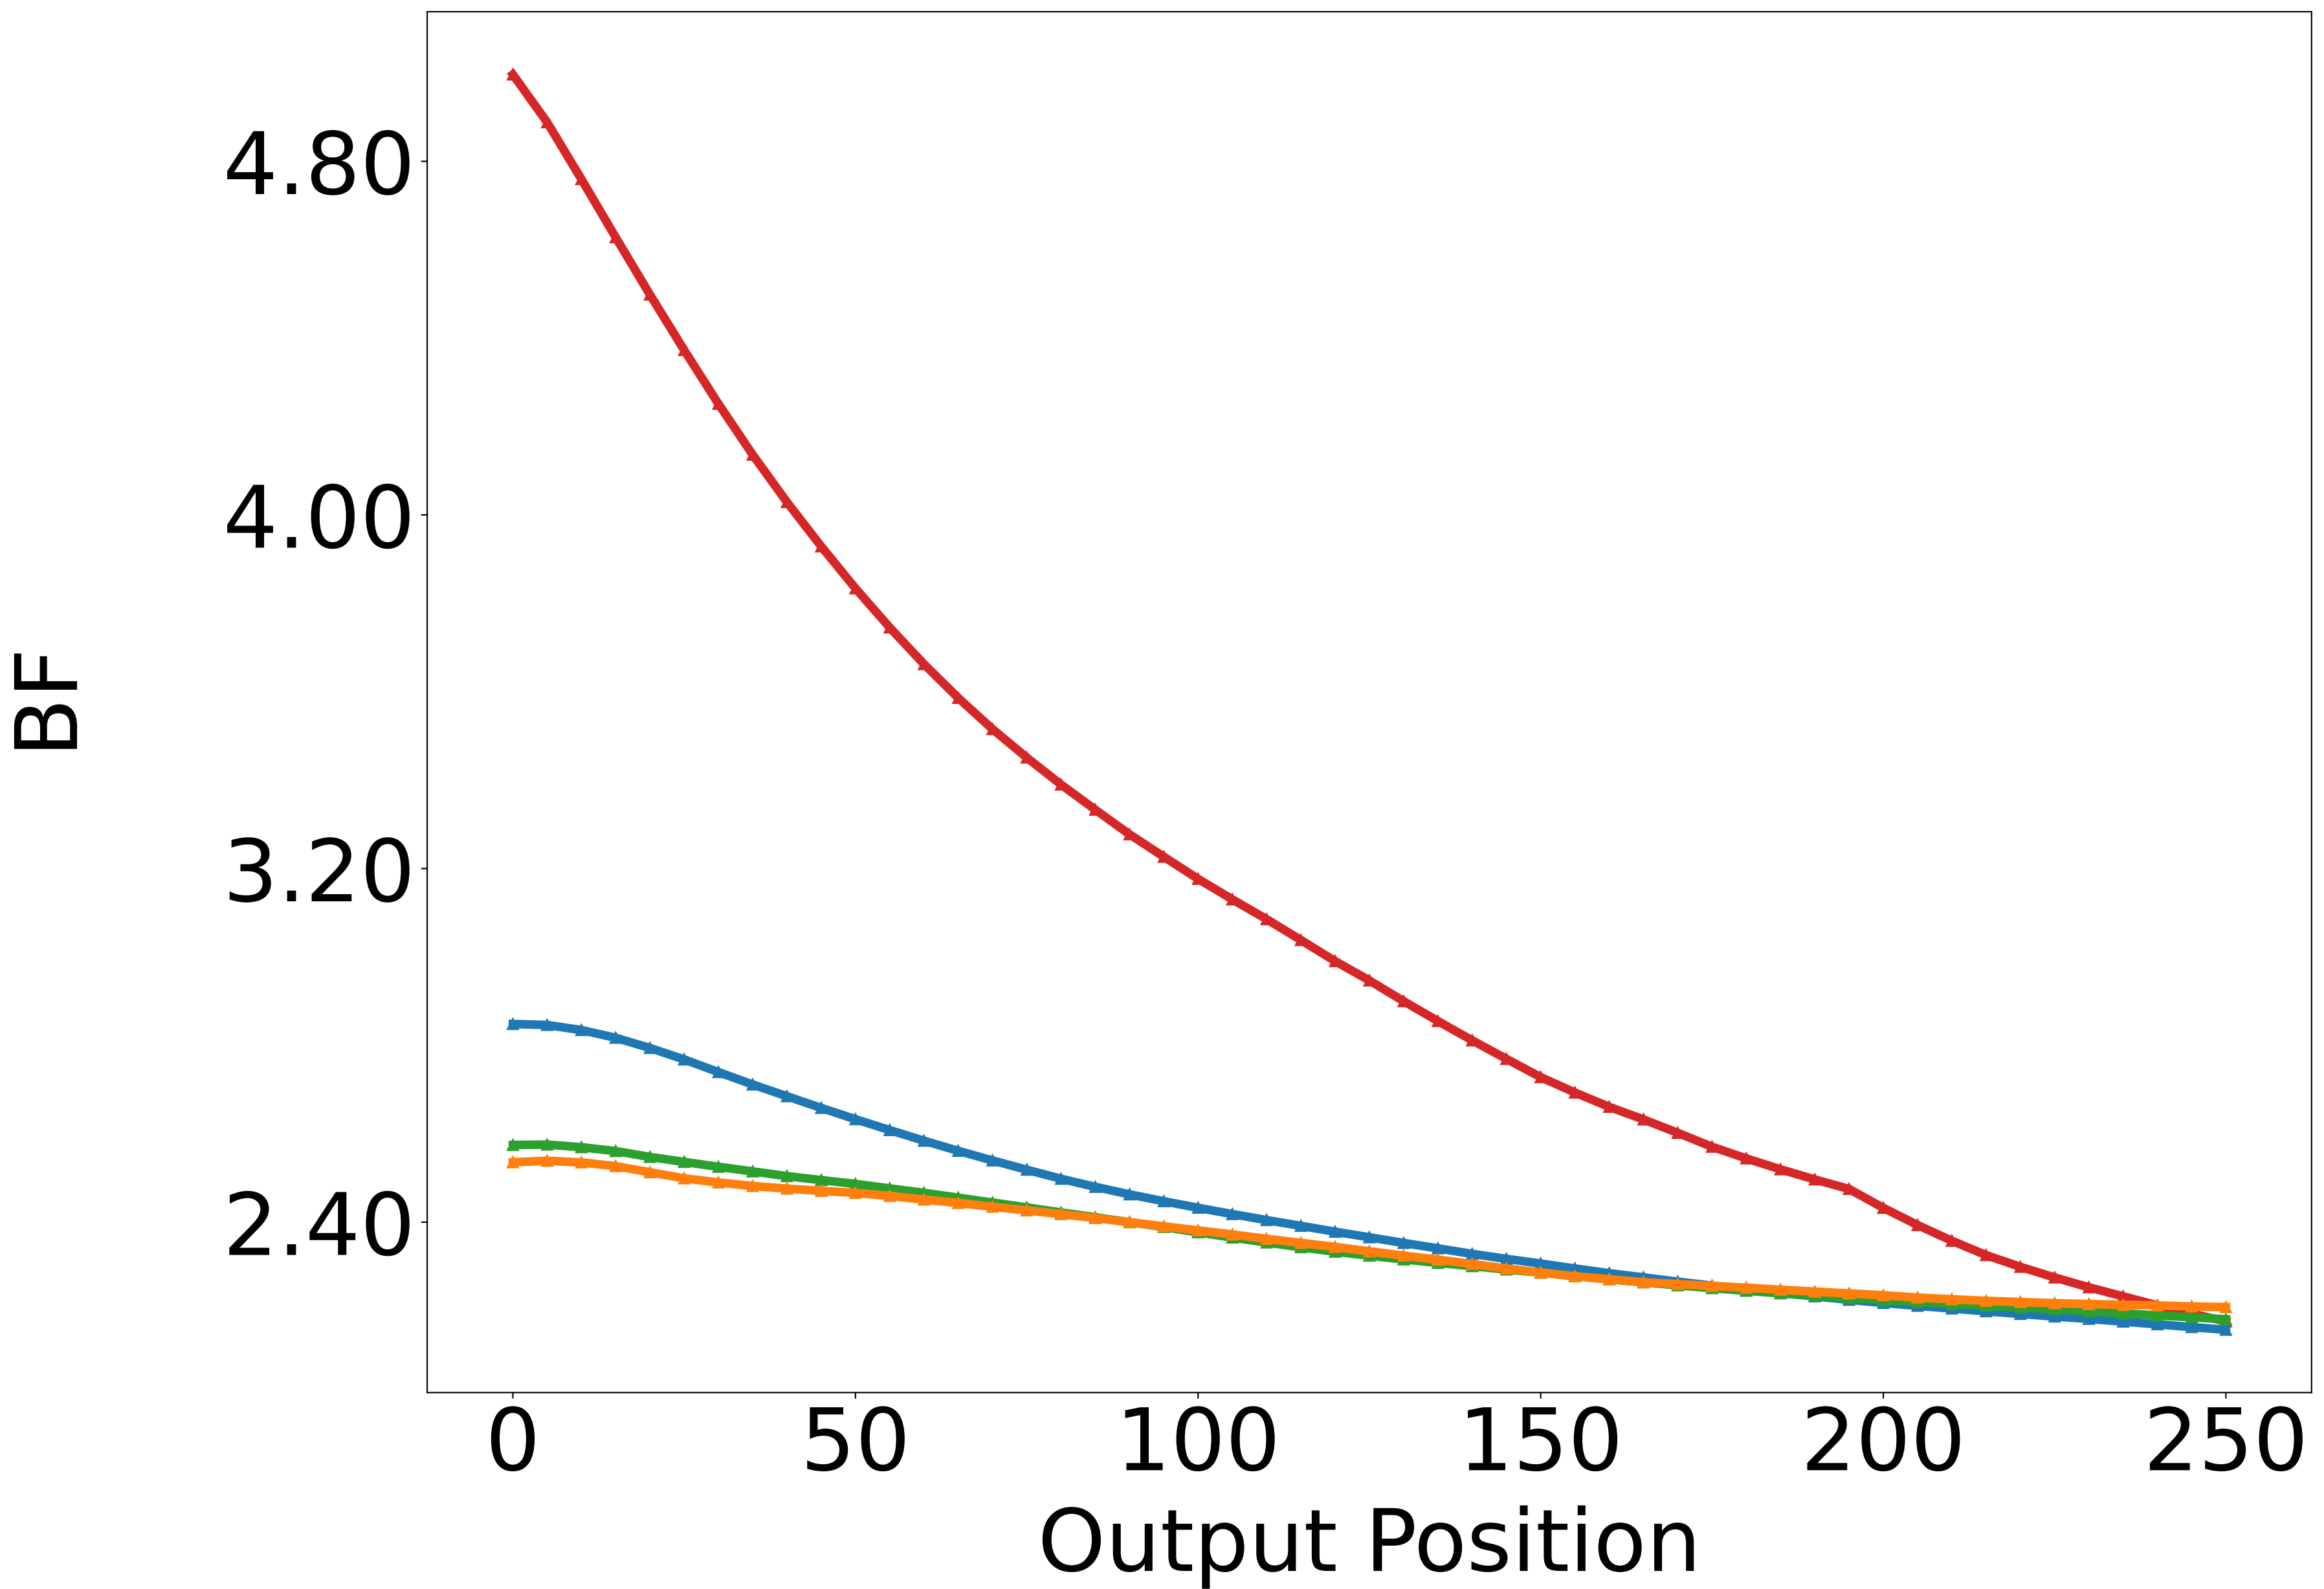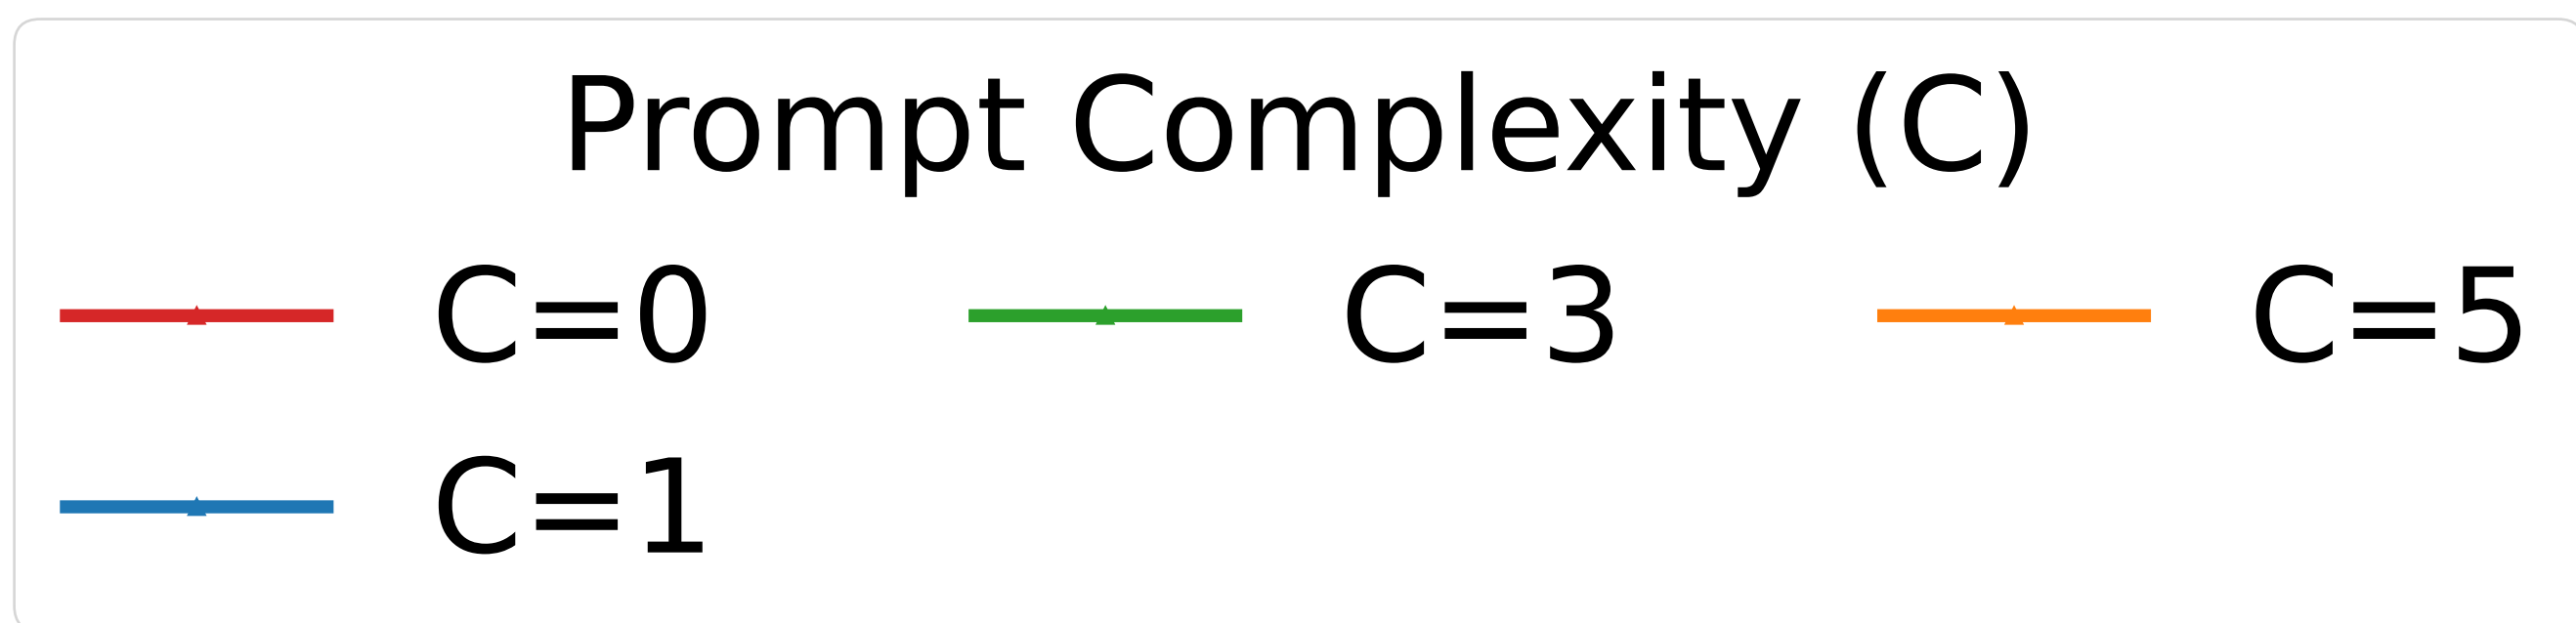

Supplement: supplementary_material [file piecewise_ebf_Llama-3-70B_bf_fixed_start.pdf › supplementary_materials/bf_output_dynamic/mmlu/piecewise_ebf_Llama-3-70B_bf_fixed_start.pdf]

# Llama-3-8B-Instruct

BF

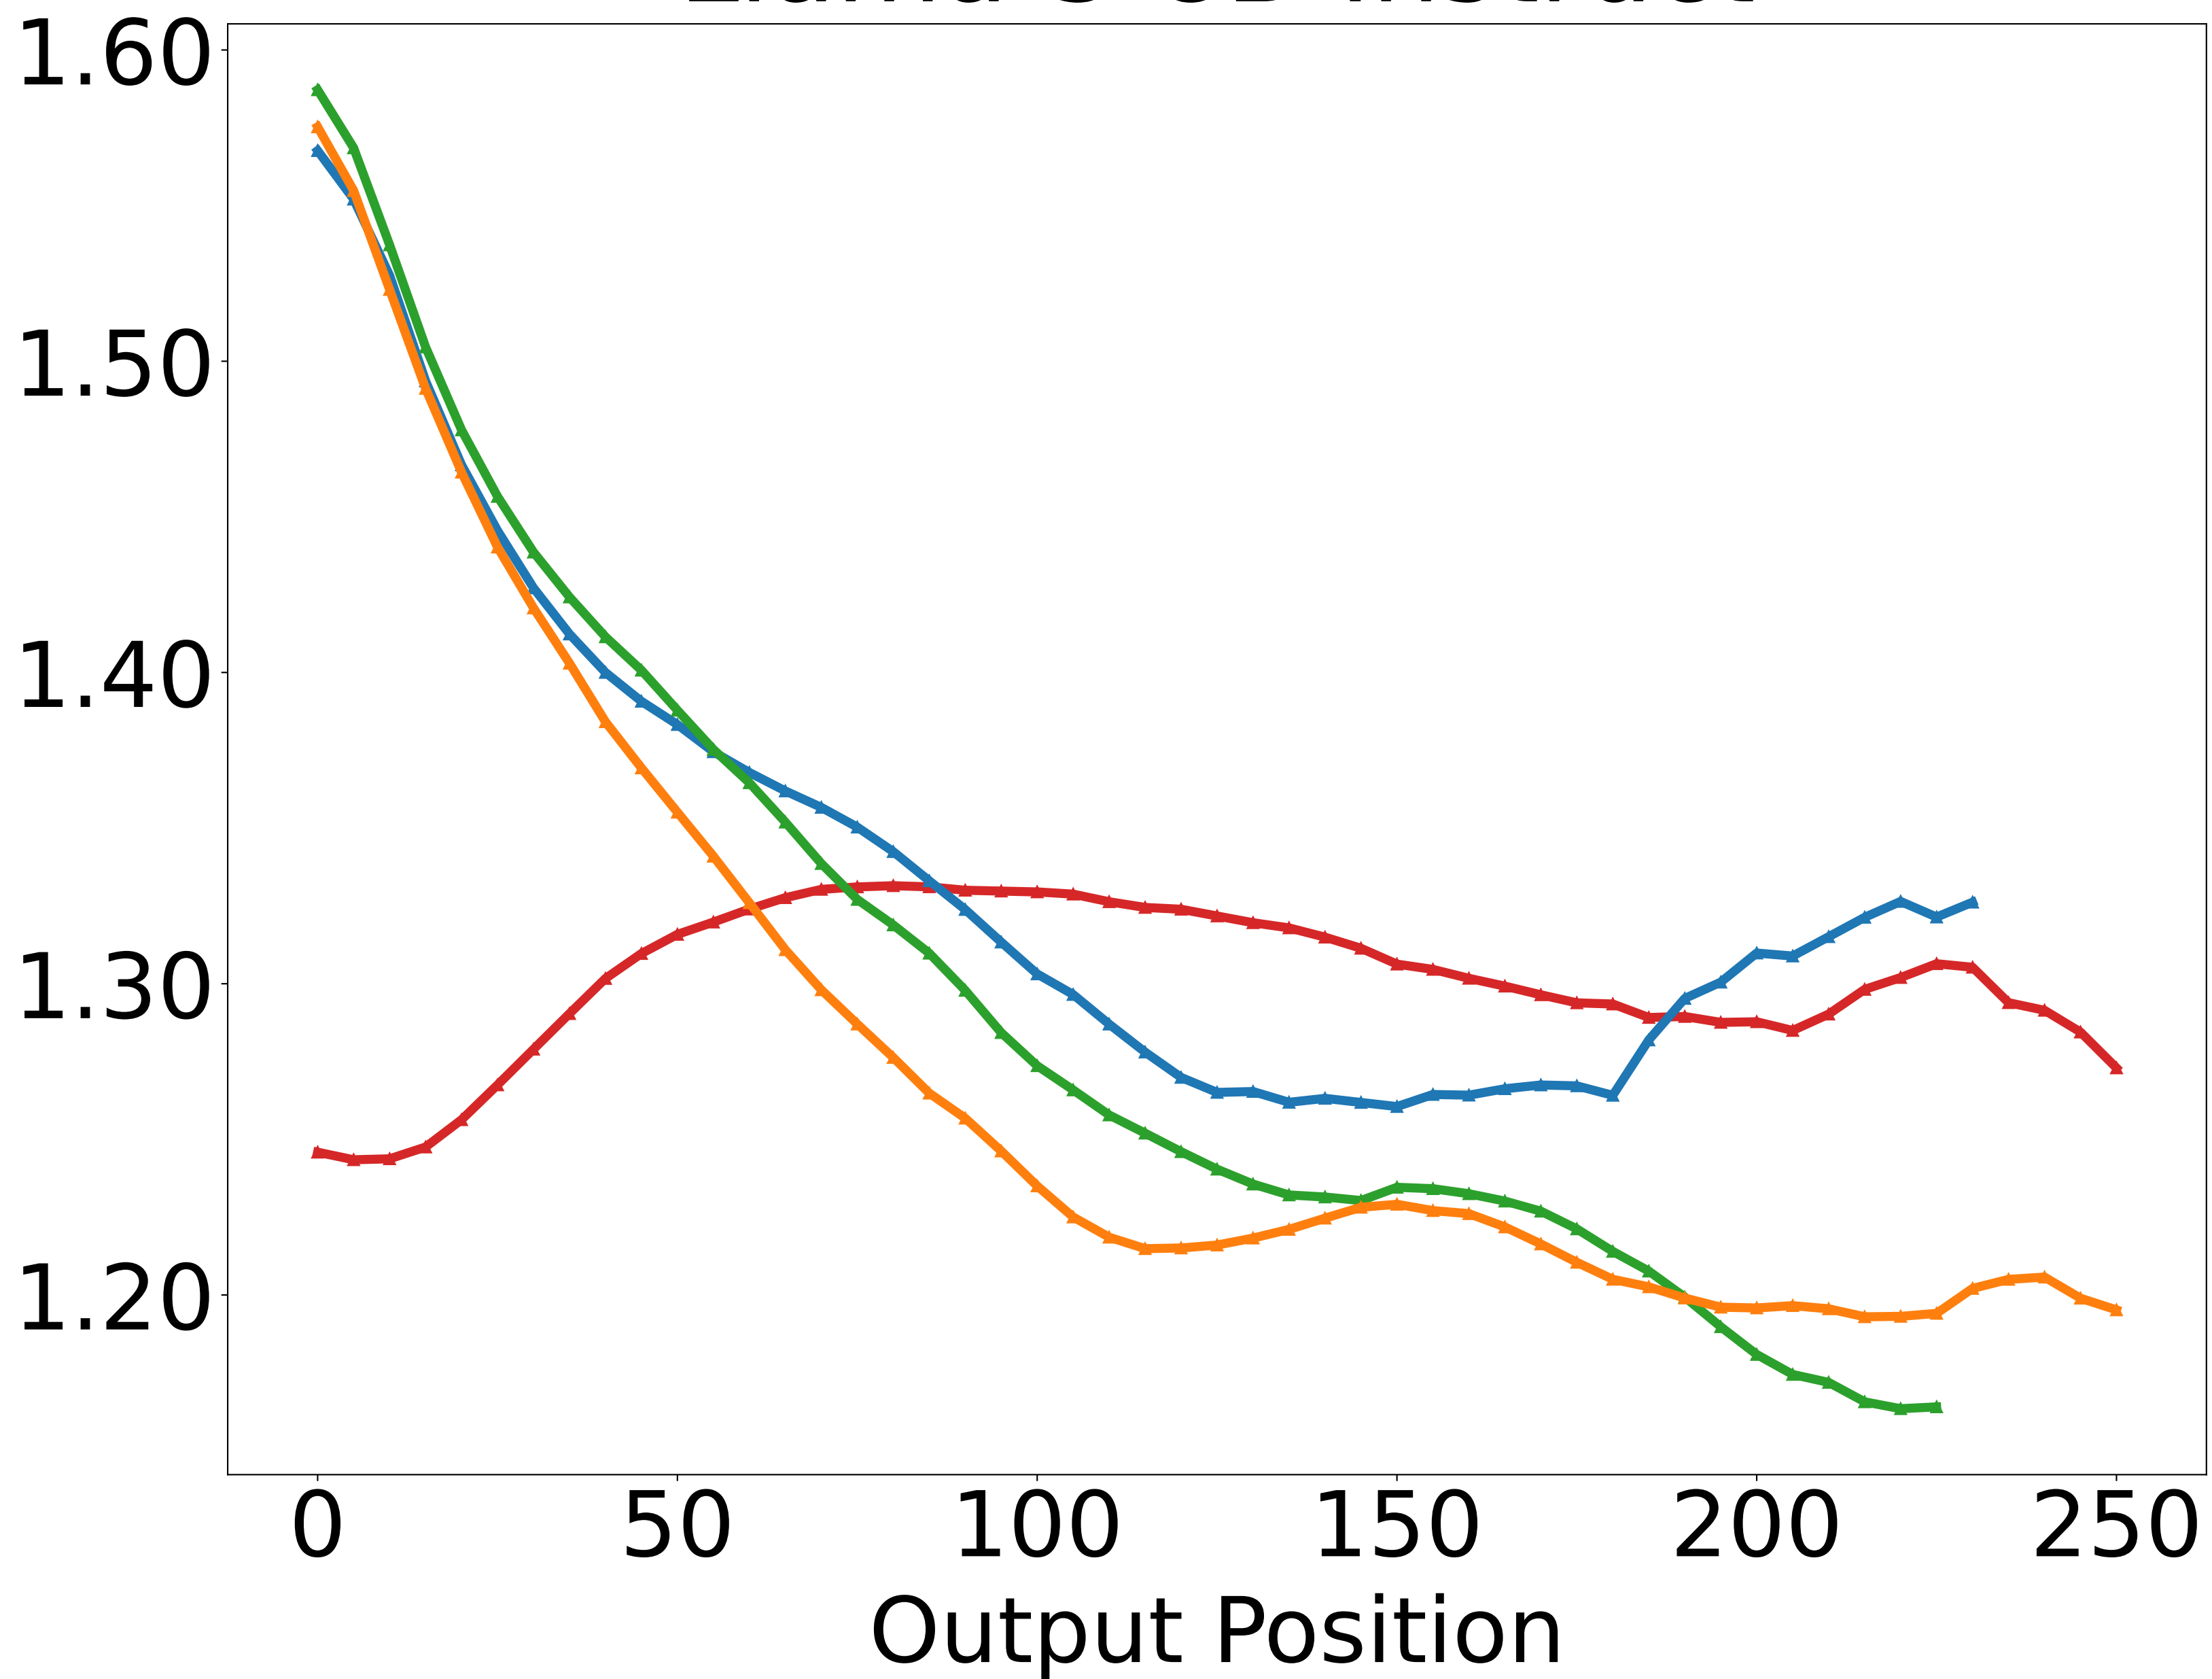

Prompt Complexity (C)

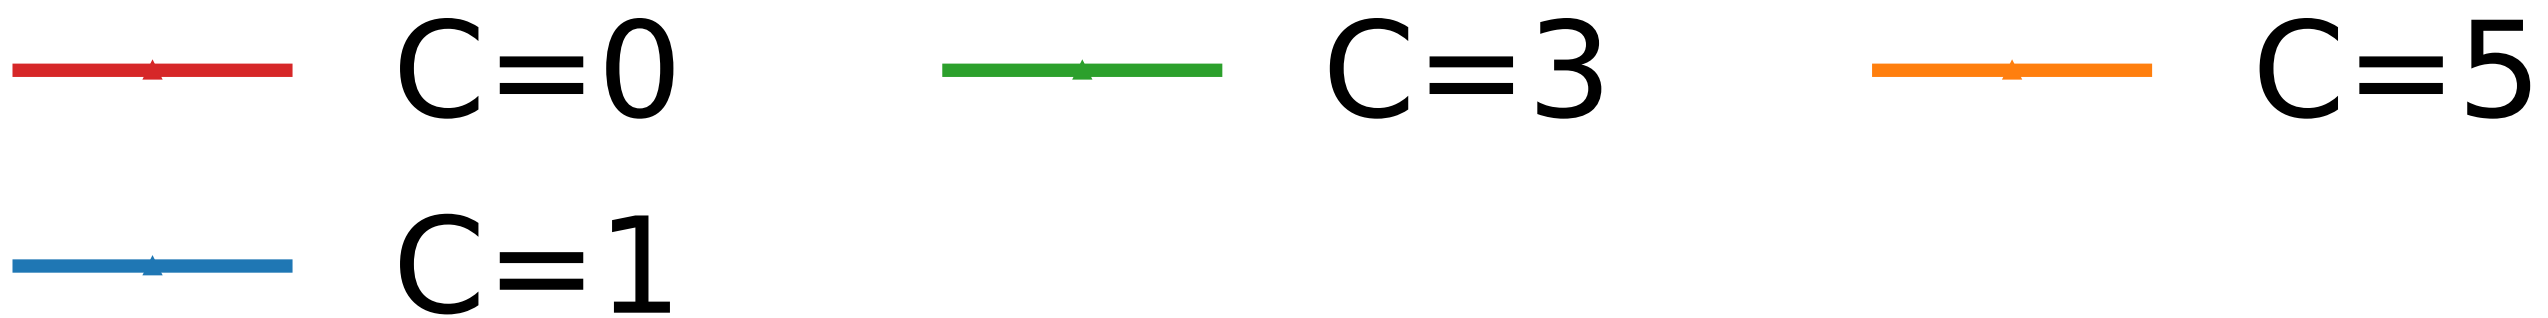

Supplement: supplementary_material [file piecewise_ebf_Llama-3-8B-Instruct_bf.pdf › supplementary_materials/bf_output_dynamic/mmlu/piecewise_ebf_Llama-3-8B-Instruct_bf.pdf]

# Llama-3-8B-Instruct

BF

1.60

1.50

1.40

1.30

1.20

0

50

100

150

200

250

Output Position

Prompt Complexity (C)



C=0



C=3

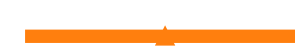

C=5

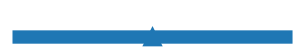

C=1

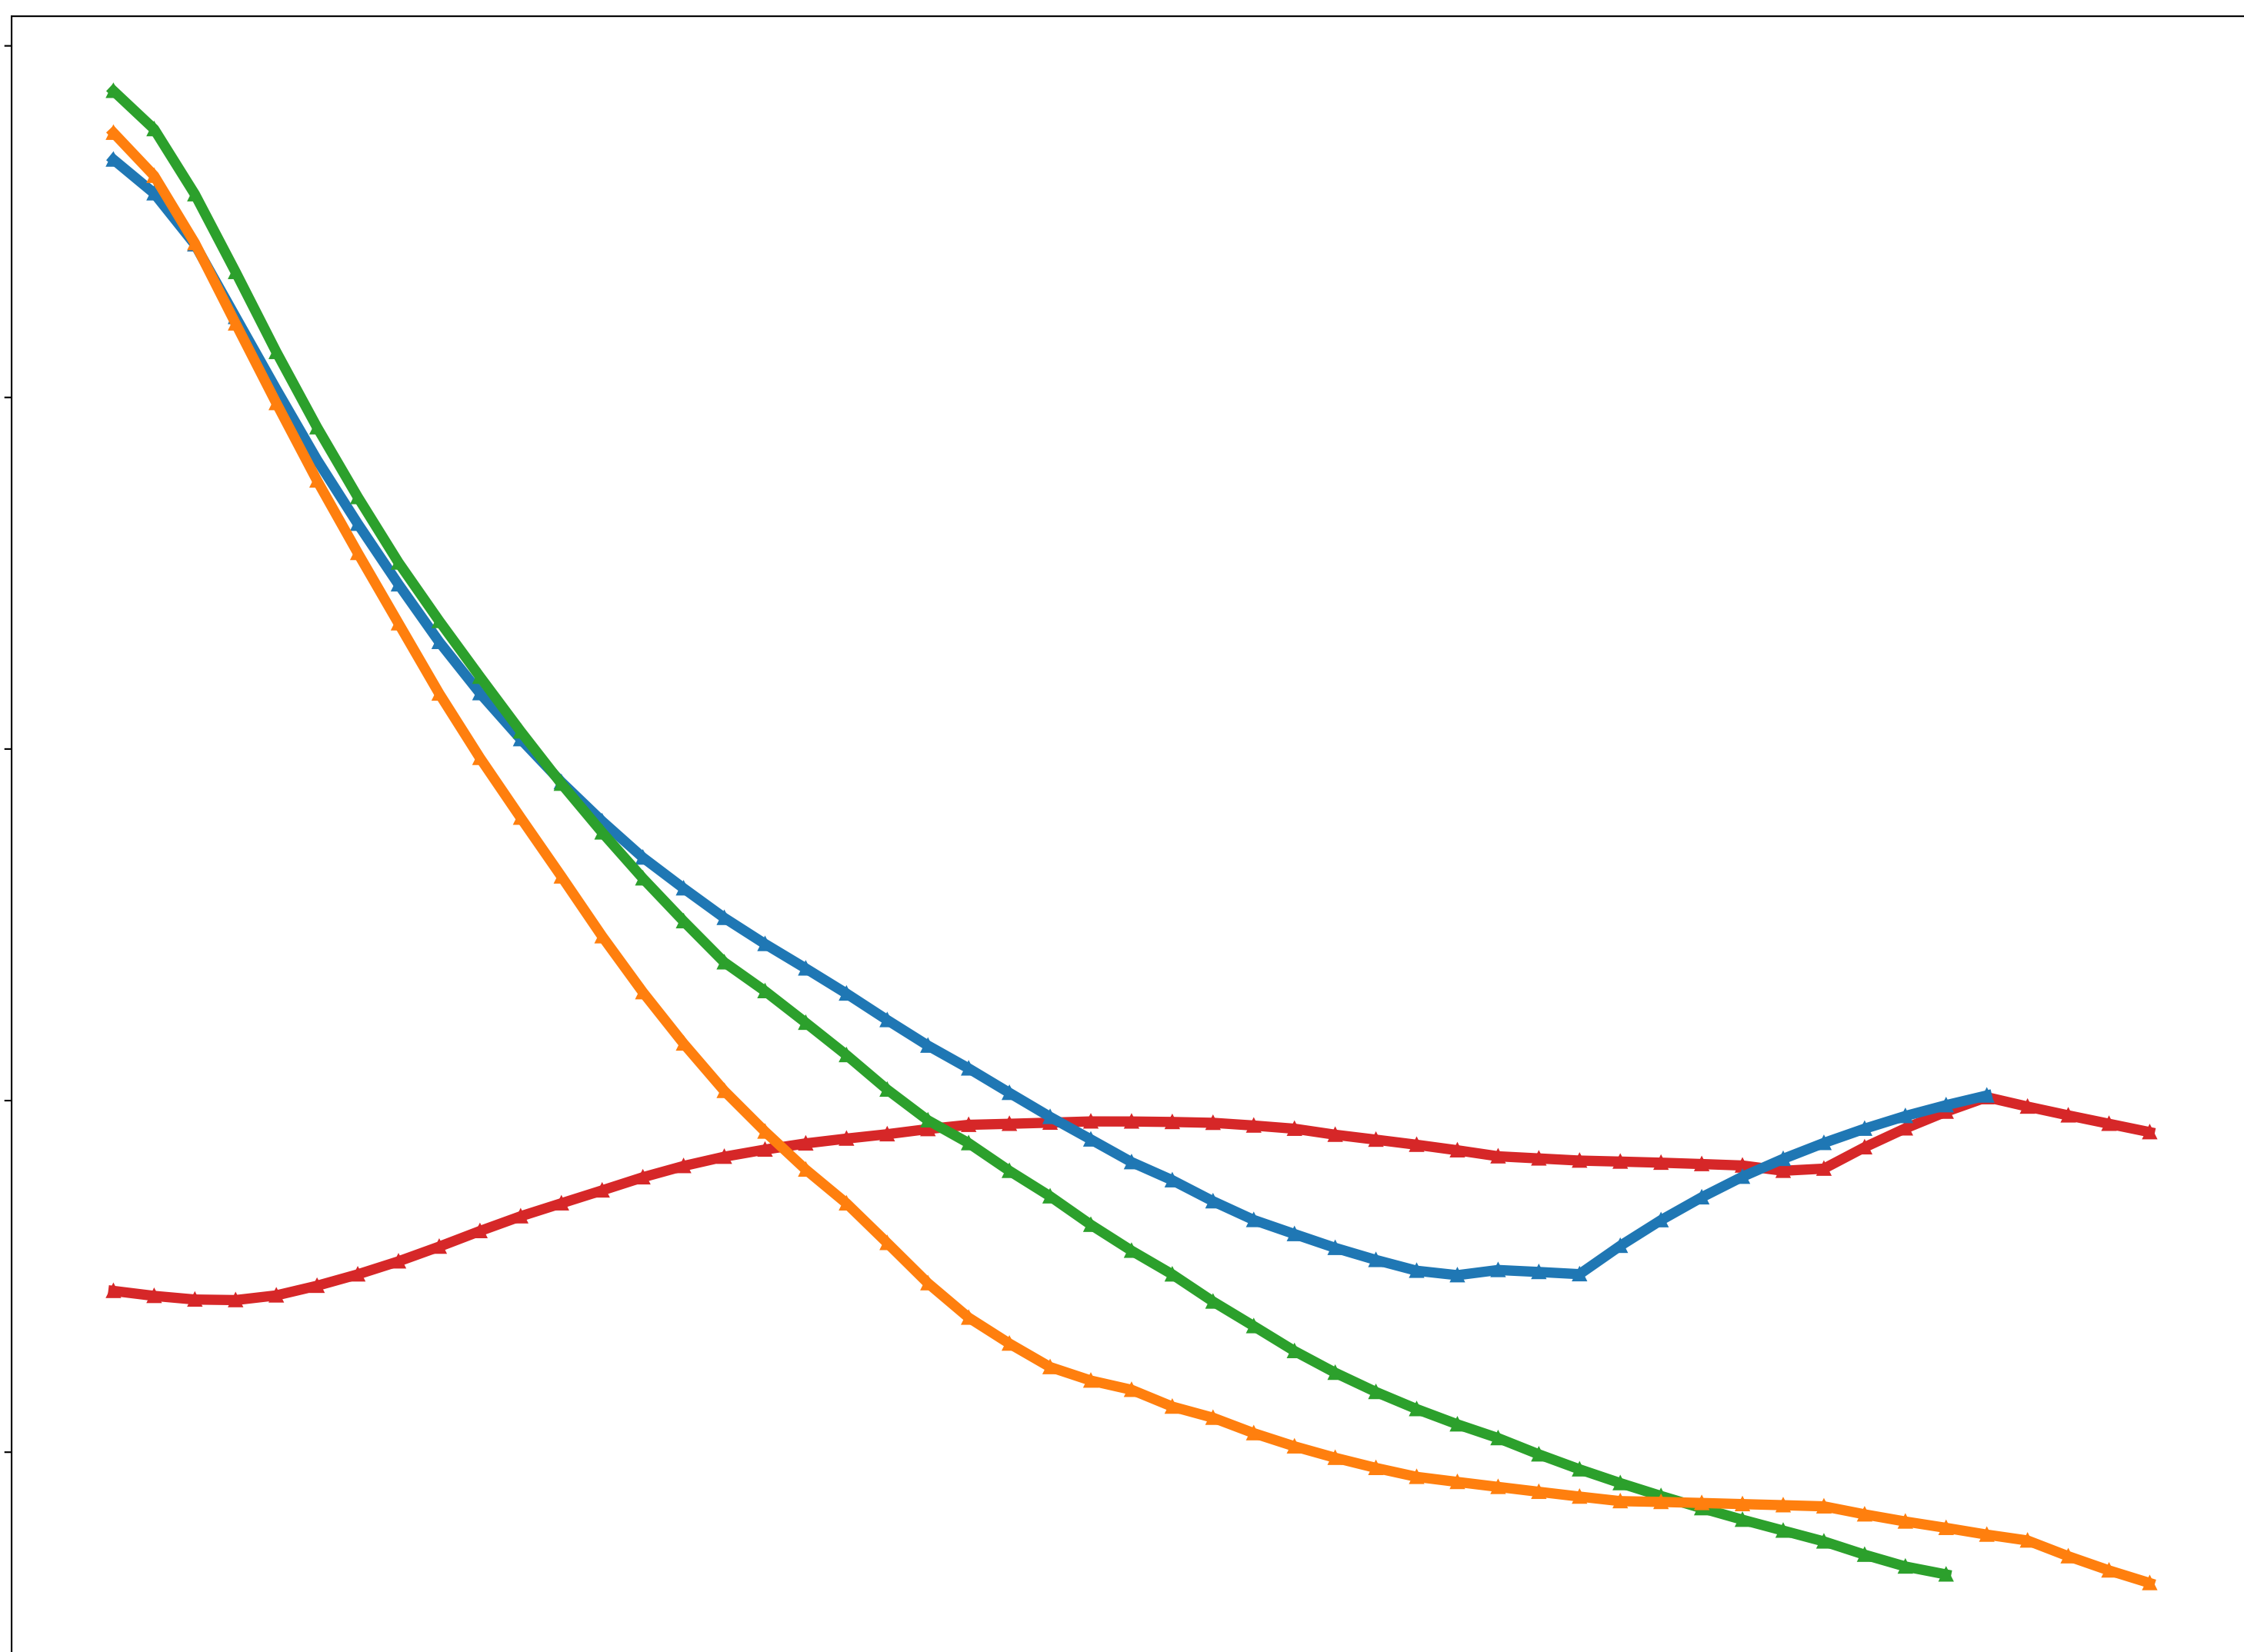

Supplement: supplementary_material [file piecewise_ebf_Llama-3-8B-Instruct_bf_fixed_start.pdf › supplementary_materials/bf_output_dynamic/mmlu/piecewise_ebf_Llama-3-8B-Instruct_bf_fixed_start.pdf]

# Llama-3-8B

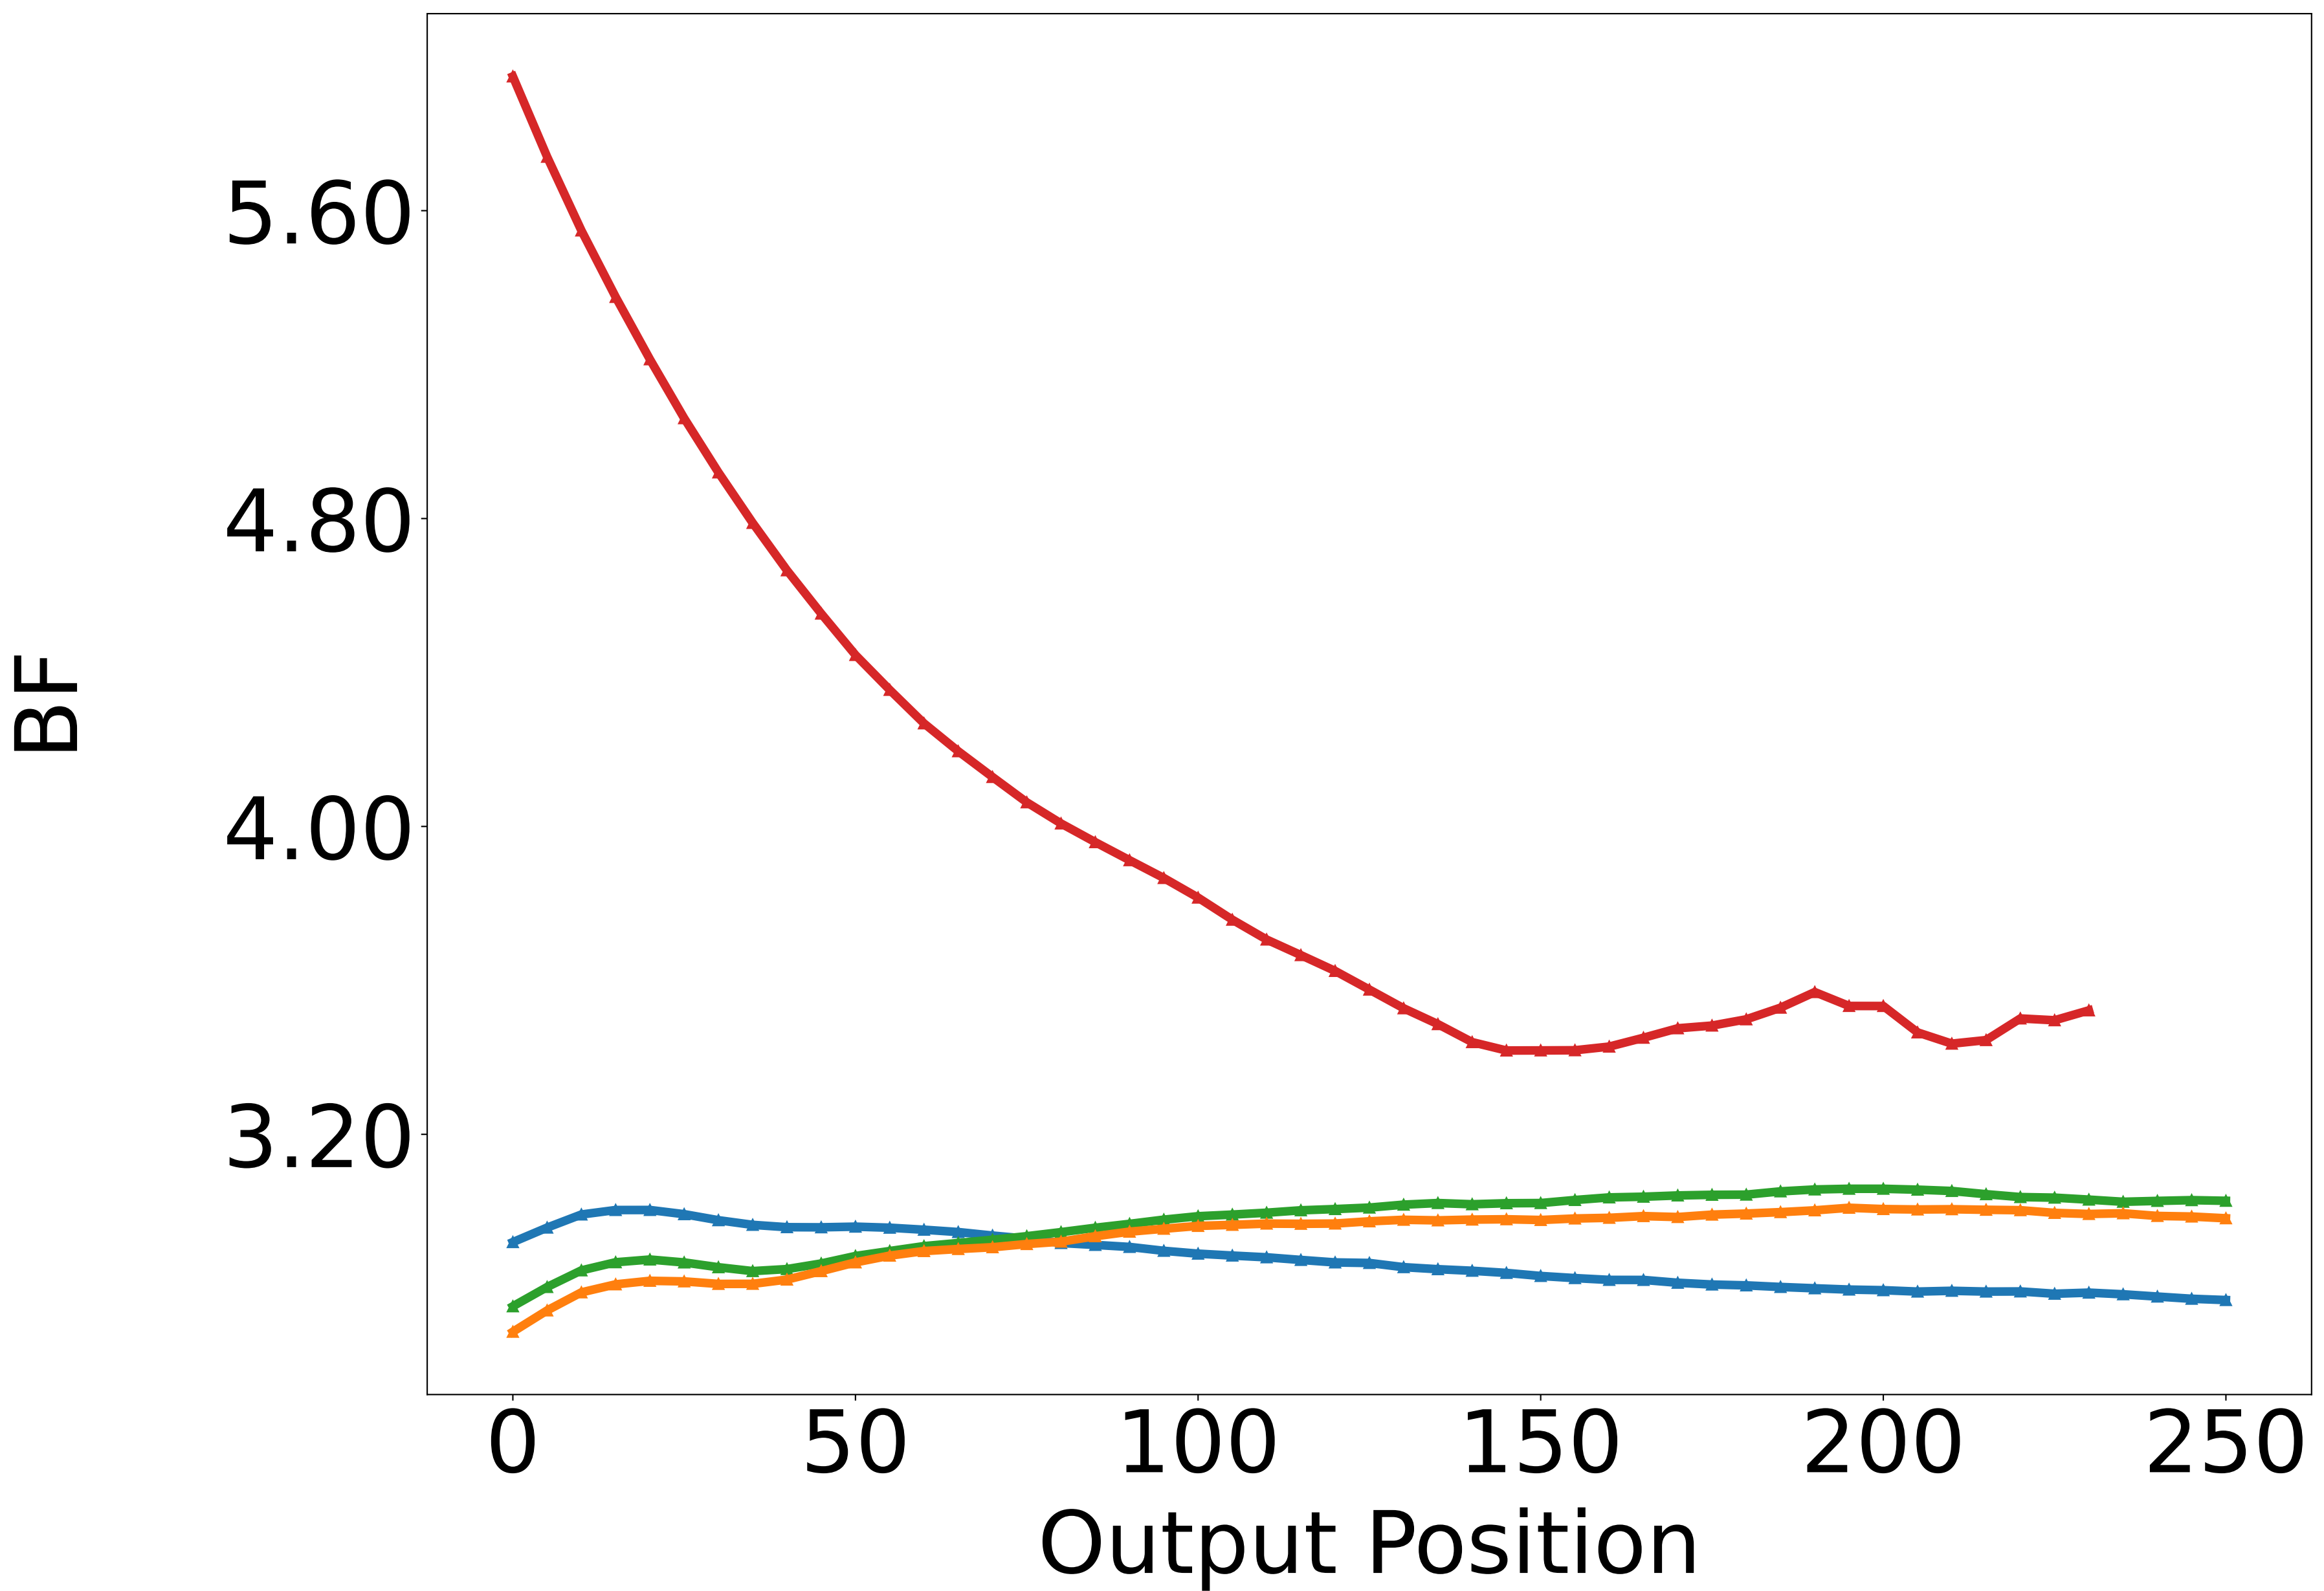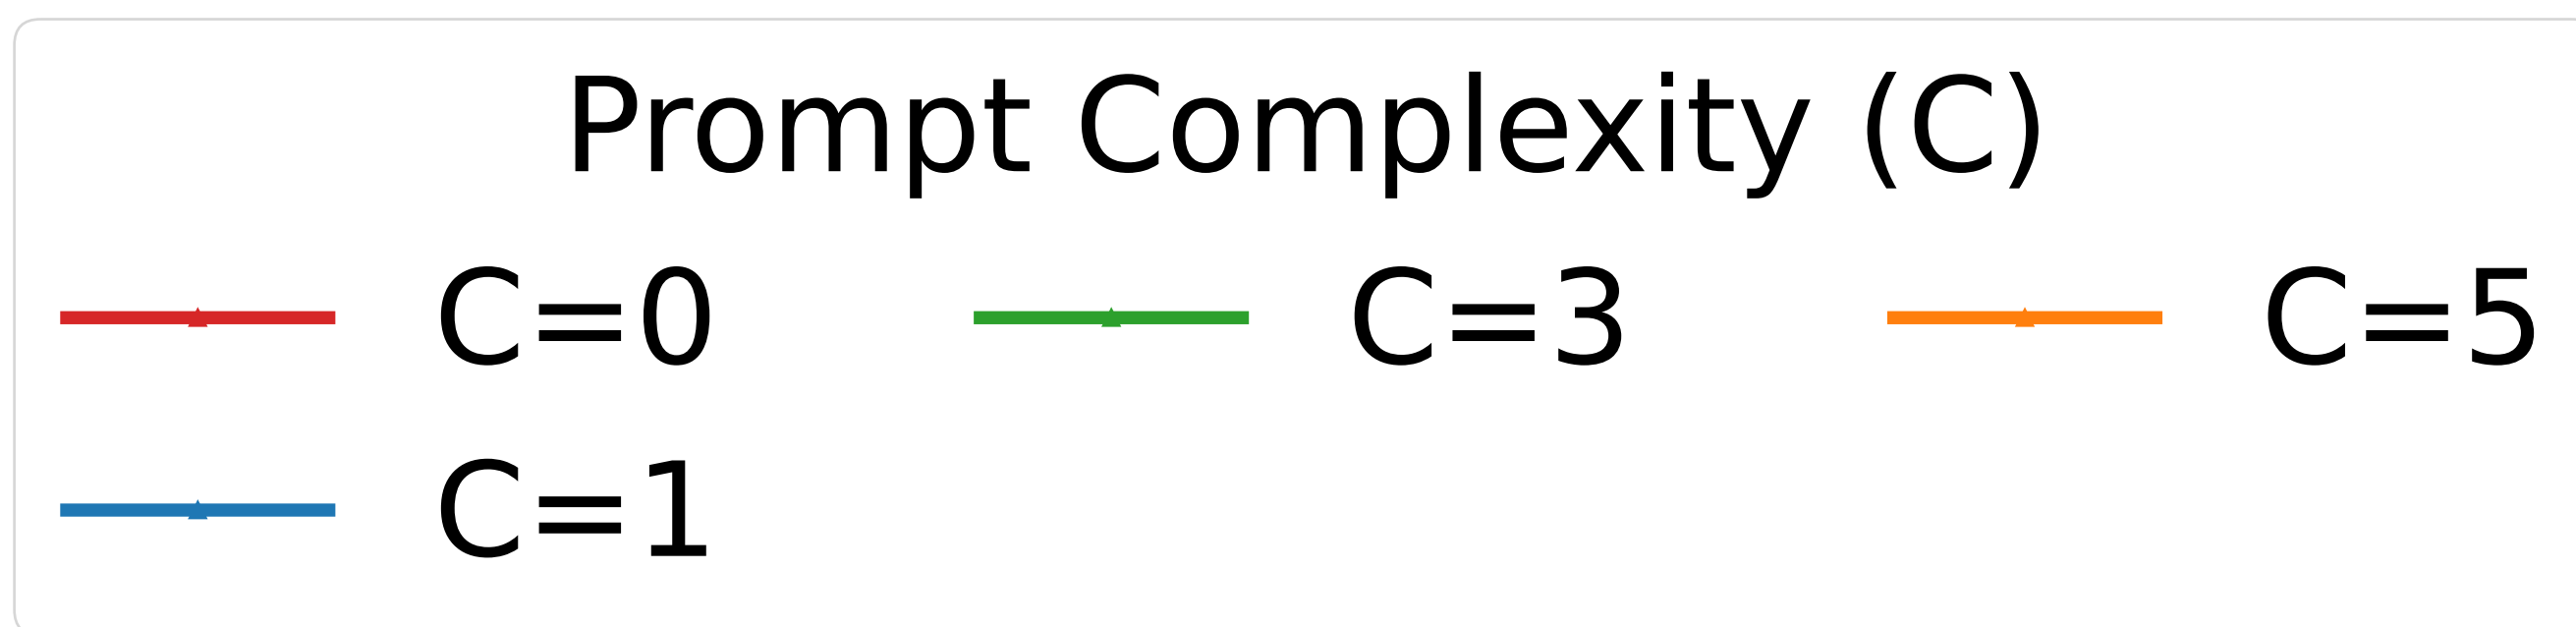

Supplement: supplementary_material [file piecewise_ebf_Llama-3-8B_bf.pdf › supplementary_materials/bf_output_dynamic/mmlu/piecewise_ebf_Llama-3-8B_bf.pdf]

# Llama-3-8B

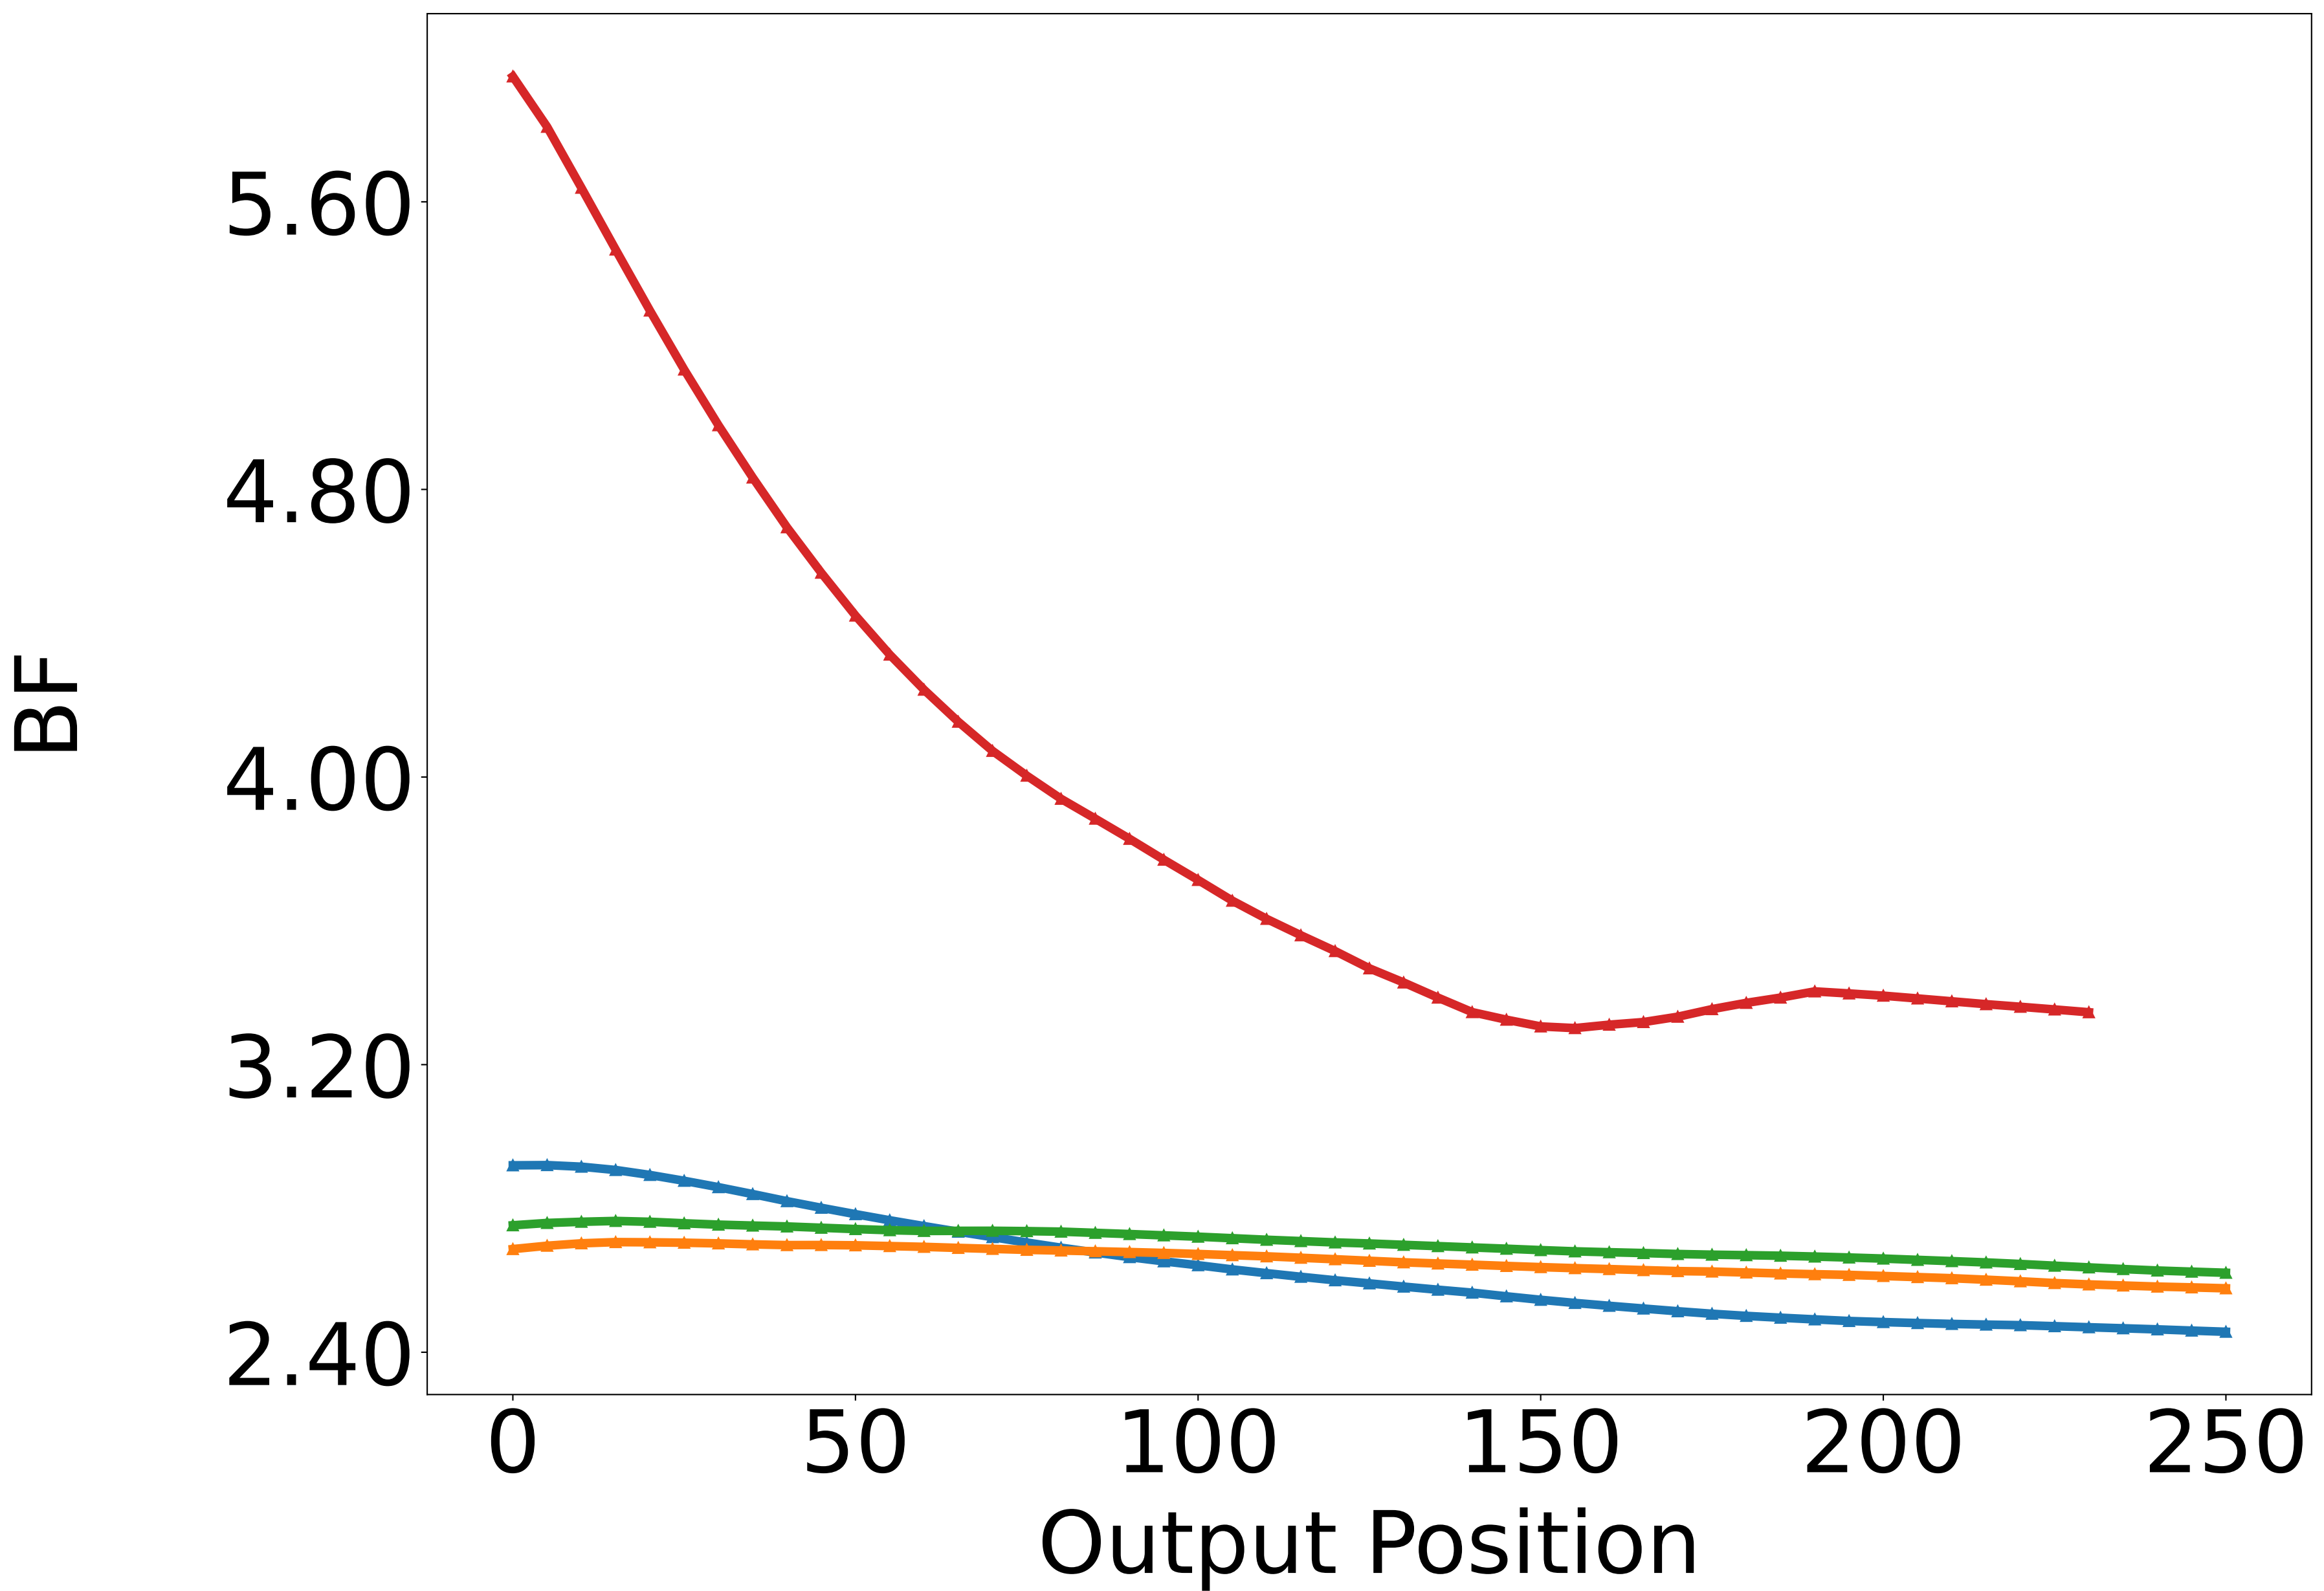

Prompt Complexity (C)

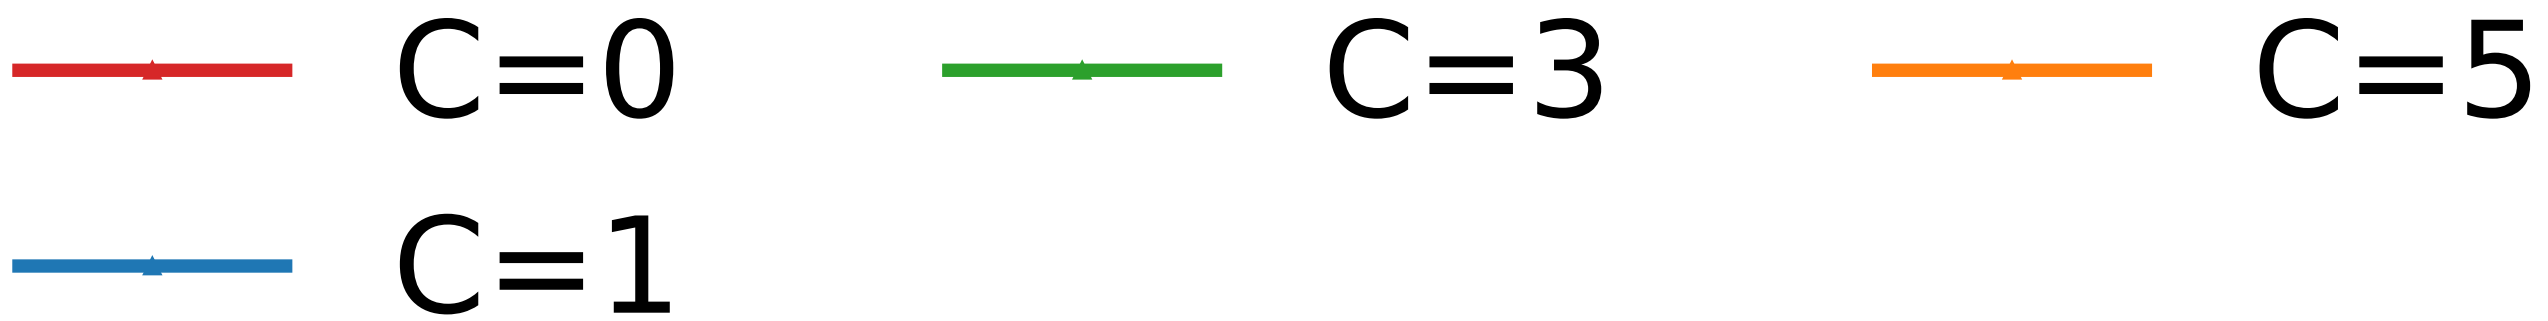

Supplement: supplementary_material [file piecewise_ebf_Llama-3-8B_bf_fixed_start.pdf › supplementary_materials/bf_output_dynamic/mmlu/piecewise_ebf_Llama-3-8B_bf_fixed_start.pdf]

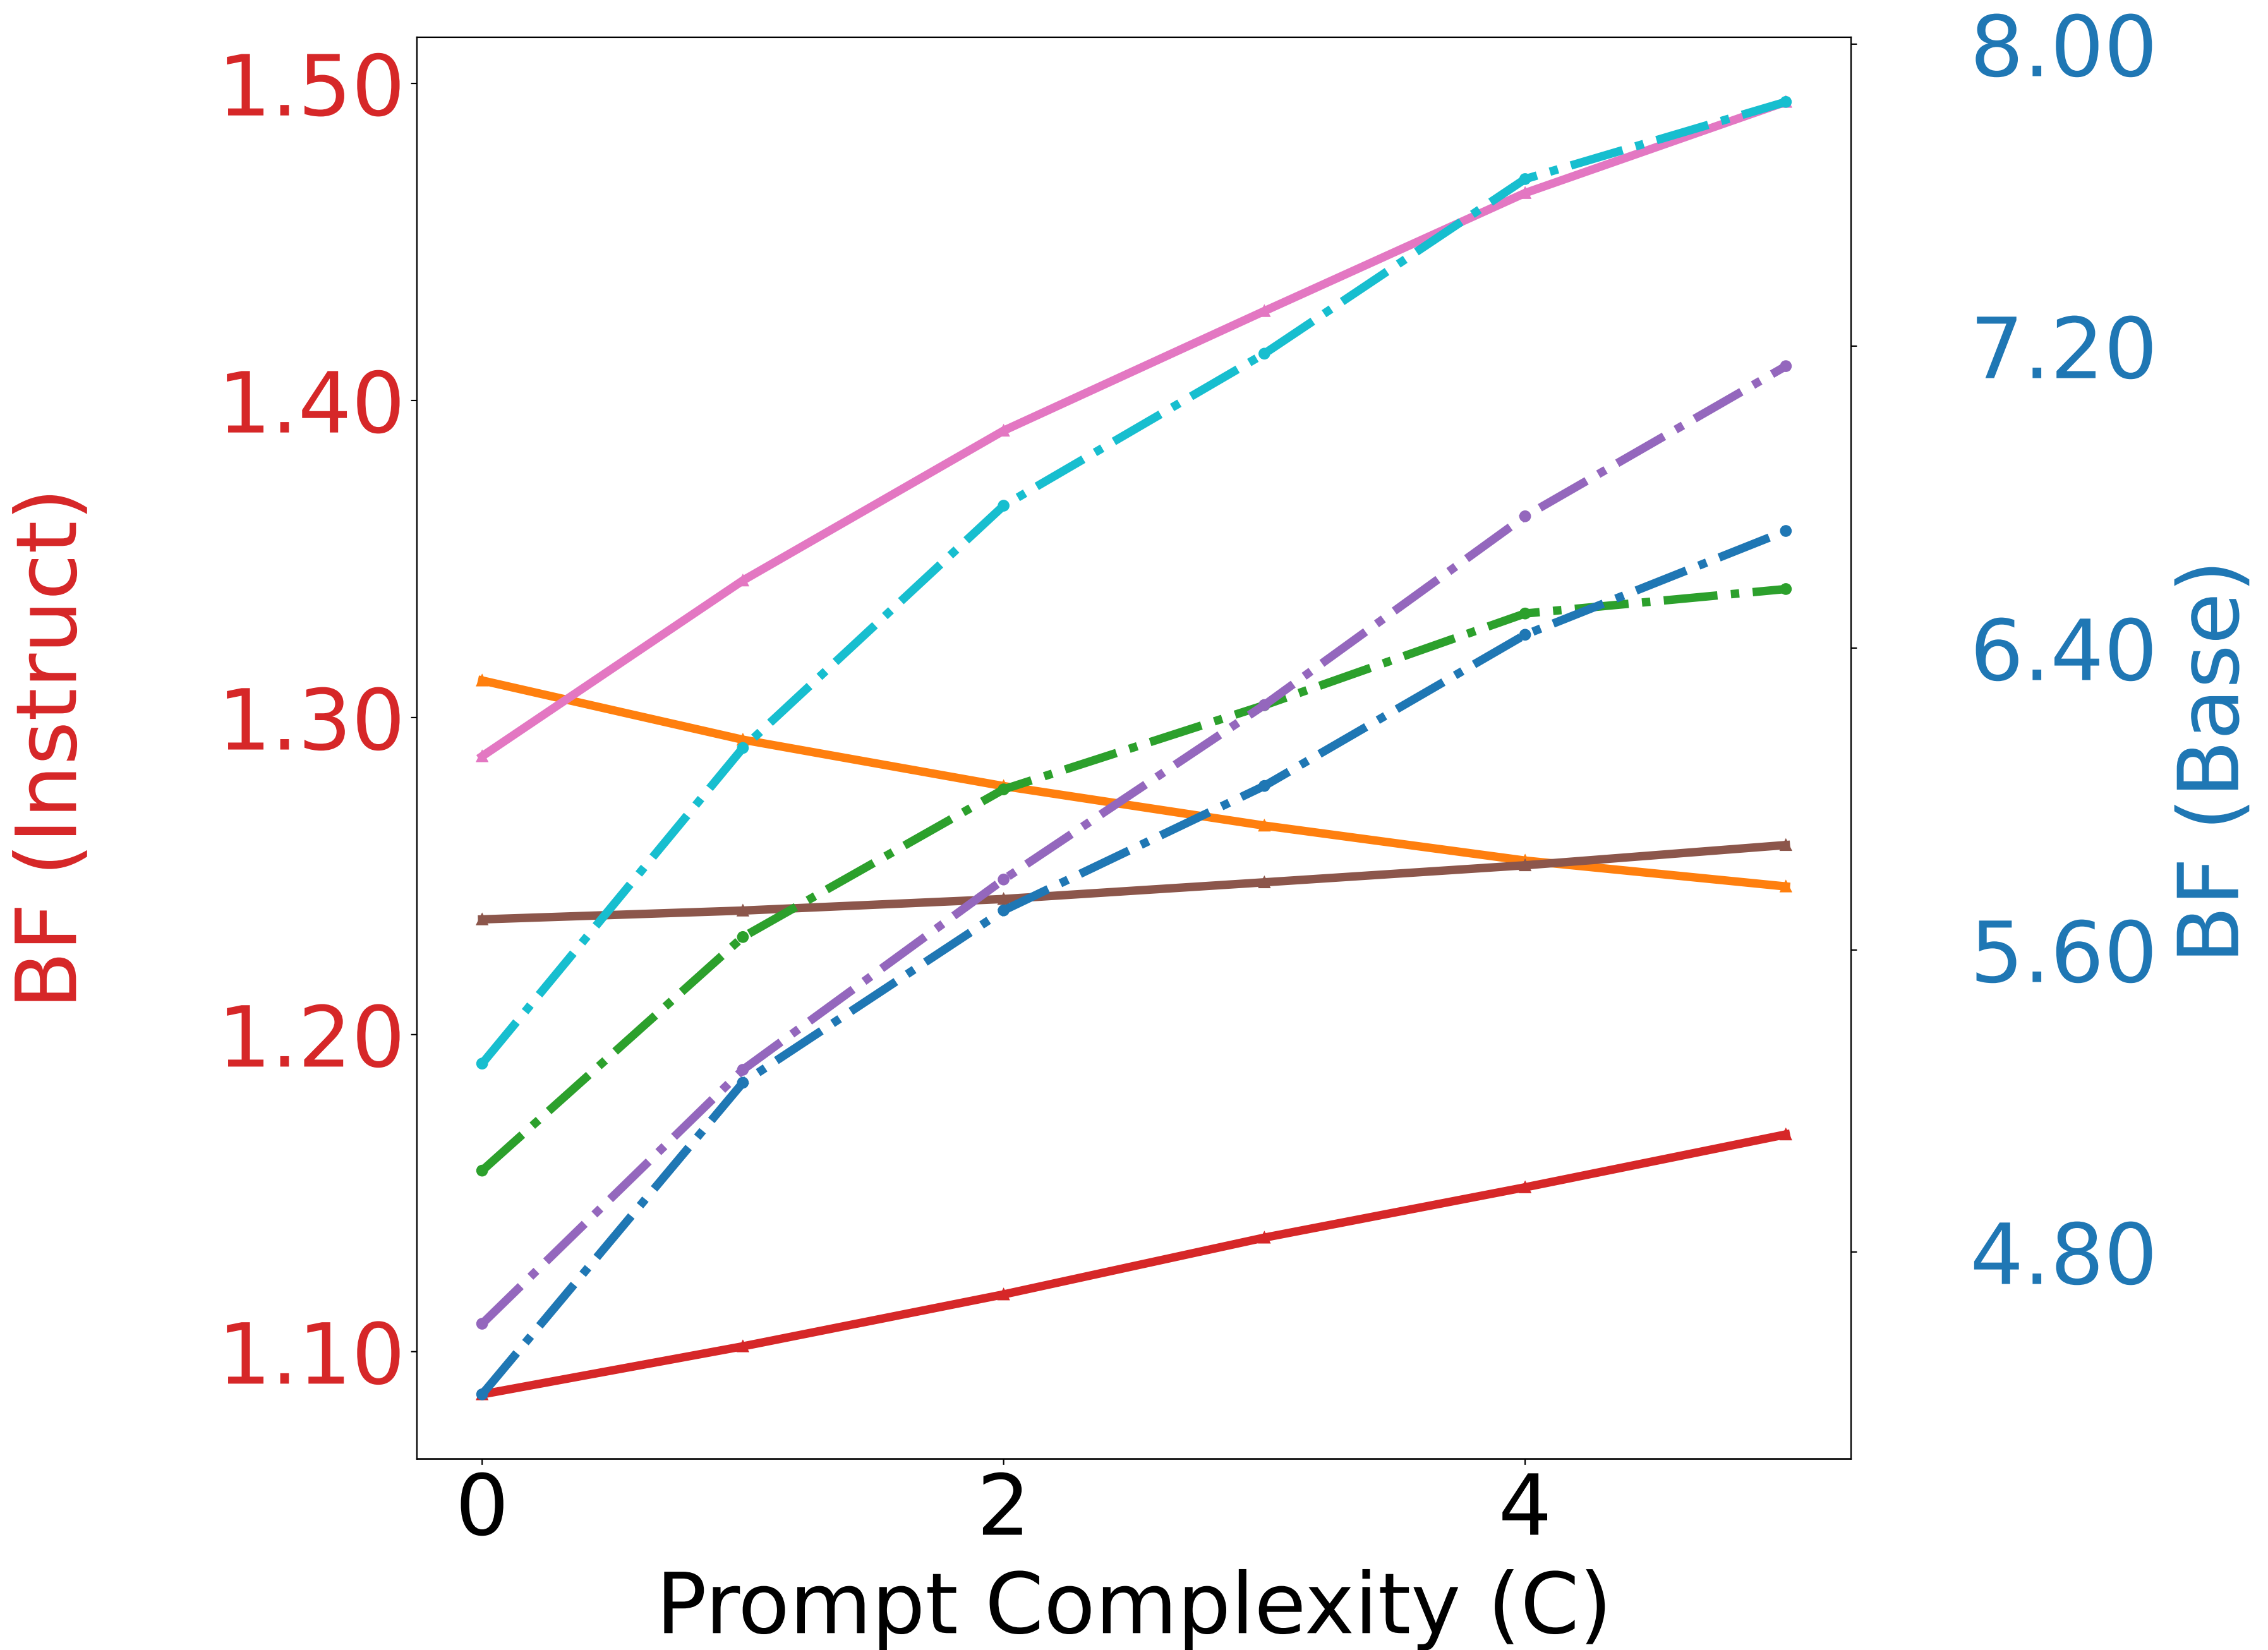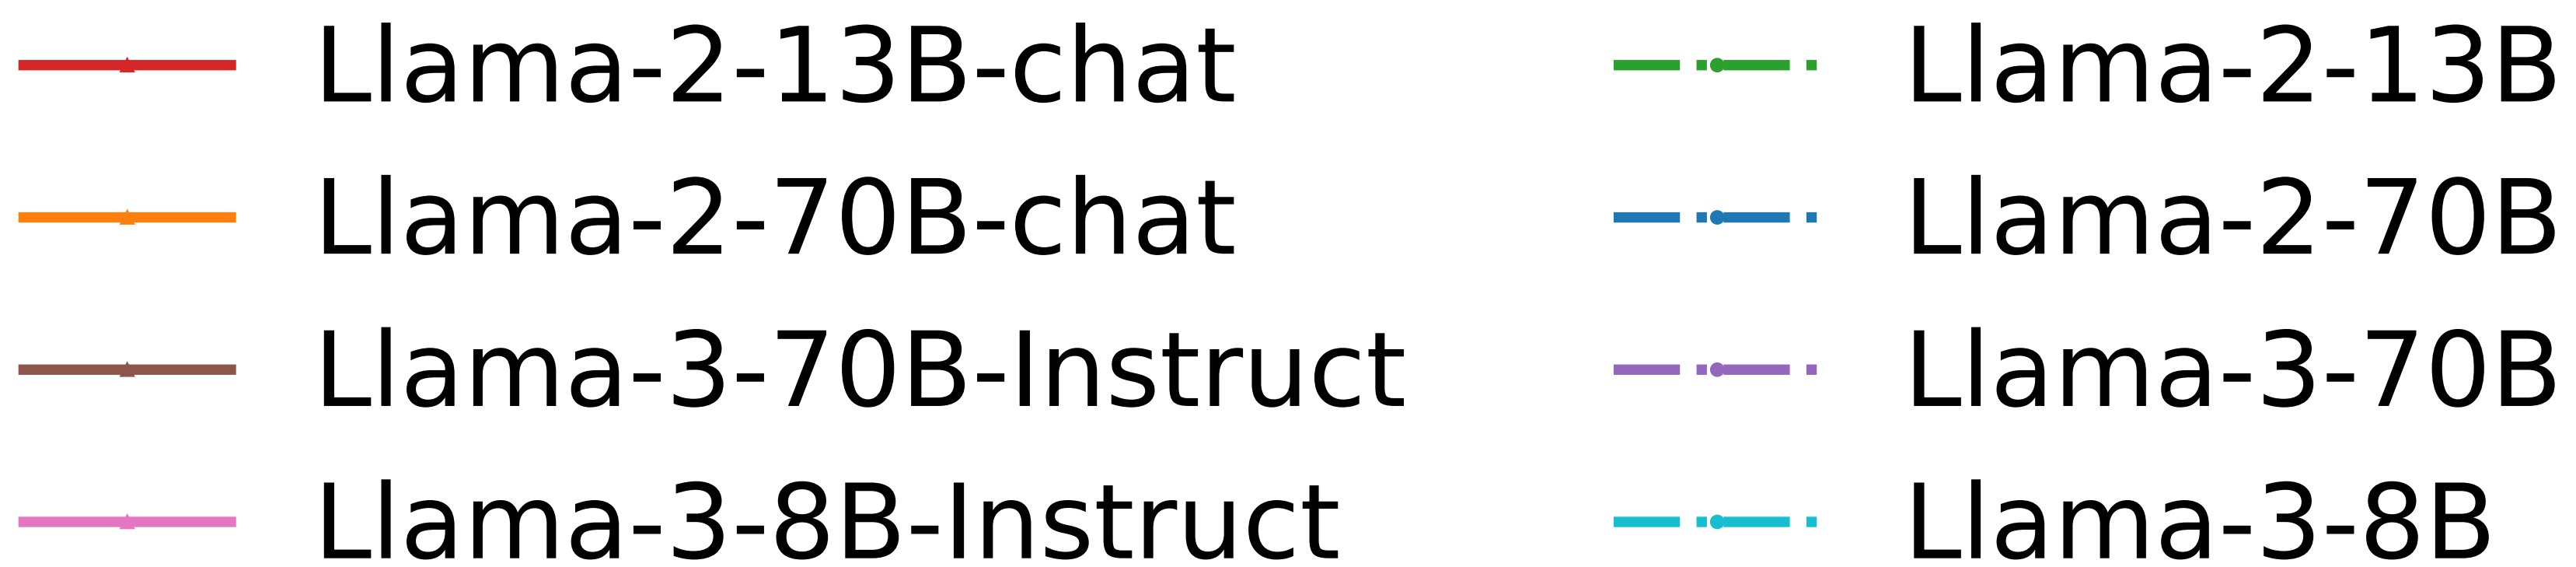

Supplement: supplementary_material [file model_wise_comparison_ebf_bf.pdf › supplementary_materials/bf_output_dynamic/random_strings/model_wise_comparison_ebf_bf.pdf]

# Llama-2-13B-chat

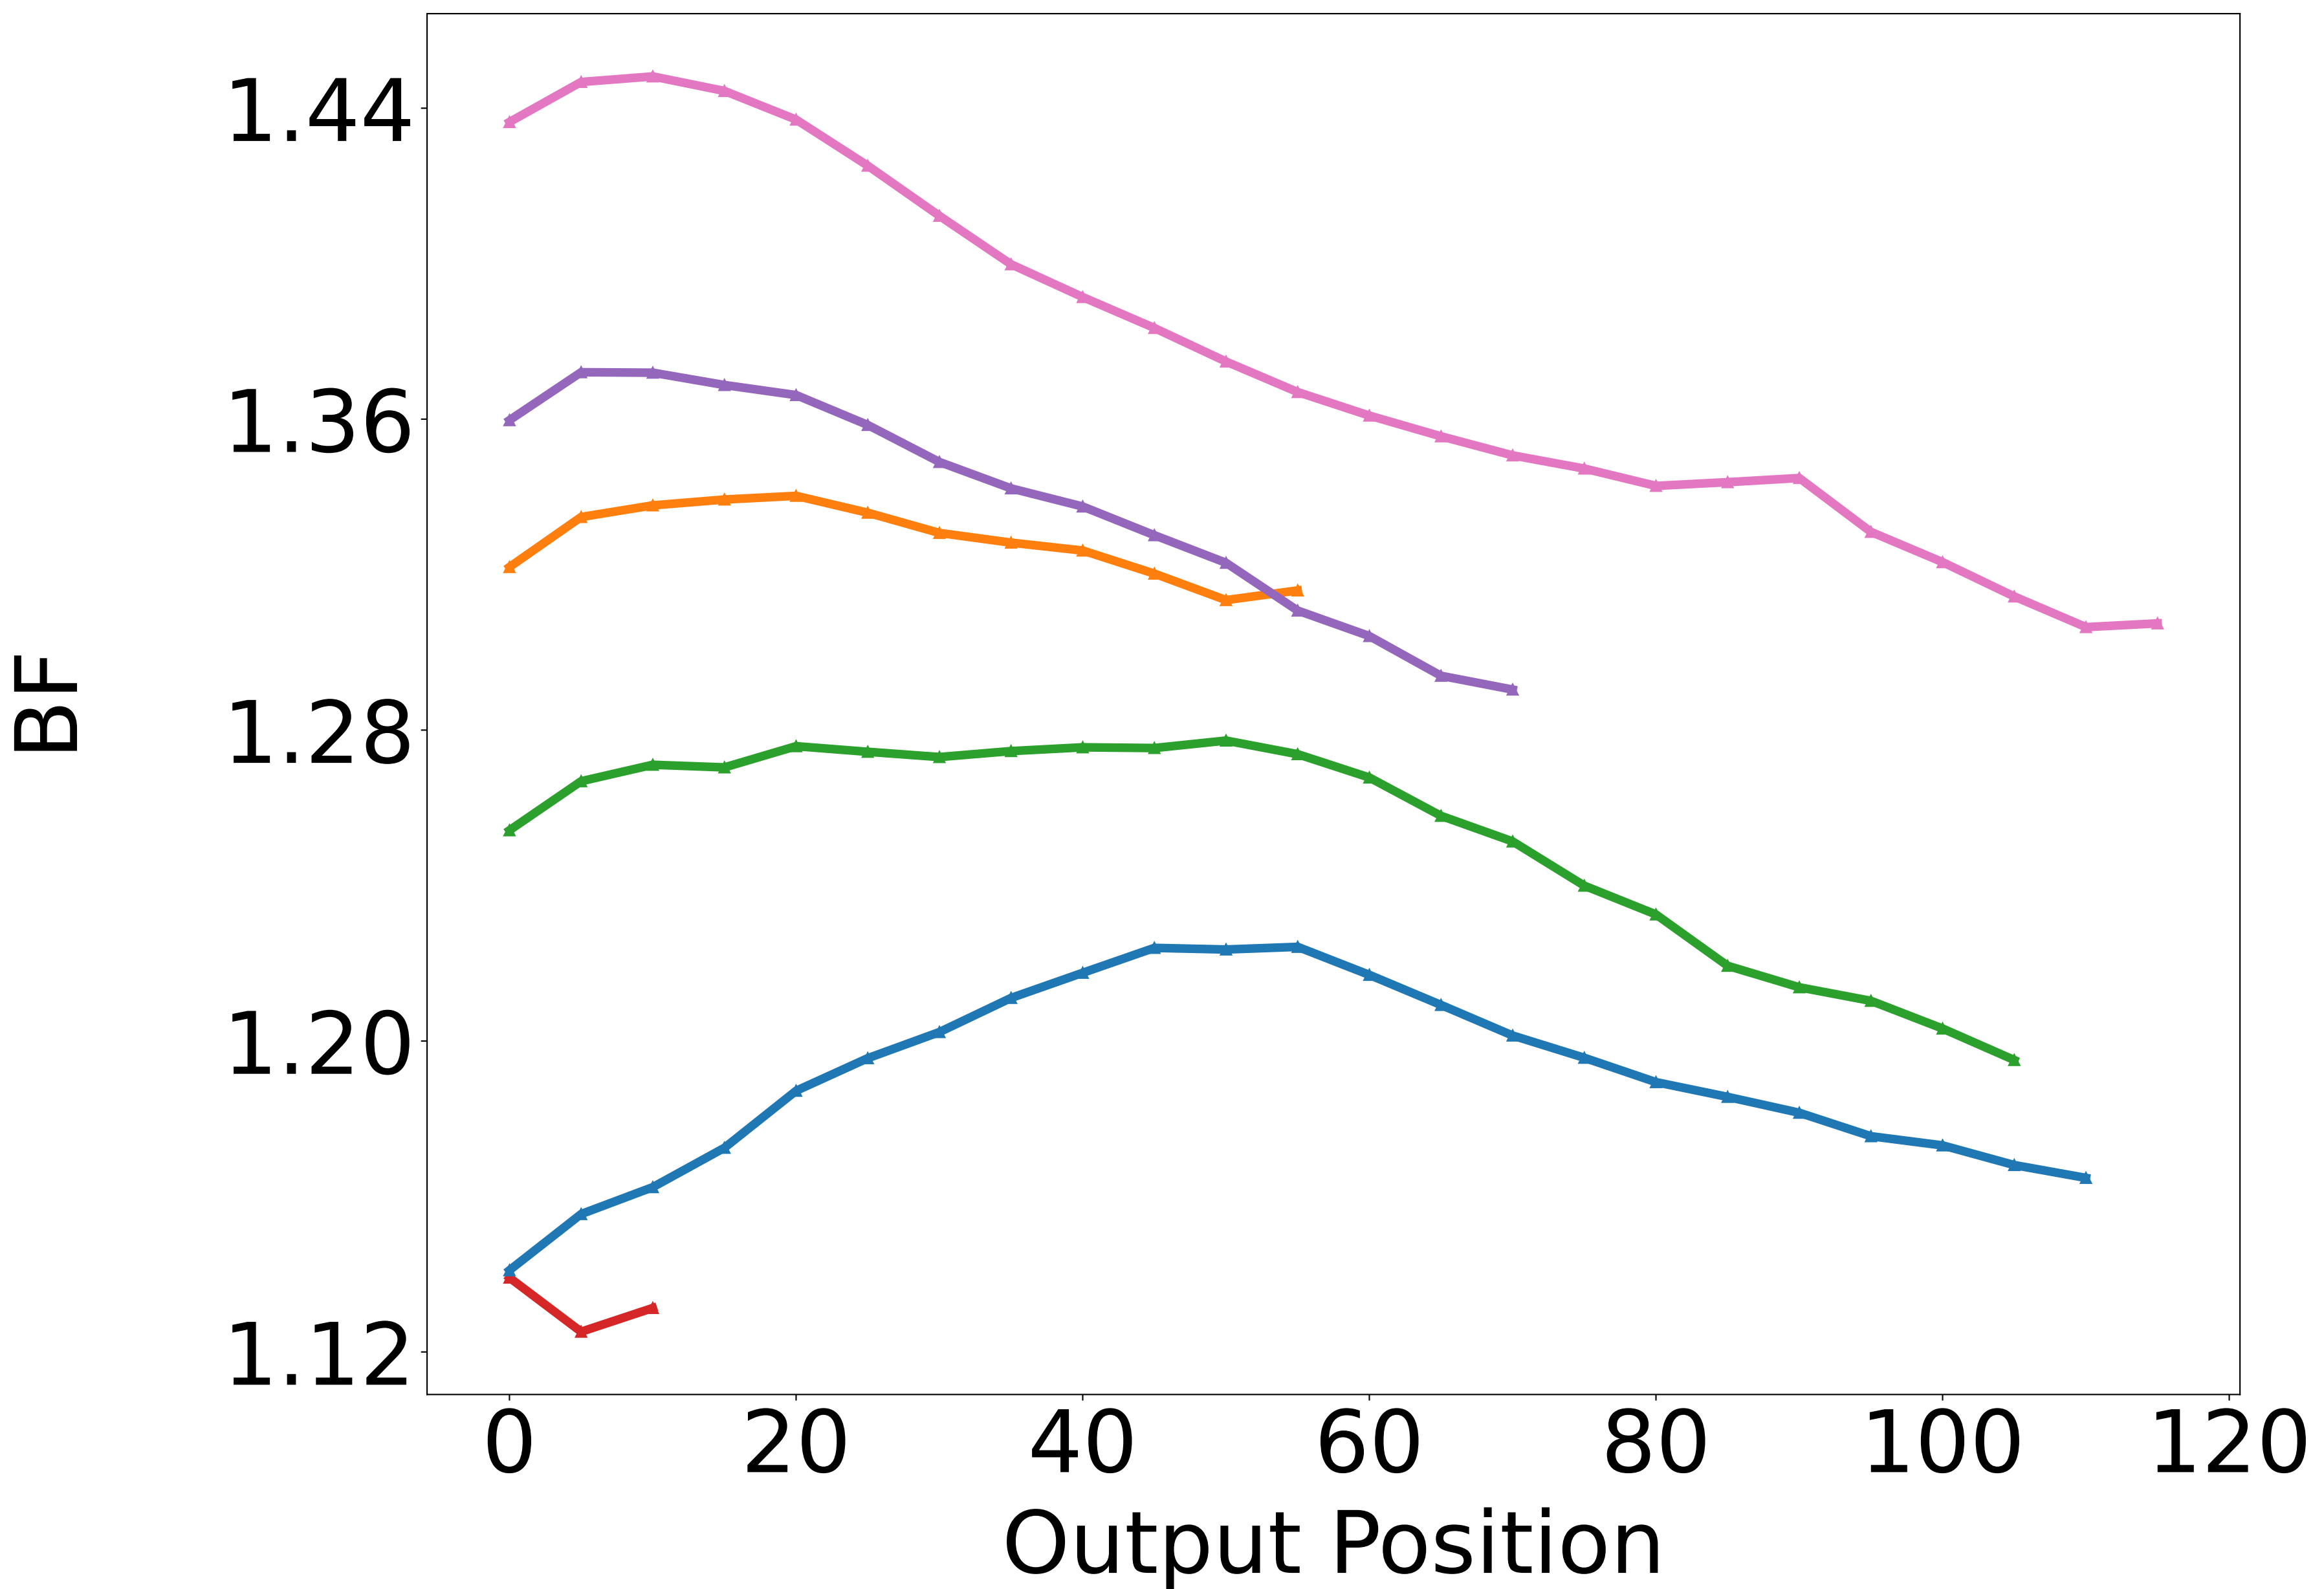

## Prompt Complexity (C)

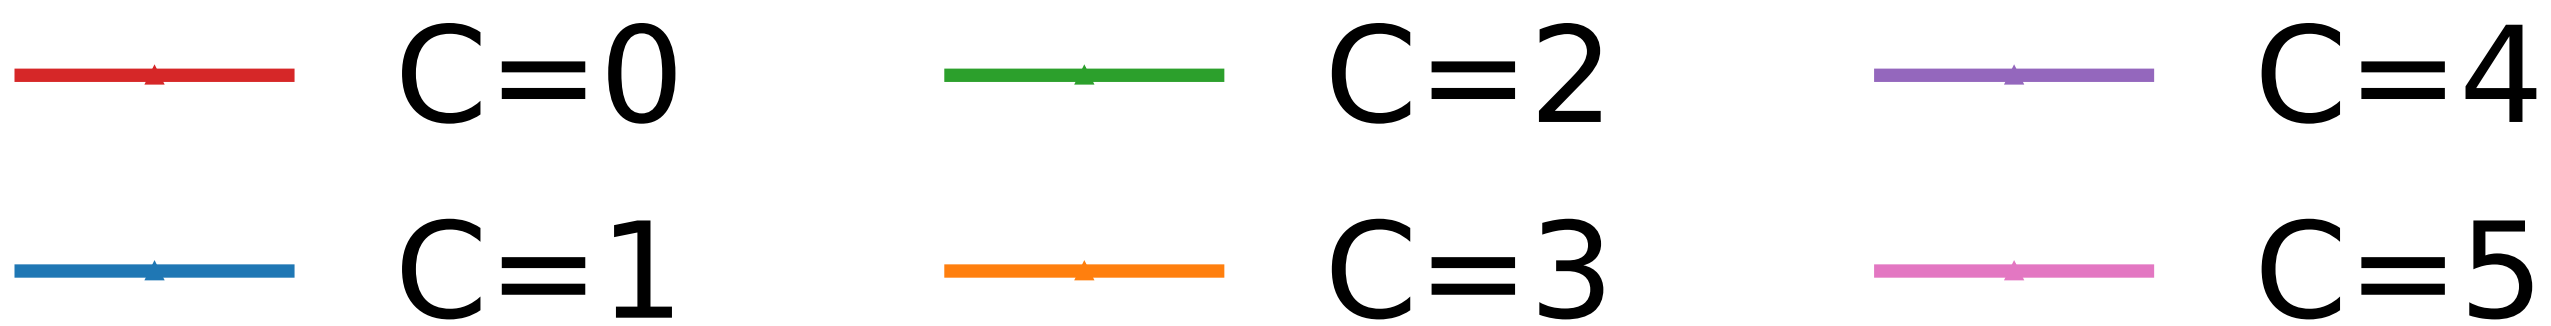

Supplement: supplementary_material [file piecewise_ebf_Llama-2-13B-chat_bf.pdf › supplementary_materials/bf_output_dynamic/random_strings/piecewise_ebf_Llama-2-13B-chat_bf.pdf]

# Llama-2-13B

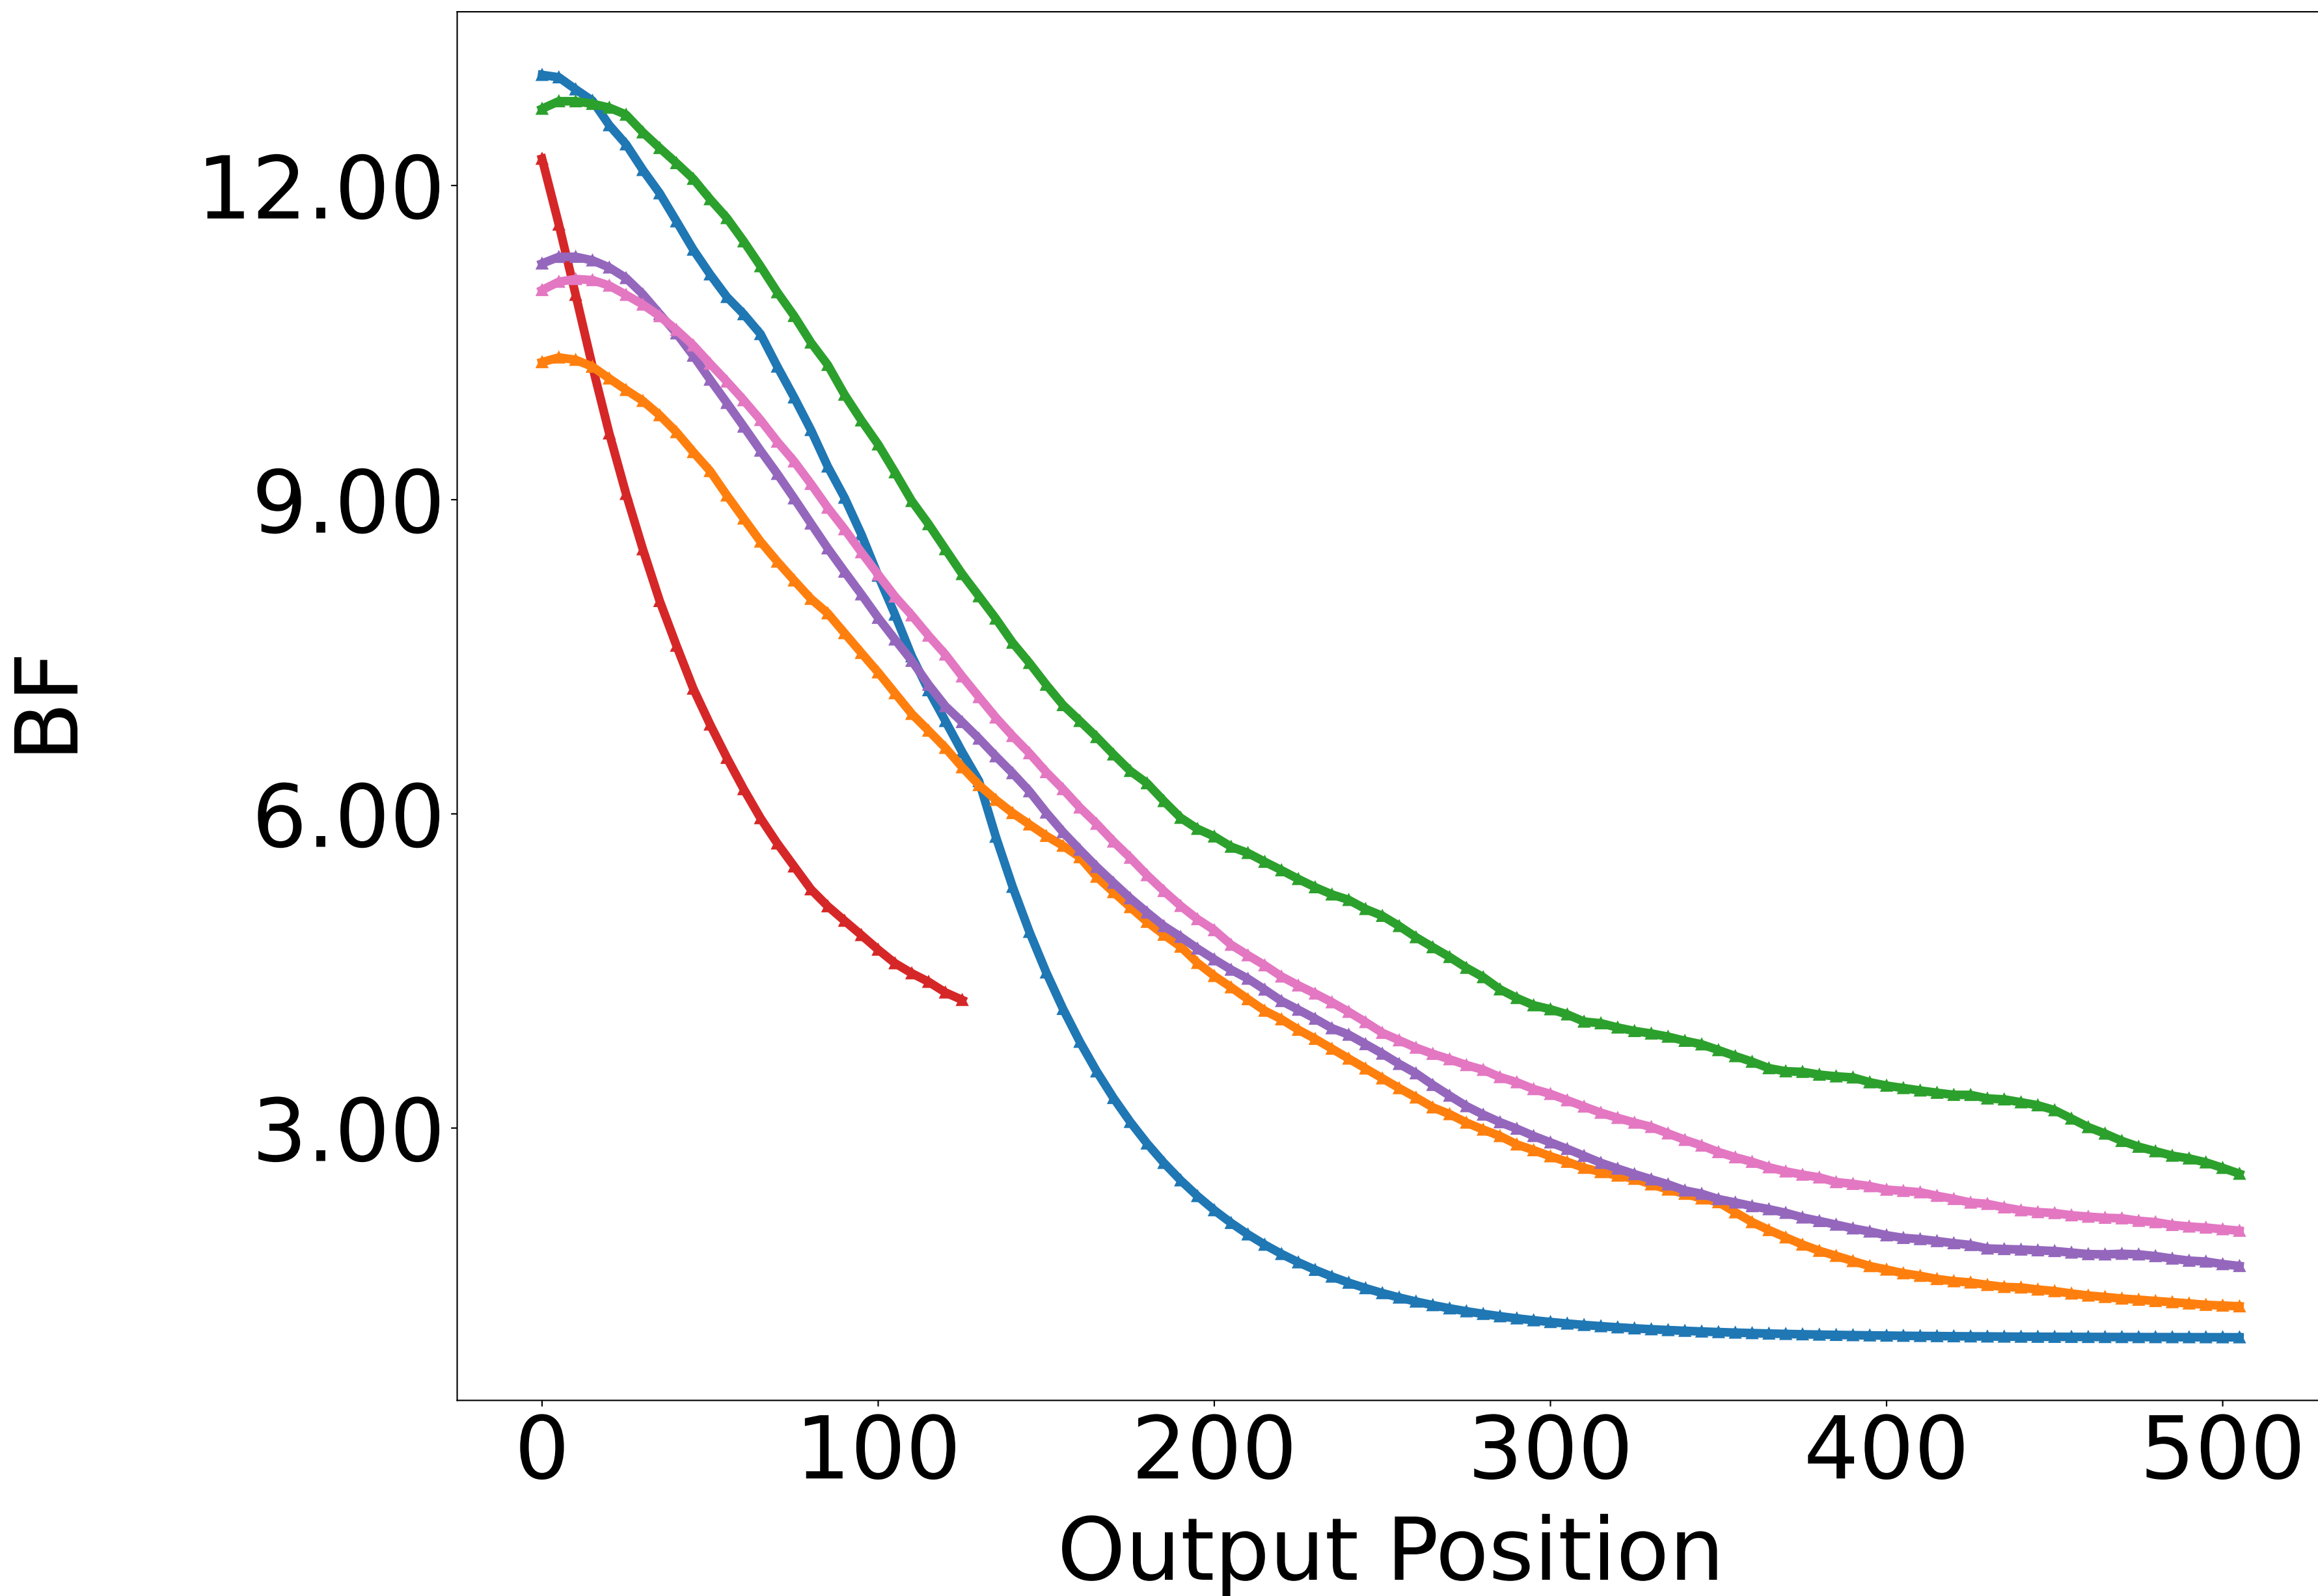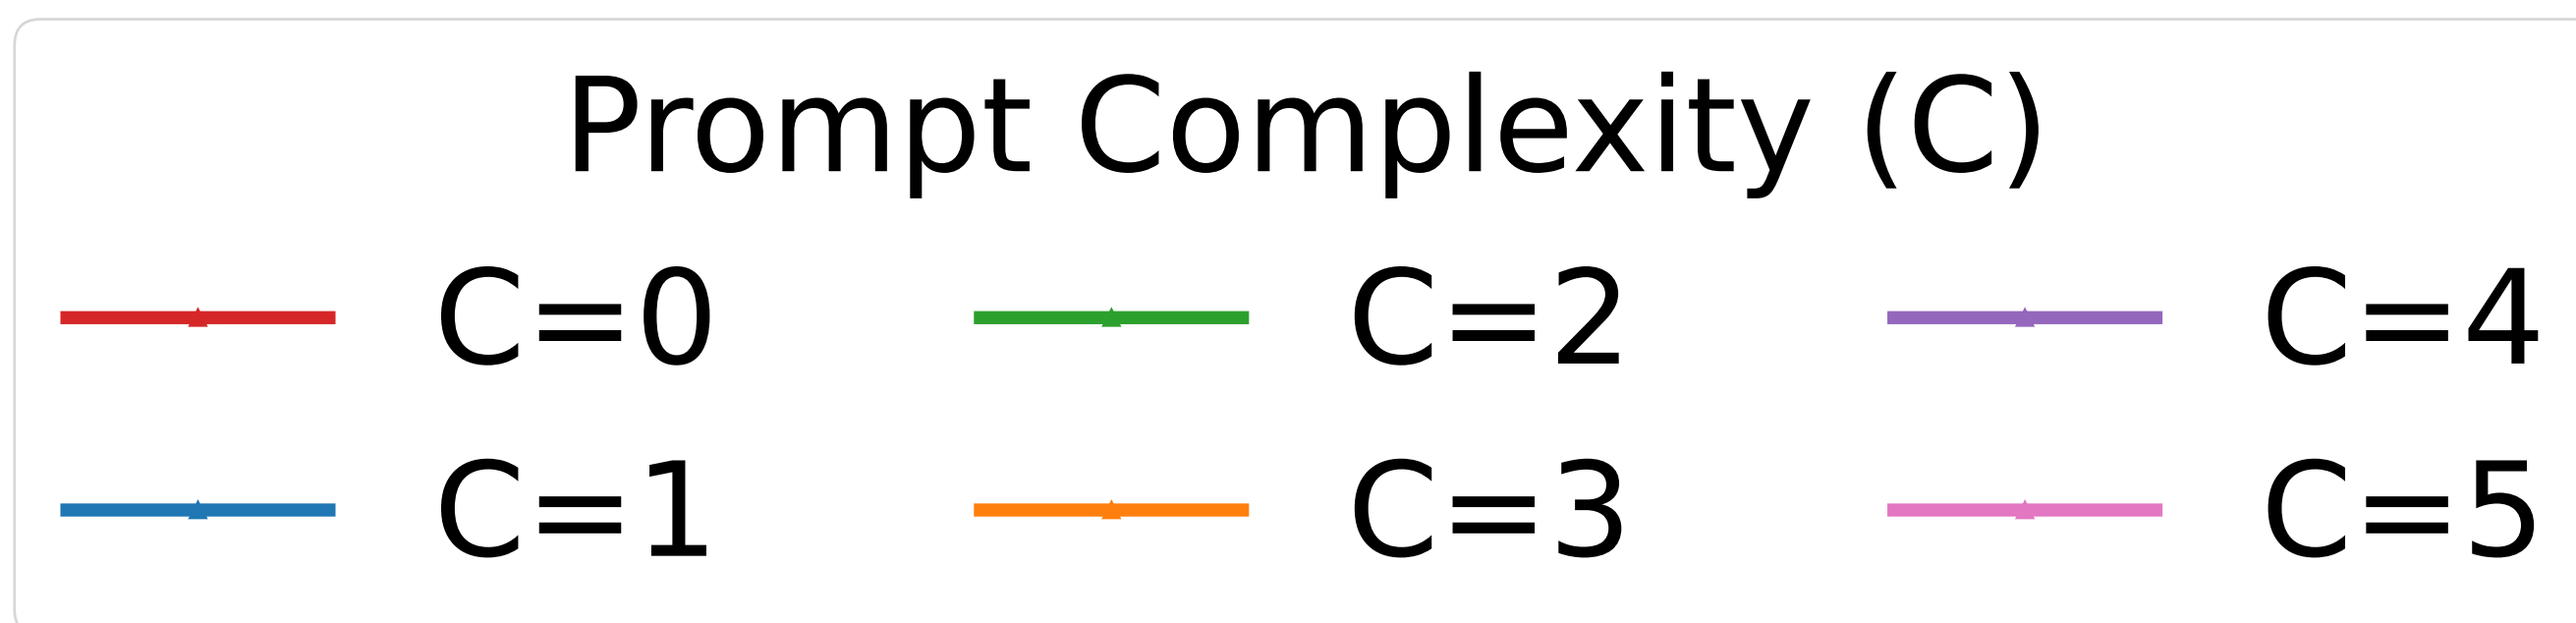

Supplement: supplementary_material [file piecewise_ebf_Llama-2-13B_bf.pdf › supplementary_materials/bf_output_dynamic/random_strings/piecewise_ebf_Llama-2-13B_bf.pdf]

# Llama-2-70B-chat

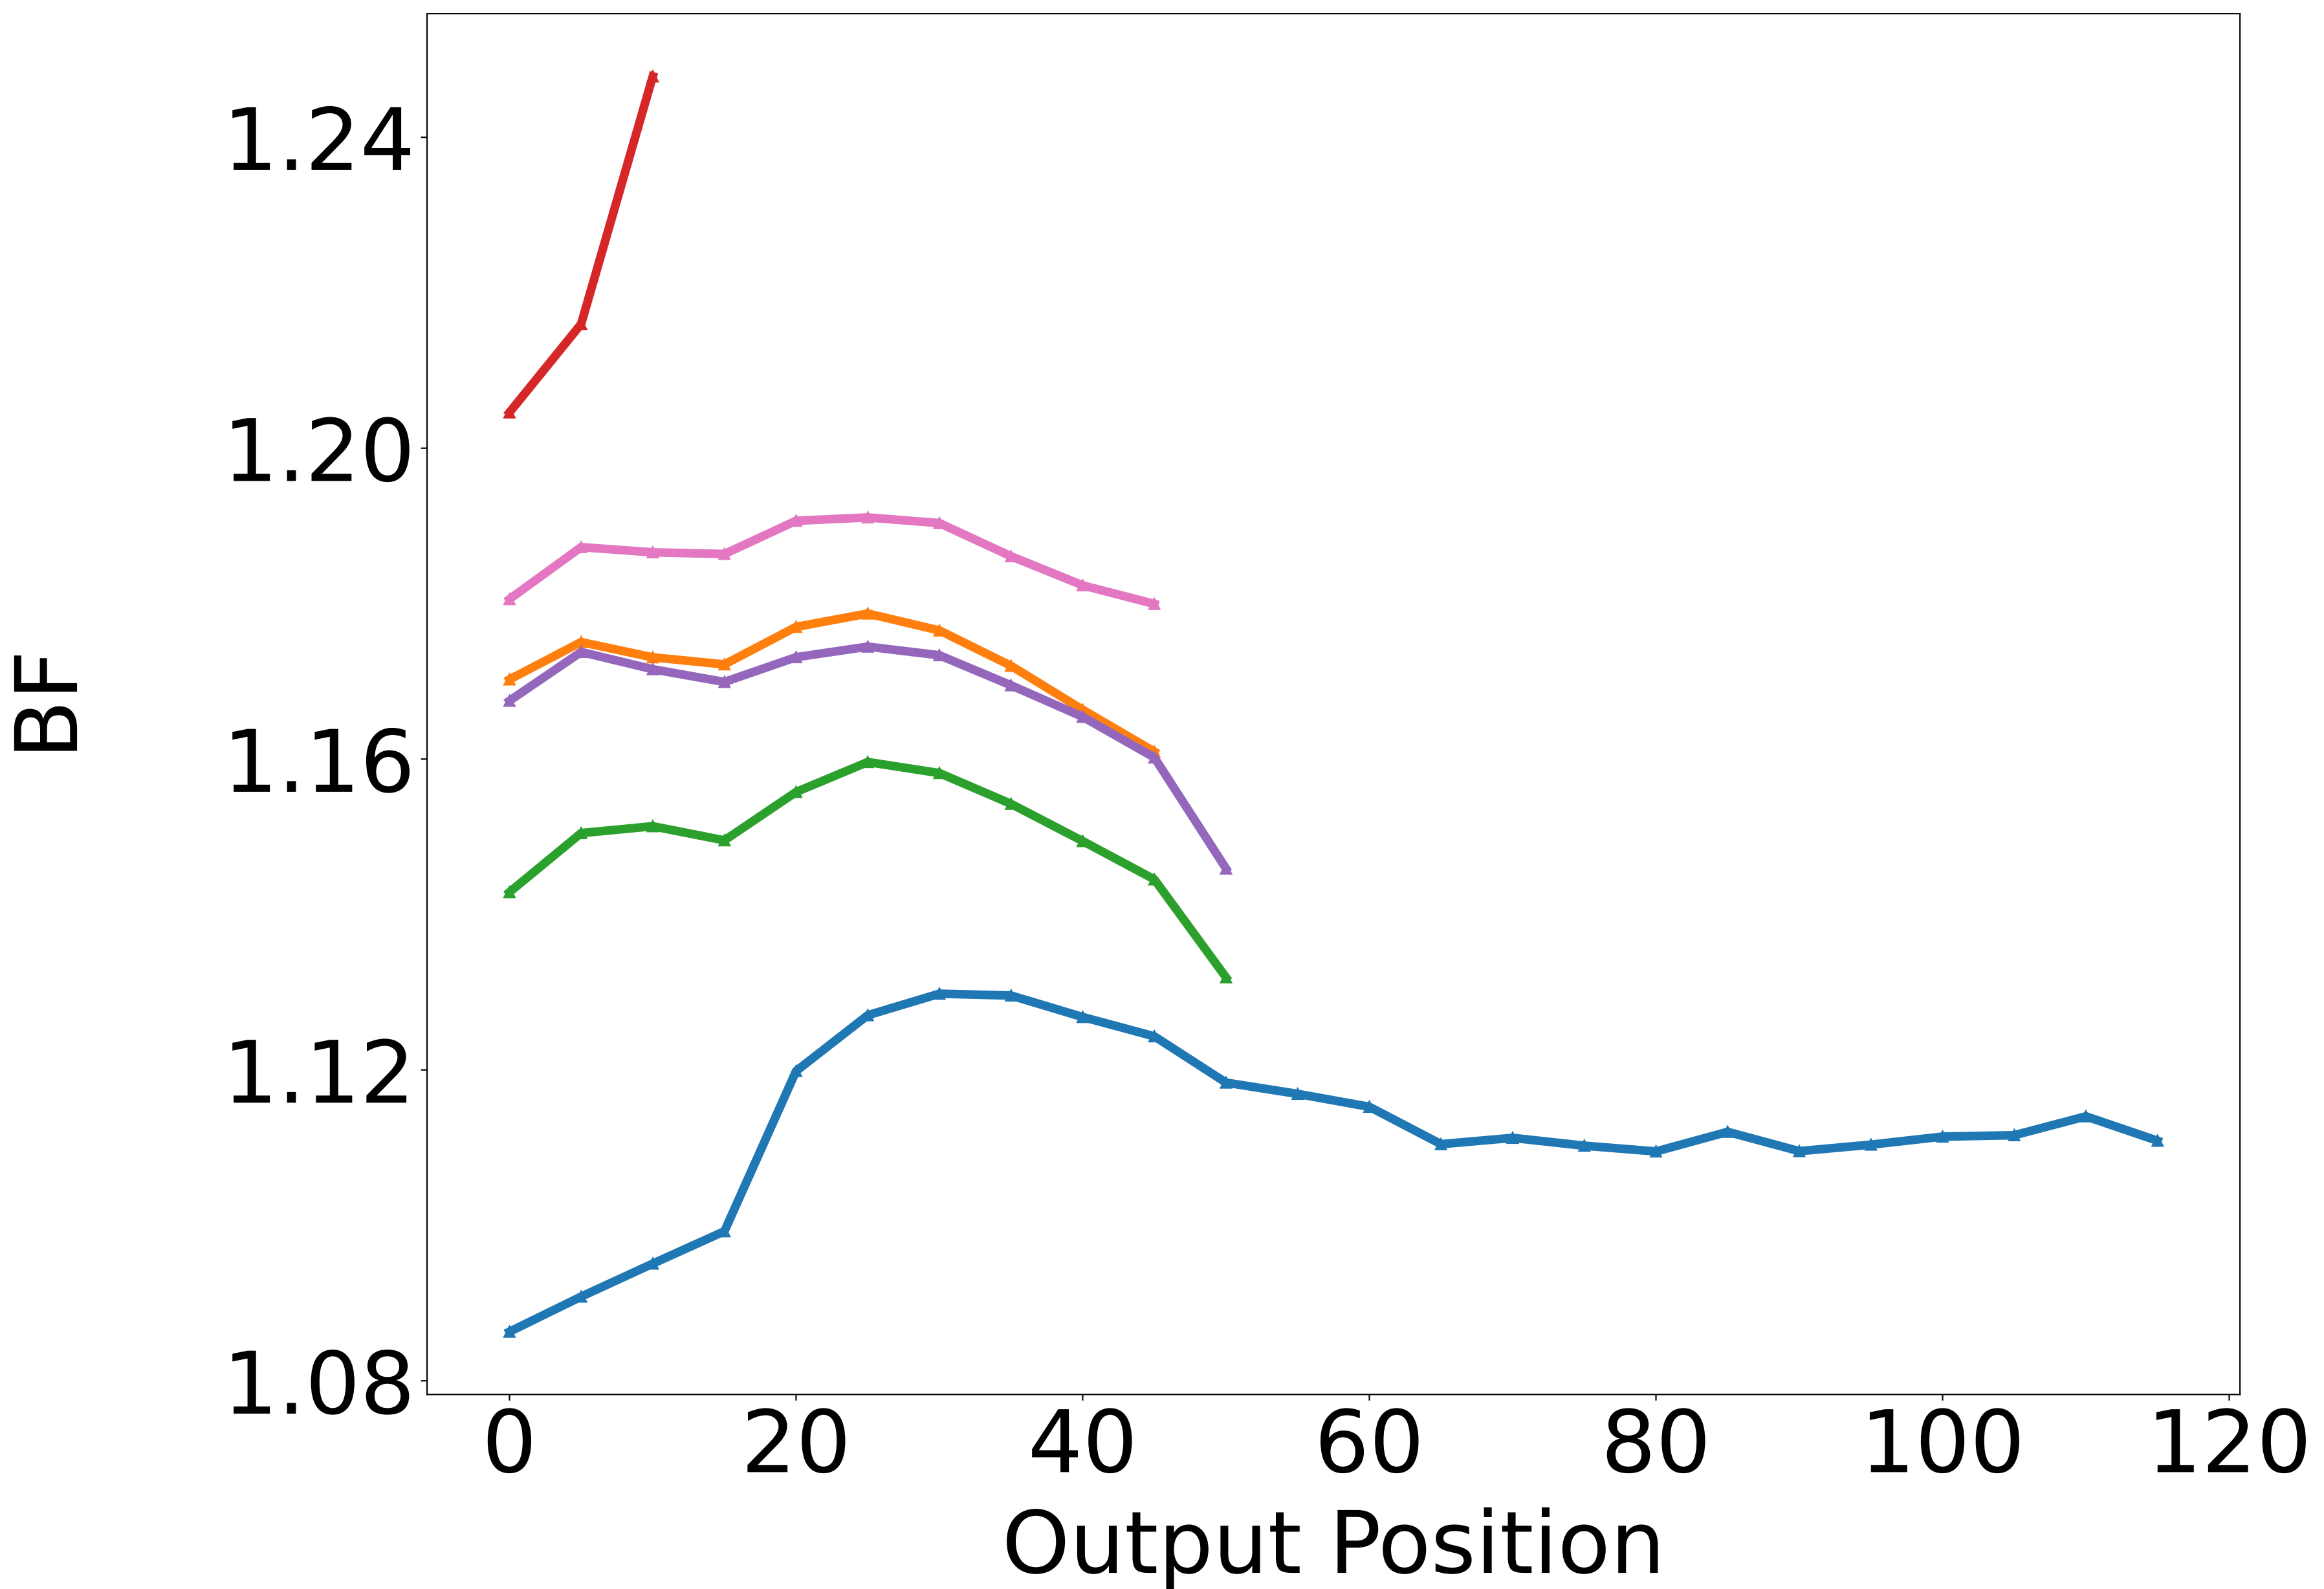

## Prompt Complexity (C)

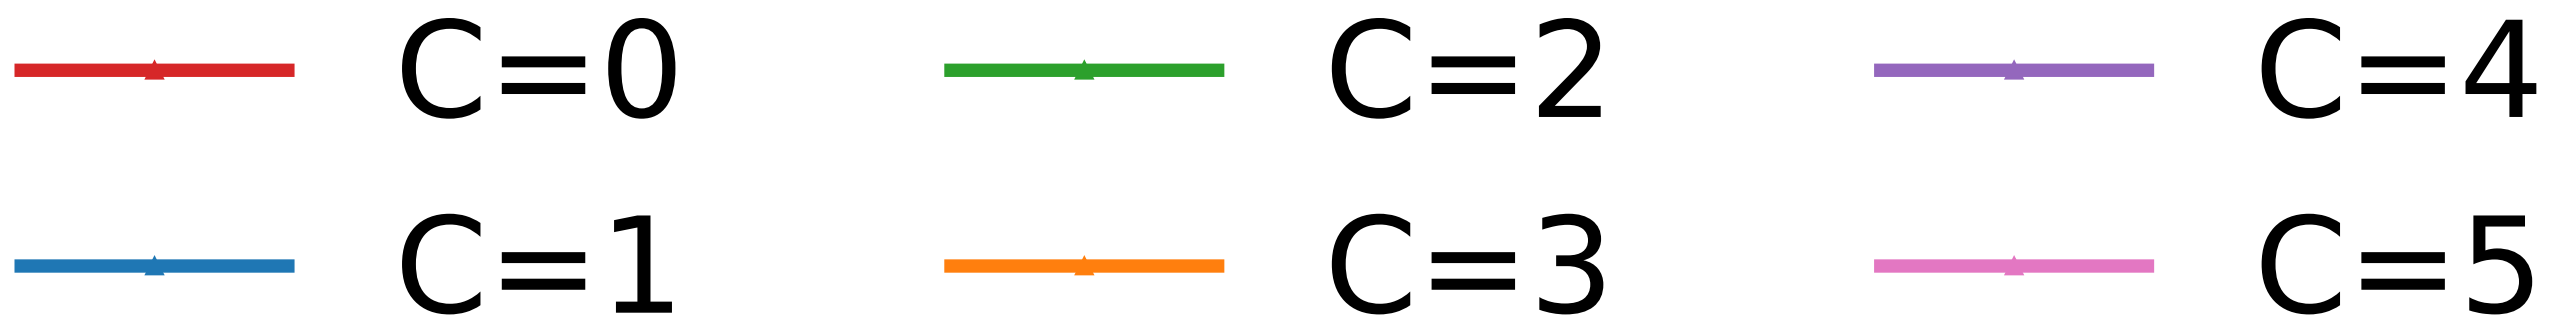

Supplement: supplementary_material [file piecewise_ebf_Llama-2-70B-chat_bf.pdf › supplementary_materials/bf_output_dynamic/random_strings/piecewise_ebf_Llama-2-70B-chat_bf.pdf]

# Llama-2-70B-chat

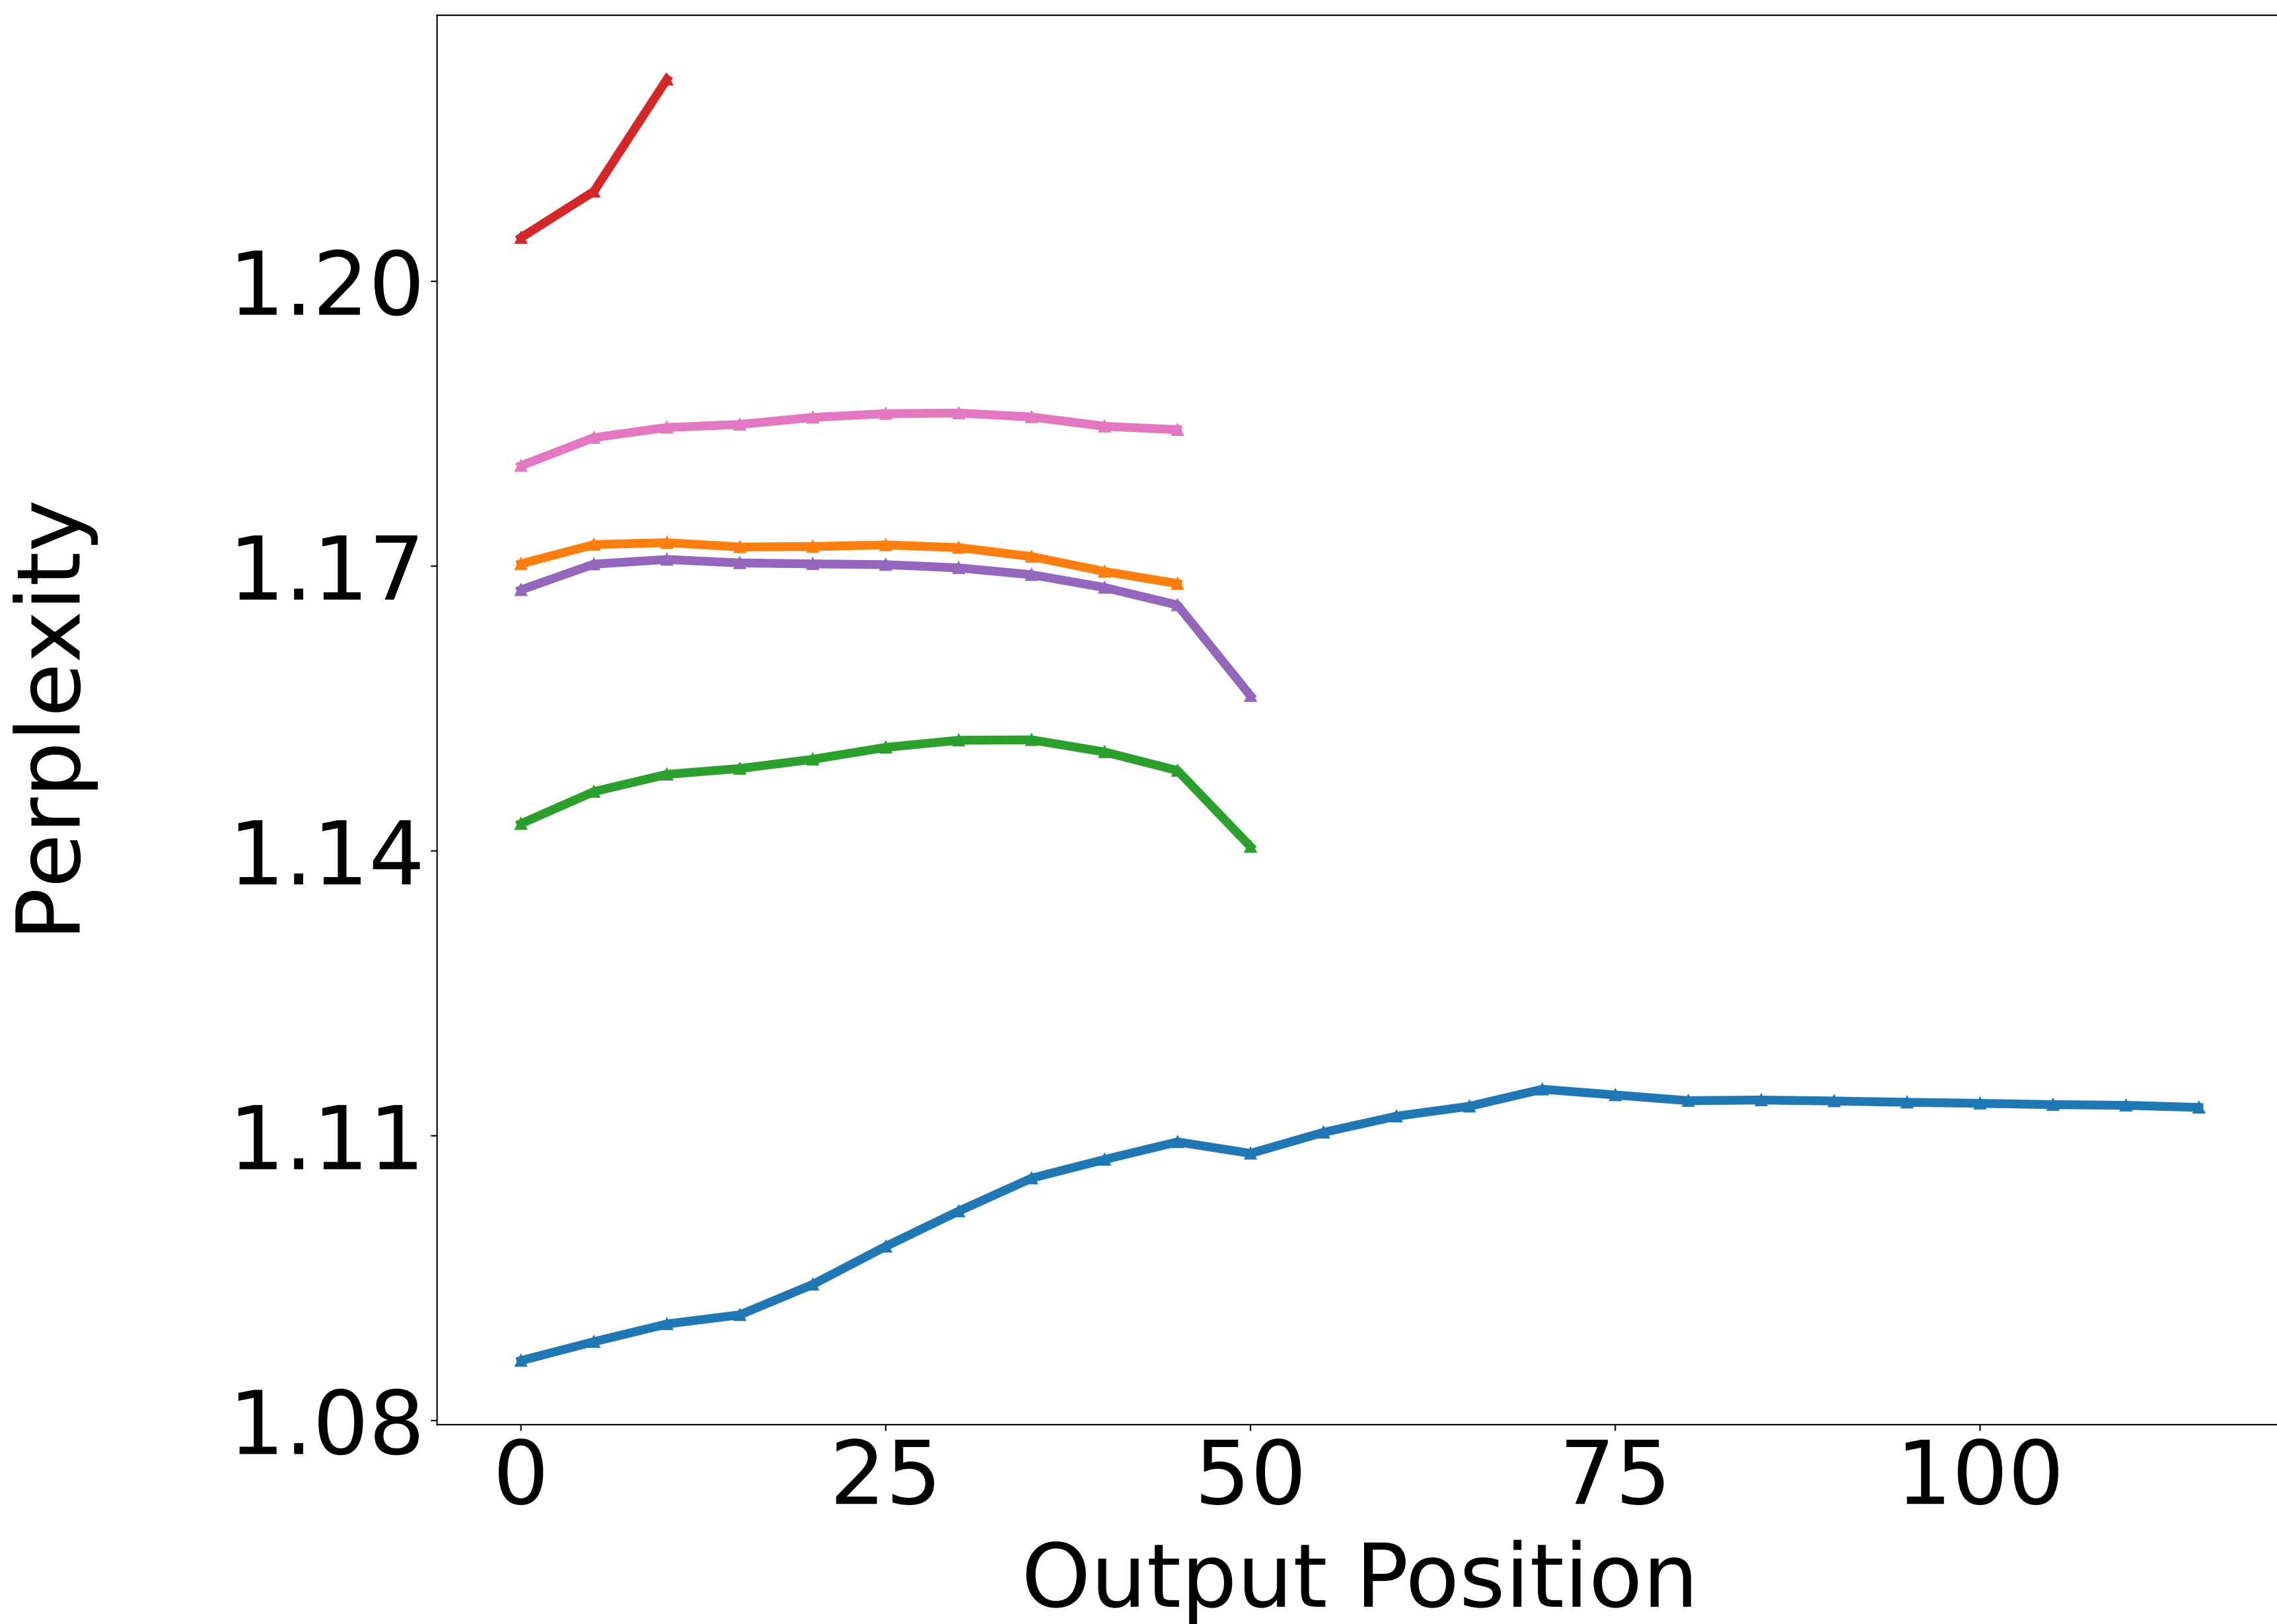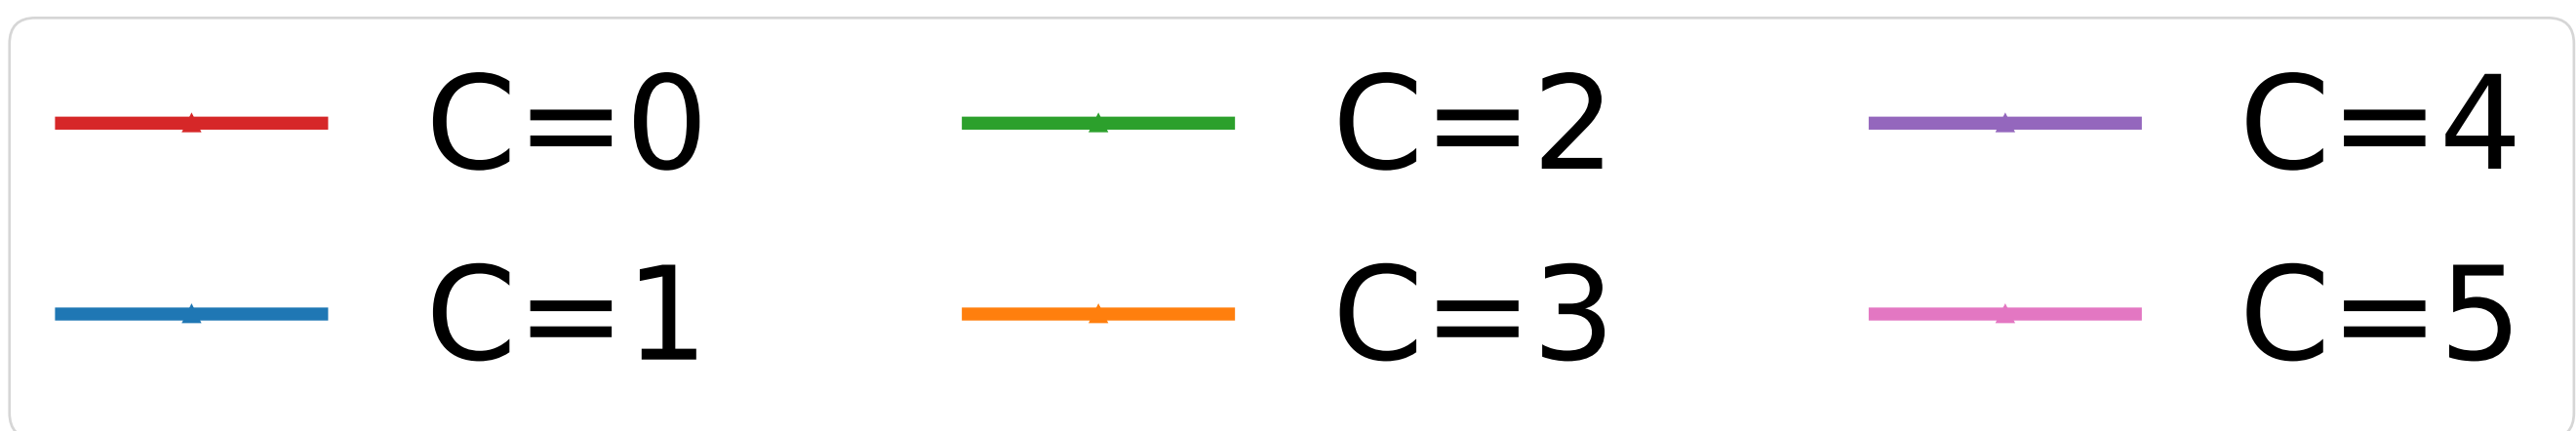

Supplement: supplementary_material [file piecewise_ebf_Llama-2-70B-chat_bf_fixed_start.pdf › supplementary_materials/bf_output_dynamic/random_strings/piecewise_ebf_Llama-2-70B-chat_bf_fixed_start.pdf]

# Llama-2-70B

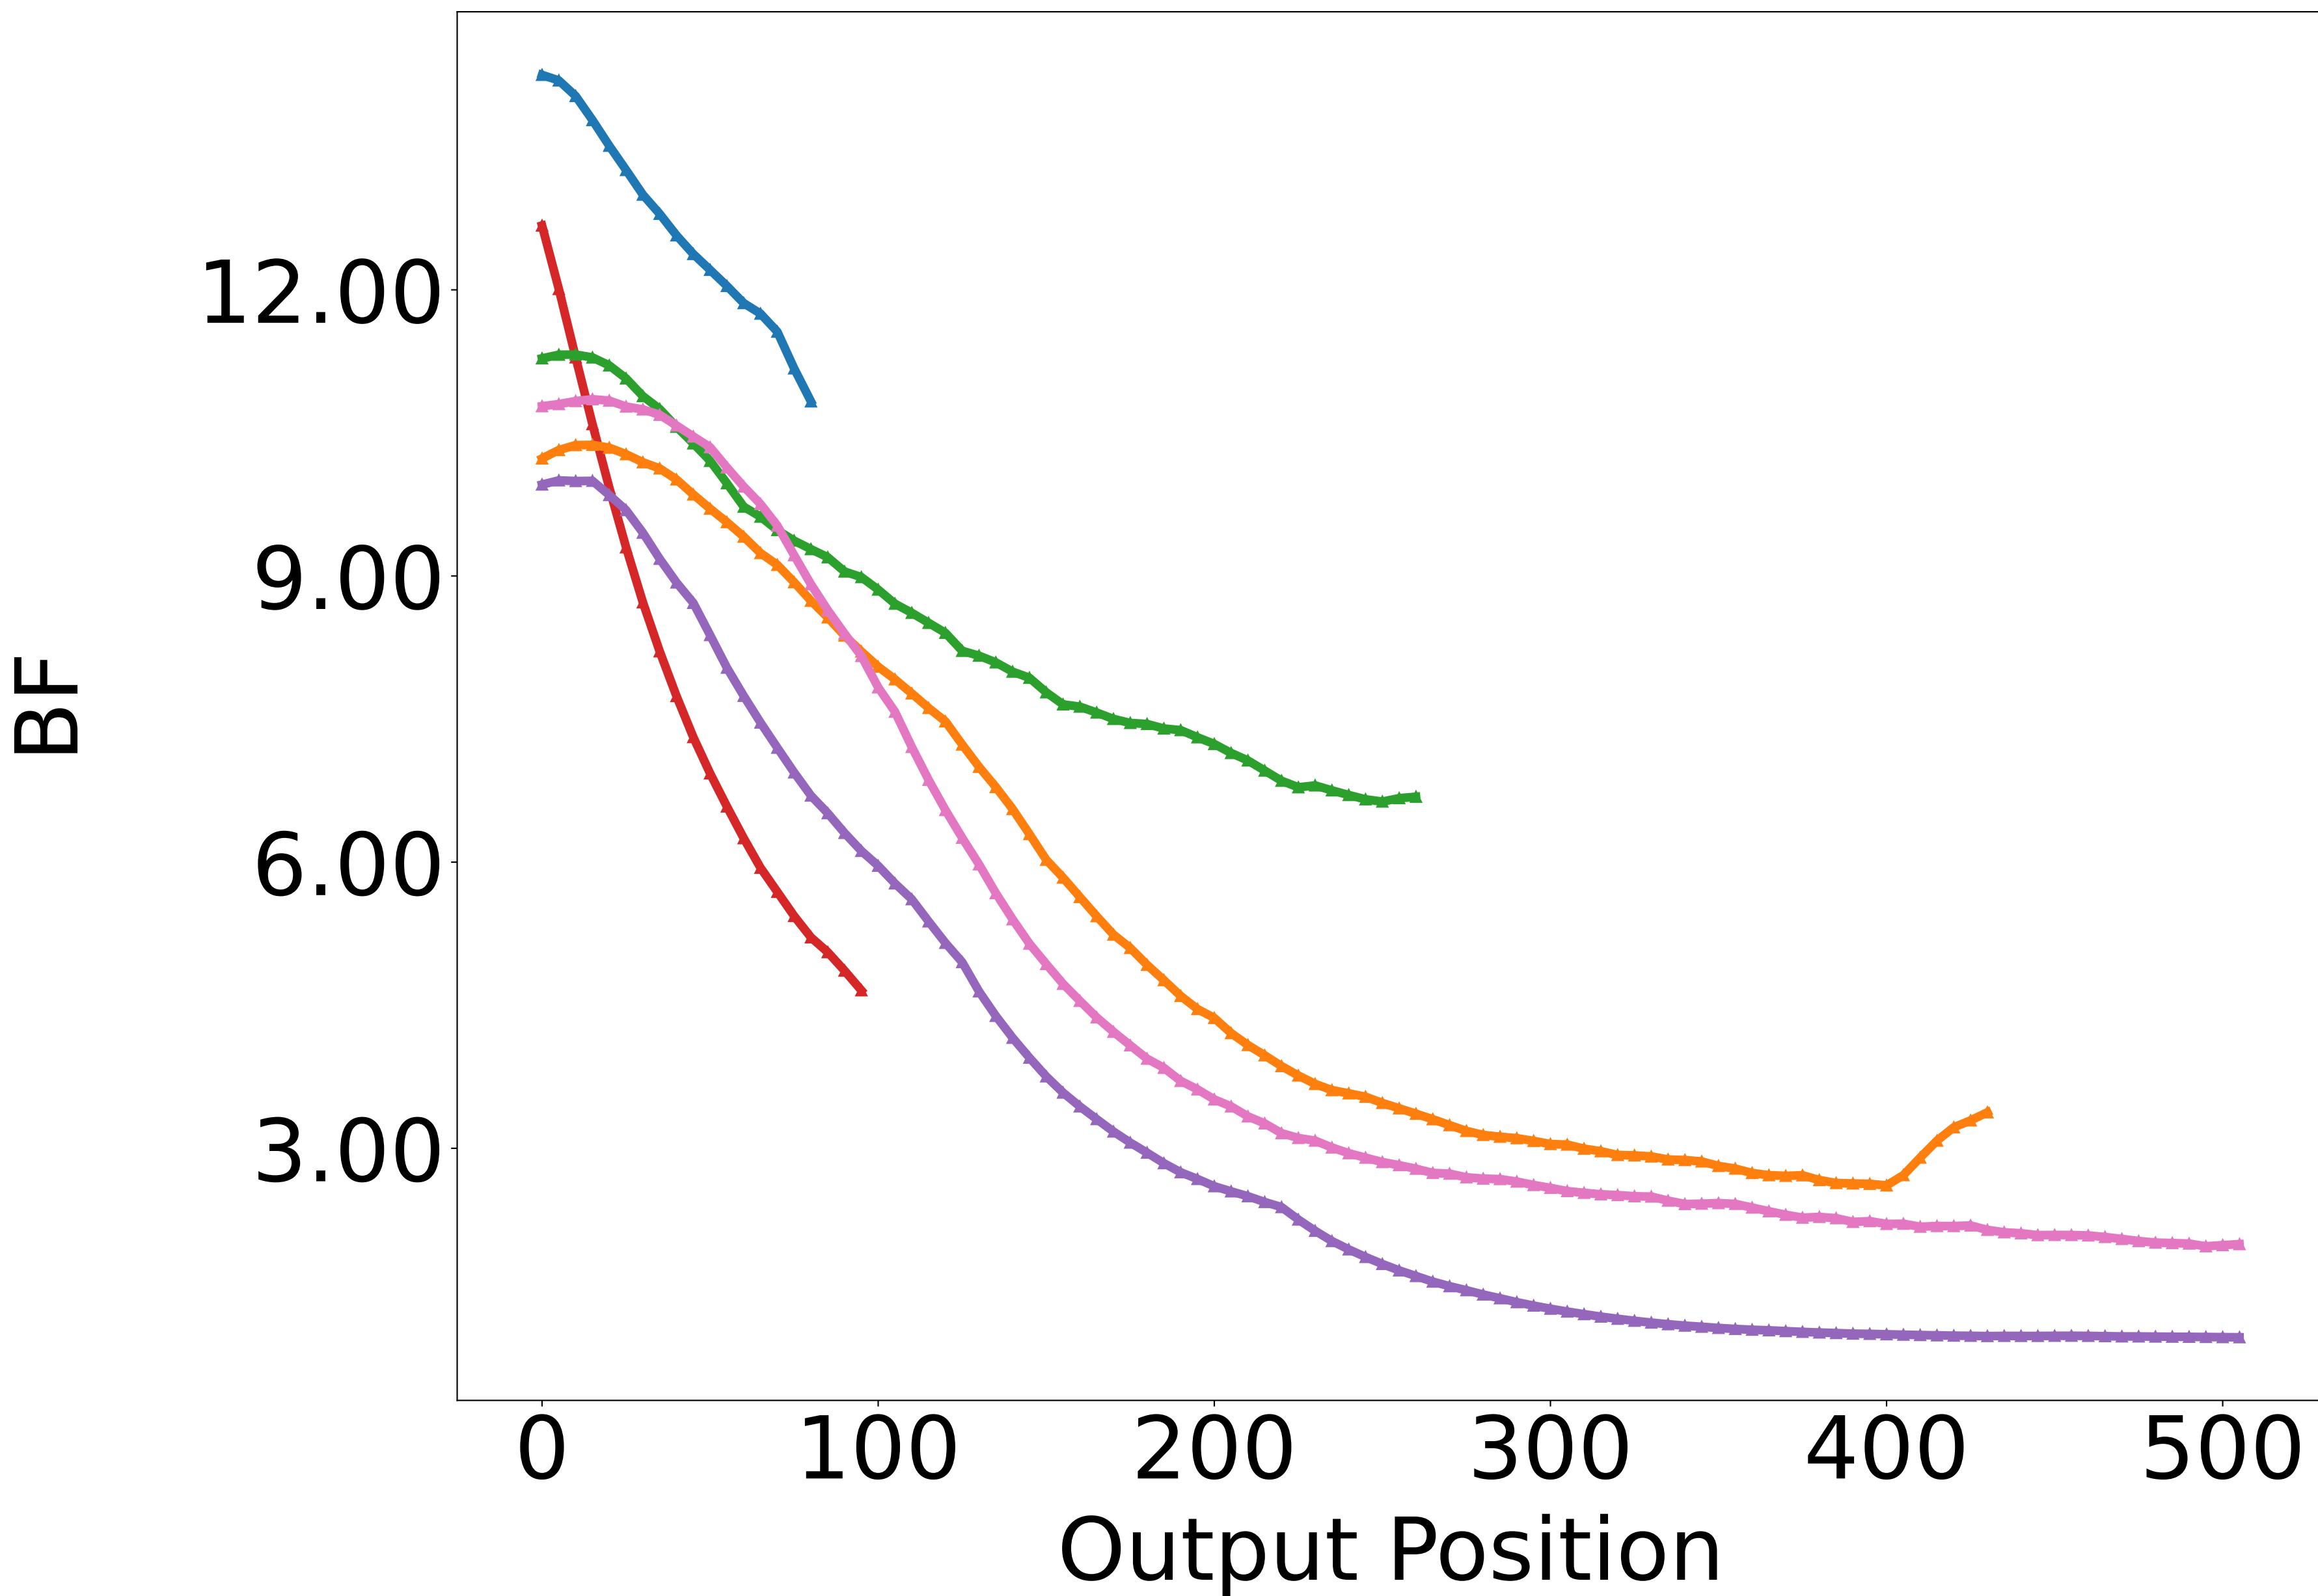

## Prompt Complexity (C)



Supplement: supplementary_material [file piecewise_ebf_Llama-2-70B_bf.pdf › supplementary_materials/bf_output_dynamic/random_strings/piecewise_ebf_Llama-2-70B_bf.pdf]

# Llama-3-70B-Instruct

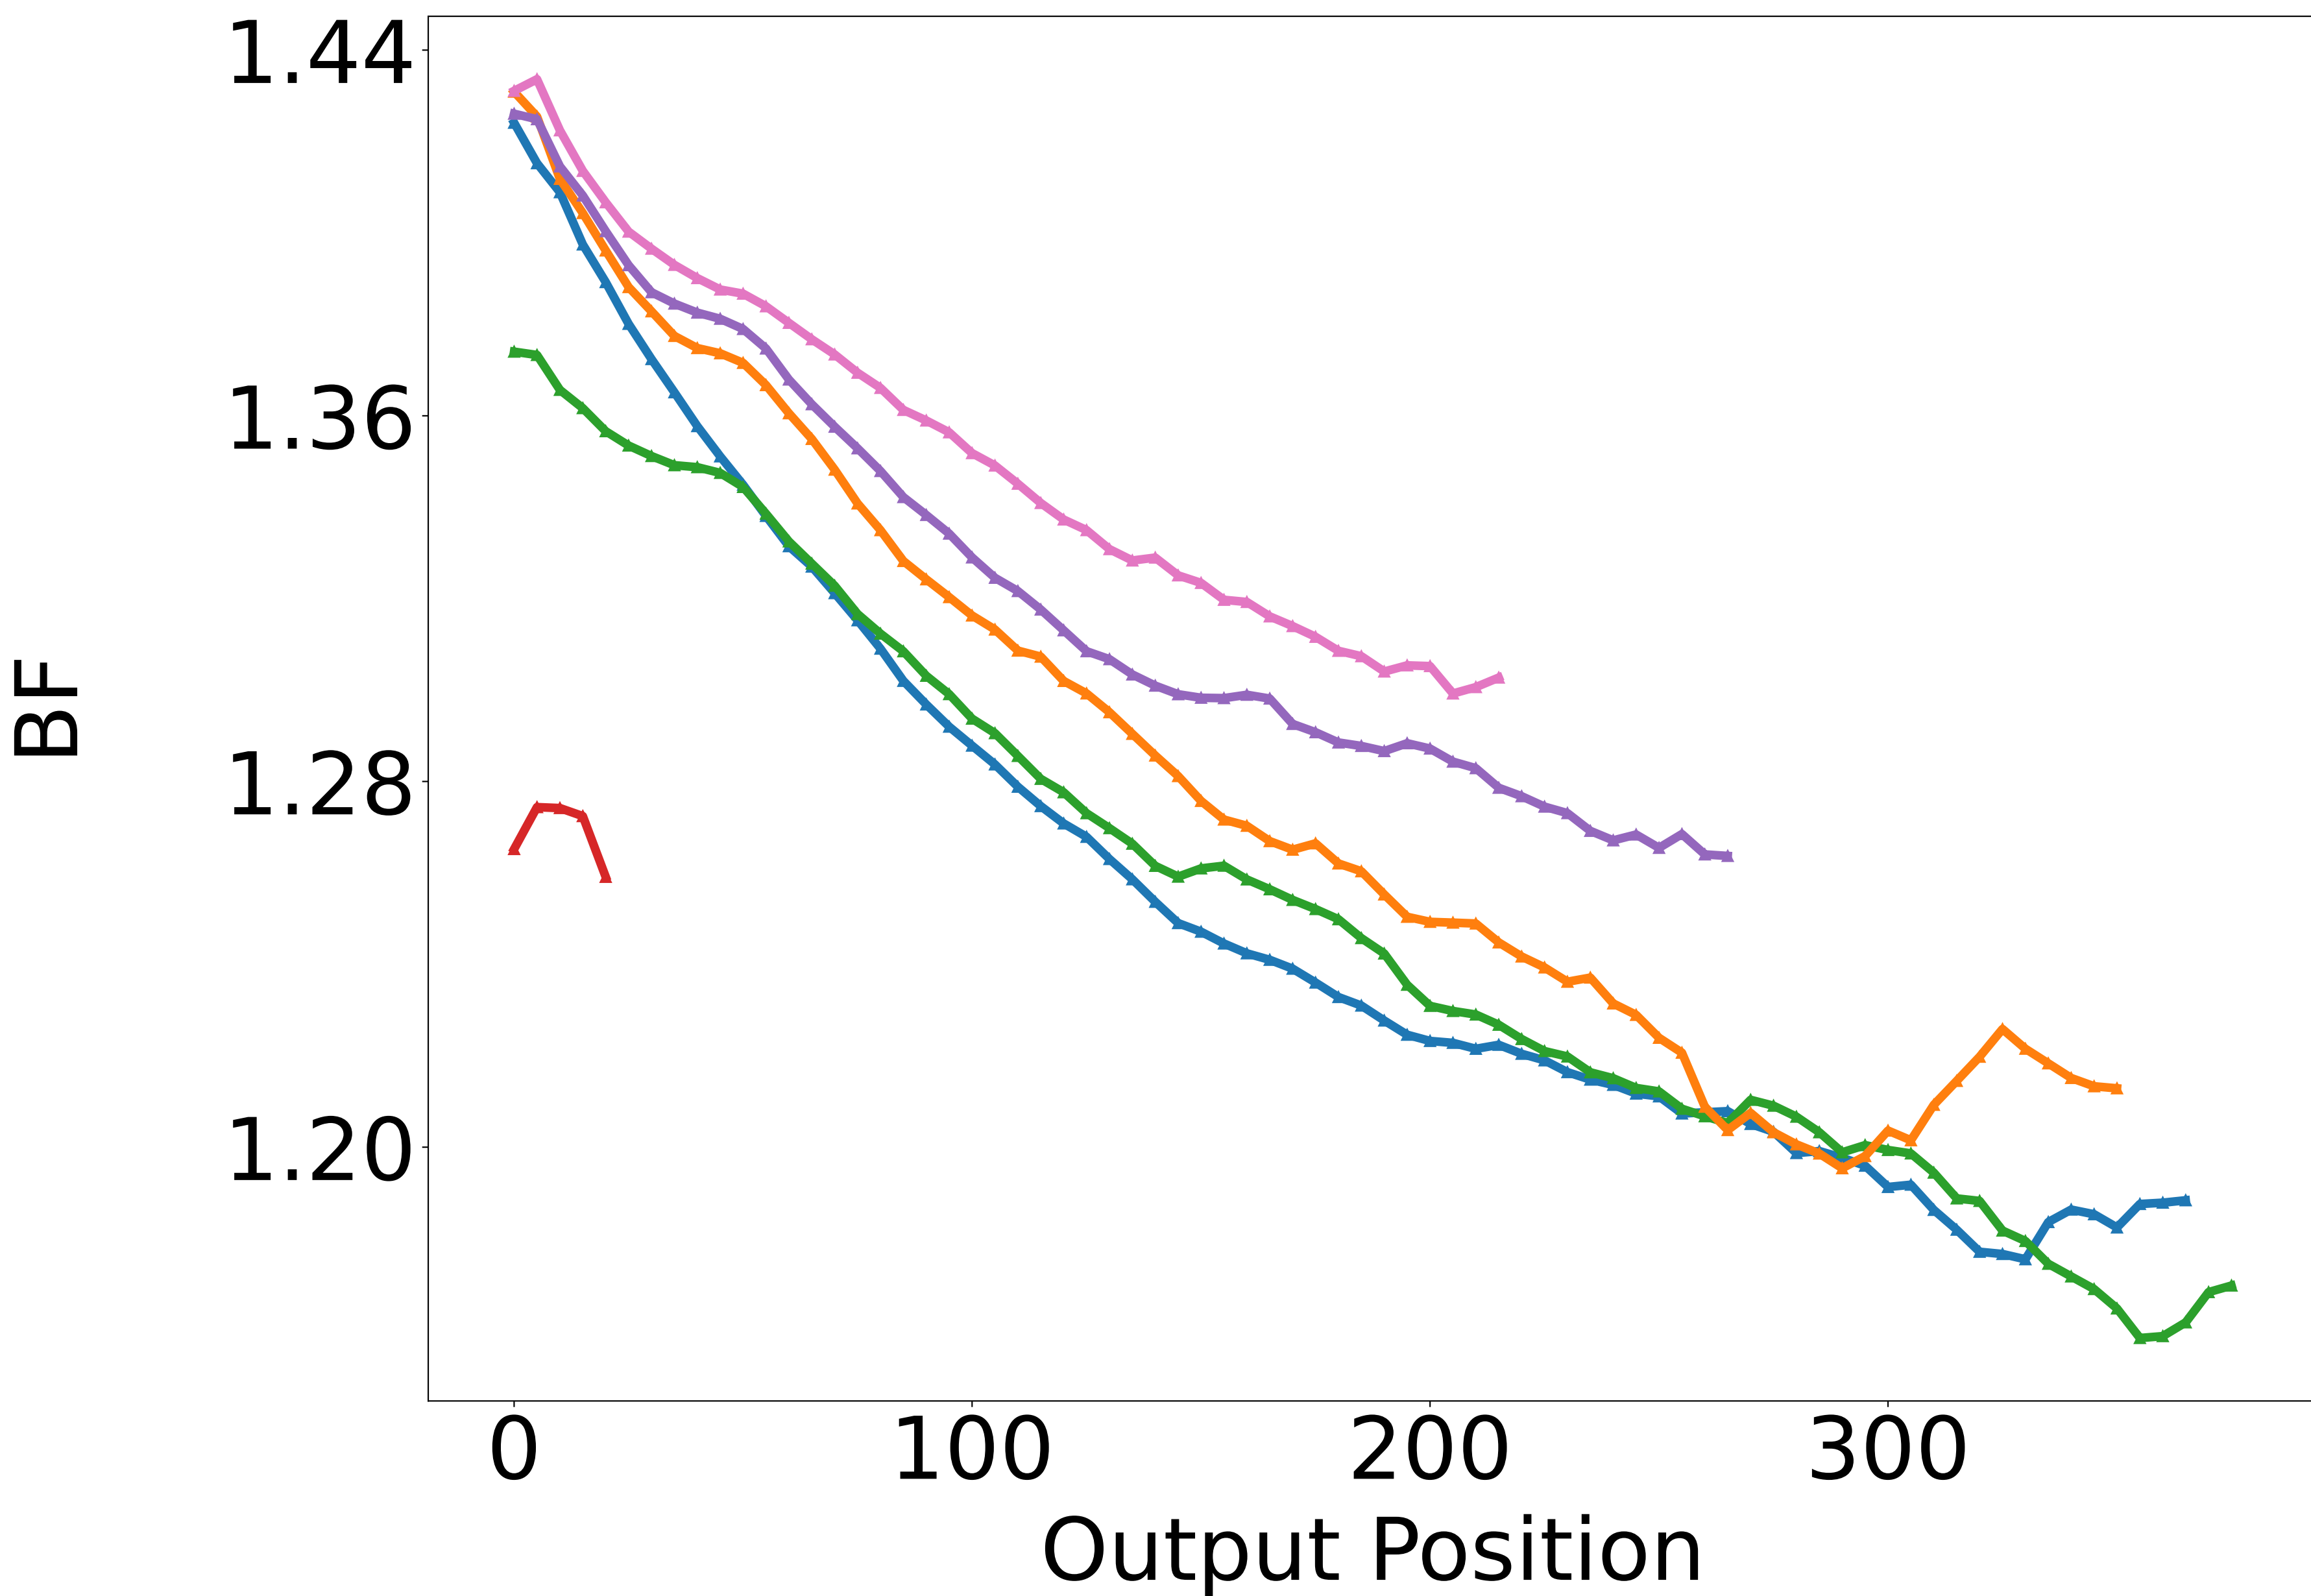

## Prompt Complexity (C)



Supplement: supplementary_material [file piecewise_ebf_Llama-3-70B-Instruct_bf.pdf › supplementary_materials/bf_output_dynamic/random_strings/piecewise_ebf_Llama-3-70B-Instruct_bf.pdf]

# Llama-3-70B

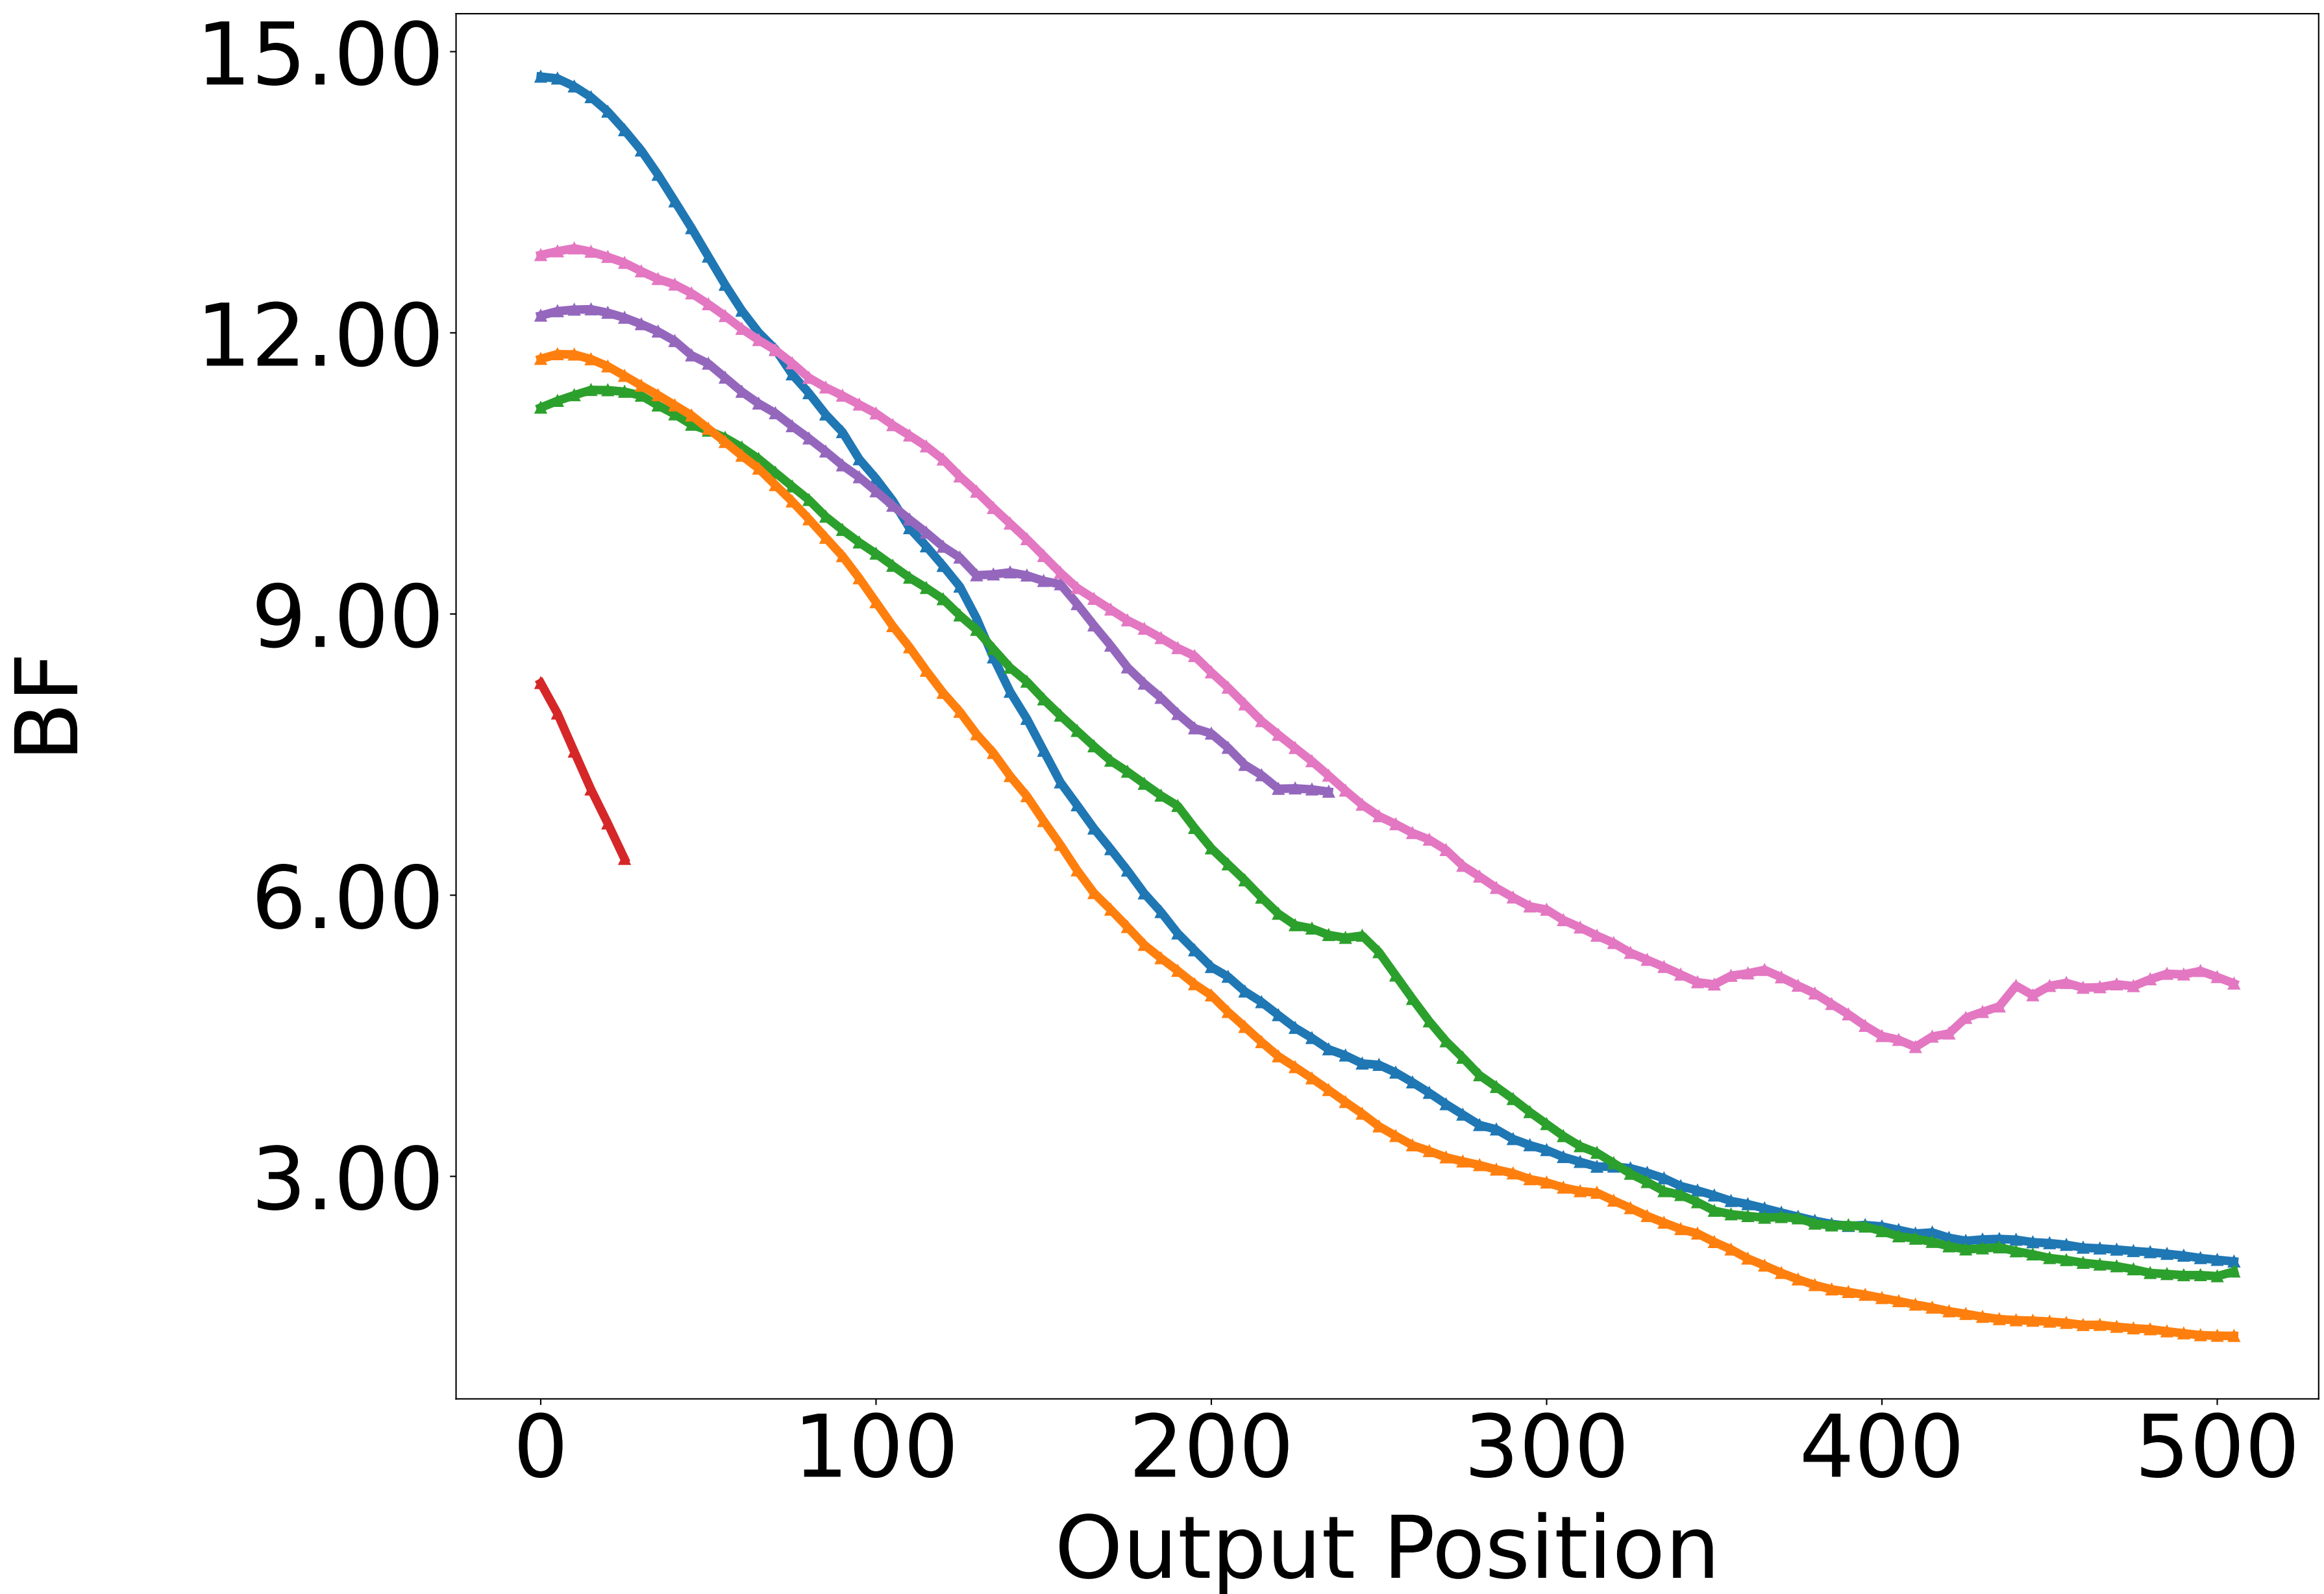

Supplement: supplementary_material [file piecewise_ebf_Llama-3-70B_bf.pdf › supplementary_materials/bf_output_dynamic/random_strings/piecewise_ebf_Llama-3-70B_bf.pdf]

# Llama-3-8B-Instruct

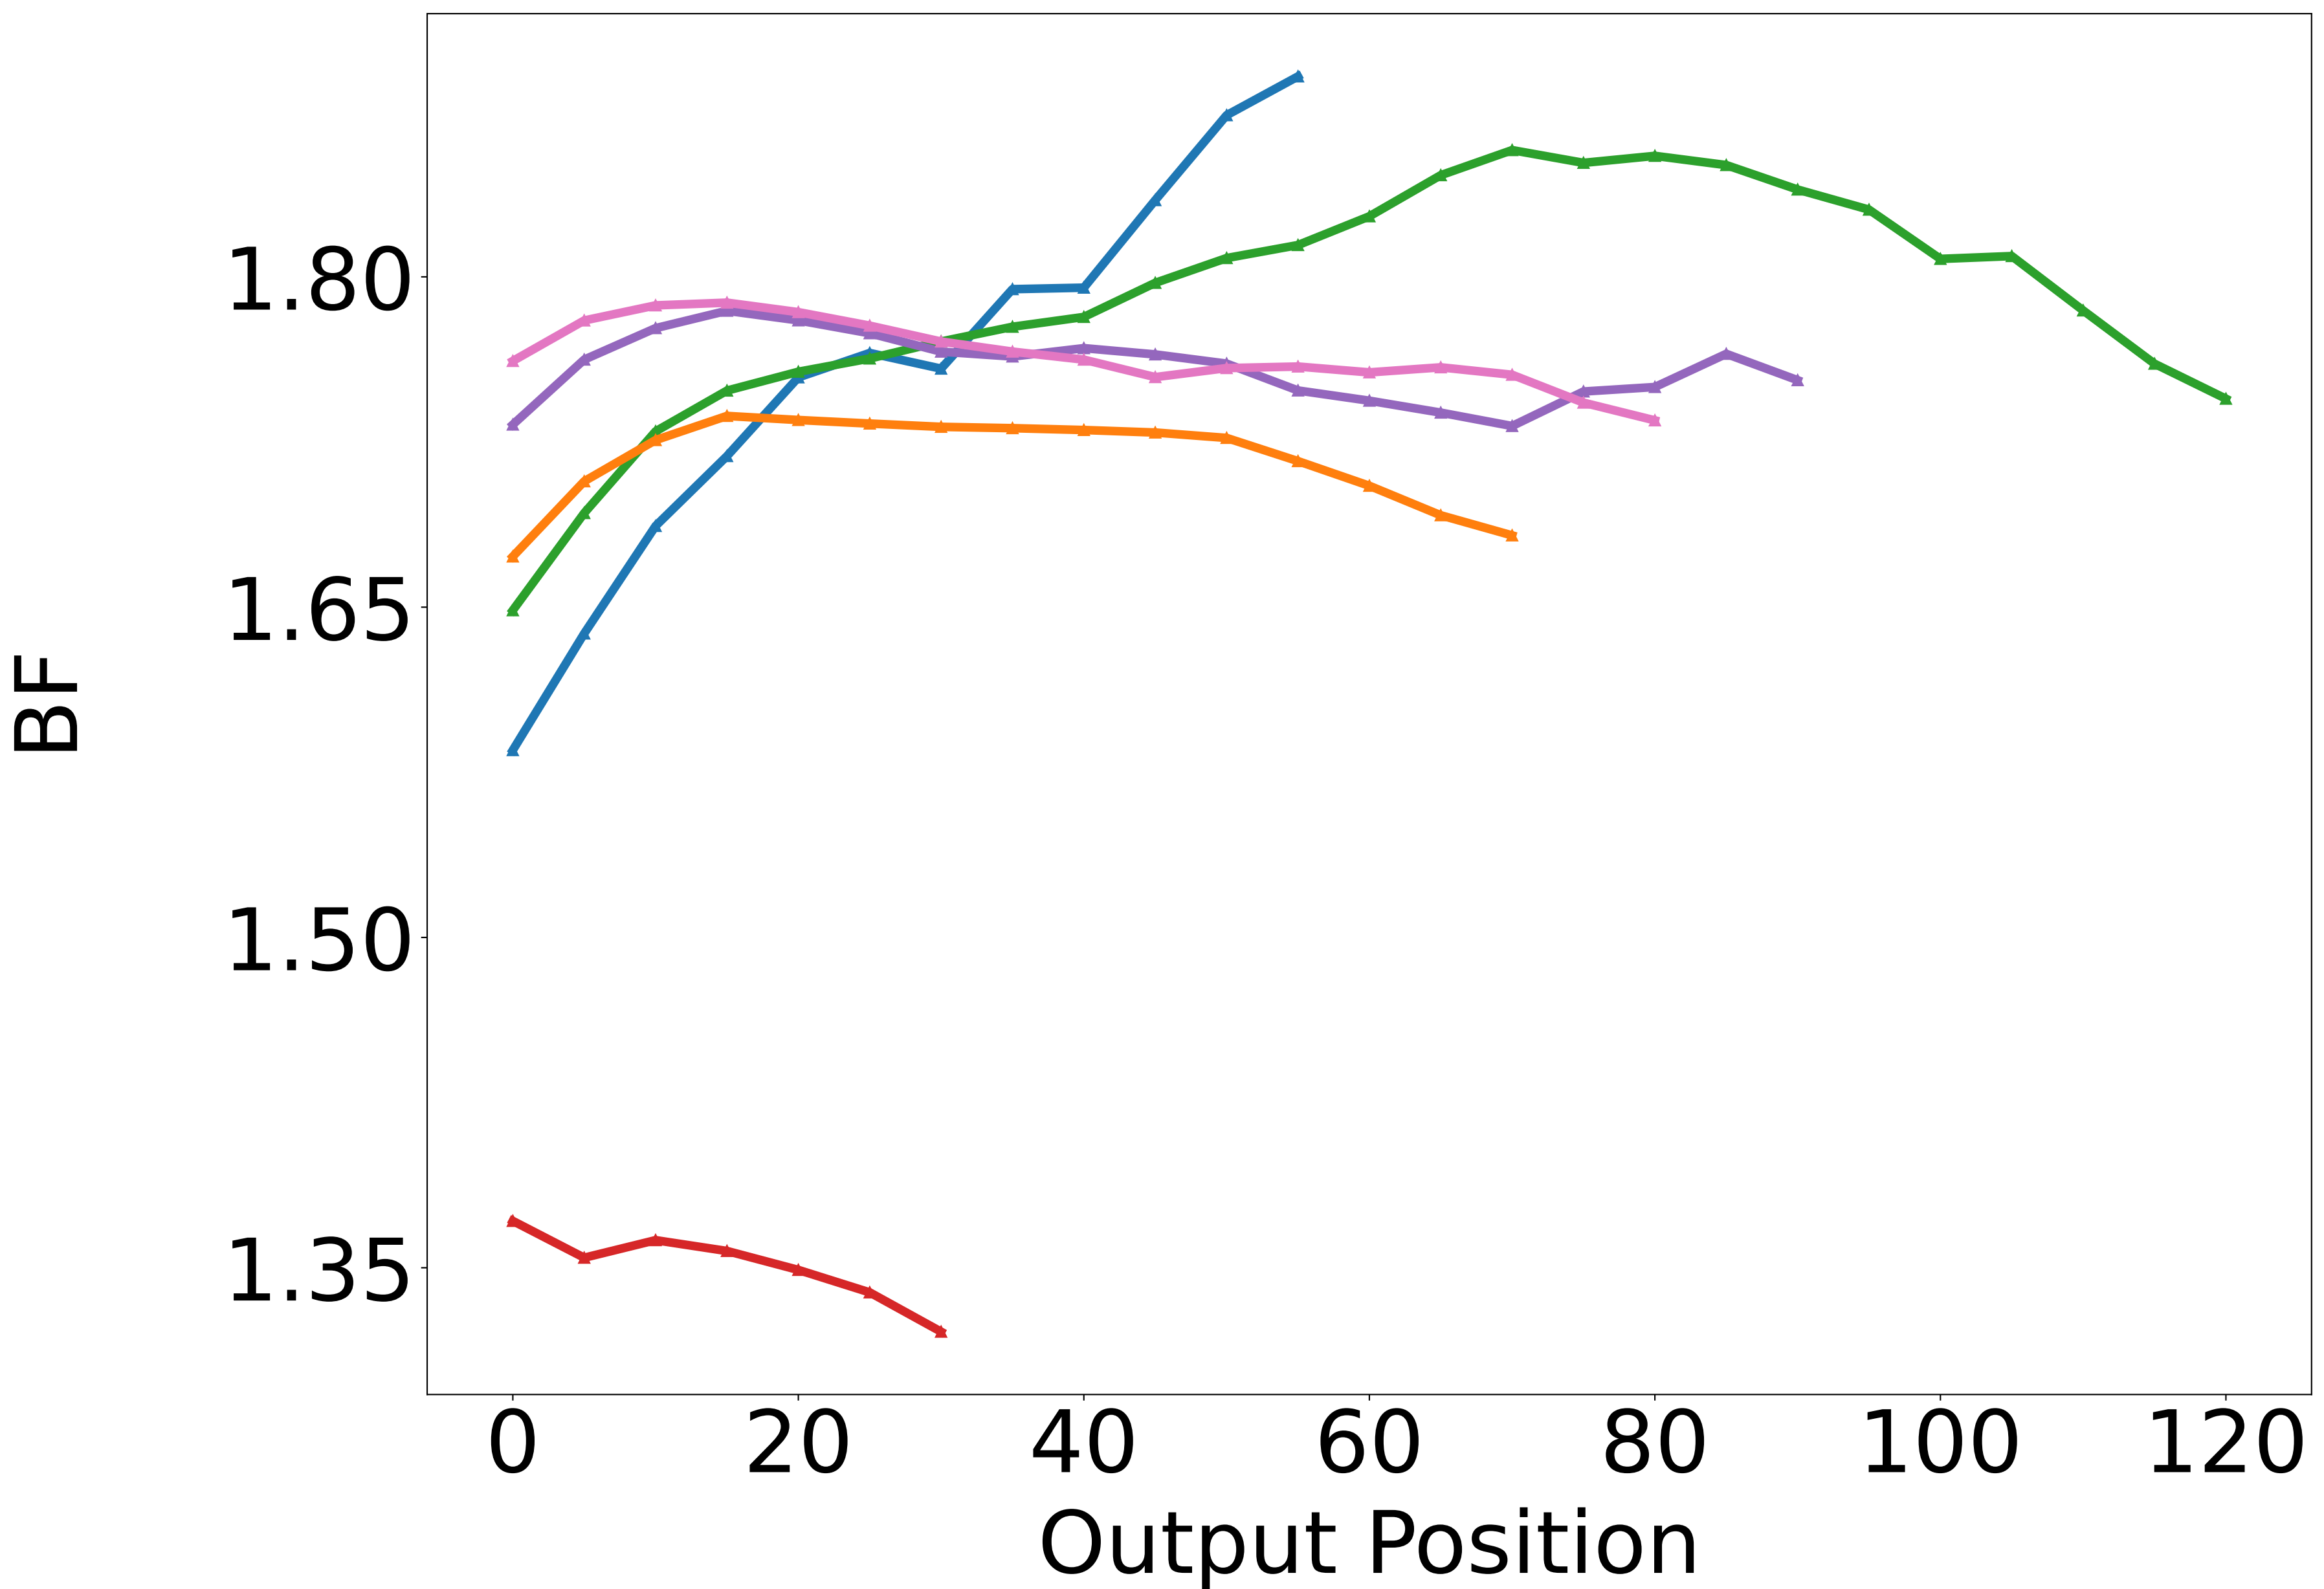

## Prompt Complexity (C)

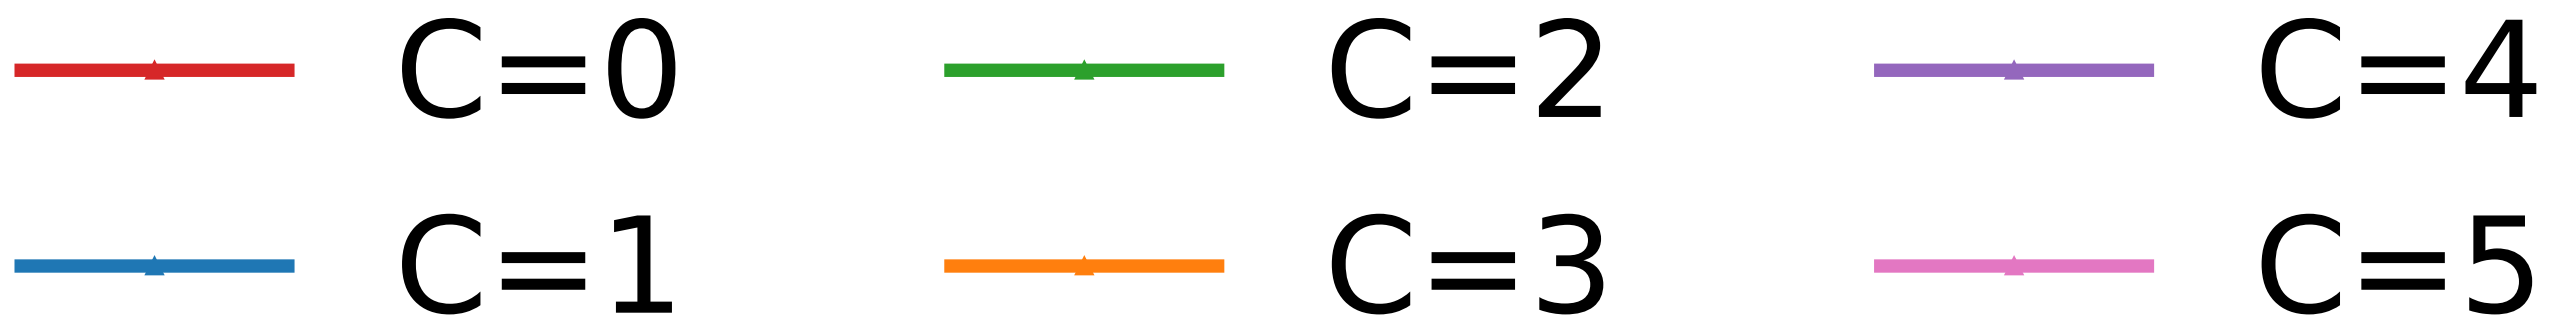

Supplement: supplementary_material [file piecewise_ebf_Llama-3-8B-Instruct_bf.pdf › supplementary_materials/bf_output_dynamic/random_strings/piecewise_ebf_Llama-3-8B-Instruct_bf.pdf]

# Llama-3-8B-Instruct

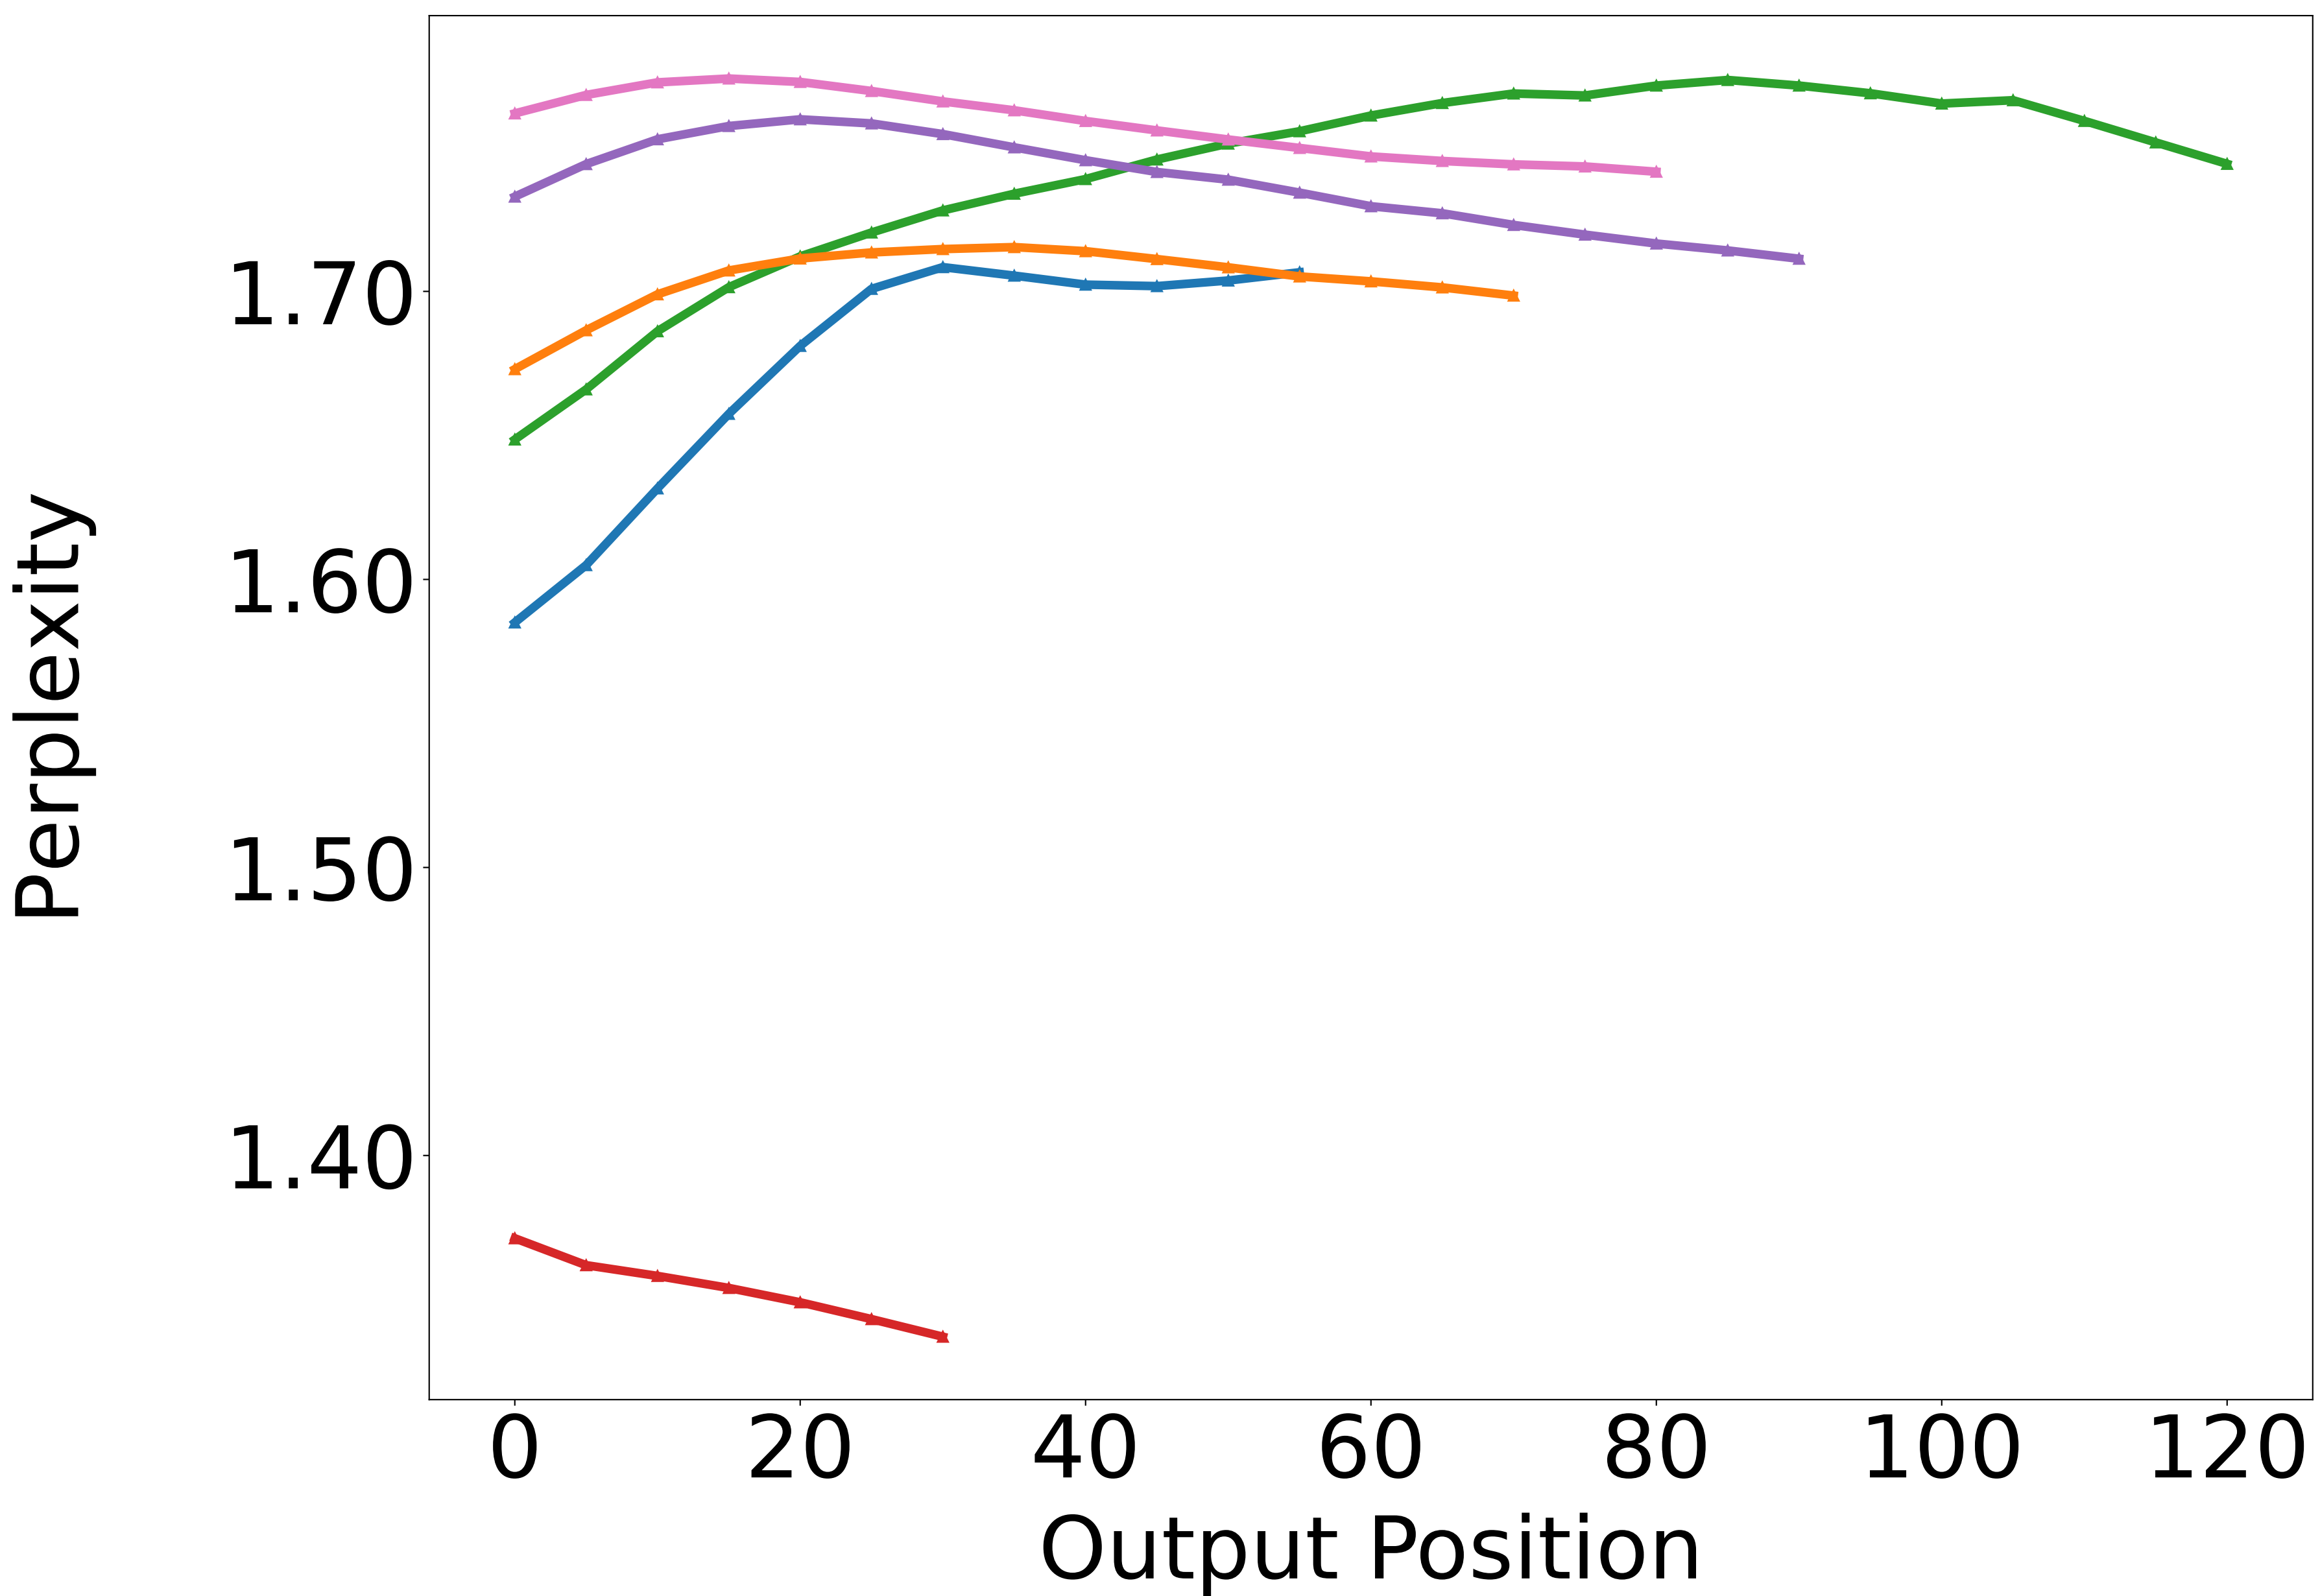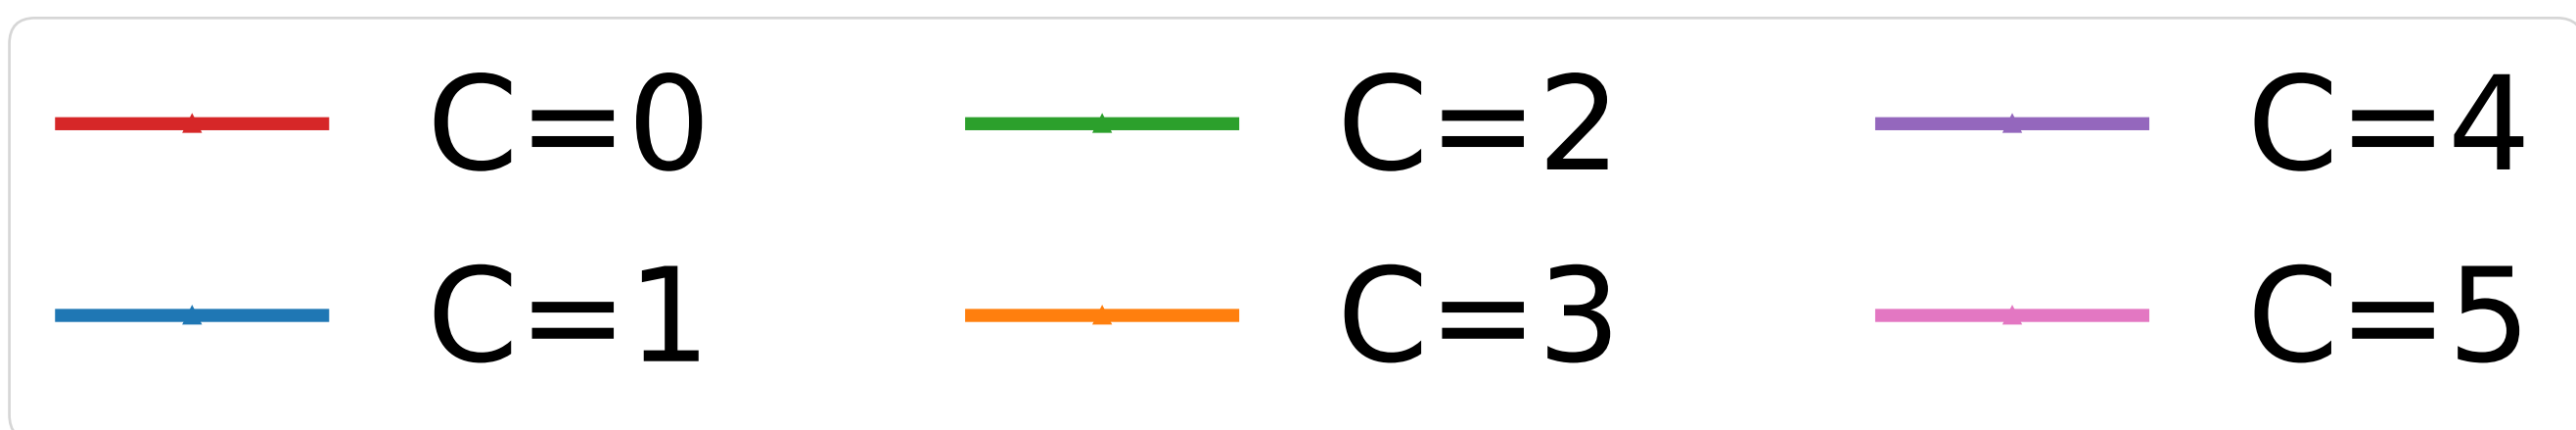

Supplement: supplementary_material [file piecewise_ebf_Llama-3-8B-Instruct_bf_fixed_start.pdf › supplementary_materials/bf_output_dynamic/random_strings/piecewise_ebf_Llama-3-8B-Instruct_bf_fixed_start.pdf]

# Llama-3-8B

BF

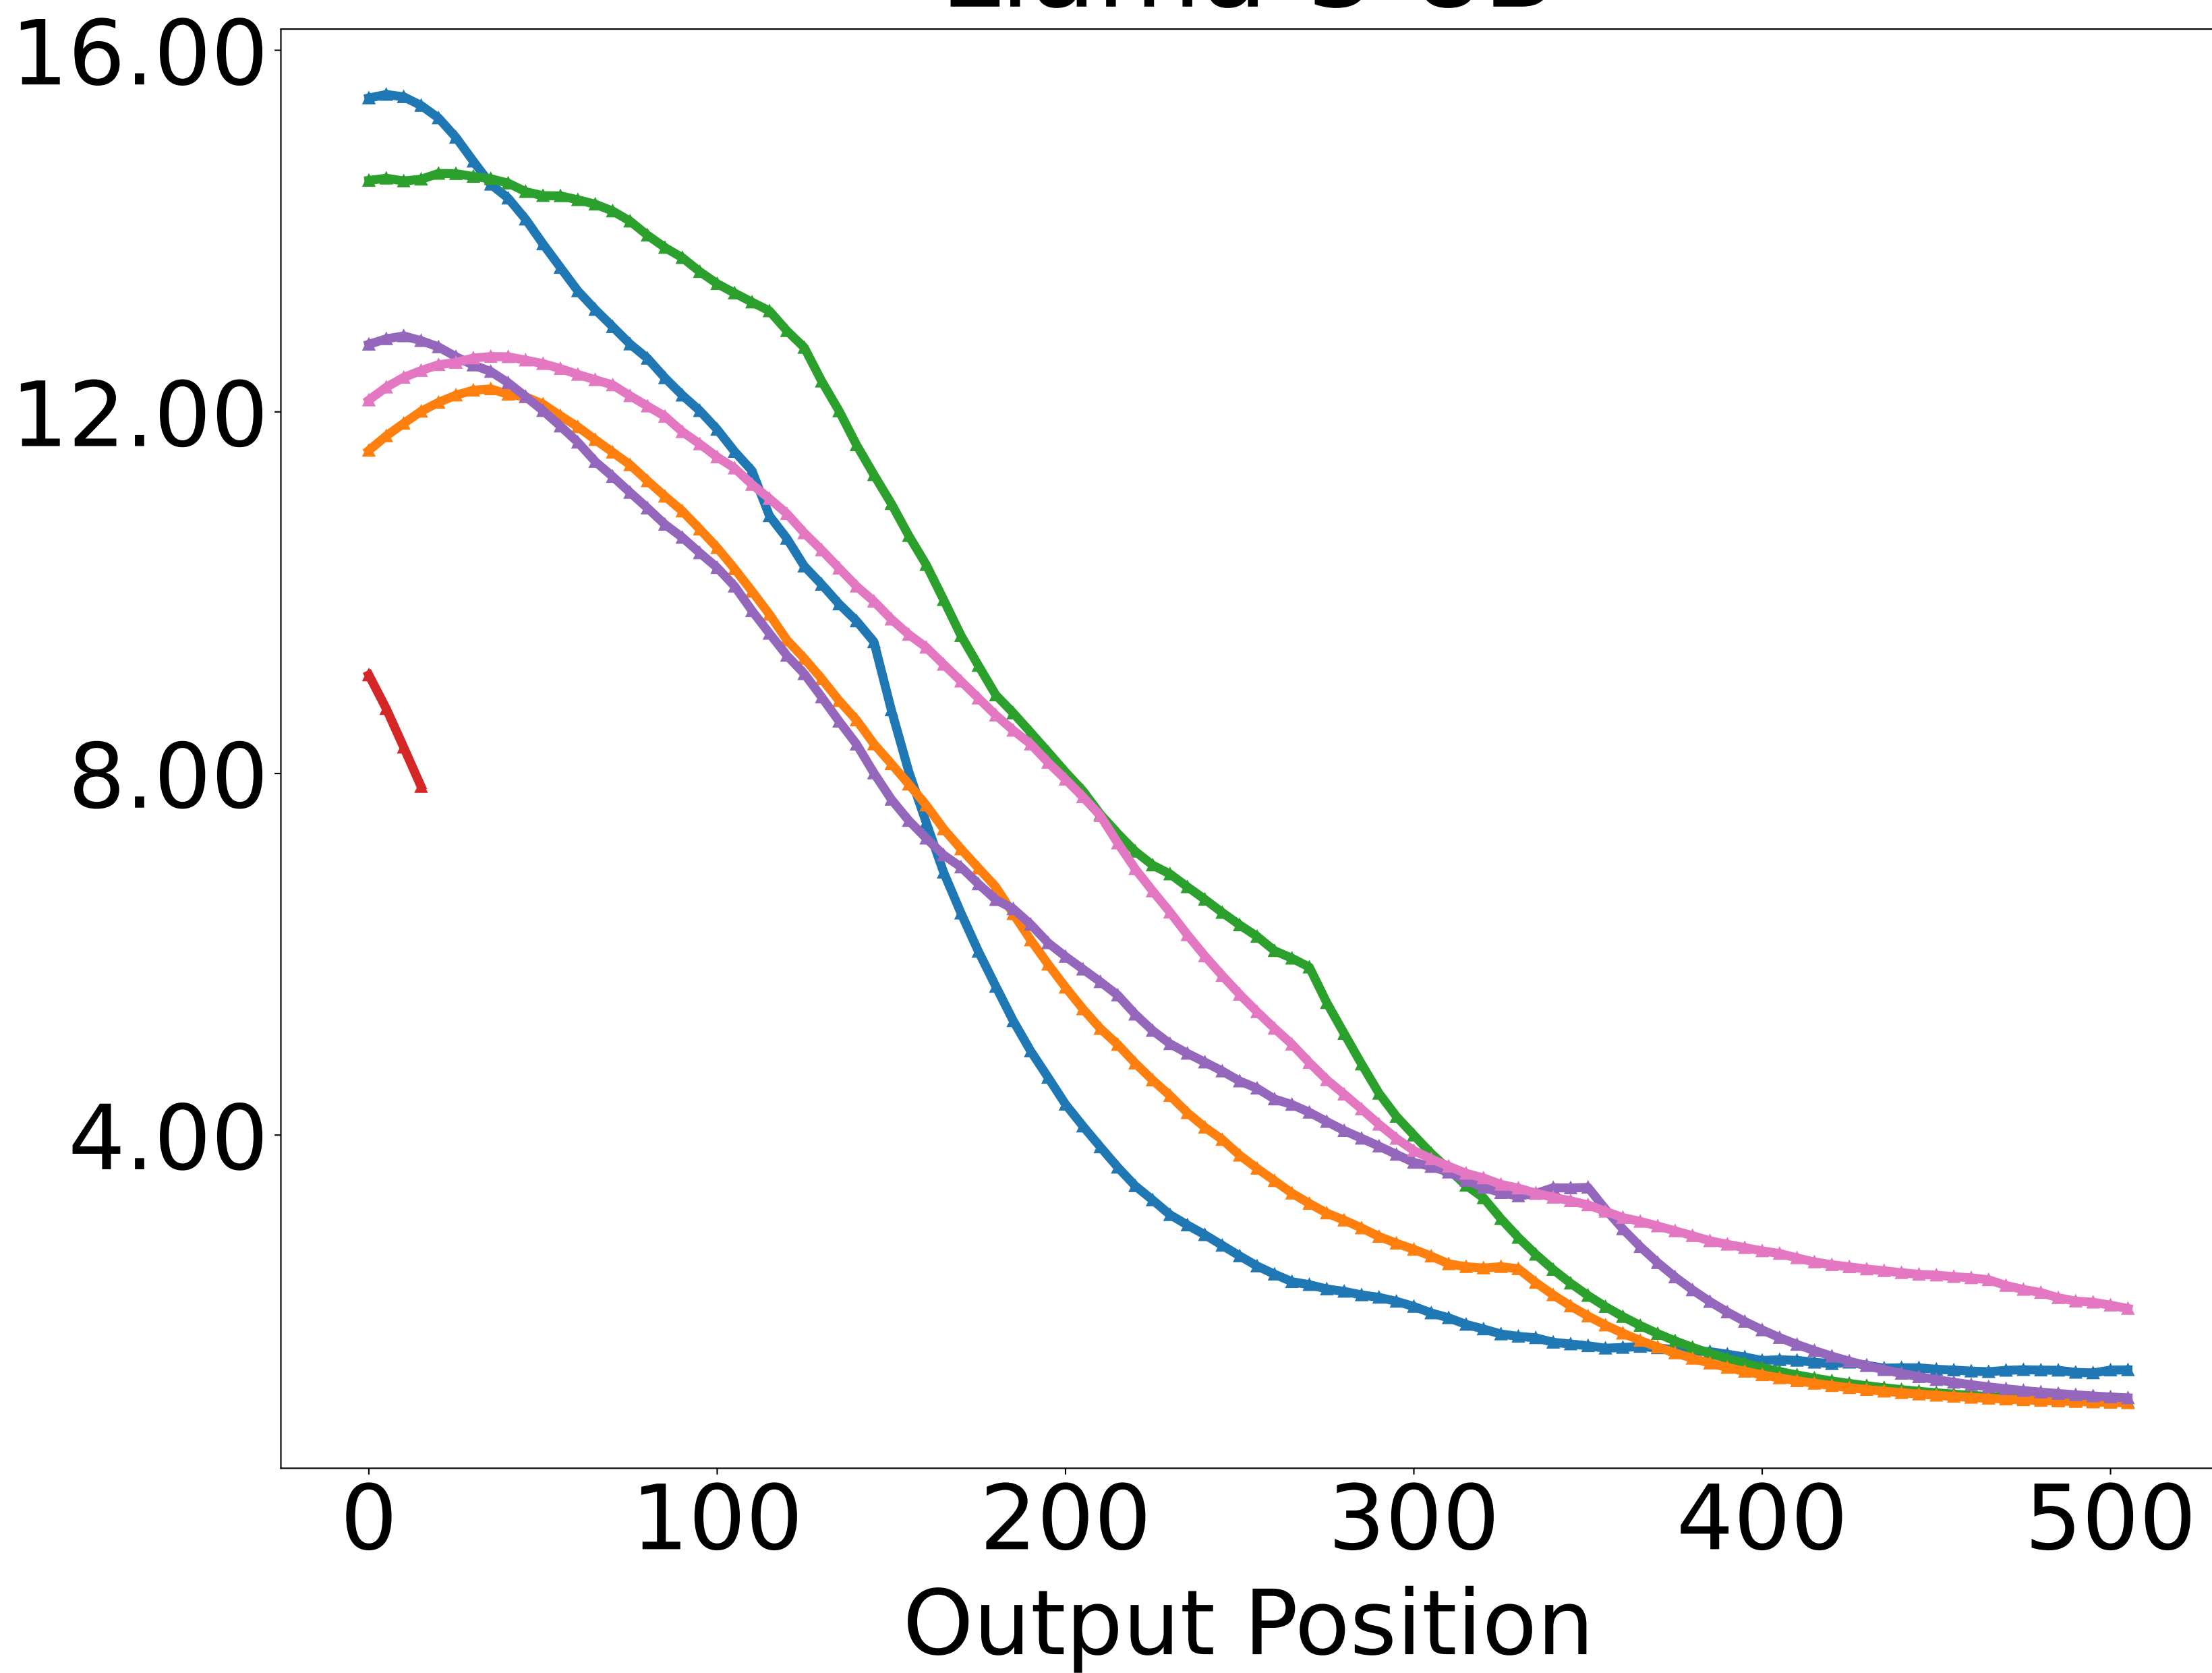

Prompt Complexity (C)



Supplement: supplementary_material [file piecewise_ebf_Llama-3-8B_bf.pdf › supplementary_materials/bf_output_dynamic/random_strings/piecewise_ebf_Llama-3-8B_bf.pdf]
